# Supplementary material
Source: Research Square preprint supplement (doi:10.21203/rs.3.rs-9075421/v1)
Supplement: Supplementary file 1 [file 1ecca2638a56e33529b46bd3.xlsx]

## Sheet: Sheet1
样本编号[v1]	1:b.性别[a1b1]	1:c.出生年份[a1c1]	1:d.教育程度出示示卡第1页[a1d1]	1:e.婚姻状况出示示卡第2页[a1e1]	您的政治面貌是：（单选）[a3]	您目前的户口性质是：（单选）[a4a]	请问您目前的工作情况是：（单选）[b1]	现在互联网比较普及，大家可以用手机和电脑上网，您平时上网（比如：用电脑或者手机看[d5a]	1.浏览时政信息（比如：看党政新闻）[d5b1]	2.娱乐、休闲（比如：玩网络游戏/听音乐/看视频/读小说）[d5b2]	3.聊天交友（比如：用微信/QQ聊天交友等交友活动）[d5b3]	4.商务或者工作（包括开网店、微商、网络主播、直播带货）[d5b4]	5.学习教育[d5b5]	6.网上购物/生活服务（比如：网购、外卖、地图导航、地图定位等）[d5b6]	7.投资理财[d5b7]	1.高考制度[f3a_1]	2.公民实际享有的政治权利[f3a_2]	3.司法与执法[f3a_3]	4.公共医疗[f3a_4]	5.工作与就业机会[f3a_5]	6.财富及收入分配[f3a_6]	7.养老等社会保障待遇[f3a_7]	8.城乡之间的权利、待遇[f3a_8]	1.与他人或网友讨论政治问题[h2a_1]	2.向报刊、电台、网络论坛等媒体反映社会问题[h2a_2]	3.向政府部门反映意见（包括通过电话、邮件等形式）[h2a_3]	4.利用专业知识参与公共政策、公共事务论证会[h2a_4]	5.通过各种渠道对政府公布的政策发表个人意见[h2a_5]	6.出席政府部门组织的有关公共政策的听证会[h2a_6]	7.到政府部门上访[h2a_7]	8.参加所在村居/单位的重大决策讨论[h2a_8]	9.参加社区组织或者自发组织的社会公益活动，比如义务献血、义务清理环境，为老年人、[h2a_9]	10.参加宗教活动[h2a_10]	11.参加线上/线下集体性维权行动[h2a_11]	12.在SSU最近一次选举中，您投票了吗？[h3b]
2206021	2	1996	2	2	4	1	3	1	6	1	1	6	6	3	6	3	3	3	3	3	3	3	3	0	0	0	0	0	0	0	0	0	0	0	1
2206015	1	1989	2	2	4	1	2	2								-1	-1	-1	3	-1	1	-1	-1	0	0	0	0	0	0	0	0	0	0	0	1
2206004	2	1964	2	2	4	1	1	2								-1	-1	2	1	-1	-1	1	1	0	0	0	0	0	0	0	0	0	0	0	1
2206020	1	2000	7	1	4	1	1	1	5	2	2	2	3	4	6	3	3	2	3	2	3	2	2	0	0	0	0	0	0	0	0	0	0	0	1
2206025	2	1987	5	1	4	1	1	1	2	2	2	3	2	4	6	3	3	3	3	3	3	3	3	0	0	0	0	0	0	0	0	0	0	0	3
2206018	2	1981	3	2	4	1	3	1	1	3	2	6	4	5	5	3	3	-1	3	-1	-1	-1	2	0	0	0	0	0	0	0	0	0	0	0	1
2206001	2	1982	2	2	4	1	2	1	6	1	6	6	6	5	6	3	4	-1	3	3	3	1	1	0	0	0	0	0	0	0	0	0	0	0	1
2206017	1	1999	4	1	2	1	3	1	2	3	1	6	6	5	6	3	2	2	3	2	2	3	2	0	0	0	0	0	0	0	0	0	0	0
2206011	1	1979	5	2	1	1	1	1	2	2	6	6	2	5	6	4	4	4	4	4	4	4	4	0	0	0	0	0	0	0	1	1	0	0	1
2206016	1	1958	2	2	4	1	3	2								-1	-1	-1	3	-1	-1	4	3	0	0	0	0	0	0	0	0	0	0	0	1
2206010	2	1972	2	2	4	1	1	2								3	-1	3	3	3	3	3	1	0	0	0	0	0	0	0	0	0	0	0	1
2203012	2	1964	2	2	4	1	1	1	6	6	2	6	6	6	6	-1	3	3	3	3	-1	-1	2	0	0	0	0	0	0	0	0	0	0	0	1
90251660118332087	2	1966	1	2	4	1	3	1	6	6	3	6	6	6	6	3	4	2	2	-1	1	1	1	0	0	0	0	0	0	0	0	0	0	0	1
2203010	2	1956	2	2	4	1	1	1	6	3	2	6	6	6	6	3	3	3	3	3	3	3	-1	0	0	0	0	0	0	0	0	0	0	0	1
90071660117862563	1	1961	4	2	4	1	1	2								3	-1	-1	1	2	3	3	1	0	0	0	0	0	0	0	0	0	0	0	1
90281660117779735	2	1991	3	2	4	1	3	1	2	1	1	6	6	1	6	3	3	3	3	3	3	3	3	0	0	0	0	0	0	0	0	0	0	0	1
90061660116602211	2	1961	2	5	4	1	1	2								2	1	3	4	4	3	3	3	0	0	0	0	0	0	0	0	0	0	0	1
2206023	1	1964	3	2	4	1	3	2								3	2	3	2	2	2	2	2	0	0	0	0	0	0	0	0	0	0	0	1
90031660116851258	2	1991	1	2	4	1	3	1	2	3	1	6	6	3	6	-1	-1	2	1	-1	1	1	1	0	0	0	0	0	0	0	0	0	0	0	2
2210004	2	1957	2	2	4	1	3	1	6	6	1	6	6	6	6	4	4	2	3	3	4	4	1	0	0	0	0	0	0	0	0	0	0	0	2
2206012	2	2002	8	1	2	1	4	1	2	1	1	6	3	3	6	4	3	3	3	2	3	3	3	1	0	0	0	0	0	0	0	0	0	0	1
2206022	2	1967	3	2	4	1	1	1	1	1	3	6	6	4	6	3	4	3	4	4	4	3	4	0	0	0	0	0	0	0	0	0	0	0	1
90261660115839465	1	1959	4	2	4	1	1	2								4	4	4	2	4	4	4	2	0	0	0	0	0	0	0	0	0	0	0	1
2203024	1	1957	2	2	4	1	3	2								-1	4	3	3	3	3	3	2	0	0	0	0	0	0	0	0	0	0	0	2
2203024Rp9021	1	1970	2	2	4	1	1	2								3	3	2	3	2	2	2	2	0	0	0	0	0	0	0	0	0	0	0	2
2210008	2	1974	2	2	4	1	1	1	3	3	3	6	6	6	6	4	3	3	3	3	3	-1	2	0	0	0	0	0	0	0	0	0	0	0	1
2206005	2	1974	3	2	4	1	1	2								-1	-1	3	3	-1	3	3	3	0	0	0	0	0	0	0	0	0	0	0	3
2206024	1	1963	4	2	4	1	1	1	1	5	6	6	6	4	6	4	4	3	3	3	-1	2	-1	1	0	0	0	0	0	0	0	1	0	0	3
2206019	2	1974	3	2	4	1	3	1	6	1	1	6	6	6	6	3	-1	3	3	3	3	2	2	0	0	1	0	0	0	0	0	0	0	0	1
2203022	2	1963	2	2	4	1	3	2								-1	-1	-1	-1	-1	-1	-1	-1	0	0	0	0	0	0	0	0	0	0	0	2
2203018	2	1988	3	2	4	1	3	1	2	1	1	6	6	6	6	3	2	3	3	2	1	3	1	0	0	0	0	0	0	0	0	0	0	0	1
90251660113331000	1	1960	3	2	1	1	3	2								4	4	2	2	2	3	1	1	0	0	0	0	0	0	0	0	0	0	0	1
2210025	1	1973	3	4	4	1	3	1	1	1	3	6	1	3	6	4	3	3	2	2	2	1	3	0	0	0	0	0	0	0	0	0	0	0	2
90071660112296285	1	1969	3	2	4	1	1	2								-1	3	-1	-1	-1	-1	-1	-1	0	0	0	0	0	0	0	0	0	0	0	1
2203003	2	1958	2	2	4	1	1	1	6	2	2	6	6	6	6	3	3	4	3	3	3	3	3	0	0	0	0	0	0	0	0	0	0	0	1
2203001	2	1973	2	2	4	1	3	1	2	1	1	6	6	5	6	3	3	3	3	3	3	4	3	0	0	0	0	0	0	0	0	0	0	0	1
2203023	1	1989	2	1	4	1	1	1	1	1	2	6	6	5	6	-1	3	3	1	3	3	-1	1	0	0	0	0	0	0	0	0	0	0	0	1
2203025	2	1970	2	2	4	1	1	1	2	1	1	6	6	4	6	3	-1	2	2	3	1	1	1	0	0	0	0	0	0	0	0	0	0	0	2
2203008	1	1964	1	2	4	1	1	2								2	2	4	4	4	1	1	1	0	0	0	0	0	0	0	0	0	0	0	1
2210003	1	1972	2	2	4	1	1	2								3	3	3	3	3	3	3	3	0	0	0	0	0	0	0	0	0	0	0	2
2210016	1	1967	4	5	4	1	1	1	1	2	2	6	6	6	6	3	3	3	3	3	1	1	1	0	0	0	0	0	0	0	0	0	0	0	1
2210011	2	1979	3	2	4	1	3	1	5	2	4	6	6	5	6	3	3	3	3	3	3	2	2	0	0	0	0	0	0	0	0	0	0	0	1
2210015	2	1965	2	5	4	1	1	2								4	4	4	4	4	4	4	4	0	0	0	0	0	0	0	0	0	0	0	1
2210021	1	1966	2	2	4	1	1	2								3	3	3	3	3	3	3	3	0	0	0	0	0	0	0	0	0	0	0	2
2210007	1	1986	3	2	4	1	1	1	6	1	6	1	6	5	6	4	-1	1	1	-1	3	1	-1	0	0	0	0	0	0	0	0	0	0	0	1
2207012	1	2003	3	1	4	2	4	1	3	1	1	2	2	2	6	4	4	3	3	3	3	3	4	1	0	0	0	0	0	0	1	1	0	0	2
2207020	2	1976	4	2	4	2	1	1	2	3	6	6	2	4	6	3	3	3	3	3	3	3	3	0	0	0	0	0	0	0	0	0	0	0	2
2207006	1	1971	2	4	4	1	1	2								3	3	3	2	3	2	3	3	0	0	0	0	0	0	0	0	0	0	0	1
2207009	2	1956	2	2	4	1	3	2								4	3	3	3	1	2	1	1	0	0	0	0	0	0	0	0	0	0	0	1
2207001	1	1969	2	2	4	1	1	2								3	2	2	1	3	2	3	3	0	0	0	0	0	0	0	0	0	0	0	1
2212005	2	1967	3	2	4	1	3	2								-1	-1	-1	3	3	3	3	-1	0	0	0	0	0	0	0	0	0	0	0	1
90081660036597156	2	1970	3	2	4	1	3	1	5	2	2	6	6	6	6	4	4	4	3	3	3	4	3	0	0	0	0	0	0	0	0	0	0	0	1
2212014	2	1953	3	2	4	1	1	2								4	4	-1	2	2	2	2	2	0	0	0	0	0	0	0	0	0	0	0	2
2212016	1	1967	2	2	4	1	1	1	6	6	3	6	6	6	6	4	3	4	4	-1	3	3	1	0	0	0	0	0	0	0	0	0	0	0	1
2207018	2	1996	7	2	2	1	3	1	2	2	1	6	2	4	6	3	3	3	3	3	3	4	3	0	0	0	0	0	0	0	0	0	0	0	2
2207016	1	1968	3	2	4	1	1	1	2	2	2	6	6	3	6	4	4	4	4	-1	4	4	4	0	0	0	0	0	0	0	0	0	0	0	1
2212020	2	1968	2	2	4	1	1	2								4	2	4	1	1	1	1	1	0	0	0	0	0	0	0	0	0	0	0	2
2212022	1	1958	3	2	4	1	1	2								4	3	3	1	3	3	3	1	0	0	0	0	0	0	0	0	0	0	0	1
2207019	1	1986	3	2	4	1	1	1	2	2	6	6	6	4	6	3	3	3	2	2	2	3	2	0	0	0	0	0	0	0	0	0	0	0	2
2207010	2	1969	2	2	4	1	1	2								-1	3	4	2	-1	3	-1	-1	0	0	0	0	0	0	0	0	0	0	0	2
2207025	2	1970	3	2	4	1	3	1	6	6	1	6	6	6	6	3	3	3	4	-1	-1	1	1	0	0	0	0	0	0	0	0	0	0	0	2
2212021	2	1964	2	2	4	1	1	1	3	6	4	6	6	6	6	4	3	2	3	-1	2	2	2	0	0	0	0	0	0	0	0	0	0	0	1
2207013	2	1975	3	2	4	1	1	1	3	2	1	6	6	6	6	-1	3	-1	2	2	2	2	2	0	0	0	0	0	0	0	0	0	0	0	2
2212023	2	1962	2	2	4	1	1	2								-1	3	4	1	-1	1	2	1	0	0	0	0	0	0	0	0	0	0	0	1
2207023	2	1963	3	2	4	1	3	2								3	3	3	1	3	3	2	1	0	0	0	0	0	0	0	0	0	0	0	1
2207011	1	1953	4	2	4	1	1	1	1	2	1	6	6	5	6	3	4	4	3	3	3	3	3	1	0	0	0	0	1	0	1	0	0	0	1
90221660022356302	2	1964	1	5	4	1	3	2								3	3	3	3	3	3	3	3	0	0	0	0	0	0	0	0	0	0	0	1
90241660022576763	2	1976	3	2	4	2	1	2								2	2	2	2	1	1	3	3	0	0	0	0	0	0	0	0	0	0	0	1
2212006	2	1974	2	3	4	2	3	1	5	1	1	6	3	5	6	-1	1	-1	-1	-1	-1	-1	-1	0	0	0	0	0	0	0	0	0	0	0	1
2212013	1	1972	2	3	4	1	1	1	3	6	2	6	6	6	6	4	2	2	2	2	2	2	2	0	0	0	0	0	0	0	0	0	0	0	1
2212002	1	1954	3	5	4	1	1	2								-1	3	3	3	3	2	2	2	1	0	0	0	0	0	0	0	0	0	0	1
2212025	2	1977	2	2	4	1	3	1	6	2	1	6	6	6	6	-1	-1	2	3	3	3	1	1	0	0	0	0	0	0	0	0	0	0	0	1
2204016	2	1969	3	2	4	1	3	1	6	6	1	6	6	3	6	3	3	3	3	3	3	3	2	0	0	0	0	0	0	0	0	0	0	0	1
2204023	2	1962	2	2	4	1	1	2								4	4	-1	4	-1	4	4	4	0	0	0	0	0	0	0	0	0	0	0	1
90221660022412044	1	1962	2	2	4	1	1	2								3	3	3	3	3	3	3	2	0	0	0	0	0	0	0	0	1	0	0	1
90251660023955519	1	1955	3	2	4	1	3	2								4	4	4	4	4	4	4	4	1	0	0	0	0	1	0	0	1	0	0	1
2204014	1	1964	3	2	4	1	1	1	2	2	1	6	6	5	6	2	2	3	2	2	3	2	2	0	0	0	0	0	0	0	0	0	0	0	1
2204011	1	1973	3	4	4	1	1	1	2	3	2	6	6	4	6	2	2	2	2	2	2	2	2	0	0	0	0	0	0	0	0	0	0	0	1
2204017	2	1987	3	2	4	1	1	1	2	1	2	6	6	5	6	2	2	3	1	3	3	1	1	0	0	0	0	0	0	0	0	0	0	0	1
2204001	1	1955	2	2	4	1	3	2								-1	4	4	4	-1	-1	4	2	0	0	0	0	0	0	0	0	0	0	0	1
2204019	2	1954	2	2	4	2	3	2								4	3	3	3	3	3	3	4	0	0	0	0	0	0	0	0	0	0	0	1
2204005	2	1965	2	2	4	1	1	1	6	6	1	6	6	6	6	-1	-1	-1	2	3	-1	3	2	0	0	0	0	0	0	0	0	0	0	0	1
2204024	2	1962	2	2	4	1	3	1	6	1	6	6	6	6	6	-1	1	-1	3	2	1	1	1	0	0	0	0	0	0	0	0	0	0	0	1
2204019Rp9021	2	1970	2	2	4	1	1	2								3	2	2	2	2	2	2	2	0	0	0	0	0	0	0	0	0	0	0	1
2204015	1	1978	3	2	4	2	1	1	1	6	1	6	6	6	6	3	3	3	2	2	2	1	1	0	0	1	0	0	0	0	0	0	0	0	1
2208012Rp9018	2	1963	3	3	4	1	3	1	6	1	6	6	6	5	6	3	3	4	1	-1	-1	1	1	0	0	0	0	0	0	0	0	0	0	0	2
2208012	2	1999	7	1	2	1	2	1	3	1	3	6	1	3	6	4	4	4	4	4	3	3	3	0	0	0	0	0	0	0	0	0	0	0	2
90141659842775019	2	1956	5	2	4	3	1	1	1	1	6	6	6	5	6	4	2	-1	4	1	1	2	-1	0	0	1	0	0	0	0	0	0	0	0	2
90061659956311592	2	1962	2	2	4	1	1	2								-1	4	4	2	2	3	2	2	0	0	0	0	0	0	0	0	0	0	0	1
90041659956294223	1	1975	2	2	4	1	1	2								3	3	3	3	3	3	3	3	0	0	0	0	0	0	0	0	0	0	0	1
90021659952680181	1	1972	3	2	4	1	1	1	3	2	1	6	5	3	6	4	3	3	2	-1	3	3	3	0	0	0	0	0	0	0	0	0	0	0	1
2208008	2	1970	2	3	4	1	1	1	2	1	3	6	6	5	6	3	3	3	1	3	3	2	1	0	0	0	0	0	0	0	0	0	0	0	1
2208018	2	1959	2	2	4	1	3	2								3	3	3	3	3	3	3	3	0	0	0	0	0	0	0	0	0	0	0	2
2211010	1	1972	2	1	4	1	3	2								4	2	4	4	-1	4	1	1	0	0	0	0	0	0	0	0	0	0	0	1
2211012	2	1957	1	2	4	1	3	2								-1	-1	-1	3	-1	-1	2	-1	0	0	0	0	0	0	0	0	0	0	0	2
2211024	1	1971	3	4	4	1	1	1	1	1	1	6	6	4	6	3	3	2	4	2	2	2	1	1	1	0	0	0	0	0	0	0	0	0	1
2211009	2	1955	1	2	4	1	1	1	1	1	2	6	6	4	6	-1	-1	4	-1	-1	-1	4	1	0	0	0	0	0	0	0	0	0	0	0	1
2208009	1	1999	3	1	2	1	3	1	3	1	1	2	3	3	6	3	3	3	3	3	3	3	3	0	0	0	0	0	0	0	0	0	0	0	1
2208024	2	1955	1	2	4	1	3	2								4	-1	-1	2	-1	3	2	1	0	0	0	0	0	0	0	0	0	0	0	1
2211018	2	1953	2	2	4	1	1	1	6	1	2	6	6	6	6	3	3	2	3	3	1	1	2	0	0	0	0	0	0	0	0	0	0	0	1
2211015	1	1966	2	2	4	1	1	1	1	1	2	6	6	6	6	3	3	3	3	3	2	1	1	0	0	0	0	0	0	0	1	0	0	0	1
2211001	1	1956	2	2	4	1	3	2								3	3	4	4	1	1	1	1	0	0	0	0	0	0	0	0	0	0	0	1
90131659939344209	2	1973	4	2	4	2	1	1	4	1	3	5	6	5	5	3	3	2	3	2	2	3	3	0	0	0	0	0	0	0	0	0	0	0	2
2211014	2	1957	3	3	4	1	1	2								-1	3	-1	1	-1	-1	1	1	0	0	0	0	0	0	0	0	0	0	0	1
2211007	1	1963	2	2	4	1	1	2								1	1	3	3	3	3	3	3	0	0	0	0	0	0	0	0	0	0	0	1
2211008	1	1960	2	2	4	1	1	2								4	4	4	4	4	4	3	4	0	0	0	0	0	0	0	0	0	0	0	1
2211019	2	1955	1	5	4	1	3	2								4	4	4	3	3	-1	2	1	0	0	0	0	0	0	0	0	0	0	0	1
2208006	2	1960	1	2	4	1	3	2								-1	3	3	3	-1	-1	-1	2	0	0	0	0	0	0	0	0	0	0	0	1
2208016	2	1965	2	3	4	1	3	1	6	1	6	6	6	6	6	-1	-1	-1	4	4	-1	2	1	0	0	0	0	0	0	0	0	0	0	0	1
2208007	2	1997	3	2	4	1	2	1	2	1	2	1	2	1	2	3	2	2	1	3	3	3	3	1	0	1	0	0	0	0	0	0	0	0	2
2208013	2	1990	3	2	2	1	3	1	3	1	1	5	6	5	6	4	3	1	1	1	1	3	1	0	0	0	0	0	0	0	0	0	0	0	2
90151659842399039	2	1965	3	5	4	1	3	1	2	1	3	6	6	4	6	3	4	3	3	3	2	1	3	0	0	0	0	0	0	0	0	0	0	0	2
90211659925376834	1	1971	2	2	4	1	1	1	1	6	4	6	6	6	6	3	3	3	3	3	3	2	2	0	0	0	0	0	0	0	0	1	0	0	1
2202005	2	1968	3	2	4	1	3	1	6	2	1	6	6	4	6	-1	2	3	2	3	3	3	2	0	0	0	0	0	0	0	1	0	0	0	2
2208005	1	1956	3	5	4	1	3	2								3	4	4	4	-1	4	3	4	0	0	0	0	0	0	0	0	1	0	0	1
2208019	1	1968	1	2	4	1	3	2								4	4	4	4	4	4	3	4	0	0	0	0	0	0	0	0	0	0	0	1
2208015	2	1963	4	2	4	1	3	2								4	3	4	3	4	3	3	3	0	0	0	0	0	0	0	0	0	0	0	1
90251659926484126	1	1967	3	2	4	1	3	2								4	4	4	4	2	2	4	-1	0	0	0	0	0	0	0	0	0	0	0	1
90231659881043885	2	1977	3	2	4	3	1	1	4	1	1	6	6	4	6	3	3	2	2	2	2	1	2	1	0	0	0	0	0	0	0	0	0	0	1
90241659915035460	2	1971	2	2	4	1	1	1	6	2	6	6	6	6	6	4	4	4	4	4	4	4	4	0	0	0	0	0	0	0	0	0	0	0	1
2202015	1	1966	1	2	4	1	1	2								4	1	3	3	4	1	3	1	0	0	0	0	0	0	0	0	0	0	0	1
90151659921901305	1	1970	3	2	4	2	1	1	1	5	2	6	6	4	6	3	3	3	3	3	3	-1	3	0	0	0	0	0	0	0	0	0	0	0	2
90121659842358543	1	1995	7	1	2	2	1	1	1	1	1	1	5	1	5	3	2	2	3	3	3	3	3	1	0	0	0	0	0	0	0	0	0	0	2
90231659881092123	2	1971	2	3	4	3	1	1	1	6	1	6	6	4	6	-1	-1	-1	2	-1	2	-1	2	0	0	0	0	0	0	0	0	0	0	0	2
90241659915020771	1	1960	4	2	4	1	1	1	1	3	1	6	1	4	6	4	4	4	2	3	3	3	3	0	0	0	0	0	0	0	0	0	0	0	1
90261659920178714	2	1974	3	2	4	1	3	1	6	6	6	6	6	6	6	4	4	4	4	3	3	3	3	0	0	0	0	0	0	0	0	0	0	0	2
2202018	1	1964	2	2	4	1	3	2								-1	4	-1	1	-1	-1	-1	3	0	0	1	0	0	0	0	0	0	0	0	1
2202017	2	1957	3	2	4	1	3	1	6	1	6	6	6	6	6	4	4	4	3	2	3	3	2	0	0	0	0	0	0	0	0	0	0	0	1
2202022	2	1961	3	2	4	1	3	2								3	3	3	-1	3	-1	3	2	0	0	0	0	0	0	0	0	0	0	0	1
2202011	2	1966	2	2	4	1	3	1	6	1	1	6	6	6	6	4	4	4	1	4	4	1	2	0	0	0	0	0	0	0	0	0	0	0	1
2205007	2	1988	3	1	4	1	1	1	3	2	3	6	6	6	6	-1	-1	-1	-1	-1	-1	-1	-1	0	0	0	0	0	0	0	0	0	0	0	3
2202024	2	1972	5	2	4	1	1	1	4	1	4	6	5	4	6	3	3	3	3	3	3	3	3	0	0	0	0	0	0	0	0	0	0	0	3
2202008	2	1961	2	2	4	1	3	2								4	4	4	3	2	2	3	2	0	0	0	0	0	0	0	0	0	0	0	1
2202009	1	1966	3	3	4	1	3	2								4	3	3	1	2	2	1	1	0	0	0	0	0	0	0	0	0	0	0	1
2202007	1	1971	2	1	2	1	3	1	4	1	1	1	6	6	6	3	2	2	2	2	2	2	2	1	0	0	0	0	0	0	0	0	0	0	1
2209010	1	1991	5	2	4	3	3	1	3	4	3	6	6	2	6	3	3	3	3	3	3	3	3	0	0	0	0	0	0	0	0	0	0	0	2
90041659841170783	2	1974	5	2	4	2	1	1	1	1	1	1	2	3	6	4	4	3	3	3	3	3	3	0	0	0	0	0	0	0	0	0	0	0	1
2205006	2	1954	2	3	4	1	3	2								-1	4	3	3	3	3	3	-1	0	0	0	0	0	0	0	0	0	0	0	2
90021659835586526	1	1991	5	6	1	2	1	1	2	1	2	6	6	5	6	4	4	4	4	4	4	4	-1	0	0	0	0	0	0	0	0	0	0	0
90061659784435231	1	1967	4	2	4	3	2	1	1	2	2	6	6	2	6	3	1	1	2	1	1	1	1	0	0	0	0	0	0	0	0	0	0	0
2205015	1	1970	3	2	4	1	1	2								3	3	4	3	2	2	2	2	0	0	0	0	0	0	0	0	1	0	0	2
90231659763044611	1	1963	2	2	4	3	1	1	6	2	1	6	6	6	6	3	3	3	3	2	2	2	2	0	0	0	0	0	0	0	0	0	0	0	2
90221659750808714	1	1959	4	4	4	2	3	1	1	1	2	6	6	4	6	3	3	2	3	2	2	2	3	0	0	0	0	0	0	0	0	0	0	0	1
2205024	2	1982	3	2	4	1	3	1	3	1	6	6	2	4	6	3	2	3	3	3	2	2	2	0	0	0	0	0	0	0	0	1	0	0
90251659776643707	1	1973	4	2	4	2	3	1	3	6	6	2	1	6	6	2	3	3	3	2	2	3	2	1	0	0	0	0	0	0	0	1	0	1	1
90241659763555018	1	1963	3	4	4	2	3	2								4	4	4	4	4	4	4	4	0	0	0	0	0	0	0	0	0	0	0	3
90261659760736365	1	1969	4	2	1	2	3	2								3	3	3	3	3	-1	3	3	0	0	0	0	0	0	0	0	1	0	0	1
90081659773848071	2	1963	3	5	4	1	1	1	6	6	6	6	6	6	6	2	2	2	2	2	2	2	2	0	0	0	0	0	0	0	0	0	0	0	2
90041659772217398	1	1955	3	2	4	1	3	2								-1	3	4	4	-1	-1	3	4	0	0	0	0	0	0	0	0	0	0	0
90021659771914673	2	1985	2	2	4	1	3	1	3	1	1	6	6	4	6	3	3	1	1	2	3	2	2	0	0	0	0	0	0	0	0	0	0	0	2
2205003	1	1987	7	1	4	2	3	1	1	2	1	3	3	3	6	4	4	4	4	3	3	4	4	0	0	0	0	0	0	0	0	0	0	0	2
90231659762145652	2	1982	2	4	4	1	3	1	1	1	1	6	6	5	6	3	2	3	3	3	3	4	3	0	0	0	0	0	0	0	0	0	0	0	3
90211659760591661	1	2001	3	1	4	3	3	1	5	1	1	5	5	1	6	3	3	3	3	3	3	3	3	0	0	0	0	0	0	0	0	0	0	0	2
90281659770466910	2	1993	5	1	4	1	3	1	1	1	3	6	6	3	6	3	3	3	3	2	1	3	3	0	0	0	0	0	0	0	0	0	0	0	2
90261659760568342	1	1962	4	4	4	2	3	2								2	3	2	1	2	2	3	2	0	0	0	0	0	0	0	0	1	0	0	1
90221659750872694	2	1956	4	4	4	2	3	2								4	3	3	3	4	4	3	4	0	0	0	0	0	0	0	1	1	0	0	1
2209028	1	1996	9	1	4	3	3	1	3	1	1	6	3	5	6	3	2	3	3	3	2	3	1	1	0	0	0	0	0	0	0	0	0	0
90211659760364068	1	1960	8	4	4	3	1	1	1	3	3	2	6	3	6	3	3	3	3	3	2	2	3	0	0	0	0	0	0	1	0	1	0	0	1
2205001	1	2001	3	1	4	1	2	1	4	1	1	1	6	1	1	-1	3	4	4	4	4	4	4	0	0	0	0	0	0	0	0	0	0	0	2
2209043	2	2002	8	1	2	1	4	1	3	1	1	2	1	2	6	3	3	3	3	2	3	3	3	1	0	0	1	0	0	0	0	0	0	0	2
2205010	2	1953	1	3	4	1	3	2								-1	-1	3	3	-1	-1	1	2	0	0	0	0	0	0	0	0	0	0	0	2
2205016	1	1993	5	2	4	1	2	1	2	2	6	1	4	4	6	3	2	2	2	2	3	3	2	0	0	0	0	0	0	0	0	0	0	0	1
2209019	2	1984	3	2	4	1	1	1	2	2	1	2	1	3	6	3	3	3	3	3	3	3	3	0	0	0	0	0	0	0	0	0	0	0
2205008	2	1978	5	2	4	3	3	1	1	6	1	1	1	4	6	4	4	4	4	4	3	3	3	0	0	0	0	0	0	0	0	0	0	0	2
90241659752720404	1	1966	4	4	4	2	1	1	6	4	3	6	6	6	6	2	1	1	3	1	2	2	2	0	0	0	0	0	0	0	0	0	0	0	3
2209022	1	2001	2	1	4	3	3	1	6	1	1	6	6	3	6	1	2	2	2	2	2	2	2	0	0	0	0	0	0	0	0	0	0	0	2
2205022	2	1988	3	2	4	1	3	1	6	6	1	4	1	4	6	4	4	4	4	3	3	3	3	0	0	0	0	0	0	0	0	0	0	0
2205012	1	1983	3	2	4	1	3	1	1	2	6	6	3	5	6	3	3	3	2	2	2	2	2	0	0	0	0	0	0	0	0	0	0	0
90281659753206605	1	1960	4	2	4	3	3	1	1	1	6	6	6	3	6	3	3	3	2	1	2	2	1	0	0	0	0	0	0	0	0	0	0	0	2
2209014	1	1980	3	2	4	1	1	1	1	2	1	2	4	6	6	3	3	3	3	3	3	3	3	0	0	0	0	0	0	0	0	0	0	0	2
90221659750994363	1	1955	3	1	4	2	3	2								2	3	3	2	2	2	2	3	1	0	0	0	0	0	0	0	0	0	0	2
2209015	1	1982	3	2	4	1	3	1	3	4	1	2	5	3	6	3	2	3	3	3	3	1	2	0	0	0	0	0	0	0	0	1	0	0	2
2209017	2	1972	2	4	4	1	1	1	6	6	2	6	6	6	6	3	3	3	3	3	3	3	3	0	0	0	0	0	0	0	0	0	0	0
2209002	1	1966	2	3	4	1	1	1	6	6	6	6	6	6	6	-1	-1	-1	4	4	2	1	1	0	0	0	0	0	0	0	0	0	0	0	2
2201002	2	1953	2	2	4	2	3	1	6	3	2	6	6	6	6	4	-1	3	2	2	1	1	1	0	0	0	0	0	0	0	0	0	0	0	1
4604154	2	2003	8	1	4	2	4	1	2	1	2	6	4	3	6	3	3	3	3	3	3	3	3	1	0	0	0	0	0	0	0	0	0	0	3
4604123	2	1999	8	1	2	2	4	1	2	2	2	6	2	2	2	3	3	3	3	2	3	3	3	0	0	0	0	0	0	0	0	0	0	0	3
4604163	2	1965	2	2	4	1	3	2								3	3	3	3	3	3	3	3	1	0	0	0	0	0	0	0	0	0	0	3
4604134	1	1962	4	2	4	1	3	2								3	3	3	3	3	3	3	3	0	0	0	0	0	0	0	0	0	0	0	1
4604116	1	1998	5	1	4	3	2	1	6	1	1	1	4	4	6	4	4	3	3	2	1	3	2	1	0	0	0	0	0	0	0	0	0	0	2
4604170	1	1998	4	1	4	1	2	1	2	2	2	2	2	2	6	4	3	3	3	3	3	3	3	0	0	0	0	0	0	0	0	0	0	0	2
4604195	2	1961	3	2	4	2	3	1	2	1	1	6	6	6	6	3	3	3	3	3	3	3	3	0	0	0	0	0	0	0	0	0	0	0	1
4604161	1	1962	4	2	4	1	3	2								4	-1	3	3	3	3	1	1	0	0	0	0	0	0	0	0	0	0	0	2
4604112	1	1963	2	2	4	2	3	2								4	3	3	3	3	4	2	4	0	0	0	0	0	0	0	0	0	0	0	1
4604203	2	1956	2	2	4	2	1	2								3	3	3	3	3	3	3	3	0	0	0	0	0	0	0	0	0	0	0	2
4604165	1	1978	3	4	4	2	3	1	1	1	5	6	6	2	6	3	2	1	2	1	4	3	1	1	0	0	0	0	0	0	0	1	0	0	2
4604117	2	1957	2	2	4	2	3	2								3	3	3	3	3	3	3	3	0	0	0	0	0	0	0	0	0	0	0	3
4604182	2	1957	4	2	4	2	3	2								4	4	4	4	4	4	4	4	0	0	0	0	0	0	0	0	0	0	0	2
4604146	2	1971	3	4	4	3	3	1	5	2	4	6	6	5	6	3	3	3	2	3	3	3	3	0	0	0	0	0	0	0	0	0	0	0	3
4604198	1	1965	3	2	4	3	3	2								3	2	3	3	2	2	3	2	0	0	0	0	0	0	0	0	0	0	0	1
4604181	1	1997	8	1	2	2	3	1	4	1	1	5	4	4	6	3	3	4	3	3	2	3	3	0	0	0	1	0	0	0	0	0	0	1	2
4604128	2	1966	5	3	4	2	3	2								3	3	3	3	3	3	1	3	0	0	0	0	0	0	0	0	0	0	0	2
4604141	1	2001	8	1	2	1	4	1	1	1	1	3	2	4	6	4	4	4	4	4	3	3	3	1	0	0	0	0	0	0	0	0	0	0	2
4604188	2	1958	7	2	4	2	3	2								3	4	3	3	2	2	4	3	0	0	0	0	0	0	0	0	0	0	0	2
89971642568728195	2	1977	5	5	4	2	1	1	1	1	6	1	2	4	6	4	2	3	3	3	3	2	3	0	0	1	0	0	0	1	0	1	0	0	1
4603170	2	1993	3	2	4	1	3	1	1	2	2	6	6	4	6	3	2	2	2	2	2	2	2	0	0	0	0	0	0	0	0	0	0	0	1
4603168	1	1983	3	1	4	1	3	1	5	1	1	6	6	6	6	4	4	4	4	4	4	4	4	0	0	0	0	0	0	0	0	0	0	0	1
4603162	2	1961	2	2	4	1	3	2								4	3	3	3	3	3	3	3	0	0	0	0	0	0	0	0	0	0	0	1
4603203	2	1967	2	2	4	2	3	2								3	3	3	3	2	3	3	3	0	0	0	0	0	0	0	0	0	0	0	1
4603163	2	1978	3	2	1	1	1	1	3	3	3	6	2	3	6	4	4	4	4	4	4	4	4	0	0	0	0	0	0	0	0	1	0	0	1
4603111	1	1967	2	2	4	1	3	2								2	2	4	4	4	4	4	4	0	0	0	0	0	0	0	0	0	0	0	2
4603159	2	1963	1	2	4	1	3	2								4	3	3	3	3	3	3	3	0	0	0	0	0	0	0	0	0	0	0	1
89931642849231089	1	1968	3	2	4	2	1	1	1	1	1	1	1	3	6	3	3	3	3	3	2	2	1	0	0	0	0	0	0	0	0	0	0	0	1
4603157	2	1965	1	2	4	1	3	2								4	3	4	3	2	2	3	3	0	0	0	0	0	0	0	1	0	0	0	1
4603137	2	1981	3	2	4	1	1	1	6	1	1	6	6	4	6	2	2	3	3	2	2	2	2	0	0	0	0	0	0	0	1	1	0	0	1
4603185	1	1966	3	2	4	1	1	2								4	4	4	4	4	4	4	4	0	0	0	0	0	0	0	0	0	0	0	1
4603172	2	1992	2	3	4	1	3	2								1	3	3	1	3	3	3	2	0	0	0	0	0	0	0	0	1	0	0	3
89931642843025726	1	1986	7	1	4	1	1	1	1	1	1	1	1	1	6	3	1	2	3	2	1	3	2	1	0	0	0	0	0	0	0	0	0	0	2
4502025	1	1954	3	2	4	3	3	2								3	3	3	4	3	3	3	2	0	0	0	0	0	0	0	0	0	0	0	1
4603138	1	1952	4	2	1	1	3	2								4	4	4	4	4	4	4	4	0	0	0	0	0	0	0	1	0	0	0	1
4603188	1	1973	2	2	4	1	1	2								4	3	3	3	3	3	3	3	0	0	0	0	0	0	0	0	0	0	0	1
4603169	2	1990	3	2	4	1	1	1	1	1	1	1	1	1	1	3	3	3	3	3	3	3	3	0	0	0	0	0	0	0	0	0	0	0	2
4603154	1	1984	3	2	4	1	2	1	1	1	1	6	6	4	6	3	3	3	3	3	3	3	3	0	0	0	0	0	0	0	0	0	0	0	1
4603147	1	2000	6	1	2	3	3	1	4	2	1	6	6	1	4	3	2	2	2	2	2	1	3	0	0	0	0	0	0	0	0	0	0	0	3
4603151	2	1990	3	2	4	1	3	2								4	3	2	3	3	3	3	2	0	0	0	0	0	0	0	0	0	0	0	1
4502021	1	1972	4	2	4	2	1	1	2	6	3	1	5	4	5	3	3	3	3	3	2	2	3	0	0	1	0	1	0	1	0	0	0	1	2
4603206	1	1990	2	1	4	1	1	1	1	1	1	6	6	4	6	4	4	3	3	3	3	3	3	0	0	0	0	0	0	0	0	0	0	0	1
4603167	1	1953	4	2	4	1	1	2								4	4	4	4	4	4	4	4	0	0	0	0	0	0	0	0	0	0	0	1
4502014	1	1975	3	2	4	1	2	1	6	1	1	6	6	3	6	3	3	3	2	2	2	3	2	0	0	0	0	0	0	0	0	0	0	0	2
4502011	2	1962	2	3	4	3	3	2								3	3	3	3	3	3	3	3	0	0	0	0	0	0	0	0	0	0	0	1
4502008	1	1983	4	2	1	2	1	1	1	1	2	1	4	6	6	1	2	2	2	3	1	1	1	0	0	0	0	0	0	0	0	0	0	0	2
4502023	2	1986	3	2	4	1	3	1	4	4	1	6	2	2	6	2	3	3	2	2	2	2	3	1	0	0	0	0	0	0	0	0	0	0	2
89771642809451160	2	1981	5	2	4	1	3	1	3	3	3	3	1	5	6	3	3	3	3	3	3	3	3	0	1	1	0	0	0	1	0	0	0	0	2
89801642770211473	2	1988	7	2	4	1	1	1	5	1	1	6	5	3	6	4	3	4	2	3	2	2	2	1	0	0	0	0	0	0	1	0	0	1	3
4502007	2	1975	4	2	4	1	3	1	1	1	1	6	6	4	6	1	1	2	1	3	3	2	2	0	0	0	0	0	0	1	0	0	0	0	2
4502002	2	1974	4	2	4	2	3	1	1	6	1	6	2	5	6	3	3	3	3	3	3	2	2	0	0	0	0	0	0	0	0	0	0	0	1
4602147	2	1984	7	2	4	1	2	1	1	1	1	1	1	1	1	3	3	3	2	3	3	3	3	0	0	0	0	0	0	0	0	0	0	0	3
4602169	2	1997	5	6	4	1	1	1	6	1	1	6	6	1	6	3	3	3	2	3	3	3	3	1	0	0	0	0	0	0	0	0	0	1	3
89891642762992986	1	1964	3	2	4	3	3	2								3	3	2	3	3	3	3	3	0	0	0	0	0	0	0	0	0	0	0	1
4502003	2	1957	4	3	4	2	3	1	6	2	1	6	6	6	6	3	3	3	3	3	-1	3	-1	0	0	0	0	0	0	0	0	0	0	0	2
4602200	1	1978	3	2	4	1	3	1	2	3	2	6	6	6	6	2	3	4	4	3	3	3	3	0	0	0	0	0	0	0	1	0	0	0	2
4502010	1	1953	2	3	4	3	3	2								3	3	3	3	-1	3	3	1	0	0	0	0	0	0	0	0	0	0	0	2
4602153	2	1972	3	2	4	1	2	2								3	3	3	3	2	2	1	2	0	0	0	0	0	0	0	0	0	0	0	2
4502009	1	1958	3	3	4	3	3	1	1	6	1	6	1	4	6	4	2	-1	2	2	1	1	2	0	0	0	0	0	0	0	0	1	0	0	2
4502022	2	1969	2	2	4	1	1	2								3	-1	3	2	3	1	3	1	0	0	0	0	0	0	0	0	0	0	0	3
4602196	1	1980	1	1	4	1	3	1	6	1	1	1	2	4	6	3	3	1	1	1	1	1	1	0	1	1	0	0	0	0	0	0	0	0	3
4502015	1	1983	7	2	4	3	1	1	1	1	1	1	6	5	6	2	4	4	4	3	2	2	2	1	0	0	0	0	0	0	0	0	0	0	2
4502005	2	1958	4	3	4	3	1	2								2	3	3	1	1	1	1	1	0	0	0	0	0	0	0	0	0	0	0	2
4602159	2	1994	5	6	4	1	1	1	1	1	1	1	1	1	6	4	3	4	4	3	3	3	3	0	0	0	0	0	0	0	0	0	0	0	3
4602113	2	1977	3	2	4	1	1	1	2	6	2	6	1	1	6	3	3	3	3	3	3	3	3	0	0	0	0	0	0	1	0	0	0	0	3
4602197	2	1987	3	2	4	1	1	1	1	6	1	1	1	1	6	2	3	4	1	4	4	2	-1	0	0	0	0	0	0	0	0	0	0	0	3
4602185	1	1966	2	2	4	1	1	2								2	3	-1	3	4	3	-1	2	0	0	0	0	0	0	0	0	0	0	0	2
4601127	2	1994	7	2	4	2	3	1	1	3	1	1	1	4	6	3	3	3	3	3	3	3	3	0	0	1	0	0	0	0	0	1	0	0	1
4602120	1	1992	7	1	4	1	2	1	1	2	1	6	2	2	1	3	3	3	3	3	3	3	3	1	1	0	0	0	0	0	0	0	0	0	1
4602137	2	1965	2	2	4	3	3	2								4	3	3	-1	3	3	3	3	0	0	0	0	0	0	0	1	0	0	0	1
4502001	1	1971	3	2	4	3	3	1	2	1	1	6	6	4	6	3	3	3	-1	3	2	2	2	0	0	0	0	0	0	0	0	1	0	0	1
4602142	2	1965	2	2	4	1	1	2								3	3	3	3	2	3	3	2	0	0	0	0	0	0	0	0	0	0	0	3
89931642674302079	2	1975	5	3	2	1	1	1	3	3	1	1	2	5	6	3	3	2	2	3	3	-1	2	0	0	0	0	0	0	0	0	0	0	0	2
4602126	1	1963	3	2	4	1	3	2								3	2	4	2	2	2	2	2	0	1	0	0	0	0	0	0	0	0	0	3
4602119	1	1982	2	2	4	1	1	1	3	1	1	1	6	1	6	3	1	2	2	2	2	2	2	0	0	0	0	0	0	0	0	0	0	0	3
4602138	1	1997	7	1	2	2	1	1	1	1	1	6	3	4	5	4	3	3	3	3	3	3	3	1	0	0	0	0	0	0	0	1	0	0	2
89971642568604284	2	1985	3	2	4	3	3	1	3	1	1	6	4	3	6	3	3	3	3	-1	3	3	-1	0	0	0	0	0	0	0	0	0	0	0	2
4601199	1	1998	5	1	2	2	1	1	3	1	1	6	6	3	6	4	4	3	3	3	3	4	3	0	0	0	0	0	0	0	0	0	0	0	2
89971642568925138	1	1991	7	2	1	3	1	1	4	1	6	1	4	5	6	2	3	2	3	3	2	3	2	1	0	1	0	0	1	0	1	1	0	0	1
4601142	2	1958	2	2	4	2	3	2								4	4	4	4	4	4	4	4	0	0	1	0	0	0	0	0	0	0	0	2
4601166	2	1979	2	2	4	1	1	1	5	5	1	5	5	4	6	3	3	3	3	3	3	3	3	0	0	0	0	0	0	0	0	0	0	0	2
4601112	1	1976	4	2	4	1	1	1	1	2	1	6	6	5	6	3	3	2	3	3	3	2	2	0	0	0	0	0	0	0	0	0	0	0	2
4601200	1	1982	3	2	4	1	1	1	3	3	1	6	3	5	6	4	3	3	3	3	3	4	2	0	0	0	0	1	1	0	1	1	0	0
4501006	2	1981	3	3	4	2	2	1	1	2	2	3	2	5	5	3	3	3	3	3	3	3	3	0	0	0	0	0	0	0	0	0	0	0
4601123	1	1999	9	1	2	2	4	1	1	1	1	5	3	2	1	4	3	3	2	2	2	3	2	1	0	0	0	0	0	0	0	0	0	0	2
4601173	2	1988	9	2	4	3	1	1	1	1	1	5	5	1	5	3	3	3	3	3	3	3	3	0	1	0	0	0	0	0	0	0	0	0	3
4601176	2	1966	2	2	4	1	1	2								3	4	4	-1	1	1	1	1	0	0	0	0	0	0	0	0	0	0	0	3
4601133	2	1968	3	2	4	1	1	1	4	3	2	6	6	6	6	1	2	1	1	2	1	2	2	0	0	0	0	0	0	0	0	0	0	0	2
89971642568663166	2	1971	5	2	4	2	1	1	1	2	1	6	3	2	6	3	3	3	3	2	2	3	2	1	0	0	0	0	0	0	1	1	0	0	1
4601156	2	1975	4	5	4	2	2	2								3	2	2	3	3	3	3	3	0	0	0	0	0	0	0	0	0	0	0	2
4601147	2	1979	3	2	4	1	1	1	2	1	1	1	2	1	6	2	2	3	3	1	1	3	3	0	0	0	0	0	0	0	0	0	0	0	3
4601120	2	1990	8	2	4	3	1	1	1	1	1	1	1	1	1	3	3	3	3	3	3	3	3	0	0	0	0	0	0	0	0	0	0	0	2
4601126	2	1997	8	1	2	2	1	1	1	2	1	1	2	2	2	3	3	3	3	2	2	3	2	1	0	1	1	0	0	0	0	0	0	0	1
4601160	2	2001	7	1	2	1	4	1	2	1	1	2	2	2	6	3	3	3	3	3	3	3	3	0	0	0	0	0	0	0	0	0	0	0	2
4601168	2	1986	2	2	4	1	2	1	6	2	1	6	6	2	6	3	2	3	3	3	3	3	3	0	0	0	0	0	0	0	0	0	0	0	2
4501010	2	1975	5	5	4	3	1	1	1	1	1	6	3	4	6	4	4	-1	4	3	3	-1	3	1	0	0	0	0	0	0	0	0	0	0	1
4501019	1	1955	3	2	1	1	3	2								3	4	3	3	4	3	3	3	0	0	0	0	0	0	0	0	0	0	0	2
4501020	2	1975	3	4	4	2	1	1	1	1	2	6	6	2	6	3	3	3	2	3	3	3	2	0	0	0	0	0	0	0	0	0	0	0	3
4501002	1	2000	8	1	2	2	4	1	2	2	1	6	2	4	6	3	3	3	3	3	2	3	2	1	0	0	0	0	0	0	0	0	0	0	2
4501008	2	1964	1	2	4	1	3	2								3	4	-1	-1	4	3	-1	2	0	0	0	0	0	0	0	0	0	0	0	2
4501003	1	1990	6	2	4	1	2	1	3	1	1	6	6	4	6	4	2	1	3	2	2	3	2	0	0	0	0	0	0	0	0	0	0	0	2
4501013	1	2002	8	1	2	2	4	1	1	1	1	6	1	4	6	3	4	4	3	3	2	3	2	1	0	0	0	0	0	0	0	0	0	0	2
4501014	2	1967	2	2	4	1	3	1	6	6	4	6	6	6	6	-1	2	3	-1	-1	1	1	2	0	0	0	0	0	0	0	0	0	0	0	3
4501015	1	2002	8	1	4	3	4	1	3	1	1	6	1	4	6	4	4	4	4	3	3	4	3	0	0	0	0	0	0	0	0	0	0	0	2
2110012	1	1997	8	1	2	2	1	1	1	1	1	1	1	1	6	3	3	2	2	2	2	2	2	0	0	0	0	0	0	0	0	0	0	0	2
89221642229294048	2	1984	3	2	4	3	1	1	5	5	3	6	3	5	6	1	2	2	2	2	2	2	2	0	0	0	0	0	0	0	0	0	0	0	3
4447127	2	1981	4	2	4	1	1	1	1	1	1	1	1	4	6	3	2	3	2	3	3	3	2	0	0	0	0	0	0	0	0	0	0	0	3
89741642222016182	2	1972	2	2	4	1	1	1	2	1	1	6	6	6	3	3	2	2	2	3	3	3	2	0	0	0	0	0	0	0	0	0	0	0	2
89751642218579528	2	1982	8	2	4	3	2	1	2	2	2	2	2	2	2	3	3	3	3	3	3	3	3	0	0	0	0	0	0	0	0	0	0	0	2
89221642217149647	2	1975	2	2	4	1	1	1	3	2	2	6	5	4	6	4	3	3	3	3	3	3	3	0	0	0	0	0	0	0	0	0	0	0	2
2113038	2	1966	8	2	4	2	3	1	1	1	2	6	6	6	6	3	3	3	3	2	2	2	2	0	0	0	0	0	0	0	0	0	0	0	2
89741642140918116	2	1986	8	2	1	2	1	1	3	3	2	1	3	2	6	3	3	3	3	3	3	3	3	0	0	0	0	0	0	0	0	0	0	0	3
89191642157569702	1	1966	3	2	4	1	1	1	1	1	1	1	6	2	6	3	3	3	3	3	3	3	3	0	0	1	0	0	0	0	0	0	0	0	1
2112010	2	1967	4	5	4	2	3	2								3	3	3	3	3	4	4	3	0	0	0	0	0	0	0	0	0	0	0	2
89751642139575659	1	2002	7	1	4	1	4	1	4	1	1	6	3	1	5	3	3	4	3	2	3	3	3	0	0	0	0	0	0	0	0	0	0	0	1
2113036	1	1959	4	2	4	2	3	2								3	3	3	2	3	2	2	2	0	0	0	0	0	0	0	0	0	0	0	2
89201642132138510	2	1974	3	2	4	3	1	1	1	1	1	6	4	3	6	2	3	3	3	3	3	3	2	0	0	0	0	0	0	0	1	1	0	0	1
89751642130561693	1	1974	7	2	4	3	1	1	1	1	1	6	5	5	6	3	3	3	3	3	3	3	3	0	0	0	0	0	0	0	1	1	0	0	1
89211642078193909	2	1959	2	2	4	3	3	1	6	5	4	6	6	6	6	3	2	2	3	2	2	3	2	0	0	0	0	0	0	0	0	0	0	0	1
89201642128381149	2	1984	7	2	4	2	2	1	4	1	1	6	1	4	6	2	2	2	2	3	3	2	2	0	0	0	0	0	0	0	0	0	0	0	3
2113034	1	1972	4	2	4	2	1	1	1	1	2	6	5	4	6	4	3	2	3	3	2	2	2	0	0	0	0	0	0	0	0	0	0	0	2
89751642073010986	2	1981	3	2	4	1	1	1	5	1	1	6	6	4	6	3	3	3	3	3	2	3	3	0	0	0	0	0	0	0	0	0	0	0	1
89201642072533138	2	1980	4	2	4	3	1	1	1	1	1	6	4	3	6	3	3	3	3	3	2	2	2	0	0	0	0	0	0	0	0	0	0	0	3
89741642071297332	2	1992	3	2	4	1	3	1	1	1	1	6	1	2	6	2	3	3	2	3	3	3	3	0	0	0	0	0	0	0	0	0	0	0	2
89211642060461487	2	2000	8	2	2	1	1	1	5	2	1	1	2	3	6	3	3	2	3	2	3	3	2	0	0	0	0	0	0	0	0	0	0	0	3
2110009	2	1982	8	1	4	2	1	1	2	2	2	3	3	1	5	4	4	4	3	3	3	3	3	0	0	0	0	0	0	0	0	0	0	0	2
89201642057279604	2	1981	7	2	4	1	2	1	3	3	1	6	6	2	6	3	2	3	3	3	2	2	2	0	0	0	0	0	0	0	1	0	0	0	1
89211642042772613	2	1973	7	2	4	4	3	1	3	1	1	6	2	4	6	3	1	3	3	1	1	2	1	0	0	0	0	0	0	0	0	0	0	0	1
2113030	2	1982	5	2	4	2	1	1	2	1	1	6	6	3	6	1	2	2	2	1	1	2	3	0	0	0	0	0	0	0	0	0	0	0	2
89611641981398542	1	1966	3	2	1	3	1	2								3	3	3	3	3	3	3	3	0	0	0	0	0	0	0	1	1	0	0	1
89381641981235619	2	1958	2	2	4	2	1	2								4	3	3	3	3	3	3	3	0	0	0	0	0	0	0	0	0	0	0	1
89341641975710707	1	1988	5	2	2	2	1	1	4	2	2	3	2	5	6	3	3	3	3	3	3	3	3	0	0	0	0	0	0	0	0	0	0	0	1
89351641975354910	1	1989	3	2	4	2	1	1	1	1	1	1	2	5	6	2	3	3	4	3	4	4	4	0	0	0	0	0	0	0	0	0	0	0	1
4410126	1	1994	5	1	4	3	1	1	2	1	1	6	6	4	6	4	4	4	4	3	3	3	3	0	0	0	0	0	0	0	0	0	0	0	2
444031	2	2003	5	1	4	3	4	1	2	1	1	6	1	3	6	4	3	3	3	3	3	3	3	1	0	0	0	0	0	0	0	0	0	0	3
2108031	2	1993	7	1	1	2	1	1	1	1	1	6	5	2	6	4	4	4	4	4	4	4	4	0	0	0	0	0	0	0	0	0	0	0	1
89391641973182804	2	1967	2	2	4	1	1	2								4	4	4	4	4	4	4	4	0	0	0	0	0	0	0	0	0	0	0	1
89531641972736749	1	2003	6	1	4	1	4	1	1	1	1	6	3	3	6	4	4	4	3	3	3	3	3	0	0	0	0	0	0	0	0	0	0	0	2
89371641434010035	1	1985	3	2	4	1	1	1	3	2	1	6	6	4	6	3	3	3	3	3	3	3	3	0	0	0	0	0	0	0	0	0	0	0	1
89351641432499975	2	1995	4	2	1	2	3	1	1	1	1	6	1	1	6	3	3	3	3	3	3	3	3	0	0	0	0	0	0	0	0	0	0	0	1
89611641971723419	2	1963	3	2	4	1	3	2								3	3	3	3	2	2	3	2	0	0	0	0	0	0	0	0	0	0	0	1
89401641348964477	2	1995	3	2	4	1	1	1	6	1	1	6	6	1	6	3	3	3	3	3	2	3	3	0	0	0	0	0	0	0	0	0	0	0	1
89481641959536576	2	1987	4	2	4	1	3	1	3	1	1	6	4	4	6	4	2	2	2	1	1	1	1	0	0	0	0	0	0	0	0	0	0	0	2
2113029	1	1956	4	2	4	2	3	1	1	3	2	6	6	4	6	3	-1	-1	3	-1	2	3	-1	0	0	0	0	0	0	0	0	0	0	0	2
444003	2	1954	2	2	4	1	3	2								4	-1	-1	-1	-1	-1	-1	-1	0	0	0	0	0	0	0	0	0	0	0	1
2106081	2	1964	2	2	4	1	3	1	3	3	2	6	6	6	6	3	3	3	3	3	3	3	3	0	0	0	0	0	0	0	0	0	0	0	1
2108030	2	1988	8	2	2	1	3	1	1	1	1	1	1	1	6	4	4	4	4	4	4	4	4	1	0	0	0	0	0	0	0	0	0	0	1
89631641961189004	1	1987	3	2	4	1	3	1	1	1	1	6	6	4	6	2	3	3	3	2	2	2	2	0	0	0	0	0	0	0	0	0	0	0	2
89501641960249303	1	1969	3	2	4	1	1	1	4	1	1	6	6	2	6	-1	2	3	3	2	2	3	-1	0	0	0	0	0	0	0	0	1	0	0	2
4438462	1	1969	2	2	4	1	1	1	2	6	1	6	3	4	6	4	4	4	4	3	3	3	2	0	0	0	0	0	0	0	0	0	0	0	1
89161641959143609	2	2003	5	1	4	1	4	1	2	2	1	6	1	3	6	4	4	4	4	3	3	4	3	1	0	0	0	0	0	0	0	0	0	0	2
89521641958137309	2	1976	3	2	4	1	1	2								3	3	3	3	-1	3	3	3	0	0	0	0	0	0	0	0	0	0	0	1
89641641955667693	1	1964	3	2	4	1	1	1	2	2	2	6	6	5	6	3	3	3	2	-1	2	-1	4	0	0	0	0	0	0	0	0	0	0	0	2
444045	1	1982	3	3	4	1	1	1	1	1	1	6	6	3	6	3	2	3	3	-1	1	1	2	0	0	1	0	0	0	0	0	0	0	0	2
89531641953531123	1	1984	3	2	4	1	3	1	2	2	1	6	3	5	6	3	3	3	3	3	3	3	3	0	0	0	0	0	0	0	0	0	0	0	1
444062	1	1958	3	2	4	1	1	2								4	-1	-1	-1	-1	-1	2	-1	0	0	0	0	0	0	0	0	0	0	0	1
2105095	2	1982	7	2	4	2	1	1	1	1	1	1	1	1	1	4	3	3	3	2	3	3	2	0	0	0	0	1	0	0	0	0	0	0	1
2113027	2	1970	4	2	4	2	3	2								3	2	1	1	1	1	1	1	0	0	0	0	0	0	0	0	0	0	0	2
89641641949740509	2	1973	2	2	4	1	1	1	6	2	2	6	6	6	6	3	2	2	3	3	-1	3	-1	0	0	0	0	0	0	0	0	0	0	0	1
89661641949326481	2	1964	3	2	4	1	3	2								3	1	1	2	2	2	3	2	0	0	0	0	0	0	0	0	0	0	0	3
89671641949306418	1	1965	7	2	4	3	1	1	1	4	3	6	4	6	6	3	4	4	4	4	4	4	4	0	0	0	0	0	0	0	0	0	0	0	2
89261641899138291	2	1971	3	2	4	1	3	1	4	1	1	6	4	6	6	3	3	3	4	3	3	3	3	0	0	0	0	0	0	0	0	0	0	0	1
444087	1	1963	2	2	4	2	1	2								4	3	3	3	-1	3	3	-1	0	0	0	0	0	0	0	0	0	0	0	1
4416004	2	1970	3	2	4	1	1	1	3	1	4	6	6	6	6	3	3	3	3	3	3	2	1	0	0	0	0	0	0	0	0	0	0	0	2
4411001	1	1974	3	2	4	1	1	2								3	2	-1	2	1	3	2	2	0	0	0	0	0	0	0	0	0	0	0	1
89501641888117647	2	1958	1	2	4	1	3	2								-1	-1	3	2	2	2	2	2	0	0	0	0	0	0	0	0	0	0	0	1
89591641887965288	1	1987	3	4	4	3	1	1	5	1	1	6	6	2	6	3	3	3	3	3	2	2	3	0	0	0	0	0	0	0	0	0	0	0	1
444088	2	1966	2	2	4	1	1	1	6	2	6	6	6	6	6	-1	3	-1	3	2	-1	3	-1	0	0	0	0	0	0	0	0	0	0	0	1
89271641886031538	2	1996	3	2	4	1	1	1	1	1	1	6	6	3	6	3	4	4	3	2	2	3	2	0	0	0	0	0	0	0	0	0	0	0	2
89531641885973995	2	1957	1	2	4	1	3	2								3	3	3	3	3	2	2	2	0	0	0	0	0	0	0	0	0	0	0	1
89291641885420217	2	1957	1	5	4	1	1	2								3	3	3	3	3	3	3	3	0	0	0	0	0	0	0	0	0	0	0	2
89221641885391476	2	1993	3	2	4	1	1	1	1	2	3	6	6	3	6	3	3	4	4	4	3	4	3	0	0	0	0	0	0	0	0	0	0	0	3
89201641884747582	1	1970	7	2	1	1	1	1	1	3	1	6	2	4	6	3	3	3	3	2	3	-1	2	0	0	0	0	0	0	0	0	0	0	0	3
89261641884772347	2	1986	5	2	4	1	1	1	1	1	4	1	6	4	6	2	1	2	2	3	1	2	1	0	0	0	0	0	0	0	0	0	0	0	2
4411456	1	1977	4	1	4	1	3	2								4	4	4	3	3	3	3	3	0	0	0	0	0	0	0	0	0	0	0	1
2113019	2	1969	4	5	4	2	1	1	1	2	2	3	1	3	5	3	3	3	3	3	3	3	3	0	0	0	0	0	0	0	0	0	0	0	2
4411594	1	1999	7	1	2	1	4	1	1	1	1	2	1	4	6	4	4	4	4	4	4	4	4	0	0	0	0	0	0	0	0	0	0	0	1
444030	2	2000	8	1	1	1	4	1	3	1	1	6	1	4	5	3	3	4	3	2	2	3	1	0	0	0	0	0	0	0	0	0	0	0	2
89191641881653459	1	1967	2	2	4	1	1	1	1	3	1	1	6	4	6	3	3	4	3	3	3	3	3	0	0	0	0	0	0	0	0	0	0	0	3
89741641880369903	1	1971	3	2	4	1	1	1	2	1	1	6	6	4	6	3	3	-1	2	-1	3	1	-1	0	0	0	0	0	0	0	0	0	0	0	2
89211641880009377	2	1958	3	2	4	1	1	1	1	1	1	6	6	6	6	4	3	4	2	3	3	3	3	0	0	0	0	0	0	0	0	0	0	0	2
2113023	2	1956	4	2	4	2	3	2								3	4	3	3	-1	-1	3	3	0	0	0	0	0	0	0	0	0	0	0	2
89261641877798927	1	1981	3	2	4	3	1	1	1	1	1	1	2	3	6	3	3	3	3	3	1	1	1	0	0	0	0	0	0	0	0	0	0	0	3
89191641877459800	1	1968	2	2	4	1	1	1	3	1	1	6	6	3	6	3	3	3	3	3	2	2	3	0	0	0	0	0	0	0	0	0	0	0	3
89641641876241318	2	1974	3	2	4	1	1	1	6	3	1	6	6	5	6	3	2	3	3	3	3	3	3	0	0	0	0	0	0	0	0	0	0	0	1
2113020	1	1964	3	1	4	2	1	2								3	-1	2	1	2	2	2	2	0	0	0	0	0	0	0	0	0	0	0	2
89251641817238903	1	1975	2	4	4	1	1	1	6	6	1	6	6	2	6	3	2	3	4	3	2	3	3	0	0	0	0	1	1	0	0	0	0	0	2
89221641873257998	1	1989	5	2	4	1	1	1	3	1	1	4	3	3	5	3	3	3	3	3	2	3	2	0	0	0	0	0	0	0	0	0	0	0	3
444061	1	1967	4	2	4	1	1	1	1	1	3	2	6	6	6	4	3	-1	-1	2	3	3	2	0	0	0	0	0	0	0	0	0	0	0	1
444032	1	1953	3	2	4	1	3	2								3	3	2	3	3	3	3	3	0	0	0	0	0	0	0	0	0	0	0	1
2113014	2	1999	9	1	2	2	1	1	2	1	1	3	2	1	4	4	4	4	4	4	4	4	4	0	0	0	0	0	0	0	0	0	0	0	2
89401641871165332	2	1958	2	2	4	1	1	1	3	6	1	6	6	6	6	-1	4	4	4	-1	-1	3	1	0	0	0	0	0	0	0	0	0	0	0	1
89161641871001470	2	1961	2	3	4	1	3	1	6	6	2	6	6	6	6	4	1	3	3	3	1	1	1	0	0	0	0	0	0	0	0	0	0	0	2
89351641870832982	2	1996	3	2	4	1	3	2								-1	-1	-1	3	4	-1	-1	3	0	0	0	0	0	0	0	0	0	0	0	3
89511641870344525	1	1960	3	2	4	1	1	2								4	1	-1	1	4	3	1	1	1	1	0	0	0	0	0	0	0	0	0	1
89371641869313524	1	1966	4	2	1	1	1	1	2	2	2	6	1	4	6	3	3	3	3	3	3	3	3	0	0	1	0	0	0	0	1	1	0	0	1
2113009	2	1972	8	2	4	2	1	1	1	1	1	1	1	1	4	4	4	4	4	4	4	4	4	0	0	0	0	0	0	0	0	0	0	0	2
4438110	2	1974	2	2	4	1	3	1	1	1	1	6	6	6	6	4	2	2	2	2	2	-1	2	0	0	0	0	0	0	0	0	0	0	0	2
89281641867594200	1	1991	7	1	4	1	1	1	2	1	1	1	2	1	6	4	4	4	4	4	4	4	4	0	0	0	0	0	0	0	0	0	0	0
4438362	1	1962	2	2	4	1	3	2								-1	3	3	3	3	3	3	3	0	0	1	0	0	0	0	0	0	0	0	1
4416039	1	2001	7	1	2	1	4	1	1	1	1	6	2	5	6	3	3	3	3	3	3	3	2	1	0	0	0	0	0	0	0	0	0	0	2
4416327	1	1958	4	2	4	1	1	2								3	3	4	4	3	3	4	3	0	0	0	0	0	0	0	0	0	0	0	3
89401641866142552	1	1954	2	2	4	1	3	1	2	6	2	6	6	6	6	-1	2	-1	3	3	3	3	2	0	0	0	0	0	0	0	0	0	0	0	1
89381641865908965	1	1954	4	2	4	1	4	2								-1	1	-1	-1	3	2	2	4	1	0	0	0	0	0	0	0	0	0	0	2
4416171	2	1997	5	2	2	1	3	1	2	1	2	6	2	4	6	3	1	4	3	3	1	1	1	0	0	0	0	0	0	0	0	0	0	0	2
4416174	2	1985	1	3	4	1	1	1	6	2	1	6	6	3	6	4	4	1	1	4	4	4	4	0	0	1	0	0	0	0	1	1	0	0	1
4411502	2	1976	7	2	1	1	1	1	1	1	1	6	1	4	6	3	3	3	3	3	3	3	3	0	0	1	0	0	0	0	1	0	0	0	1
89391641807142399	1	1954	4	2	4	3	3	1	1	4	4	6	6	6	6	4	3	-1	2	3	2	-1	3	0	0	0	0	0	0	0	0	0	0	0	3
89351641806868521	2	1961	4	2	4	1	3	2								4	4	4	2	1	-1	1	2	0	0	0	0	0	0	0	0	0	0	0	2
89341641806882918	1	1968	2	4	4	1	2	2								-1	3	3	3	3	3	3	3	0	0	0	0	0	0	0	0	0	0	0	1
89611641806573593	2	1970	3	2	4	1	3	2								4	3	3	4	4	3	3	4	0	0	0	0	0	0	0	0	0	0	0	3
89651641805185796	1	1959	3	2	4	1	1	1	1	6	1	6	1	5	6	-1	3	3	3	3	3	3	2	0	0	0	0	0	0	0	0	0	0	0	2
2113006	2	1971	5	5	4	2	3	2								1	1	1	1	1	1	1	1	0	0	0	0	0	0	0	0	0	0	0	2
89741641801901911	2	1990	3	2	4	1	1	1	1	1	1	6	4	3	6	3	3	3	3	3	3	3	2	0	0	0	0	0	0	0	0	0	0	0	3
89191641801707333	2	1971	2	5	4	1	1	1	4	1	1	1	6	5	6	-1	1	3	2	3	1	2	1	0	0	0	0	0	0	0	0	0	0	0	2
4411583	1	1968	3	2	4	1	3	1	1	3	1	6	6	2	6	3	3	3	3	3	3	2	2	0	0	0	0	0	0	0	0	0	0	0	2
4411324	1	1956	2	2	4	1	1	2								3	3	3	3	3	3	3	3	0	0	0	0	0	0	0	0	0	0	0	3
89351641800848448	1	1957	4	2	1	1	3	2								3	-1	3	3	-1	4	3	2	0	0	0	0	0	0	0	0	0	0	0	1
4411474	1	1952	3	2	4	1	3	2								3	2	-1	2	2	2	2	2	0	0	0	0	0	0	0	0	0	0	0	1
4411206	1	1984	2	2	4	1	1	1	2	1	1	6	1	1	6	3	3	4	3	3	3	3	3	0	0	0	0	0	0	0	0	0	0	0	1
4411543	2	1963	3	2	4	1	1	2								4	3	4	3	3	3	3	3	0	0	0	0	0	0	0	0	0	0	0	1
4416097	2	1981	3	2	4	1	1	2								4	4	4	4	4	4	1	1	0	0	0	0	0	0	0	0	0	0	0	1
4438645	2	1973	3	2	4	1	3	1	6	2	6	6	6	3	6	4	3	1	-1	1	2	2	2	0	0	0	0	0	0	0	0	0	0	0	2
89271641796390630	1	1960	2	1	4	1	1	1	6	6	1	6	6	6	6	3	1	1	3	2	1	2	3	0	0	1	0	1	0	0	1	0	0	0	1
4448175	2	1993	3	2	4	3	1	1	1	1	3	6	3	3	6	2	2	1	2	3	2	1	2	0	0	0	0	0	0	0	0	0	0	0	2
4438659	2	1980	3	2	4	3	1	1	1	1	1	1	3	2	6	3	2	3	2	3	3	3	3	0	0	0	0	0	0	0	0	0	0	0	1
4416058	2	1962	2	2	4	1	1	2								3	2	4	2	2	2	2	2	0	0	0	0	0	0	0	0	0	0	0	1
89641641793917399	1	1962	4	2	4	1	3	1	1	1	6	6	6	5	6	4	3	3	3	3	4	3	-1	1	0	0	0	0	0	0	0	0	0	0	1
2105096	2	1970	4	2	4	2	3	1	1	6	1	6	6	4	6	3	3	3	2	2	3	3	2	0	0	0	0	0	0	0	0	0	0	0	2
4448173	2	1974	3	2	4	1	1	1	4	3	2	6	6	4	6	3	3	3	3	3	3	3	3	0	0	0	0	0	0	0	0	0	0	0	2
4438016	1	1971	3	2	4	1	1	2								3	-1	2	3	2	2	2	1	0	0	0	0	0	0	0	0	0	0	0	1
4438448	2	1962	2	5	4	1	3	2								3	2	-1	3	3	3	-1	-1	0	0	0	0	0	0	0	0	0	0	0	2
4439045	2	2002	7	1	2	1	4	1	2	1	1	6	2	3	6	3	3	3	3	3	3	3	3	1	0	0	0	0	0	0	0	0	0	0	2
4411479	1	1967	7	2	1	1	1	1	1	1	1	6	1	3	1	3	3	3	3	3	3	3	3	0	0	0	0	0	0	0	0	0	0	0	1
89591641785501869	2	1986	3	2	4	3	1	1	5	1	1	6	1	3	6	3	3	3	3	3	3	3	3	0	0	0	0	0	0	0	0	0	0	0	1
4411666	1	1970	3	2	4	1	1	1	3	5	1	6	6	6	6	2	2	-1	-1	-1	3	3	3	0	0	0	0	0	0	0	0	0	0	0	1
4448119	1	1968	3	2	4	1	1	1	1	1	3	6	6	4	6	3	3	3	3	2	3	3	1	0	0	0	0	0	0	0	0	0	0	0	3
4448132	2	1986	3	2	4	1	1	2								4	3	3	3	3	2	3	3	0	0	0	0	0	0	0	0	0	0	0	3
4416048	1	1983	3	2	4	1	1	1	1	1	1	6	6	3	6	3	3	3	3	3	3	3	3	0	0	1	0	0	0	0	1	0	0	0	1
89591641781984611	1	1967	2	2	4	1	1	2								3	3	3	3	-1	3	3	3	0	0	0	0	0	0	0	0	0	0	0	1
89611641780924807	1	1954	2	2	4	1	3	2								3	2	3	3	3	3	3	3	0	0	0	0	0	0	0	0	0	0	0	1
4416131	1	1969	2	2	4	1	1	2								1	1	1	1	1	1	2	2	0	0	0	0	0	0	0	0	0	0	0	2
4416095	2	1964	2	2	4	1	3	2								4	4	4	3	3	3	3	3	0	0	0	0	0	0	0	0	0	0	0	1
4416165	1	1965	3	2	4	1	2	1	1	1	1	6	5	6	6	3	3	3	3	3	1	2	1	0	0	0	0	0	0	0	0	0	0	0	1
4416082	1	1982	5	2	4	1	2	1	1	1	1	6	6	4	6	-1	4	4	3	3	3	-1	3	0	0	0	0	0	0	0	0	0	0	0	2
4416122	1	1961	4	2	1	1	1	1	4	6	3	6	6	6	6	4	4	3	4	3	2	2	3	0	0	0	0	0	0	0	0	0	0	0	1
2108022	2	1962	3	2	4	1	3	2								3	3	3	3	3	3	3	2	0	0	0	0	0	0	0	0	0	0	0	1
89501641731316107	1	1980	3	2	4	1	3	1	5	1	1	6	6	6	6	-1	4	3	3	2	3	3	3	0	0	0	0	0	0	0	0	0	0	0	1
89441641696559212	1	1981	4	2	4	2	3	1	1	1	1	1	2	2	3	3	3	3	2	3	3	3	3	0	0	0	0	0	0	0	0	0	0	0	2
89351641716147726	1	1965	3	2	4	1	2	1	3	6	3	6	6	5	6	3	3	3	3	3	3	3	3	0	0	0	0	0	0	0	0	0	0	0	1
89371641725352424	1	1962	3	2	4	1	1	2								2	3	3	2	3	2	3	-1	0	0	0	0	0	0	0	0	0	0	0	1
89531641722620981	1	1965	3	2	4	1	3	1	6	6	1	6	6	5	6	3	3	3	3	2	1	3	1	0	0	0	0	0	0	0	0	0	0	0	1
89351641722129012	1	1963	3	2	4	1	2	2								3	3	3	3	2	2	3	2	0	0	0	0	0	0	0	0	0	0	0	1
89471641721550377	1	1962	3	2	4	3	3	2								-1	-1	3	3	3	3	3	3	0	0	0	0	0	0	0	0	0	0	0	1
2113008	2	1989	4	1	4	2	1	1	2	2	2	2	2	2	2	3	3	2	2	2	2	2	2	0	0	0	0	0	0	0	0	0	0	0	2
4402126	2	1969	7	2	4	3	1	1	1	2	1	1	5	4	6	3	3	3	3	2	2	3	2	0	0	0	0	0	0	0	0	0	0	0	2
4439128	1	1972	3	2	4	1	1	1	1	1	2	6	6	2	6	4	-1	3	-1	3	2	2	-1	0	0	0	0	0	0	0	0	0	0	0	1
89421641713638799	2	1973	2	2	4	1	1	2								3	3	3	3	3	3	3	3	0	0	0	0	0	0	0	0	0	0	0	2
89441641713414826	2	2000	8	1	2	3	4	1	2	1	1	1	1	3	6	3	3	3	3	3	3	3	3	0	0	0	0	0	0	0	0	0	0	0
89401641713702287	1	1968	3	2	4	1	3	1	1	1	1	6	6	4	6	1	1	1	-1	3	3	4	1	1	0	0	0	0	0	0	0	0	0	0	1
89371641712998027	2	1980	3	2	4	1	1	1	6	6	3	1	6	6	6	3	3	3	3	3	3	2	2	0	0	0	0	0	0	0	0	0	0	0	1
89381641712221781	2	1957	3	5	4	1	3	2								4	4	4	4	4	4	4	4	0	0	0	0	0	0	0	0	0	0	0	1
4439005	1	1982	3	2	4	1	1	1	1	1	1	1	1	5	6	4	4	4	4	3	4	4	3	0	0	0	0	0	0	0	0	1	0	0	1
89351641709891597	1	1971	2	2	4	1	3	2								3	2	3	3	3	3	3	3	0	0	0	0	0	0	0	0	0	0	0	1
4439006	1	1979	3	2	4	1	1	1	1	1	3	6	4	2	6	3	3	3	3	3	3	2	3	1	0	0	0	0	0	0	0	0	0	0	1
89371641633969168	1	1965	3	2	4	1	1	1	6	6	6	1	6	6	6	-1	4	4	-1	2	2	3	2	0	0	0	0	0	0	0	0	0	0	0	1
89511641709126717	2	1982	3	3	4	1	3	1	3	2	4	6	3	5	6	3	2	3	2	3	3	3	3	0	0	0	0	0	0	0	0	0	0	0	1
89751641706743866	1	1963	2	2	4	1	2	2								3	3	3	3	3	4	2	2	0	0	0	0	0	0	0	1	0	0	0	3
4439022	1	1969	2	2	4	1	2	1	1	1	1	6	6	2	6	-1	2	2	2	2	-1	-1	2	0	0	0	0	0	0	0	0	0	0	0	1
2106125	1	1983	3	2	4	1	3	1	5	1	1	6	6	6	6	3	2	2	3	3	3	2	1	0	0	0	0	0	0	0	0	0	0	0	1
89741641705074976	2	1986	3	2	4	1	3	1	5	1	1	3	2	2	6	4	3	3	3	3	3	3	3	0	0	0	0	0	0	0	0	0	0	0	2
89191641701198720	2	1987	1	2	4	1	1	1	1	1	1	6	6	4	6	-1	2	3	2	2	2	3	2	0	0	0	0	0	0	0	0	0	0	0	3
2113021	2	1981	8	2	4	2	1	1	1	1	1	6	2	2	6	-1	-1	-1	-1	-1	-1	3	3	0	0	0	0	0	0	0	0	0	0	0	2
4439076	2	1970	2	2	4	1	1	1	6	2	2	6	6	6	6	4	1	4	1	3	3	1	1	0	0	0	0	0	0	0	0	0	0	0	2
2108020	2	1992	4	2	4	1	3	1	5	2	1	6	2	2	6	4	3	3	3	3	3	3	3	0	0	0	0	0	0	0	0	0	0	0	1
4439124	2	1962	2	2	4	1	3	1	6	2	3	6	6	6	6	3	2	2	2	2	2	3	2	0	0	0	0	0	0	0	0	0	0	0	1
4414233	2	1957	2	2	4	1	3	2								-1	3	1	2	2	3	4	-1	0	0	1	0	0	1	1	1	0	0	0	1
89641641696566891	2	1970	2	2	4	1	3	2								3	4	4	3	3	-1	3	-1	0	0	0	0	0	0	0	0	0	0	0	1
89331641695871081	1	1953	2	5	4	1	3	1	1	6	1	6	6	6	6	3	3	2	4	3	1	1	2	0	0	0	0	0	0	0	0	0	0	0	1
4435508	1	1994	4	1	4	1	1	1	2	1	1	1	2	4	3	2	2	3	2	3	2	2	2	0	0	0	0	0	0	0	0	0	0	0
89381641695598830	1	1983	4	1	4	1	1	1	1	1	1	6	6	4	6	3	3	3	3	3	3	3	3	0	0	0	0	0	0	0	0	0	0	0	1
4439062	1	1954	3	2	4	1	2	1	6	6	2	6	6	6	6	4	-1	1	1	-1	1	1	1	0	0	1	0	0	0	0	0	0	0	0	1
89751641627144806	1	1955	3	5	4	1	3	2								4	4	4	3	3	4	2	4	0	0	0	0	0	0	0	1	0	0	0	3
2106071	2	1959	2	5	4	1	3	2								-1	-1	-1	-1	-1	-1	1	1	0	0	0	0	0	0	0	0	0	0	0	1
89511641694780374	1	1977	8	2	1	2	1	1	2	2	5	1	2	5	6	4	3	3	3	3	1	2	2	0	0	0	0	0	0	0	0	0	0	0	3
2108017	2	1985	3	4	4	1	3	1	6	6	1	6	6	3	6	3	3	3	3	3	3	3	3	0	0	0	0	0	0	0	0	0	0	0	1
89371641694729404	1	1964	5	2	4	2	1	1	1	6	6	6	6	3	1	3	3	3	2	3	2	1	2	0	0	0	0	0	0	0	0	0	0	0	3
4402132	2	1958	1	2	4	3	3	2								4	4	4	4	4	4	-1	4	0	0	0	0	0	0	0	0	0	0	0	2
89511641693695487	1	1986	2	2	4	1	3	1	3	1	1	6	6	4	6	3	1	4	3	3	1	3	1	0	0	0	0	0	0	0	0	0	0	0	2
89441641693414140	2	1959	2	2	4	3	3	2								3	3	3	3	3	2	2	3	0	0	0	0	0	0	0	0	0	0	0	2
89531641693686904	2	1970	1	2	4	1	3	1	5	3	3	6	6	5	6	-1	3	-1	2	2	1	-1	2	0	0	0	0	0	0	0	0	0	0	0	1
89651641693130267	1	1962	4	2	4	1	3	2								4	2	4	4	4	1	1	-1	0	0	0	0	0	0	0	0	0	0	0	2
4439129	2	1976	2	2	4	1	1	1	5	2	1	6	6	5	6	3	2	-1	3	3	3	3	2	0	0	0	0	0	0	0	0	0	0	0	1
4439074	2	1967	2	2	4	1	1	1	6	3	1	6	6	6	6	4	4	4	4	2	3	4	4	0	0	0	0	0	0	0	0	0	0	0	1
4414060	2	1959	3	2	1	1	1	2								3	3	3	3	3	3	2	3	0	0	0	0	0	0	0	1	0	0	0	1
4412014	2	1954	3	5	4	1	3	2								3	4	3	3	3	2	-1	3	0	0	0	0	0	0	0	1	0	0	0	1
89121641691781768	1	1960	3	2	4	1	3	2								4	4	4	4	4	4	4	4	0	0	0	0	0	0	0	0	0	0	0	1
4402142	1	1953	3	2	2	2	3	1	1	1	1	6	2	2	6	4	3	3	3	3	1	3	3	0	0	0	0	0	0	0	0	0	0	0	2
89421641642733288	2	1997	5	1	2	3	1	1	4	1	2	1	3	1	6	3	2	1	3	3	2	2	2	0	0	0	0	0	0	0	0	0	1	0	2
89741641635918313	2	1987	3	2	4	1	1	1	4	1	2	2	6	3	6	3	3	3	3	3	3	2	3	0	0	0	0	0	0	0	0	0	0	0	2
4412148	1	1953	7	2	4	2	1	1	3	2	1	6	6	2	6	3	3	3	3	3	3	3	3	0	0	0	0	0	0	0	0	0	0	0	3
4406063	1	1988	8	2	4	1	1	1	3	3	3	3	3	3	3	4	4	4	4	4	4	4	4	0	0	0	0	0	0	0	0	0	0	0	1
89631641634030782	1	1965	3	2	1	1	1	1	2	3	2	3	5	3	6	3	3	3	3	2	3	3	3	1	0	0	0	0	0	0	0	0	0	0	1
89161641633410784	2	1959	2	2	4	1	3	2								4	4	4	4	4	3	4	4	0	0	1	0	0	0	0	0	0	0	0	1
89351641633228398	1	1969	8	2	1	1	1	2								4	2	-1	-1	1	2	3	2	0	0	0	0	0	0	0	0	0	0	0	1
4406051	2	1987	3	2	4	1	1	1	6	1	1	6	6	2	6	3	3	3	3	3	3	3	3	0	0	0	0	0	0	0	0	0	0	0	3
4412011	2	1961	3	2	4	1	3	2								4	4	4	4	3	3	3	3	0	0	0	0	0	0	0	0	0	0	0	1
4402116	2	1991	4	2	4	3	3	1	1	1	1	3	2	3	6	3	2	2	3	2	2	2	2	0	0	0	0	0	0	0	0	0	0	0	3
89751641621682591	1	1985	3	1	4	1	3	1	1	1	1	6	4	5	6	3	1	1	1	3	2	2	1	0	0	1	0	0	0	1	0	0	0	1	3
2113005	2	1969	7	4	4	2	1	1	1	1	2	2	6	2	6	3	3	3	2	2	2	2	2	0	0	0	0	0	0	0	0	0	0	0	2
89681641630588503	2	1974	5	2	1	1	1	1	1	2	1	6	1	3	6	4	4	4	4	3	4	4	3	1	0	1	0	0	0	0	1	1	0	1	1
4406043	1	1966	3	2	4	1	3	2								3	3	4	3	3	3	3	3	0	0	0	0	0	0	0	0	0	0	0	1
4406050	2	1954	3	2	4	1	3	2								3	2	2	2	2	2	1	1	0	0	0	0	0	0	0	0	0	0	0	1
4406052	2	1993	8	2	4	1	1	1	3	1	1	6	1	4	5	3	3	3	3	3	3	3	3	0	0	0	0	0	0	0	0	1	0	0	1
89371641627667135	2	1986	3	2	4	1	1	1	6	2	2	6	6	2	6	3	3	3	3	3	3	3	3	0	0	0	0	0	0	0	0	0	0	0	1
4412115	1	1997	4	1	4	1	3	1	2	2	2	2	2	2	6	1	3	3	3	2	2	2	1	0	0	0	0	0	0	0	0	1	0	0	1
89271641627136892	2	1969	3	3	4	1	1	2								4	3	2	2	2	2	2	2	0	0	0	0	0	0	0	0	0	0	0	1
89361641626962451	2	1965	2	2	4	1	3	2								3	3	3	3	3	3	3	3	0	0	0	0	0	0	0	0	0	0	0	3
4412313	2	1985	5	2	4	1	1	1	5	2	2	1	3	4	6	3	2	3	3	2	2	3	2	0	0	0	0	0	0	0	0	0	0	0	1
89461641626051231	2	1983	7	2	2	3	3	1	1	1	1	1	1	1	1	4	4	4	4	4	4	4	4	0	0	0	0	0	0	0	0	0	0	0	2
4406028	2	1955	1	5	4	1	3	2								4	4	4	4	4	4	4	4	0	0	0	0	0	0	0	0	0	0	0	1
89651641625822134	1	1967	2	2	4	1	3	1	5	2	2	6	6	6	6	4	4	4	4	4	4	4	4	0	0	0	0	0	0	0	0	0	0	0
4402127	1	1995	8	1	4	2	1	1	1	2	1	1	3	2	2	4	3	3	3	3	3	3	2	1	0	1	0	0	0	0	0	0	0	0	2
4435723	1	1977	8	2	1	3	1	1	1	1	1	6	1	1	1	3	2	3	3	2	2	2	2	0	0	0	0	0	0	0	0	0	0	0	1
89161641624282937	2	1997	5	1	4	1	1	1	1	1	1	6	1	2	6	4	2	3	3	1	3	3	2	0	0	0	1	0	0	0	0	0	0	0	3
2113004	2	1970	3	2	4	2	3	2								-1	3	2	2	2	-1	1	3	0	0	0	0	0	0	0	0	0	0	0	2
89641641623955600	2	1969	1	2	4	1	1	2								3	-1	3	3	3	3	2	2	0	0	0	0	0	0	0	0	0	0	0	1
89331641623333431	2	1962	2	2	4	1	1	1	1	1	3	6	6	5	6	4	2	-1	3	3	4	2	-1	0	0	0	0	0	0	0	0	0	0	0	2
4406071	1	1975	3	2	4	1	1	1	1	1	1	6	6	3	6	3	3	3	3	3	2	3	3	0	0	0	0	0	0	0	0	0	0	0	1
89671641620771473	1	1953	2	2	4	1	3	2								3	2	2	4	-1	2	2	-1	0	0	0	0	0	0	0	0	0	0	0	2
89661641614580701	1	1962	4	2	1	1	1	1	1	6	1	1	6	6	6	3	3	2	2	2	2	3	2	0	0	1	0	0	0	0	0	0	0	0	1
89291641621337507	1	1956	2	2	4	1	1	2								-1	2	2	3	1	3	4	3	0	0	0	0	0	0	0	0	0	0	0	1
4435003	1	1963	4	2	4	1	3	1	2	2	2	6	6	4	6	-1	1	-1	1	1	1	1	1	0	0	0	0	0	0	1	0	0	0	0	2
4414012	2	1958	2	2	4	1	2	2								3	3	3	3	3	3	3	2	0	0	0	0	0	0	0	0	0	0	0	2
89191641565479561	2	1971	2	2	4	1	1	1	3	3	1	3	3	4	6	2	-1	3	2	2	2	2	2	0	0	0	0	0	0	0	0	0	0	0	2
89741641619158875	2	1999	3	2	4	1	3	1	5	3	1	5	5	2	6	4	2	2	3	2	2	3	2	1	0	0	0	0	0	0	0	0	0	0	2
89601641616477714	1	1989	8	2	4	1	1	1	1	1	1	1	1	1	1	3	2	3	3	4	3	4	3	0	0	0	0	0	0	0	0	1	0	0	1
4406038	1	1973	2	4	4	1	1	2								2	2	2	2	2	2	2	2	0	0	0	0	0	0	0	0	0	0	0	3
89591641614360099	2	1956	2	2	4	1	3	2								-1	3	2	3	3	3	3	2	0	0	0	0	0	0	0	0	1	0	0	1
89351641613159116	2	1964	2	2	4	1	2	2								4	1	4	1	4	-1	2	4	0	0	0	0	0	0	0	0	0	0	0	1
89271641611899858	2	1957	3	5	2	1	3	1	1	1	1	6	6	6	6	3	3	-1	2	3	3	1	1	0	0	0	0	0	0	0	0	0	0	0	1
4414086	2	1966	2	5	4	1	3	2								3	2	3	2	2	1	3	1	0	0	0	0	0	0	0	0	0	0	0	1
4402153	1	1982	7	2	4	3	3	1	1	1	1	2	6	2	2	4	2	3	2	3	2	1	3	0	0	0	0	0	0	0	0	0	0	0	2
89131641611061270	1	1958	4	2	4	3	3	1	1	1	1	1	2	1	1	3	2	3	3	2	2	3	3	0	0	0	0	0	0	0	0	0	0	0	2
4406019	2	1983	3	2	4	3	3	1	1	1	1	6	3	2	5	4	3	3	3	2	2	1	1	1	1	0	0	0	0	0	0	0	0	0	2
89401641610941391	2	1964	2	2	4	1	1	2								3	3	3	3	3	3	3	3	0	0	0	0	0	0	0	0	0	0	0	1
89751641609373619	1	1982	3	2	4	1	2	1	3	2	5	6	6	3	6	3	3	3	3	3	3	3	3	0	0	0	0	0	0	0	1	0	0	0	2
89581641610515544	1	1970	4	2	1	1	1	1	3	2	1	2	4	5	6	3	3	3	2	3	2	3	2	0	0	0	1	0	0	0	0	1	0	0	1
4406066	2	1996	8	1	1	1	1	1	1	1	1	6	5	2	5	3	3	3	3	3	3	3	3	0	0	0	0	0	0	0	0	0	0	0	1
4406063Rp8955	2	1969	2	2	4	1	1	2								3	3	3	1	2	2	1	1	0	0	0	0	0	0	0	0	0	0	0	1
89641641609154313	2	1964	3	2	4	1	3	2								-1	-1	-1	3	3	-1	3	-1	0	0	0	0	0	0	0	0	0	0	0	1
2113001	1	1980	5	2	4	2	1	1	1	1	1	1	1	1	6	3	3	3	3	3	3	3	3	0	0	0	0	0	0	0	0	0	0	1	1
4406010	2	1959	2	2	4	1	3	1	6	6	1	6	6	6	6	3	3	3	3	3	1	1	1	0	0	0	0	0	0	0	0	0	0	0	1
4412157	2	1984	3	2	4	2	3	1	2	1	2	5	1	4	6	3	3	3	3	3	3	3	3	0	0	1	0	0	0	0	0	0	0	0	3
4412384	2	1985	3	2	4	1	1	1	3	2	1	1	5	2	6	3	3	3	2	3	3	3	2	0	0	0	0	0	0	0	0	0	0	0	1
89621641607770136	1	1965	3	2	1	1	3	1	1	1	1	6	6	6	6	3	3	3	2	3	-1	2	2	0	0	1	0	0	0	0	0	0	0	0	1
89611641606953102	2	1962	2	2	4	1	3	1	1	1	1	6	6	5	6	3	3	3	3	3	3	3	3	0	0	0	0	0	0	0	0	0	0	0	1
89191641546747846	2	1980	3	2	4	1	3	1	2	1	1	4	2	3	6	4	4	4	4	3	3	4	3	0	0	0	0	0	0	0	0	0	0	0	3
4412518	2	1972	1	2	4	1	3	1	2	2	3	5	6	6	6	3	3	3	4	4	4	3	3	0	0	0	0	0	0	0	0	0	0	0	1
89681641605467525	1	1968	2	2	4	1	3	2								3	3	3	2	3	3	3	-1	1	0	0	0	0	0	0	0	0	0	0	1
4435561	1	1963	3	2	4	1	1	1	2	1	6	6	6	6	6	4	3	2	3	3	-1	3	3	0	0	0	0	0	0	0	0	0	0	0	1
89751641522729815	2	1986	3	2	4	1	1	1	4	3	1	1	4	3	6	3	3	3	3	3	3	3	3	0	0	0	0	0	0	0	0	0	0	0	2
89701641559863747	2	1982	3	2	4	1	3	1	6	1	1	2	6	4	6	4	4	4	2	3	4	4	2	0	0	0	0	0	0	0	0	0	0	0	1
4402174	1	1987	9	2	1	2	1	1	1	1	1	1	1	1	1	4	3	3	2	2	2	3	2	0	0	1	0	0	1	0	0	0	0	0	2
4402178	1	1993	5	2	4	1	1	1	1	1	1	6	6	2	6	4	4	4	3	4	4	4	4	0	0	0	0	0	0	0	0	0	0	0	2
89511641552983064	1	1978	3	2	4	1	1	1	1	2	1	1	1	4	6	3	3	3	2	3	3	2	3	0	0	0	0	0	0	0	1	0	0	0	1
4402112	1	1979	5	2	4	3	1	1	1	1	1	1	2	4	6	4	3	3	3	3	2	3	3	0	0	0	0	0	0	0	0	0	0	0	2
4444153	2	1970	2	2	4	1	3	2								2	2	2	2	2	2	2	2	0	0	0	0	0	0	0	0	0	0	0	3
89501641555944818	2	1977	4	2	4	2	1	1	2	2	1	6	3	3	6	3	-1	3	3	3	2	3	2	0	0	0	1	0	0	1	0	0	0	0
4444143Rp8972	2	1959	3	2	4	3	3	2								-1	2	-1	2	-1	-1	2	2	0	0	0	0	0	0	0	0	0	0	0	2
89481641555024899	1	1975	8	2	4	3	1	1	1	4	2	2	2	5	6	4	4	3	3	3	3	3	3	1	0	0	0	0	0	0	0	0	0	0	2
89491641552982231	2	1984	3	2	4	1	3	1	1	4	1	6	1	2	6	4	2	3	3	2	3	3	3	0	1	0	0	0	0	0	0	0	0	0	2
4443156	1	1984	2	2	4	1	1	1	3	1	1	6	5	4	2	4	4	3	3	3	2	3	2	0	0	0	0	0	0	0	0	0	0	0	2
89501641548641214	2	1967	3	2	4	1	3	1	6	1	1	6	6	6	6	3	-1	-1	2	3	2	-1	2	0	0	0	0	0	0	0	0	0	0	0
4444141	2	1978	3	2	4	1	3	1	2	1	1	6	5	5	6	3	3	3	3	3	3	1	2	0	0	0	0	0	0	0	0	0	0	0	2
89531641523160728	2	1991	7	2	4	1	3	1	1	1	5	6	6	2	6	4	3	3	3	2	2	2	2	0	0	0	0	0	0	0	0	0	0	0	2
89721641546073041	2	1960	2	2	4	2	3	2								3	1	2	3	3	3	3	2	0	0	0	0	0	0	0	0	0	0	0	1
4444174	1	1977	3	2	1	1	1	1	1	4	2	6	1	6	6	3	4	4	4	4	3	4	3	0	0	0	0	0	0	0	1	1	0	0	3
4414133	2	1965	2	2	4	1	2	2								4	3	3	3	3	3	3	1	0	0	0	0	0	0	0	0	1	0	0	1
89751641542141418	2	2003	8	1	2	1	4	1	1	1	1	6	1	4	6	3	3	3	3	3	3	3	3	1	0	0	0	0	0	0	0	1	0	0	2
4414081	1	1954	3	2	4	1	1	2								3	2	2	3	2	3	3	3	0	0	0	0	0	0	0	0	0	0	0	1
4443182	2	1964	2	2	1	1	3	2								4	4	4	2	3	-1	2	3	0	0	0	0	0	0	0	0	0	0	0	1
4444116	2	1957	2	2	4	3	3	2								4	4	4	4	4	2	3	4	0	0	0	0	0	0	1	0	0	0	0	1
4444184	2	1998	5	6	4	3	1	1	5	2	1	5	5	2	6	3	3	3	3	3	3	3	3	0	0	0	0	0	0	0	0	0	0	0
4414005	1	1966	3	1	4	1	1	2								3	3	-1	1	3	3	2	2	0	0	0	0	0	0	0	0	0	0	0	1
4444160	2	1984	4	2	4	3	3	1	1	1	1	6	6	1	6	-1	3	3	3	-1	3	3	2	0	0	0	0	0	0	0	0	0	0	0	2
4444138	1	1986	5	2	4	3	1	1	1	1	1	1	1	1	1	-1	2	4	4	4	4	4	1	1	0	0	0	0	0	0	0	0	0	0	2
89191641522457954	2	1983	3	2	4	1	3	1	3	1	2	6	3	6	6	3	3	3	3	3	3	3	2	0	0	0	0	0	0	0	0	0	0	0	2
89271641533432705	2	1972	1	2	4	1	1	2								4	2	3	4	4	4	4	1	0	0	0	0	0	0	0	0	0	0	0	1
4414039	1	1989	3	2	4	1	3	1	1	4	1	6	1	1	6	4	3	4	4	3	1	4	2	0	0	0	0	0	0	0	0	0	0	0	1
4414252	2	1965	2	2	4	1	1	1	1	3	2	4	6	5	6	4	4	4	4	2	2	3	2	0	0	0	0	0	0	0	0	0	0	0	2
4443190	1	1988	3	1	4	3	2	1	3	1	1	6	6	3	6	3	3	4	3	3	3	3	3	0	0	0	0	0	0	0	1	0	1	0	3
89191641527085024	2	1993	3	2	4	1	3	1	1	1	1	6	2	3	6	3	3	3	3	2	3	2	3	0	0	0	0	0	0	0	0	0	0	0	2
89741641525674900	2	1969	3	2	4	3	1	1	3	1	1	4	5	4	6	3	4	3	3	3	2	3	2	0	0	0	0	0	0	0	0	0	0	0	2
4444135	1	1964	2	-2	4	1	3	2								-1	1	4	2	2	3	2	1	0	0	1	0	0	0	1	0	0	0	0	1
4444145	2	1998	4	2	4	1	3	1	2	2	1	6	6	2	6	3	3	3	3	3	3	3	3	0	0	0	0	0	0	0	0	0	0	0	1
4414007	1	1955	4	2	4	1	1	1	3	1	4	6	4	6	6	4	2	3	2	1	1	4	2	0	0	0	0	0	0	0	0	0	0	0	1
4414101	1	1962	3	2	4	1	1	2								3	1	2	2	-1	2	1	1	0	0	0	0	0	0	0	0	0	0	0	1
4444150	2	1965	2	2	4	3	3	2								3	3	3	2	3	3	3	3	0	0	0	0	0	0	0	0	0	0	0	2
4444164	2	1987	3	2	4	1	3	1	1	1	1	6	6	5	6	-1	3	2	2	2	2	-1	2	0	0	0	0	0	0	0	0	0	0	0	2
89421641472987654	1	1984	7	2	4	3	1	1	6	1	1	1	2	2	4	1	1	1	1	2	1	1	1	0	0	0	0	0	0	0	0	0	0	0	2
4413132	2	1964	2	2	4	1	3	2								2	3	1	3	3	4	3	1	0	0	0	0	0	0	0	0	0	0	0	2
89511641469662835	2	1970	7	2	4	3	1	1	2	2	2	6	2	4	6	3	3	3	3	3	3	3	3	0	0	0	0	0	0	0	0	0	0	0	2
89491641469608420	1	1982	3	2	4	1	2	1	1	1	2	2	2	2	6	2	3	3	2	2	2	2	3	1	0	0	0	0	0	0	1	0	0	0	2
89501641469860589	2	1963	2	2	4	1	1	2								-1	-1	-1	-1	-1	-1	2	-1	0	0	0	0	0	0	0	0	0	0	0
89471641437443744	2	1996	7	1	2	3	1	1	1	2	1	1	1	3	4	4	3	2	2	1	1	4	1	0	0	1	0	0	0	0	0	0	0	1	2
4404190	2	1986	8	1	4	2	1	1	2	2	1	1	2	1	1	4	3	3	3	2	2	4	3	0	0	0	1	0	0	0	0	1	0	0	2
89451641436886506	1	1984	5	2	4	3	1	1	2	2	2	2	6	2	6	3	3	3	3	3	3	3	3	0	0	0	0	0	0	0	0	0	0	0	2
89531641466226265	1	1989	7	2	4	1	1	1	1	2	1	2	3	2	5	3	3	3	3	3	3	3	3	0	0	0	0	0	0	0	0	0	0	0	2
89541641445863247	1	2002	8	1	4	3	4	1	2	1	2	6	2	3	6	2	3	3	3	2	2	3	3	1	0	0	0	0	0	0	0	0	0	0	2
89491641369603149	1	1991	3	2	4	1	1	1	1	1	2	1	1	3	6	3	3	4	3	3	3	3	2	0	0	0	0	0	0	0	0	0	0	0	2
4404164	2	1978	1	2	4	1	1	1	6	5	1	1	6	4	6	3	3	-1	2	3	3	4	-1	0	0	0	0	0	0	0	0	0	0	0	2
4404132	1	1954	7	2	1	3	3	1	2	2	6	6	6	6	6	3	3	3	3	3	3	3	3	0	0	0	0	0	0	0	0	0	0	0	2
89461641454259667	1	1997	7	1	2	3	3	1	1	6	2	3	4	6	6	4	3	3	3	3	3	3	3	0	0	0	0	0	0	0	0	0	0	0	2
89421641371360725	2	1986	3	2	4	1	3	1	1	1	1	1	1	1	1	3	3	3	3	3	3	3	3	0	0	0	0	0	0	0	0	0	0	0	2
4404156	2	1953	3	2	1	3	3	1	6	3	1	6	6	6	6	2	3	3	3	3	2	2	2	0	0	0	0	0	0	0	0	0	0	0	2
89331641443056903	2	1964	4	2	1	3	1	1	1	3	1	1	1	5	6	3	3	3	3	3	3	2	3	1	0	0	0	0	0	0	0	0	0	0	2
4442145	2	1995	5	2	4	1	3	1	4	1	1	6	3	4	6	3	2	4	2	2	1	2	1	0	0	0	0	0	0	0	0	0	0	0	2
89611641441013739	1	1952	3	2	4	3	3	2								-1	-1	-1	-1	-1	-1	-1	-1	0	0	0	0	0	0	0	0	0	0	0	2
89671641434574139	2	1983	1	2	4	1	3	2								4	1	-1	3	-1	1	1	4	0	0	0	0	0	0	0	0	0	0	0	2
89551641440561119	1	1992	3	1	4	1	1	1	3	1	1	6	6	3	6	4	2	2	3	3	2	3	2	0	0	0	0	0	0	1	0	0	0	0
89321641357043072	2	2001	7	1	2	1	4	1	3	2	1	2	3	3	6	3	3	3	3	2	2	2	2	1	0	0	0	0	0	0	0	0	0	0	2
4433315	2	1973	2	2	4	1	3	2								-1	3	3	2	-1	-1	3	2	0	0	0	0	0	0	0	0	0	0	0	1
89301641438635222	2	1966	2	3	4	3	3	1	1	6	1	6	6	6	6	2	2	2	2	2	-1	1	3	0	0	0	0	0	0	0	0	1	0	0	2
89401641437530975	1	1956	3	2	4	1	1	2								1	1	1	1	1	1	1	1	0	0	0	0	0	0	0	0	0	0	0	2
89671641437188500	2	1984	7	2	4	1	1	1	3	5	4	6	2	2	6	4	3	3	3	3	3	4	3	0	0	0	0	0	0	0	0	0	0	0	1
89461641371651337	2	1952	1	2	1	3	3	2								-1	2	2	3	-1	3	3	4	0	0	0	0	0	0	0	0	0	0	0	2
4413160	2	1988	3	2	4	2	3	1	1	3	3	6	6	2	6	4	3	3	3	3	3	3	3	0	0	0	0	0	0	1	0	0	0	0	2
4407237	2	1970	3	2	4	3	1	1	5	3	3	6	6	4	5	3	3	3	3	3	3	3	3	0	0	0	0	0	0	0	0	0	0	0	1
4404143	2	1957	3	2	4	3	3	1	1	4	2	6	6	6	6	3	3	3	4	2	1	2	1	0	0	0	0	0	0	0	0	0	0	0	2
89681641433494261	1	1953	4	2	4	1	3	1	2	2	2	6	6	6	6	2	2	-1	2	-1	2	4	2	0	0	0	0	0	0	0	0	0	0	0	1
2112030	2	1969	7	2	4	2	3	1	3	1	1	6	6	6	6	4	1	1	1	2	1	1	1	0	0	0	0	0	0	0	0	0	0	0	2
89501641430690883	2	1958	1	2	4	1	3	2								3	-1	3	3	-1	1	4	-1	0	0	0	0	0	0	0	0	0	0	0	1
4442822	1	1972	3	2	4	1	1	2								3	3	3	3	2	2	2	2	0	0	0	0	0	0	0	0	1	0	0	1
4442681	2	1999	7	1	2	1	4	1	2	2	1	6	2	2	6	3	3	3	3	3	2	3	2	0	0	0	0	0	0	0	0	0	0	0	2
4413169	1	1983	5	1	4	2	1	1	2	2	1	3	5	5	6	3	2	2	3	2	2	3	2	1	1	0	0	0	0	0	0	0	0	0	1
89711641386497057	2	1986	3	2	4	1	3	1	1	3	1	1	1	2	6	3	3	4	3	1	3	3	4	0	0	0	0	0	0	0	1	0	0	0	3
4441112	2	1972	4	2	4	2	1	1	3	1	1	6	6	6	6	3	3	3	3	3	2	3	3	0	0	0	0	0	0	0	0	0	0	0	2
89571641385183399	2	1975	3	2	4	1	1	1	3	3	1	1	6	5	6	3	3	3	3	2	2	2	2	0	0	0	0	0	0	0	0	0	0	0	1
4441194	1	1984	3	2	4	2	1	1	1	1	1	1	1	2	6	4	1	4	1	1	1	1	1	0	0	0	0	0	0	0	0	0	0	0	2
89451641367809584	2	1970	3	2	4	3	1	1	1	1	1	1	6	2	6	4	3	3	3	3	3	3	3	0	0	0	0	0	0	0	0	0	0	0	2
4413179	2	1954	3	2	4	2	3	1	3	1	1	6	6	6	6	2	2	3	3	2	2	2	2	0	0	0	0	0	0	0	0	0	0	0	3
89461641380754313	1	1982	8	2	1	2	1	1	1	1	1	1	1	3	6	3	3	3	3	3	3	3	3	0	0	0	0	0	0	0	1	1	0	0	1
4413184	1	1986	3	2	4	1	1	1	3	1	1	3	6	4	1	3	3	3	3	3	2	3	2	0	0	0	0	0	0	0	0	0	0	0	2
89451641367491507	2	1992	4	2	3	3	1	1	3	1	2	1	6	2	6	4	3	3	3	3	3	3	3	0	0	0	0	0	0	0	0	0	0	0	2
4437182	1	1981	3	2	4	1	1	1	1	1	1	1	1	1	6	4	4	2	2	3	3	3	1	1	1	0	0	0	0	0	0	0	0	0	2
89381641376591212	2	1954	2	5	4	1	3	1	1	1	1	1	2	3	5	3	4	3	3	3	3	3	3	1	0	0	0	0	0	0	1	1	0	0	1
4441127	2	1975	3	2	4	2	1	1	1	1	1	1	6	4	6	3	3	3	3	3	3	3	3	0	0	0	0	0	0	0	0	0	0	0	2
89751641375322444	2	1960	2	2	4	1	1	2								3	3	3	4	3	3	3	3	0	0	0	0	0	0	0	0	0	0	0	2
4413178	2	1984	3	2	4	1	2	1	1	1	1	3	3	4	6	3	3	3	3	3	3	3	3	0	0	0	0	0	0	0	0	0	0	0	2
4442129	1	1955	4	2	4	3	3	2								4	3	-1	3	2	-1	4	1	0	0	0	0	0	0	0	0	0	0	0	2
4433169	1	1967	7	2	1	1	3	2								4	4	4	3	3	2	-1	2	0	0	0	0	0	0	0	0	0	0	0	1
89671641371987488	1	2003	8	1	2	1	4	1	5	1	1	6	3	2	5	4	4	4	4	3	3	4	4	1	1	0	0	0	0	0	0	0	0	0	3
89681641371528592	2	1977	2	2	4	1	3	1	5	1	1	6	6	5	6	3	2	-1	3	3	2	3	2	0	0	0	0	0	0	0	0	0	0	0	1
4441116	2	1966	4	2	4	3	3	2								3	3	3	3	3	-1	3	3	0	0	0	0	0	0	0	0	0	0	0	3
4433241	1	1956	2	2	4	1	3	2								4	3	-1	3	3	-1	3	-1	0	0	0	0	0	0	0	0	0	0	0	1
89601641370880384	2	1979	3	2	4	3	1	1	4	1	2	6	6	4	6	3	3	3	3	3	3	3	3	0	0	0	0	0	0	0	1	1	0	0	1
4407569	1	1960	4	2	4	1	1	2								3	3	3	3	3	3	3	3	0	0	0	0	0	0	0	0	0	0	0	1
89491641370709405	2	1983	6	2	4	2	3	1	2	1	2	6	6	2	6	4	4	4	3	2	2	3	2	0	0	0	0	0	0	0	0	0	0	0	2
89751641369863060	1	1980	3	2	4	1	1	1	1	2	1	6	6	3	6	3	2	2	3	2	1	2	2	0	0	1	0	0	0	0	0	0	0	0	1
4413194	2	1964	3	2	4	1	1	2								4	4	2	2	2	4	4	4	0	0	0	0	0	0	0	0	0	0	1	3
4413142	1	1997	7	1	4	3	1	1	2	1	1	2	5	2	5	4	4	4	4	4	4	4	4	0	0	0	0	0	0	0	0	0	0	0	1
89581641369007600	1	1997	8	1	2	1	1	1	1	1	1	2	2	4	1	3	3	3	3	2	2	2	1	0	0	0	0	0	0	0	0	1	0	0	1
4410159	2	1952	3	2	4	1	1	2								3	3	3	3	3	3	3	2	0	0	0	0	0	0	0	0	0	0	0	1
89721641369131946	1	1952	2	2	4	2	3	2								-1	2	3	2	3	3	2	2	0	0	0	0	0	0	0	0	0	0	0	1
4442353	2	1970	2	2	4	2	3	2								3	3	3	3	3	3	2	3	0	0	0	0	0	0	0	0	0	0	0	3
4410177	1	1990	5	2	4	1	1	1	4	1	1	2	5	2	4	3	3	3	3	3	3	3	3	0	0	0	0	0	0	0	0	0	0	0	1
89591641367558619	2	1987	3	2	4	1	1	1	1	1	1	6	4	4	6	3	3	3	3	3	3	3	3	0	0	0	0	0	0	0	0	0	0	0	3
89731641366223397	2	1985	8	2	4	1	1	1	1	6	1	1	1	1	6	3	3	3	4	3	3	3	3	0	0	0	0	0	0	0	0	1	0	0	2
4413174	2	1991	3	2	4	1	3	1	4	1	1	2	2	2	5	3	3	3	3	3	3	3	3	0	0	0	0	0	0	0	0	0	0	0	1
89471641367004885	1	1955	2	2	4	3	3	2								3	3	3	3	2	2	3	3	0	0	0	0	0	0	0	0	0	0	0	1
4407522	1	1989	4	2	4	1	3	1	3	3	1	6	5	3	6	4	4	3	3	3	3	3	2	0	0	0	0	0	0	0	0	0	0	0
4413150	1	1955	4	2	4	1	3	1	2	2	3	6	6	6	2	3	3	3	3	3	3	3	3	0	0	0	0	0	0	0	0	0	0	0
4441153	2	1975	3	2	4	3	3	1	2	6	2	6	2	4	5	3	3	3	3	2	2	2	3	1	0	0	0	0	0	0	0	0	0	0	2
89671641363930051	1	1968	4	2	4	1	3	1	3	1	1	6	6	6	6	-1	-1	-1	-1	-1	-1	-1	-1	0	0	0	0	0	0	0	0	0	0	0	2
4433214	2	1957	1	5	4	1	3	2								-1	-1	-1	3	3	-1	3	-1	0	0	0	0	0	0	0	0	0	0	0
89741641355314221	1	1959	2	2	1	1	1	2								3	3	3	2	-1	-1	2	3	0	0	0	0	0	0	0	0	0	0	0	1
89551641355172802	1	2003	7	1	2	1	4	1	2	1	1	6	1	2	6	4	4	3	3	3	2	3	2	1	0	0	0	0	0	0	0	1	0	0	1
89531641354917170	1	1970	3	2	4	1	1	1	3	1	1	6	6	4	6	3	3	3	2	3	3	2	2	0	0	0	0	0	0	0	0	0	0	0	2
4407697	1	1994	3	2	4	1	1	1	1	1	1	6	6	2	6	3	3	3	3	3	3	3	2	0	0	0	0	0	0	0	0	0	0	0	3
4407328	1	1995	7	1	4	1	1	1	1	1	1	6	5	4	6	4	3	4	3	3	3	3	3	1	0	0	0	0	0	0	0	0	0	0	2
4413145	2	1956	2	2	4	1	3	1	1	4	1	6	6	6	6	3	3	3	2	3	3	3	2	0	0	0	0	0	0	0	0	0	0	0	2
4433008	2	1997	5	2	4	1	3	1	4	1	1	6	6	3	6	3	3	3	3	2	2	3	2	0	0	0	0	0	0	0	0	0	0	0	3
4441135	2	1956	3	2	4	2	3	2								4	4	3	3	3	4	4	4	0	0	0	0	0	0	0	0	0	0	0	2
4442605	1	1962	3	2	4	1	1	2								4	3	1	2	4	4	4	4	0	0	0	0	0	0	0	1	0	0	0	2
4413177	2	1953	2	2	4	2	3	2								4	2	3	3	2	1	2	2	0	0	0	0	0	0	0	0	0	0	0	2
4404112	1	1964	3	2	4	3	3	1	1	1	6	6	1	4	6	4	4	3	3	3	3	3	3	0	0	0	0	0	0	0	0	0	0	0	2
89601641350628106	1	1957	2	2	4	1	3	2								3	3	3	2	3	1	3	2	0	0	0	0	0	0	0	0	0	0	0	1
89731641347126263	2	1961	4	2	4	3	3	1	5	1	1	6	6	6	6	4	4	3	4	3	3	3	3	0	0	0	0	0	0	0	0	0	0	0	2
4441115	1	1954	4	3	4	3	3	1	1	1	5	6	6	6	6	3	3	3	2	3	1	1	3	0	0	0	0	0	0	0	0	0	0	0	3
89741641349811629	2	1993	2	2	4	1	3	1	2	2	1	6	6	6	6	3	3	3	3	3	3	3	3	0	0	0	0	0	0	0	0	0	0	0
4413164	2	1955	5	3	1	1	3	1	1	2	1	6	3	6	6	4	4	3	3	3	2	3	3	1	0	0	0	0	0	1	0	1	0	0	2
89721641349376545	1	1971	4	3	4	4	2	1	6	2	1	6	6	5	6	3	4	3	3	-1	3	3	3	0	0	0	0	0	0	0	0	0	0	0
89381641349381869	2	1952	2	2	4	1	3	2								3	3	3	3	3	3	3	3	0	0	0	0	0	0	0	0	0	0	0	2
4407249	2	1956	2	2	4	1	3	2								-1	3	-1	-1	-1	-1	-1	-1	0	0	0	0	0	0	0	0	0	0	0	1
4433063	2	1954	1	5	4	1	3	2								4	4	-1	2	3	3	3	3	0	0	0	0	0	0	0	0	0	0	0	1
89201641347437947	1	1983	3	3	4	1	1	1	1	1	1	1	5	3	6	3	2	3	3	2	1	3	3	0	0	0	0	1	0	0	1	0	0	0	1
4410164	2	1952	1	2	4	1	1	2								4	4	4	3	3	3	3	3	0	0	0	0	0	0	0	0	0	0	0	1
89201641346609503	1	1979	3	2	4	1	3	1	1	2	1	6	5	5	6	3	1	2	3	2	3	2	2	0	0	1	0	0	0	0	0	0	0	0	1
4433021	1	1993	3	1	4	1	2	2								2	3	4	3	3	3	3	2	0	0	0	0	0	0	0	0	0	0	0
89201641345418546	2	1991	3	2	4	1	3	1	1	1	1	6	6	2	6	4	2	3	3	3	1	3	3	0	0	0	0	0	0	0	0	0	0	0	2
4442297	2	1958	2	2	4	1	1	2								3	3	3	3	3	3	3	3	0	0	0	0	0	0	0	0	0	0	0	2
4437160	1	1955	4	2	1	1	3	2								-1	3	3	3	-1	3	3	2	0	0	0	0	0	0	0	0	0	0	0	2
4441199	2	1981	3	2	4	1	3	1	4	1	1	5	2	2	6	3	3	3	3	3	3	3	3	0	0	0	0	0	0	0	0	0	0	0	2
4410112	2	1991	8	2	1	2	1	1	1	1	1	1	1	1	6	3	3	3	3	3	3	3	3	0	0	0	0	0	0	0	0	0	0	0	1
4441148	2	1966	2	2	4	1	1	2								3	3	3	3	3	3	3	3	0	0	0	0	0	0	0	0	0	0	0	2
89741641292577007	2	1958	2	5	4	1	1	2								3	-1	3	2	2	1	3	1	0	0	0	0	0	0	1	0	0	0	0	2
4407907	1	1991	5	2	4	1	1	1	2	1	1	1	2	4	6	3	3	3	3	2	2	2	2	0	0	0	0	0	0	0	0	0	0	0	3
4442208	2	1989	3	2	4	3	3	1	3	1	1	6	6	5	6	3	2	3	3	3	2	3	2	0	0	0	0	0	0	0	0	0	0	0	2
4437138	2	1966	2	2	4	3	3	1	6	4	1	6	6	5	6	-1	-1	-1	-1	-1	2	1	2	0	0	0	0	0	0	0	0	0	0	0	2
4441178	2	1963	3	2	4	3	3	1	2	1	1	6	6	5	6	3	3	4	3	3	3	2	2	0	0	0	0	0	0	0	0	0	0	0	2
4404116	1	1992	8	1	4	3	1	1	1	1	1	1	1	1	5	4	4	3	3	3	2	3	3	1	0	0	1	1	1	0	1	1	0	0	2
4410162	2	1966	2	5	4	1	3	2								3	-1	-1	-1	-1	2	1	-1	0	0	0	0	0	0	0	0	0	0	0	1
4407533	1	1971	1	2	4	2	1	2								-1	3	4	4	4	3	4	3	0	0	0	0	0	0	0	0	0	0	0	3
4410190	2	1964	3	2	4	2	1	1	6	6	2	6	6	6	6	4	3	4	4	-1	1	1	1	0	0	0	0	0	0	0	0	0	0	0	1
4433323	1	1993	4	2	4	1	2	1	2	4	2	6	1	4	6	3	3	-1	-1	2	2	2	1	0	0	0	0	0	0	0	0	0	0	0
4413153	1	1974	3	4	4	2	2	1	1	1	1	6	6	4	6	3	2	2	3	2	3	2	2	0	0	0	0	0	0	0	0	0	0	0	2
4407480	1	1952	2	2	4	1	3	2								3	3	3	3	3	3	3	3	0	0	0	0	0	0	0	0	0	0	0	1
4433301	2	1971	2	2	4	1	1	2								4	4	4	3	3	3	3	1	0	0	0	0	0	0	0	0	0	0	0	1
4410130	1	1994	5	2	4	2	2	1	2	1	1	2	6	3	6	4	3	4	3	3	3	3	3	0	0	0	0	0	0	0	0	0	0	0	1
4433196	2	1959	4	2	4	1	1	1	6	1	2	6	6	6	6	4	2	3	3	2	3	3	2	0	0	0	0	0	0	0	0	0	0	0	1
4413119	1	1958	7	2	1	2	3	1	1	6	1	6	1	4	6	3	4	3	3	3	3	3	3	0	0	0	0	0	0	0	0	0	0	0	1
4433001	1	1964	3	2	4	1	3	1	1	1	1	6	6	6	6	4	2	2	-1	3	3	2	2	1	0	0	0	0	0	0	0	0	0	0	1
4441156	2	1969	3	2	4	3	3	1	1	2	1	6	6	3	6	4	4	4	4	4	4	4	4	0	0	0	0	0	0	0	0	0	0	0	2
4441132	1	1979	7	2	4	2	1	1	1	1	1	6	5	3	6	2	4	4	3	2	2	4	2	0	0	0	0	0	0	0	0	0	0	0	3
2106079	1	1986	3	2	4	1	3	1	1	4	1	6	5	5	6	2	2	2	2	1	1	2	2	0	0	0	0	0	0	0	0	0	0	0	2
2106039	1	1957	3	2	1	1	3	2								2	2	3	3	2	2	2	2	0	0	0	0	0	0	0	0	0	0	0	1
2112028	2	1956	4	2	4	2	3	2								3	4	3	3	2	2	2	3	0	0	0	0	0	0	0	0	0	0	0	2
2305014	2	1959	3	2	4	2	3	1	1	1	2	6	6	6	6	3	3	2	2	2	2	3	3	0	0	0	0	0	0	0	0	0	0	0	2
2305013	2	1986	7	2	4	1	1	1	1	1	1	1	4	4	6	3	3	3	3	3	3	3	3	0	0	0	0	0	0	0	0	1	0	0
2305023	2	1979	7	2	4	2	1	1	2	1	1	1	1	3	6	3	3	3	3	3	3	3	3	0	0	0	0	0	0	0	0	1	0	0	1
2305019	2	1971	8	5	1	2	1	1	1	1	1	1	1	5	6	3	3	3	3	3	2	3	3	0	0	1	0	0	1	0	0	1	0	0	1
2305021	2	1969	8	2	1	2	3	1	2	3	1	1	3	4	6	3	4	3	3	3	3	3	3	0	0	0	0	0	0	0	1	1	0	0	1
2305006	1	1983	4	2	1	2	3	1	1	1	1	1	1	3	6	4	4	4	4	4	4	4	4	0	0	0	0	0	0	0	0	0	0	0	1
2305005	2	1964	3	2	4	2	3	1	1	1	1	6	6	6	6	4	4	4	4	3	3	2	3	0	0	0	0	0	0	0	0	1	0	0	1
2106037	2	1956	2	5	4	1	3	2								-1	-1	-1	1	-1	1	1	1	0	0	0	0	0	0	0	0	0	0	0	2
2305007	2	1954	3	2	4	3	1	1	1	1	1	6	5	3	6	3	4	3	3	-1	2	4	4	0	0	0	0	0	0	0	0	1	0	0	1
2112025	2	1975	7	2	4	2	1	1	1	2	1	6	6	3	6	4	4	3	3	3	3	3	3	0	0	0	0	0	0	0	0	0	0	0	2
2305010	1	2000	6	1	4	2	1	1	1	2	3	1	3	5	6	4	4	3	4	4	3	3	3	0	0	0	0	0	0	0	0	1	0	0	2
2112006	2	1993	4	2	4	2	3	1	1	1	1	6	1	1	6	4	4	4	4	4	4	4	4	0	0	0	0	0	0	0	0	0	0	0	2
2306010	1	1985	7	2	4	2	1	1	1	1	2	1	1	3	6	3	2	2	2	2	2	2	2	1	0	0	0	0	0	0	0	0	0	0	3
2306006	2	1996	7	1	2	3	2	1	3	1	1	1	3	1	5	4	4	4	4	3	3	3	3	0	0	0	0	0	0	0	0	0	0	0
2306024	2	1967	5	2	4	2	1	1	1	1	1	6	3	1	4	3	3	3	3	3	3	3	-1	0	0	0	0	0	0	0	0	1	0	0	1
2306002	1	1960	4	2	4	2	1	1	1	1	2	6	6	5	6	3	3	-1	-1	-1	-1	3	-1	0	0	0	0	0	0	0	0	0	0	0	2
2306019	1	1961	4	2	4	2	1	1	2	6	2	6	6	6	6	4	3	3	2	3	3	3	2	0	0	0	0	0	0	0	0	0	0	0	2
2112005	2	1965	3	2	4	2	3	2								4	4	2	4	1	1	1	1	0	0	0	0	0	0	0	0	0	0	0	2
2112004	2	1971	5	2	4	2	1	2								1	2	2	2	1	1	2	2	0	0	0	0	0	0	0	0	0	0	0	2
2306012	2	1969	7	2	4	2	3	1	4	2	6	6	6	5	6	3	3	-1	3	3	-1	3	2	0	0	0	0	0	0	0	0	1	0	0	1
2306022	2	1971	7	2	1	2	1	1	2	2	2	1	1	5	5	3	3	3	3	3	3	3	3	0	0	0	0	0	0	0	0	0	0	0	1
2306025	2	1968	7	2	1	2	1	1	1	1	2	1	5	4	6	3	4	4	3	3	3	3	3	0	0	0	0	0	0	0	0	0	0	0	1
2306020	2	1984	6	2	2	2	2	1	3	3	1	6	3	2	6	2	-1	-1	2	2	2	2	-1	0	0	0	0	0	0	0	0	1	0	0	1
2307009	2	1979	4	2	4	2	1	1	1	1	1	6	1	3	6	3	4	4	2	2	2	2	2	1	0	0	0	1	0	0	1	1	0	0
2306017	2	1976	3	2	4	2	3	1	3	5	6	2	2	1	6	4	4	4	4	4	4	4	3	0	0	0	0	0	0	0	0	0	0	0	1
2306016	2	1996	7	1	2	2	1	1	1	1	1	1	2	2	3	4	3	3	3	3	3	3	3	1	0	0	0	0	0	0	0	0	0	0	1
2307012	2	1988	8	1	1	2	1	1	1	2	1	6	1	2	6	4	3	3	4	1	1	3	3	0	0	1	0	0	0	0	1	1	0	0	2
2306003	2	1982	7	2	1	2	1	1	1	2	2	1	1	2	6	3	3	3	3	3	3	3	3	0	0	0	0	0	0	0	0	1	0	0	1
2306007	2	1967	7	4	1	2	1	1	2	3	3	1	2	4	5	3	3	3	3	2	1	2	-1	0	0	0	0	0	0	0	0	1	0	0	1
2307002	2	1990	7	2	4	2	1	1	3	1	1	6	1	1	6	3	-1	-1	2	3	2	3	-1	0	0	0	0	0	0	0	0	1	0	0	1
2307010	1	1956	4	5	4	2	3	1	1	1	5	6	6	4	6	3	3	2	2	-1	-1	-1	2	0	0	0	0	0	0	0	0	0	0	0	2
2112003	2	1967	5	5	4	2	3	2								3	3	3	3	3	3	3	3	0	0	0	0	0	0	0	0	0	0	0	2
2112001	1	1982	5	2	4	2	1	1	3	1	6	2	2	2	6	4	4	4	4	4	4	4	4	0	0	0	0	0	0	0	0	0	0	0	2
2112024	1	1962	7	2	4	2	1	2								3	3	3	3	3	3	3	3	0	0	0	0	0	0	0	0	0	0	0	2
2112021	1	1988	8	1	4	2	1	1	1	2	1	2	2	2	3	4	4	4	4	4	4	4	4	0	0	0	0	0	0	0	0	0	0	0	2
2112019	2	1964	8	2	4	2	3	1	1	3	2	6	6	4	6	3	3	3	3	3	3	3	2	0	0	0	0	0	0	0	0	0	0	0	2
2111009	2	1980	7	1	4	2	1	1	1	1	3	3	6	3	6	3	3	2	3	2	2	2	3	0	0	0	0	0	0	0	0	0	0	0	2
2108013	1	1986	8	1	4	1	1	2								3	2	2	3	2	3	2	3	0	0	0	0	0	0	0	0	0	0	0	2
2108060	1	1977	4	2	4	1	3	1	4	2	1	6	4	6	6	3	3	3	3	2	2	2	2	0	0	0	0	0	0	0	0	0	0	0	1
2112016	2	1985	4	2	4	2	1	2								3	2	2	2	2	2	2	2	0	0	0	0	0	0	0	0	0	0	0	2
2108010	1	1978	3	2	4	1	3	1	1	3	2	6	6	4	6	4	3	3	2	3	3	2	3	1	0	0	0	0	0	0	1	0	0	0	1
2111010	1	1984	8	2	4	2	1	1	1	1	1	1	1	1	6	3	3	3	3	3	3	3	3	0	0	0	0	0	0	0	0	0	0	0	2
2111011	2	1987	7	2	4	2	1	1	1	1	1	1	1	1	6	4	4	4	4	4	2	4	2	0	0	0	0	0	0	0	0	0	0	0	2
2108005	1	1981	4	2	4	2	1	1	4	2	1	2	4	5	6	2	3	3	3	3	2	3	2	0	0	0	0	0	0	0	0	0	0	0	1
2111025	2	1973	7	2	4	2	1	1	1	1	1	4	6	2	6	3	3	2	3	2	2	2	2	0	0	0	0	0	0	0	0	1	0	0	2
2108012	2	1964	3	5	4	2	3	1	4	4	2	6	6	6	6	2	3	3	3	2	2	2	2	0	0	0	0	0	0	0	0	0	0	0	2
2108007	1	1973	3	1	4	1	3	1	4	2	1	6	6	6	6	4	3	3	3	2	2	3	3	0	0	0	0	0	0	0	0	0	0	0	2
2111024	1	1995	8	2	4	2	1	1	2	2	2	6	5	4	6	2	3	4	1	1	1	2	2	0	0	0	0	0	0	0	0	0	0	0	2
2108009	1	1977	3	2	4	1	1	1	1	3	1	6	6	6	6	3	3	2	2	2	1	3	2	1	0	0	0	0	0	0	0	1	0	0	1
2111023	2	1968	5	2	4	2	3	2								2	2	2	3	2	2	3	3	0	0	0	0	0	0	0	0	0	0	0	2
2111006	2	1971	4	4	4	2	3	1	5	3	3	1	6	3	6	3	3	2	3	3	2	3	3	0	0	0	0	0	0	0	0	0	0	0	2
2106029	2	1978	3	4	4	1	3	1	6	2	2	6	6	3	6	2	2	3	3	3	2	3	3	0	0	0	0	0	0	0	0	0	0	0	1
2111021	2	1989	8	1	4	2	1	1	1	1	1	2	1	2	6	4	3	3	3	3	3	3	3	0	0	0	0	0	0	0	0	0	0	0	2
2106011	1	1993	3	2	2	1	3	1	1	2	1	6	6	2	6	4	3	4	4	3	3	3	3	0	0	0	0	0	0	0	1	0	0	0	1
2106009	2	1989	3	2	4	1	3	1	3	2	1	6	6	6	6	3	2	2	3	3	2	2	2	0	0	0	0	0	0	0	0	0	0	0	2
2111020	2	1958	3	2	4	2	3	2								3	2	-1	1	1	1	3	2	0	0	0	0	0	0	0	0	0	0	0	2
2111008	2	1966	5	5	4	2	3	2								1	-1	1	2	1	1	2	-1	0	0	0	0	0	0	1	0	0	0	0	2
2111018	2	1957	5	4	4	2	3	2								-1	1	1	1	1	1	1	1	0	0	0	0	0	0	0	0	0	0	0	2
2111004	2	1962	8	4	4	2	3	1	2	4	6	6	6	2	6	3	3	3	2	3	3	2	3	0	0	0	0	0	0	0	0	0	0	0	2
2111017	1	1956	4	2	4	2	3	2								2	2	3	3	2	1	3	2	0	0	0	0	0	0	0	0	0	0	0	2
2111003	2	1973	2	2	4	2	1	2								3	3	3	3	3	2	2	2	0	0	0	0	0	0	0	0	0	0	0	2
2111016	2	1965	4	2	4	2	1	1	1	1	1	6	6	3	6	3	2	2	3	2	2	2	2	0	0	0	0	0	0	0	0	0	0	0	2
2111001	2	1988	8	1	2	2	1	1	3	1	2	1	1	4	6	4	4	2	4	3	2	3	3	0	0	0	0	0	0	0	0	0	0	0	2
2111015	2	1969	3	2	4	2	3	2								3	3	3	3	3	2	3	2	0	0	0	0	0	0	0	0	0	0	0	2
2110025	2	1974	4	5	4	2	1	1	4	1	1	1	6	2	6	-1	-1	-1	-1	3	-1	-1	-1	0	0	0	0	0	0	0	0	0	0	0	2
2108003	2	1956	2	2	4	1	3	2								3	3	3	3	3	3	3	2	0	0	0	0	0	0	0	0	0	0	0	1
2108008	2	1981	3	2	4	1	3	1	3	2	1	6	6	2	6	4	4	4	4	3	3	3	3	0	0	0	0	0	0	0	0	0	0	0	1
2108006	1	1971	2	1	4	1	3	1	6	6	1	6	6	3	6	3	4	4	4	3	2	3	3	0	0	0	0	0	0	0	0	0	0	0	1
2110010	2	1965	7	2	4	2	1	1	2	1	1	6	6	2	6	3	3	2	3	2	3	3	3	0	0	0	0	0	0	0	0	0	0	0	2
2108034	2	1977	3	4	4	1	3	1	6	4	1	6	6	2	6	3	3	3	3	3	3	3	3	0	0	0	0	0	0	0	0	0	0	0	1
2108001	1	1978	4	4	4	1	3	1	1	3	1	6	6	6	6	3	3	4	3	3	3	3	3	0	0	0	0	0	0	0	0	0	0	0	1
2110024	2	1961	8	5	4	2	3	1	1	1	3	6	6	6	6	4	3	-1	2	3	-1	2	3	0	0	0	0	0	0	0	0	0	0	0	2
2110008	2	1960	3	4	4	1	3	2								3	3	2	2	1	2	2	2	0	0	0	0	0	0	0	0	0	0	0	2
2110020	1	1987	8	1	4	2	1	1	4	4	3	2	3	3	6	2	2	2	1	2	1	2	2	0	0	0	0	0	0	0	0	0	0	0	2
2110007	1	1983	6	1	4	2	1	1	1	1	1	6	6	1	6	3	3	3	3	3	3	3	3	0	0	1	0	0	0	0	0	0	0	0	2
2106020	2	1979	3	2	4	1	3	1	2	6	1	6	6	5	6	4	4	4	3	3	3	3	3	0	0	0	0	0	0	0	0	0	0	0	1
2106016	2	1957	2	2	4	1	3	2								-1	-1	-1	-1	-1	-1	-1	-1	0	0	0	0	0	0	0	0	0	0	0	1
2110006	2	1967	4	3	4	2	3	2								2	2	4	4	4	4	4	4	0	0	0	0	0	0	0	0	0	0	0	2
2110018	2	1968	3	2	4	2	3	2								4	3	3	3	3	3	3	3	0	0	0	0	0	0	0	0	0	0	0	2
2106013	2	1957	2	5	4	1	3	2								-1	3	2	2	3	3	3	3	0	0	0	0	0	0	0	0	0	1	0	2
2110017	2	1987	3	1	4	2	1	1	2	1	1	6	6	6	6	3	4	3	3	3	3	3	3	0	0	0	0	0	0	0	0	0	0	0	2
2106008	2	1966	4	2	4	1	3	2								2	3	2	2	-1	3	-1	-1	0	0	0	0	0	0	0	0	0	0	0	2
2110005	2	1989	8	2	4	2	1	1	1	1	1	1	1	2	6	4	4	4	4	4	4	4	4	0	0	0	0	0	0	0	0	0	0	0	2
2110004	2	1963	7	2	4	2	3	1	5	4	2	6	5	3	6	3	2	2	1	2	2	1	1	0	0	0	0	0	0	0	0	0	0	0	2
2110015	2	1975	8	2	4	2	1	1	2	4	6	6	3	1	6	3	3	2	3	2	2	3	3	0	0	0	0	0	0	0	0	0	0	0	2
2110014	2	1969	4	2	4	2	3	1	1	1	3	6	6	6	6	4	3	3	3	3	2	3	3	0	0	0	0	0	0	0	0	0	0	0	2
2110003	1	1967	7	6	4	3	1	1	1	1	6	1	6	6	1	3	4	4	3	3	3	3	3	0	0	0	0	0	0	0	0	0	0	0	2
2110002	2	1989	8	2	2	2	1	1	1	1	1	1	3	2	6	4	4	4	4	4	3	4	4	1	0	0	0	0	0	0	0	0	0	0	2
2106014	2	1973	2	2	4	1	1	1	6	6	2	6	6	6	6	4	-1	-1	-1	3	3	3	3	0	0	0	0	0	0	0	1	0	0	0	1
2110001	1	1967	7	1	4	2	1	1	1	1	6	6	6	6	6	3	4	4	3	3	3	3	3	0	0	0	0	0	0	0	0	0	0	0	2
2106010	2	2002	8	1	4	1	4	1	2	1	1	4	1	3	5	3	3	3	3	3	3	3	3	1	0	0	0	0	0	0	0	0	0	0	1
2110013	2	1977	7	2	4	2	1	1	3	2	1	5	4	1	6	3	2	2	1	2	2	3	3	0	0	0	0	0	0	0	0	0	0	0	2
2106006	1	1986	6	2	4	1	3	1	3	1	2	6	6	6	6	3	2	-1	-1	-1	-1	-1	-1	0	0	0	0	0	0	0	0	0	0	0	2
2106002	1	1990	3	2	4	1	3	1	1	4	2	6	6	6	6	4	3	3	3	3	3	3	3	0	0	0	0	0	0	0	0	0	0	0	2
2105025	1	1970	4	4	4	1	3	1	1	1	1	1	1	6	6	3	3	3	2	2	1	1	3	0	0	0	0	0	0	0	0	1	0	0
2105023	2	1952	5	2	4	3	3	1	1	1	1	6	6	4	6	3	4	3	4	3	3	3	3	0	0	0	0	0	0	0	0	0	0	0	2
2117010	2	1969	4	2	4	2	3	1	6	1	1	6	6	6	6	3	-1	3	3	3	-1	-1	-1	0	0	0	0	0	0	0	0	0	0	0	2
2105008	2	1955	3	2	4	2	3	1	6	3	1	6	6	4	6	4	3	2	2	2	1	3	3	0	0	0	0	0	0	0	0	0	0	0	2
2117017	1	1960	2	2	4	1	3	2								4	4	2	2	3	3	2	2	0	0	0	0	0	0	0	0	0	0	0	2
2117015	2	1969	4	2	4	2	1	1	6	1	1	6	2	2	6	4	4	4	4	4	4	4	4	0	0	0	0	0	0	0	0	0	0	0	2
2117008	1	1995	7	1	4	2	1	1	4	3	2	2	6	4	6	2	2	2	3	3	2	2	2	0	0	0	0	0	0	0	0	0	0	0	2
2105006	2	1968	4	4	4	3	3	1	3	2	1	4	4	2	6	3	2	3	3	2	2	3	2	0	0	0	0	0	0	0	0	1	0	0	2
2117025	2	1958	7	3	4	2	1	1	1	1	1	6	6	3	6	4	2	1	2	1	1	1	1	0	0	0	0	0	0	0	0	0	0	0	2
2117007	1	1980	3	2	4	1	1	1	1	1	1	2	3	2	6	3	3	3	3	3	3	3	3	0	0	0	0	0	0	0	0	0	0	0	2
2117023	1	1968	8	4	1	2	1	1	1	2	2	2	3	2	6	3	2	2	2	3	2	3	2	0	0	0	0	0	0	0	0	0	0	0	2
2105012	2	1963	4	5	4	3	3	1	3	1	1	6	6	3	6	3	3	3	3	-1	2	2	3	0	0	0	0	0	0	0	0	0	0	0	2
2117005	2	1967	3	2	4	2	3	1	2	2	1	6	6	6	6	4	2	1	3	3	2	3	2	0	0	0	0	0	0	0	0	0	0	0	2
2117021	2	1962	3	4	4	2	3	1	1	2	4	6	4	2	6	4	4	4	3	3	2	3	4	0	0	0	0	0	0	0	0	0	0	0	2
2117003	2	1969	5	2	4	2	3	2								2	1	2	2	2	1	1	1	0	0	0	0	0	0	0	0	0	0	0	2
2117020	2	1973	7	2	2	2	1	2								2	2	1	2	1	1	1	1	0	0	0	0	0	0	0	0	0	0	0	3
2117002	2	1967	3	2	4	2	3	2								3	4	3	3	2	2	3	3	0	0	0	0	0	0	0	0	1	0	0	2
2102009	2	1963	4	2	4	2	3	1	1	1	6	6	6	6	6	4	2	2	3	3	3	3	1	0	0	0	0	0	0	0	0	0	0	0	2
2102013	1	1965	4	2	4	2	1	1	1	1	2	6	6	3	6	3	2	2	2	2	2	2	3	1	0	0	0	0	0	0	0	0	0	0	2
2102014	2	1974	7	2	4	2	1	1	3	3	1	2	2	3	6	3	3	3	3	2	2	4	3	0	0	0	1	0	0	0	1	1	0	0	3
2102008	2	1966	4	4	4	2	1	2								3	1	1	1	1	1	1	1	0	0	0	0	0	0	0	0	0	0	0	2
2102010	2	1986	7	1	2	2	1	1	1	1	1	1	1	2	6	4	4	4	4	4	4	4	4	0	0	0	0	0	0	0	0	0	0	0	3
2102001	1	1968	4	2	4	2	1	1	6	3	2	6	6	4	6	3	3	2	2	1	1	2	2	0	0	0	0	0	0	0	0	0	0	0	2
80331637642782938	1	1993	3	1	4	1	3	2								1	1	3	3	1	1	1	1	0	0	0	0	0	0	0	0	0	0	0	2
80331637642689144	2	1993	7	1	4	2	1	1	1	1	1	2	6	4	6	3	3	3	3	3	3	3	3	0	0	0	0	0	0	0	0	0	0	0	2
80321637643424186	1	1999	5	1	4	2	3	2								1	-1	3	4	1	1	1	1	0	0	0	0	0	0	0	0	0	1	0	2
83501637472775526	2	1987	9	2	1	2	1	1	1	4	1	1	1	1	4	3	3	3	3	3	1	3	3	0	0	0	0	0	0	0	0	0	0	0	3
83571637472573461	2	1952	5	2	4	3	3	1	1	3	2	6	3	3	5	2	3	3	2	2	3	3	3	0	0	0	0	0	0	0	0	1	0	0	1
83621637467084581	2	1964	7	3	4	3	3	1	1	1	3	6	6	1	4	4	3	3	3	2	2	2	2	0	0	0	0	0	0	0	0	0	1	0	1
83581637467464805	2	1972	9	2	4	3	1	1	2	2	2	6	3	3	6	3	2	3	2	2	2	1	1	0	0	0	0	0	0	0	0	0	0	0	1
83481637469703203	2	1970	3	2	4	2	3	1	3	1	1	6	6	3	6	3	3	3	2	2	2	2	3	0	0	0	0	0	0	0	0	0	0	0	1
83461637467048069	2	1961	7	2	4	3	3	2								3	3	3	3	3	3	3	3	0	0	0	0	0	0	0	0	0	0	0	2
83641637467072184	1	1992	8	1	4	3	1	1	2	2	1	2	4	1	4	3	3	3	3	3	3	3	3	1	1	0	0	0	0	0	0	0	0	0	2
83641637467019498	2	1981	8	2	4	2	1	1	1	1	1	1	1	1	1	3	3	3	3	2	2	2	3	0	0	0	0	0	0	0	0	0	0	0	3
3105025	2	1974	8	2	1	2	1	1	1	1	1	6	1	1	3	4	4	4	4	4	2	4	4	0	0	0	0	0	0	0	0	0	0	0	1
83571637462118140	1	1960	4	2	4	2	3	1	3	6	3	6	6	3	6	2	2	3	3	3	2	2	2	0	0	0	0	0	1	0	0	1	0	0	1
83541637460499214	2	1967	7	2	4	3	1	1	2	6	3	1	2	2	2	4	3	3	3	3	3	3	3	0	0	0	0	0	0	0	0	0	1	0	1
83591637460706366	2	1963	7	2	4	2	3	1	2	2	6	6	2	2	6	3	3	3	3	3	3	3	3	0	0	0	0	0	0	0	0	0	0	0	1
83621637459421635	1	1970	7	2	1	1	1	1	1	1	1	1	3	1	1	3	3	3	3	3	3	3	3	0	0	0	0	0	0	0	0	0	0	0	1
83481637459798402	2	1976	7	2	4	2	3	1	1	2	1	6	6	2	6	3	2	3	3	1	2	3	3	0	0	1	0	0	0	0	0	0	0	0	2
3105009	2	1977	7	2	4	3	1	1	2	2	2	2	6	4	6	3	3	3	3	3	3	3	3	0	0	0	0	0	0	0	0	0	0	0	1
3105008	1	1982	9	2	4	3	1	1	2	2	1	6	4	4	6	3	3	3	3	3	2	3	2	1	0	0	0	0	0	0	0	1	0	0	2
3105002	2	1953	3	2	4	3	3	1	4	1	1	6	6	2	6	3	3	3	3	2	2	2	2	0	0	0	0	0	0	0	0	0	0	0	1
83471637401785037	2	1963	2	2	4	2	3	2								3	3	3	3	3	3	3	3	0	0	0	0	0	0	0	0	0	0	0	1
3106025	1	1990	7	2	4	2	1	1	3	1	1	6	4	5	6	4	3	4	4	3	3	3	3	0	0	0	0	0	0	0	0	0	0	0	1
3106017	1	1969	2	2	4	1	1	2								1	1	1	1	1	1	1	1	0	0	0	0	0	0	0	0	0	0	0	3
3106019	2	1962	3	2	1	2	3	2								-1	-1	-1	-1	-1	-1	-1	-1	0	0	0	0	0	0	0	0	0	0	0	1
3105001	2	1968	8	2	4	3	3	1	1	1	2	6	3	6	6	3	3	3	3	3	3	3	3	0	0	0	0	0	0	0	0	0	0	0	1
3106018	2	1964	3	2	4	1	3	2								2	2	2	2	2	2	2	2	1	0	0	0	0	0	0	0	0	0	0	1
83461637394432984	2	1951	3	2	4	3	3	2								3	3	2	3	2	2	2	2	0	0	0	0	0	0	0	0	0	0	0	1
3105014	2	1953	2	2	4	1	3	2								3	3	3	3	3	2	2	3	0	0	0	0	0	0	0	0	0	0	0	1
3105017	1	1953	7	2	1	3	3	1	1	2	1	6	6	4	6	3	3	3	2	3	2	3	3	1	0	1	0	0	1	0	0	1	0	0	1
83441637392587128	2	1953	2	5	4	2	3	2								-1	3	3	3	2	3	3	3	0	0	0	0	0	0	0	0	0	0	0	1
83411637391880824	2	1959	3	2	4	1	3	2								-1	3	3	3	-1	-1	2	-1	0	0	0	0	0	0	0	0	0	0	0	1
83471637390065793	2	1965	3	2	4	1	3	2								3	2	2	2	2	3	1	2	0	0	0	0	0	0	0	0	0	0	0	2
83441637388521690	2	1967	3	2	4	1	3	1	3	1	1	6	6	1	6	3	2	1	2	2	2	2	2	0	0	0	0	0	0	0	0	0	0	0	3
83401637386845046	1	1959	2	2	4	1	3	2								4	4	4	4	4	4	4	4	0	0	0	0	0	0	0	0	0	0	0	1
83471637385658945	1	1975	3	2	4	1	1	1	1	3	1	1	1	1	1	4	2	2	2	3	3	2	1	0	0	0	0	0	0	0	0	0	0	0	2
3106005	2	1966	3	2	4	1	3	2								3	3	3	3	3	3	3	3	0	0	0	0	0	0	0	0	0	0	0	1
83411637375629015	1	1957	2	2	4	1	3	2								4	4	4	4	4	4	4	4	0	0	0	0	0	0	0	0	0	0	0	1
83441637375004962	2	1963	3	5	4	1	3	2								3	3	3	3	3	3	3	3	0	0	0	0	0	0	0	0	0	0	0	1
83441637373502734	1	1992	3	2	4	1	1	1	1	1	1	1	1	1	6	1	4	4	3	2	3	2	2	0	0	0	0	0	0	0	0	0	0	0	3
83401637373006713	1	1975	4	2	4	3	1	1	1	1	1	1	1	1	1	3	3	3	3	3	3	3	3	0	0	0	0	0	0	0	0	0	0	0	1
3106012	2	1962	3	2	4	2	3	1	1	1	2	6	6	6	6	4	4	4	2	2	3	2	2	0	0	0	0	0	0	1	0	0	0	0	1
3106024	2	1962	2	4	4	1	1	2								4	4	4	4	4	4	4	4	0	0	0	0	0	0	0	0	0	0	0	3
80331637064357064	1	1989	4	2	4	2	1	1	3	1	1	6	6	4	6	4	3	4	3	3	3	3	3	0	0	0	0	0	0	0	0	0	0	0	2
80321636985804866	1	2000	8	1	2	3	4	1	1	1	1	1	1	1	1	3	3	3	3	3	3	3	3	0	0	0	0	0	0	0	0	0	0	0	2
80331637052154734	1	1995	4	1	4	3	1	1	3	3	3	6	3	3	6	3	2	2	2	2	2	2	2	0	0	0	0	0	0	0	0	0	0	0	2
80321636983125447	1	1993	3	1	4	1	1	2								4	3	4	4	4	4	4	4	0	0	0	0	0	0	0	0	0	0	0	2
80331636980079999	1	1998	8	1	4	3	4	1	2	2	2	6	2	2	6	3	3	3	3	3	3	3	3	0	0	0	0	0	0	0	0	0	0	0	2
80331636977106803	1	1990	10	1	4	3	1	1	1	1	1	1	1	1	6	3	3	3	3	3	3	3	3	0	0	0	0	0	0	0	0	0	0	0	2
4202022	2	1995	7	2	4	2	3	1	5	1	1	6	6	2	6	3	3	3	3	3	3	3	3	0	0	0	0	0	0	0	0	0	0	0	2
83471636875633139	2	1987	8	1	4	2	1	1	1	1	1	1	2	3	4	3	3	3	3	2	1	3	3	0	0	0	0	0	0	0	0	1	0	0	2
83491636875640039	1	1979	8	2	1	2	1	1	1	2	1	6	6	5	6	4	4	4	4	4	4	4	4	0	0	0	0	0	0	0	0	0	0	0	1
3108013	1	1989	8	2	1	2	1	1	2	2	2	1	5	5	6	3	3	3	3	3	3	3	3	0	0	0	0	0	0	0	0	0	0	0
83501636871377282	1	1993	8	1	4	1	1	1	1	1	1	6	1	4	2	2	2	2	2	2	2	2	2	1	1	0	0	0	0	0	0	0	0	0	3
83441636870198579	2	1981	5	2	4	2	1	1	1	1	1	1	6	1	6	3	3	3	3	3	3	3	3	0	1	0	0	0	0	0	0	0	0	0	2
83541636862545923	1	1969	7	3	4	3	1	1	6	2	2	2	2	2	2	3	3	3	3	3	3	3	3	0	0	0	0	0	0	0	0	0	0	0
83631636862034103	1	1989	7	2	4	1	1	1	1	1	1	6	6	2	6	3	3	2	3	3	3	2	2	0	0	0	0	0	0	0	0	0	0	0	3
83641636858736980	1	1984	2	6	4	2	1	1	1	2	2	2	3	3	6	1	3	3	3	3	3	3	1	0	0	0	0	0	0	0	0	0	0	0
83611636856148679	2	1987	3	2	4	1	1	1	2	2	3	6	2	4	6	1	2	2	3	3	2	2	2	0	0	1	0	0	0	0	0	0	0	0	2
83641636855831396	2	1996	5	2	4	2	1	1	2	2	2	2	3	2	2	3	3	3	3	3	3	3	3	0	0	0	0	0	0	0	0	0	0	0	2
83411636854386045	2	1989	7	2	1	1	1	1	1	1	1	1	2	4	1	3	3	3	3	3	3	3	3	0	0	0	0	0	0	0	0	0	0	0	3
3108010	1	1988	9	2	4	1	1	1	1	1	1	6	1	1	6	3	3	3	3	3	3	3	3	0	0	0	0	0	0	0	0	0	0	0	2
3107021	1	1984	3	2	4	3	1	1	1	2	1	2	2	2	6	2	2	3	3	3	3	3	2	0	0	0	0	0	0	0	1	0	0	0	3
3107019	1	1986	3	2	4	1	1	1	3	1	1	1	3	2	6	3	3	3	3	3	3	3	3	1	0	0	0	0	0	0	0	0	0	0	2
83461636785386207	1	1962	7	1	4	3	1	1	1	6	1	6	6	6	1	4	3	3	3	3	3	3	3	0	0	0	0	0	0	0	0	0	0	0
83481636787596136	1	1952	3	2	4	2	3	1	1	1	5	6	6	6	6	3	3	3	2	3	2	2	3	1	0	0	0	0	0	0	0	0	0	0	1
83411636783800908	2	1965	4	2	4	3	3	1	6	1	6	6	6	6	6	3	-1	-1	3	-1	2	3	3	0	0	0	0	0	0	0	0	0	0	0	2
83601636782095734	2	1993	4	2	4	1	2	1	3	2	1	6	1	1	6	1	2	3	4	3	3	3	3	0	0	0	0	0	0	0	0	0	0	0
3107015	1	1990	4	2	4	2	1	1	1	2	1	1	2	2	5	2	2	2	3	3	3	2	3	0	1	0	0	0	1	0	0	0	0	0	2
3107013	2	1961	3	2	4	1	3	2								-1	3	-1	2	-1	2	2	1	0	0	0	0	0	0	0	0	0	0	0	1
83501636779861477	2	1993	8	2	2	1	3	1	1	1	3	3	3	1	3	3	3	3	3	3	3	3	3	1	0	0	0	1	0	0	0	0	0	1	2
3107002	1	1973	2	2	4	1	1	1	1	1	1	6	6	2	6	2	2	3	2	3	3	2	2	0	0	0	0	0	0	0	0	0	0	0
83401636783791345	2	1997	8	1	2	2	1	1	2	1	1	1	3	4	4	3	2	3	3	2	2	2	2	1	0	0	0	1	0	0	0	1	0	0	2
83611636783875008	2	1972	3	2	4	1	1	1	2	1	1	6	6	3	6	4	3	2	2	3	2	1	2	0	0	0	0	0	0	0	0	0	0	0	2
3108016	2	1972	3	2	4	2	3	1	6	1	1	6	6	3	6	4	2	2	2	2	2	3	3	0	0	0	0	0	0	0	0	0	0	0	2
83631636776407325	1	1987	4	2	4	1	1	1	1	1	1	6	6	3	6	3	3	3	2	2	3	-1	3	0	0	0	0	0	0	0	0	0	0	0	2
3107007	1	1995	7	2	2	1	1	1	3	3	1	1	4	3	6	4	4	4	4	3	3	4	4	0	0	0	0	0	0	0	0	0	0	0	2
3108004	2	1965	2	2	4	1	3	2								2	2	2	2	2	2	2	2	0	0	0	0	0	0	0	0	0	0	0	2
3108011	1	1952	3	2	1	2	3	1	1	1	1	6	6	2	6	3	3	3	3	3	3	3	3	0	0	0	0	0	0	0	0	0	0	0	3
3107008	2	1969	1	2	4	1	3	2								3	3	3	3	3	1	3	1	0	0	0	0	0	0	0	0	0	0	0	2
3107001	2	1982	3	2	4	1	1	1	1	3	1	6	6	4	6	3	3	3	3	3	3	3	3	0	0	0	0	0	0	0	0	0	0	0	3
3107024	2	1966	3	2	4	1	1	1	1	1	6	6	6	1	6	3	3	3	3	3	1	1	1	0	0	0	0	0	0	0	0	0	0	0
3107010	2	1968	1	2	4	1	3	2								3	3	3	3	3	2	2	2	0	0	0	0	0	0	0	0	0	0	0	3
3107005	2	1971	1	2	4	1	1	1	1	1	1	6	6	6	6	2	3	3	3	3	2	3	2	0	0	0	0	0	0	0	0	0	0	0	3
3108015	1	1961	4	3	4	2	3	1	1	2	1	6	6	3	5	4	3	3	3	3	1	1	2	0	0	0	0	0	0	0	1	0	0	0	2
3108003	2	1961	2	3	4	1	1	1	1	1	1	6	6	6	6	3	3	3	3	3	3	3	3	0	0	0	0	0	0	0	0	0	0	0	3
4202018	2	1991	3	2	4	2	3	1	6	6	1	6	6	3	6	3	3	3	3	3	3	3	3	0	0	0	0	0	0	0	0	0	0	0	2
4204025	1	1991	9	2	4	1	1	1	2	1	1	1	1	1	1	3	3	3	3	3	3	3	3	0	0	0	0	0	0	0	0	0	0	0	2
4204024	1	2001	8	1	4	1	4	1	1	1	1	1	1	1	6	3	3	3	3	3	3	3	3	0	0	0	0	0	0	0	0	0	0	0	2
4204005	2	1994	7	1	4	2	1	1	6	1	5	5	5	5	5	3	3	3	3	3	3	3	3	0	0	0	0	0	0	0	0	0	0	0	2
4202017	1	2000	8	1	2	1	3	1	2	1	1	6	1	4	6	2	2	3	3	2	2	2	2	0	0	0	0	0	0	0	0	0	0	0	2
4204010	2	2002	8	1	2	2	4	1	1	1	1	5	1	2	6	3	3	3	3	3	3	3	3	1	0	0	0	0	0	0	0	0	0	0	2
4202022Rp8032	2	1985	8	4	4	2	3	1	3	2	1	6	4	4	2	4	2	4	3	2	2	3	3	0	0	0	0	0	0	0	0	0	0	0	2
4202015	2	1996	3	1	4	2	1	1	6	1	1	6	6	2	6	3	3	3	3	3	3	3	3	0	0	0	0	0	0	0	0	0	0	0
4204008	2	2002	8	1	2	3	4	1	5	1	1	6	2	6	6	3	3	3	3	3	3	3	3	0	0	0	0	0	0	0	0	0	0	0	3
4204015	2	2000	4	1	4	2	1	1	2	2	2	2	2	2	2	3	3	3	3	3	3	3	3	0	0	0	0	0	0	0	0	0	0	0	2
4204001	2	2003	8	1	2	2	4	1	1	1	1	6	1	1	6	3	3	3	3	3	2	3	3	1	0	0	0	0	0	0	0	0	0	0
4202020	2	1972	4	2	4	2	3	2								3	3	3	3	3	3	3	3	0	0	0	0	0	0	0	0	0	0	0	2
4204019	1	1987	7	2	4	1	3	1	1	1	1	1	6	4	6	2	2	2	2	2	2	2	2	0	0	0	0	0	0	0	0	0	0	0	2
2301003	1	1987	8	1	4	2	1	1	1	1	1	6	6	3	6	4	-1	1	3	2	1	1	1	1	0	0	0	0	0	0	0	0	0	0
2301005	2	1998	8	1	2	2	4	1	2	1	1	6	1	2	6	3	4	3	3	3	3	3	2	1	0	0	0	0	0	0	1	1	0	0	2
2301015	1	1961	6	2	1	2	3	2								4	-1	-1	-1	-1	-1	3	-1	0	0	0	0	0	0	0	0	0	0	0	2
2301016	2	1973	7	2	4	3	3	1	1	1	1	6	6	5	6	4	3	3	2	2	3	1	4	0	0	0	0	0	0	0	0	0	0	0	2
73591635651316536	2	1974	7	2	1	1	1	1	1	3	1	6	3	6	6	4	4	3	3	3	3	3	3	0	0	1	0	0	0	0	1	1	0	0	1
2304004	2	1973	2	2	4	3	2	1	1	1	1	6	6	1	6	2	3	3	4	1	3	4	4	0	0	0	0	0	0	0	0	0	0	0	2
2302011	2	1975	3	2	4	1	3	2								4	3	3	3	3	3	3	3	0	0	0	0	0	0	0	1	0	0	0	1
2302022	2	1956	2	2	4	1	3	2								4	3	4	4	3	3	3	3	0	0	0	0	0	0	0	1	0	0	0	1
2302008	2	1967	3	4	4	1	3	1	1	1	1	6	6	4	6	3	3	3	3	-1	-1	-1	-1	0	0	0	0	0	0	0	0	0	0	0	1
5403046	2	1994	3	2	4	1	1	1	6	6	1	6	6	6	6	4	4	4	4	4	4	4	4	0	0	0	0	0	0	0	0	0	0	0	1
5403033	1	1962	2	2	4	1	3	1	4	6	1	6	5	6	6	4	4	4	4	4	4	4	4	0	0	0	0	0	0	0	0	0	0	0	1
5403017	1	1983	2	1	4	1	1	2								4	4	4	4	4	4	4	4	0	0	0	0	0	0	0	0	0	0	0	1
5403024	1	1958	1	2	1	1	3	2								4	4	4	4	4	4	4	4	0	0	0	0	0	0	0	0	0	0	0	2
5403018	2	1967	1	5	4	1	1	2								4	3	4	4	4	4	4	3	0	0	0	0	0	0	0	0	0	0	0	1
5403035	2	1987	2	2	4	1	1	1	6	6	1	6	6	6	6	4	4	4	4	4	4	4	4	0	0	0	0	0	0	0	0	0	0	0	1
5403022	2	1989	1	2	4	1	1	1	1	3	1	6	6	6	6	4	4	4	4	3	3	3	4	0	0	0	0	0	0	0	0	0	0	0	1
5403020	2	1980	1	2	4	1	1	1	6	6	5	6	5	6	6	4	4	4	4	4	4	4	4	0	0	0	0	0	0	0	0	0	0	0	2
5403032Rp8888	2	1985	2	2	4	1	1	1	6	1	1	6	6	6	6	3	3	3	3	4	4	4	3	0	0	0	0	0	0	0	0	0	0	0	1
5403032	1	1997	3	2	4	1	1	1	1	1	1	6	1	1	6	4	4	4	4	4	4	4	4	0	0	0	0	0	0	0	0	0	0	0	1
5403031	2	1957	1	2	4	1	1	2								4	4	3	4	4	3	3	4	0	0	1	0	0	0	0	1	0	0	0	1
5403037	2	1958	1	5	1	1	3	2								4	4	4	4	-1	-1	4	4	0	0	0	0	0	0	0	0	0	0	0	1
5403040	1	1979	2	2	4	1	1	1	6	6	1	6	6	6	6	4	4	4	4	4	4	4	4	0	0	0	0	0	0	0	0	0	0	0	1
5403032Rp8890	2	1977	1	2	4	1	1	1	6	2	1	6	6	6	6	4	3	3	3	3	4	4	4	0	0	1	0	0	0	0	1	0	0	0	1
5403036	1	1985	2	2	4	1	2	1	5	4	1	6	6	6	6	4	4	4	4	4	4	4	4	0	0	0	0	0	0	0	0	0	0	0	2
5403028	1	1969	2	2	4	1	1	2								3	3	2	3	3	3	3	3	0	0	0	0	0	0	0	0	0	0	0	1
5403066	1	1977	1	2	4	1	1	1	6	6	1	6	6	6	6	4	3	4	4	4	3	4	4	0	0	0	0	0	0	0	0	0	0	0	1
4204004	2	1989	3	4	4	1	1	2								3	-1	-1	-1	-1	-1	-1	-1	0	0	0	0	0	0	0	0	0	0	0	2
4204003	2	2001	3	1	2	2	1	1	6	1	1	6	6	2	6	3	3	3	3	3	3	3	3	0	0	0	0	0	0	0	0	0	0	0	2
5404021	1	1959	2	2	4	1	3	2								3	3	3	-1	3	3	3	3	0	0	0	0	0	0	0	0	0	0	0	1
5404024	2	1975	1	2	4	1	1	1	4	2	2	6	6	6	6	4	4	4	4	4	3	3	4	0	1	0	0	1	0	0	0	0	0	0	1
5404041	1	1989	2	2	4	1	1	1	6	6	1	6	6	6	6	3	3	3	3	3	3	3	3	0	0	0	0	0	0	0	0	0	0	0	1
5404003	2	1982	1	2	4	1	1	2								4	3	4	4	4	4	4	4	0	0	1	0	0	0	0	0	1	0	0	1
5404005	1	1973	1	2	1	1	1	1	3	1	1	6	6	6	6	4	4	4	4	-1	4	4	4	0	0	0	0	0	0	0	0	0	0	0	1
5404032	2	1976	1	2	4	1	1	1	1	1	6	6	6	6	6	-1	4	4	4	4	4	4	4	0	0	0	0	0	0	0	0	0	0	0	1
5404042	1	1963	2	2	1	1	3	2								4	4	4	4	4	4	4	4	0	0	0	0	1	1	0	1	0	0	0	1
5404006	2	1990	2	2	1	1	1	1	5	4	1	6	6	6	6	4	4	4	4	4	4	4	4	0	0	0	0	0	0	0	1	0	0	0	1
5404047	2	1959	1	2	4	1	1	2								4	4	4	4	4	4	4	4	0	0	1	1	0	0	0	0	0	0	0	1
5404002	1	1981	3	2	4	1	3	1	6	6	1	6	6	6	6	3	3	3	3	3	3	3	3	0	0	0	0	0	0	0	0	0	0	0	1
5404012	1	1990	3	2	4	1	1	2								4	4	4	4	4	4	4	4	0	0	0	0	0	0	0	0	0	0	0	1
5404025	2	1985	1	2	4	1	1	1	6	6	1	6	6	6	6	4	4	4	4	3	3	4	4	0	0	0	0	0	0	0	0	0	0	0	1
5404020	1	1969	2	2	4	1	1	1	3	4	1	6	6	6	6	4	3	4	4	4	3	4	3	0	0	0	0	0	0	0	0	0	0	0	1
5404052	2	1984	1	2	4	1	3	1	6	6	3	6	6	6	6	3	3	4	4	3	4	4	4	0	0	0	0	0	0	0	0	0	0	0	2
5404069	2	1978	1	2	1	1	1	1	3	2	1	6	5	6	6	4	4	4	4	4	4	4	4	0	0	0	0	0	0	0	1	1	0	0	1
5404004	1	1985	2	2	4	1	1	1	2	1	1	6	6	6	6	1	4	4	4	3	4	4	4	0	0	0	0	0	0	0	0	0	0	0	1
5404059	1	1960	2	5	4	1	3	2								1	3	3	3	3	3	3	3	0	0	0	0	0	0	0	0	0	0	0	1
4204022	1	1975	7	2	4	2	1	1	1	1	2	2	6	3	6	4	3	4	4	2	2	4	2	0	0	0	0	0	0	0	0	0	0	0	2
1101010	2	1977	7	2	4	2	3	1	1	1	2	6	6	2	6	2	3	3	3	2	3	3	2	0	0	0	0	0	0	0	1	0	0	0	1
1104026	2	1955	5	2	4	2	1	2								2	2	2	2	2	2	2	2	0	0	0	0	0	0	0	0	0	0	0	2
1104002	1	1988	7	1	4	3	1	1	1	1	1	1	1	1	1	3	3	3	3	3	3	3	3	0	0	0	0	0	0	0	0	0	0	0	2
5401062	2	1970	1	2	4	1	1	2								4	4	4	4	4	4	4	4	0	0	0	0	0	0	0	0	0	0	0	1
5401017	2	1965	1	2	4	1	3	1	5	4	1	6	5	6	6	4	3	4	4	3	4	4	3	0	0	0	0	0	0	0	0	0	0	0	1
5401052Rp8886	2	1966	2	2	4	1	1	2								3	3	4	4	3	3	4	3	0	0	0	0	0	0	0	0	0	0	0	1
5401086	2	1973	1	2	4	1	1	1	2	1	1	6	6	6	6	4	3	3	3	3	4	3	4	0	0	0	0	0	0	0	0	0	0	0	1
5402041	1	1963	2	2	1	1	1	2								2	3	3	3	3	3	3	3	0	0	0	0	0	0	0	0	0	0	0	1
5401084	1	1964	1	2	4	1	3	2								4	4	3	4	4	3	4	4	0	0	0	0	0	0	0	0	0	0	0	1
1104055	2	1956	8	2	1	3	1	1	2	2	1	1	1	3	5	3	-1	-1	3	2	2	3	2	0	0	0	1	0	0	0	0	0	0	0	2
1101006	2	1977	7	2	4	2	3	1	1	1	2	6	6	2	6	2	3	3	3	2	3	3	2	0	0	0	0	0	0	0	1	0	0	0	1
1104085	1	1963	7	2	1	3	1	1	1	6	6	6	6	6	6	3	3	3	3	-1	-1	3	-1	0	0	0	0	0	0	0	0	0	0	0	1
5402110	2	1968	2	5	4	1	1	2								3	3	3	4	3	3	4	4	0	0	0	0	0	0	0	0	0	0	0	1
1104084	2	1990	8	2	1	3	1	1	5	4	1	1	4	2	5	3	3	3	3	3	3	3	3	0	0	0	0	0	0	0	0	0	0	0	1
1101020	2	1953	3	2	4	2	3	1	1	6	1	6	1	6	6	4	3	3	3	-1	3	3	3	0	0	0	0	0	0	0	0	0	0	0	1
1101011	2	1956	4	2	4	3	3	2								3	3	-1	3	3	2	1	2	0	0	0	0	0	0	0	0	0	0	0	1
4202004	1	1983	8	4	4	3	1	1	1	1	1	1	2	3	6	4	4	4	4	3	4	4	4	0	0	0	0	0	0	0	0	0	0	0	2
5402013	1	1973	1	1	4	1	1	1	6	6	3	6	6	6	6	3	3	3	3	3	3	3	3	0	0	0	0	0	0	0	0	0	0	0	1
5402074	1	1972	1	2	4	1	1	1	6	2	1	6	6	6	6	4	4	4	3	3	4	3	3	0	0	1	1	0	0	1	1	1	0	0	2
5402008	2	1961	1	1	4	1	1	2								4	4	4	4	3	4	3	4	0	0	0	0	0	0	0	0	0	0	0	1
5402078	1	1962	1	2	4	1	1	2								4	4	4	4	-1	-1	4	4	0	0	0	0	0	0	0	0	0	0	0	1
5402032	2	1962	1	2	4	1	3	2								-1	4	4	4	4	4	4	4	0	0	0	0	0	1	0	0	0	0	0	1
4204009	1	2002	8	1	2	1	4	1	1	1	1	1	1	1	5	3	3	3	3	3	3	3	3	0	0	0	0	0	0	0	0	0	0	0	3
1104067	2	1973	2	4	4	1	1	1	1	1	1	6	1	4	6	3	3	3	2	3	3	2	3	0	0	0	0	0	0	0	0	0	0	0
4204006	2	2002	8	1	2	2	4	1	3	1	1	6	1	1	6	3	3	3	3	2	2	-1	3	0	0	0	0	0	0	0	0	1	0	0	3
5402019	2	1976	1	2	4	1	1	2								3	3	4	4	3	3	3	3	0	0	0	0	0	0	0	0	0	0	0	2
5402086	2	1984	1	2	4	1	1	2								4	4	4	4	-1	-1	4	4	0	0	0	0	0	0	0	0	1	0	0	1
5402027	2	1956	1	5	4	1	3	1	5	6	1	6	5	6	6	4	3	3	4	4	3	4	3	0	0	0	0	0	0	0	0	0	0	0	2
5402001	2	1960	1	2	4	1	1	2								4	4	4	4	4	4	3	4	0	0	1	0	0	0	0	0	0	0	0	1
5402012	2	1965	1	1	4	1	1	2								1	3	3	3	3	3	4	4	0	0	0	0	0	0	0	0	0	0	0	1
1104045	2	1960	8	2	4	2	3	1	1	1	1	6	5	3	6	3	3	3	2	2	2	2	2	1	0	0	0	0	0	0	0	1	0	0	3
4202019	2	1976	4	2	4	2	1	1	2	2	2	2	2	1	5	3	3	3	3	3	3	3	3	0	0	0	0	0	0	0	0	0	0	0	2
83571635043749006	2	1966	3	2	4	3	3	1	1	2	1	6	2	4	6	2	2	3	3	2	3	4	2	0	0	0	0	0	0	0	0	0	0	0	1
83541635043625755	2	1963	3	3	4	3	3	1	3	6	6	6	6	6	6	3	3	3	3	3	3	3	3	0	0	0	0	0	0	0	0	0	0	0	1
1104027	2	1965	7	2	1	3	3	1	2	2	1	5	4	4	5	3	3	3	3	3	3	3	3	0	0	0	0	0	0	0	0	1	0	0	2
5402073	2	1982	1	2	4	1	1	2								4	4	4	3	3	3	4	4	0	0	0	0	0	0	0	0	0	0	0	1
5402109	1	1971	3	2	4	1	1	1	2	1	1	2	3	6	6	2	2	2	3	2	4	2	2	0	0	1	0	0	0	0	0	0	0	0	1
5402088	1	1953	2	5	4	1	3	2								-1	3	4	4	4	4	4	4	0	0	0	0	0	0	0	0	0	0	0	1
5402024	2	1963	1	2	4	1	3	2								4	3	4	3	4	3	3	4	0	0	0	0	0	0	0	0	0	0	0	2
5402039	1	1982	1	2	4	1	1	1	4	6	2	6	6	6	6	4	4	4	3	3	3	3	3	0	0	0	0	0	0	0	0	0	0	0	1
4202016	1	1968	3	2	4	2	1	2								2	3	-1	3	2	2	2	-1	0	0	0	0	0	0	0	0	0	0	0	2
83631634987884313	1	1992	8	2	1	1	1	1	4	2	2	6	3	4	4	3	2	3	2	2	2	3	3	0	0	0	1	0	0	0	0	1	0	0	2
83611634987118546	1	1956	3	2	4	2	3	2								-1	-1	3	3	3	2	3	-1	0	0	0	0	0	0	0	0	1	0	0	1
5401044	1	1970	1	2	4	1	1	2								3	3	4	4	4	2	4	4	0	0	0	0	0	0	0	0	0	0	0	1
83641634986076912	1	1979	3	2	4	1	1	1	2	2	1	1	6	2	6	3	3	3	3	3	2	3	3	1	0	0	0	0	0	1	0	0	0	1	2
5401052	2	1963	1	1	4	1	3	2								4	4	4	3	4	3	4	4	0	0	0	0	0	0	0	0	1	0	0	1
5401057	2	1987	1	2	4	1	3	1	6	1	1	6	6	6	6	4	4	3	3	2	2	3	3	0	0	0	0	0	0	0	0	0	0	0	1
5401005	2	1980	2	2	4	1	1	1	2	4	3	6	6	4	6	3	3	3	3	3	3	3	3	0	0	0	0	0	0	0	0	0	0	0	1
4202010	1	1990	7	2	2	1	1	1	1	6	1	6	1	3	6	3	3	3	3	2	1	4	3	0	1	0	0	0	0	0	0	0	0	0
5401004	2	1989	1	2	4	1	1	1	6	6	1	6	6	6	6	2	3	3	2	2	3	2	3	0	0	1	1	0	0	1	0	0	0	0	1
5401021	2	1978	2	2	1	1	1	1	2	1	1	6	6	6	6	4	3	3	4	-1	4	4	4	0	0	0	0	0	0	0	0	0	0	0	1
83551634982163535	2	1957	1	5	4	3	3	2								3	3	3	2	2	2	3	3	0	0	0	0	0	0	0	0	0	0	0	1
83591634981848030	1	1974	3	2	4	2	1	1	2	1	1	2	3	3	6	1	2	3	1	2	1	1	2	0	0	0	0	0	0	0	0	0	0	0	2
1102026	2	1968	7	2	4	3	3	1	1	1	1	6	4	3	6	3	3	3	4	3	3	3	3	0	0	0	0	0	0	0	0	0	0	0	1
83631634980483202	1	1963	3	2	4	2	1	2								3	3	3	3	3	2	3	-1	0	0	0	0	0	0	0	0	0	0	0	1
1101079	2	1974	3	2	4	1	1	1	3	1	1	3	5	2	3	4	4	4	4	4	4	4	4	0	0	0	0	0	0	0	0	0	0	0	2
1102072	2	1959	4	2	1	3	3	1	1	6	6	1	1	5	6	-1	-1	3	3	3	3	3	3	0	0	0	0	0	0	0	0	0	0	0	1
5401046	2	1957	1	5	4	1	1	2								4	4	4	4	4	3	4	3	0	0	0	0	0	0	0	0	0	0	0	1
1102081	2	1976	7	2	4	2	1	1	1	1	1	1	3	1	5	3	3	3	3	2	2	3	3	0	0	1	0	0	0	0	0	1	0	0	1
5401035	1	1978	1	2	4	1	1	1	3	4	4	1	6	4	6	2	3	3	3	3	3	3	3	0	0	0	0	0	0	0	0	0	0	0	1
5401006	1	1978	1	2	4	1	1	1	6	3	1	6	6	6	6	4	4	4	3	4	4	3	4	0	0	0	0	0	0	0	1	0	0	0	1
5401010	1	1964	2	2	1	1	1	1	1	1	1	6	6	6	6	3	4	3	3	4	3	3	4	0	0	0	0	0	0	0	1	0	0	0	1
5401014	2	1991	3	2	4	1	3	1	4	1	1	6	6	6	6	4	4	4	4	4	4	4	4	0	0	0	0	0	1	0	0	1	0	0	1
5401003	1	1967	1	2	4	1	1	1	6	1	1	6	6	6	6	4	3	4	4	-1	3	4	4	0	0	0	0	0	0	0	0	0	0	0	1
83471634974456931	2	1966	4	4	4	3	1	1	2	1	1	1	6	4	6	4	3	2	1	1	1	1	1	0	0	0	0	0	0	0	0	0	0	0	2
1101058	2	1956	8	2	4	2	1	1	1	1	1	6	2	6	6	2	2	3	2	2	1	3	2	0	0	1	1	1	0	0	0	0	0	1	1
83581634973825647	2	1995	7	2	2	1	3	1	5	1	1	6	4	3	3	4	4	4	3	3	3	3	2	0	0	0	0	0	0	0	0	0	0	0
83441634957792933	2	1964	8	2	4	2	3	1	2	2	2	6	6	4	5	-1	-1	-1	-1	-1	-1	-1	-1	0	0	0	0	0	0	0	0	0	0	0	1
1101078	2	1957	4	4	4	2	3	1	1	1	1	6	6	3	6	3	3	-1	3	2	1	3	3	0	0	0	0	0	0	0	1	0	0	0	1
83491634972178932	2	1955	4	2	4	2	3	1	6	6	1	6	6	4	6	3	3	3	3	2	2	2	-1	0	0	0	0	0	0	0	0	0	0	0	1
83551634972007567	2	1958	3	2	4	3	3	2								-1	3	-1	2	-1	2	2	2	0	0	0	0	0	0	0	0	0	0	0	1
83401634440057615	2	1998	8	1	2	3	2	1	3	1	1	2	1	4	5	4	3	4	3	2	2	3	2	1	0	0	0	0	0	0	0	0	0	0	2
83471634956312492	1	1993	9	1	4	1	1	1	1	1	1	1	1	1	1	3	3	3	3	3	3	3	3	1	0	0	0	0	0	0	0	0	0	0	2
3104016	2	1986	8	2	1	3	1	1	2	1	1	1	3	2	6	3	3	3	3	3	3	3	3	1	0	0	0	0	0	0	0	0	0	0	3
83631634968313538	2	1978	7	2	4	2	3	1	1	1	1	6	1	1	3	2	3	3	2	2	2	3	3	1	1	0	0	0	0	0	0	0	0	0	2
83441634957699997	1	1982	7	2	4	2	1	1	1	1	1	2	3	2	5	3	2	3	2	3	3	3	3	1	1	1	0	0	0	0	1	1	0	0	1
1101045	2	1952	3	5	4	2	3	1	1	1	1	6	2	3	6	-1	3	-1	1	-1	1	1	-1	0	0	0	0	0	0	0	0	0	0	0	1
1102005	1	1973	7	2	1	2	1	1	1	1	1	1	3	3	4	3	3	3	3	2	2	3	3	0	0	0	0	0	0	0	0	0	0	0	2
83601634964621039	1	1998	8	1	2	3	1	1	2	2	1	1	2	2	5	3	3	4	4	3	3	4	3	1	0	0	0	0	0	0	0	0	0	0	2
3104021	2	1956	4	2	1	3	3	1	1	1	3	6	1	2	6	3	3	3	3	2	2	3	2	0	0	0	0	0	0	0	0	0	0	0	1
3101020	2	1988	7	2	4	2	1	1	1	1	1	6	2	1	6	1	2	2	4	2	1	3	2	0	1	1	0	0	0	0	0	0	0	1	1
3104008	2	1965	7	5	4	2	3	1	1	1	1	5	6	1	1	2	3	4	3	2	2	2	2	0	0	0	0	0	0	0	0	0	0	0	1
83401634958219032	1	1982	5	2	4	1	1	2								2	2	2	2	2	2	2	2	0	0	0	0	0	0	0	0	0	0	0	3
1102056	2	1959	7	2	4	2	3	1	1	1	6	6	3	2	6	3	3	3	3	3	2	2	2	0	0	1	0	0	0	0	0	0	0	0	1
3104019	1	1975	8	4	1	2	1	1	1	3	1	1	1	3	6	4	4	4	4	4	4	4	4	1	0	1	1	1	1	0	1	1	1	0	1
3104004	2	1969	3	2	4	1	1	1	1	1	1	6	6	3	6	3	2	3	3	3	4	4	3	0	0	0	0	0	0	0	0	0	0	0	2
1102022	1	1988	7	2	4	3	1	1	1	1	1	1	2	1	6	3	2	2	3	3	1	3	3	0	0	0	0	0	0	0	0	0	0	0	1
3104005	1	1987	8	1	4	3	1	1	5	1	5	1	5	1	6	3	2	3	3	2	2	3	3	0	0	0	0	0	0	0	0	0	0	0	2
83411634440146022	2	1981	9	2	1	2	1	1	1	1	1	1	1	1	4	3	3	3	3	3	2	3	3	1	0	0	1	0	0	0	0	1	0	0	3
3101017	1	1988	8	2	4	2	1	1	1	1	1	6	1	1	1	3	3	3	3	3	3	3	3	0	0	0	0	0	0	0	0	0	0	0	2
4202009	1	1997	9	1	1	1	4	1	4	1	1	1	1	3	6	3	3	3	3	3	3	3	3	0	0	0	0	0	0	0	0	0	0	0
4202007	2	2001	8	1	2	1	4	1	3	1	1	6	4	1	6	2	3	3	3	3	2	3	3	0	0	0	0	0	0	0	0	1	0	0	2
4202003	2	1990	9	1	4	2	1	1	5	1	1	1	4	3	5	3	2	2	2	2	1	-1	3	0	0	0	0	0	0	0	0	0	0	0	2
4202006	2	2002	8	1	2	1	4	1	1	1	1	1	1	1	1	4	4	4	4	4	4	4	4	0	0	0	0	0	0	0	0	0	0	0	2
1101055	1	1963	4	2	4	2	3	1	1	6	1	6	2	4	6	3	-1	3	3	2	-1	-1	3	0	0	1	0	0	0	0	0	0	0	0	1
4204018	1	2000	8	1	2	2	4	1	5	1	1	6	4	4	6	3	3	3	3	2	2	2	2	0	0	0	0	0	0	0	0	0	0	0	2
4204017	1	2000	8	1	2	2	4	1	1	1	1	2	1	3	3	4	3	3	3	2	2	2	2	0	0	0	0	0	0	0	0	0	0	0	2
4204021	1	1987	4	1	4	2	1	1	1	1	1	1	3	4	6	3	3	3	3	2	2	2	2	0	0	0	0	0	0	0	0	0	0	0	2
4202001	2	1999	8	1	2	1	2	1	1	1	1	1	2	2	3	3	3	3	3	3	3	4	2	0	0	0	0	0	0	0	0	0	0	0	2
1101070	1	1957	3	2	4	3	3	1	6	1	1	6	6	1	6	3	2	-1	3	1	1	3	1	0	1	1	0	0	0	1	0	0	0	0	1
1101080	1	1966	4	2	1	3	3	1	1	3	4	6	3	2	5	3	2	2	1	3	2	3	3	0	0	0	0	0	0	0	0	0	0	0	1
4204016	1	2002	8	1	2	2	4	1	1	1	1	1	1	1	6	4	3	3	3	3	2	2	2	1	0	0	0	0	0	0	0	1	0	0	2
3101002	1	1995	7	1	2	2	1	1	2	1	5	3	1	1	1	3	3	3	3	3	3	3	3	0	0	0	0	0	0	0	0	0	0	0	2
83621634457715169	1	1953	7	2	1	2	3	1	1	6	6	6	6	6	6	3	3	3	3	3	3	3	3	0	0	0	0	0	0	0	0	0	0	0
83511634445495776	1	1968	5	2	4	3	1	1	1	1	1	1	1	1	1	3	3	3	3	3	3	3	3	0	0	0	0	0	0	0	0	0	0	0	3
3101009	1	1954	8	2	1	3	3	1	4	6	6	6	6	4	6	3	3	3	3	3	2	2	3	0	0	0	0	0	0	0	0	0	0	0	2
1103079	2	1993	8	2	1	2	1	1	1	1	1	2	2	2	6	4	4	3	4	2	2	3	2	1	0	1	0	0	1	0	0	0	0	0	1
1103085	2	1979	8	2	1	2	1	1	2	1	3	1	1	2	6	4	4	4	3	3	3	3	4	1	0	1	1	0	0	0	1	1	0	0	1
1102055	2	1981	8	2	4	2	3	1	4	4	4	6	4	4	4	3	3	-1	3	2	2	2	2	0	0	0	0	0	0	0	0	0	0	0	2
1103080	2	1987	9	2	1	2	1	1	1	2	3	1	2	1	1	1	3	2	2	3	1	3	3	0	0	0	0	0	0	0	0	0	0	0	2
83491634440261058	2	1983	8	1	4	2	1	1	3	2	1	1	3	2	2	3	3	3	3	3	2	2	2	0	0	1	0	0	0	0	0	0	0	0	2
3103007	1	1997	8	1	2	3	1	1	1	1	1	6	1	2	2	3	3	3	3	3	2	3	2	0	0	0	0	0	0	0	0	1	0	0	2
1103004	1	1952	8	2	1	2	3	1	1	1	2	6	2	2	5	3	3	3	3	3	3	3	3	0	0	0	0	0	0	0	0	0	0	0	1
1103084	2	1959	7	2	4	3	3	1	1	2	1	6	6	5	5	2	2	3	2	2	1	3	3	0	0	0	0	0	0	0	0	0	0	0	1
83611634448782466	1	1996	7	6	1	1	1	1	1	3	1	1	2	5	1	4	3	4	1	3	3	3	3	0	0	0	0	0	0	0	0	0	0	0	2
1103029	2	1996	9	1	1	2	1	1	2	1	1	1	4	1	5	3	3	3	3	3	3	3	3	0	0	0	0	0	0	0	0	0	0	0
1103069	1	1959	4	2	1	3	3	1	1	1	1	6	1	4	6	4	3	3	3	3	3	3	3	0	0	0	0	0	0	0	0	0	0	0	1
83461634442338688	2	1953	3	2	4	2	3	2								-1	3	-1	3	-1	-1	3	3	0	0	0	0	0	0	0	0	0	0	0	1
83401634440291148	1	1985	7	2	4	2	1	1	1	1	1	1	3	1	5	2	2	3	3	3	3	4	3	1	0	0	0	0	0	0	0	0	0	0	2
1103050	2	1957	4	2	1	2	3	1	3	1	1	6	3	2	6	3	3	3	3	2	2	1	-1	0	0	1	0	0	0	0	0	0	0	0	1
1103038	1	1983	8	2	1	2	1	1	1	1	1	1	1	1	5	3	4	4	4	2	2	4	2	1	0	0	0	0	0	0	0	1	0	0	1
1103030	1	1957	3	2	4	2	3	2								3	3	3	1	2	2	1	2	0	0	0	0	0	0	0	0	0	0	0	2
1103024	1	1981	8	2	4	2	1	1	1	3	1	1	3	5	5	3	2	1	3	3	2	3	2	1	0	0	0	0	0	0	0	0	0	0	1
1103035	2	1959	5	2	1	2	3	1	1	1	1	6	6	1	5	3	3	-1	3	-1	2	2	-1	0	0	0	0	0	0	0	0	0	0	0	1
1103037	2	1979	8	4	4	2	1	1	2	1	1	1	5	1	5	3	3	3	3	3	3	3	3	0	0	0	0	0	0	0	0	0	0	0	1
83411634440028084	2	1959	4	3	1	2	3	1	1	6	1	6	1	1	6	3	3	2	2	2	1	2	2	0	0	0	0	0	0	0	0	0	0	0	2
83581634440318675	1	1956	4	5	4	2	3	1	3	1	1	6	6	6	6	-1	2	-1	4	-1	-1	2	-1	0	0	0	0	0	0	0	0	0	0	0	1
1103068	1	1984	9	6	4	2	1	1	1	1	1	1	1	1	6	3	3	3	3	3	3	3	3	1	0	0	0	0	0	0	0	0	0	0	1
83591634438160427	1	1994	7	2	4	3	1	1	4	2	1	1	4	3	4	4	2	2	3	1	1	3	3	0	0	0	0	0	0	0	0	0	0	0	2
1103052	2	1998	8	1	2	1	4	1	3	1	1	2	2	2	6	3	3	3	3	3	3	3	3	1	0	0	0	0	0	0	0	0	0	0	2
1103008	2	1956	3	4	4	2	3	1	6	1	1	6	6	1	6	3	2	2	2	2	2	2	1	0	0	1	0	0	0	0	0	0	0	0	1
3101023	1	1976	4	2	4	2	1	1	5	2	5	6	6	3	6	3	2	3	3	2	3	3	2	1	0	0	0	0	0	0	0	0	0	0	2
83581634439361765	1	1993	8	2	4	2	1	1	2	1	1	6	2	3	1	3	2	2	2	2	1	4	3	0	0	0	0	0	0	0	0	0	0	0	2
83641634439422146	2	1952	3	2	4	3	3	1	1	1	1	6	6	3	6	3	3	3	3	3	3	3	3	0	0	0	0	0	0	0	0	0	0	0	2
1102001Rp8863	2	1980	8	2	4	3	1	1	1	1	1	1	1	1	6	3	3	2	3	2	1	3	2	0	0	0	0	0	0	0	0	0	0	0	2
1102032	1	1953	3	4	4	2	3	1	1	1	6	6	6	6	1	1	2	3	3	2	1	3	1	0	0	0	0	0	0	0	0	0	0	0	1
83551634437555856	1	1999	7	1	2	1	1	1	1	1	1	1	3	5	6	3	3	4	3	2	2	3	3	0	0	0	0	0	0	0	0	0	0	0
3101025	2	1970	2	2	4	1	1	2								-1	1	-1	1	1	1	1	1	0	0	0	0	0	0	0	0	0	0	0	2
83601634437414369	1	1974	7	1	4	3	1	1	1	1	1	6	6	3	6	3	3	3	3	3	2	3	3	1	0	0	0	0	0	0	0	0	0	0	2
1103045	2	1965	7	2	1	2	3	1	1	1	1	6	1	1	6	3	4	3	4	3	3	3	3	0	0	1	0	0	0	0	1	1	0	0	1
83541634435638095	2	1986	9	2	1	2	1	1	1	1	1	1	1	1	6	3	4	4	3	3	2	3	3	1	0	0	0	0	0	0	0	1	0	0	2
1103070	2	1952	7	5	4	2	3	1	1	6	6	6	6	6	6	3	3	2	3	3	-1	3	3	0	0	0	0	0	0	0	0	0	0	0	1
1101022	2	1960	4	2	4	3	3	1	1	1	3	6	6	3	6	-1	3	-1	2	-1	-1	3	4	0	0	0	0	0	0	0	0	0	0	0	1
1101061	1	1977	3	2	4	1	1	1	1	1	1	1	6	1	6	4	3	3	4	3	1	1	1	1	0	0	0	0	0	0	0	0	0	0
1104032	2	1995	9	2	2	3	3	1	3	4	1	6	2	3	4	4	4	4	3	3	2	3	3	0	0	0	0	0	0	0	0	0	0	0	1
1102085	2	1958	4	4	4	2	3	1	6	6	6	6	6	2	6	-1	-1	1	2	2	2	2	2	0	0	1	0	0	0	0	0	0	0	0	1
1102054	2	1956	7	2	4	3	3	1	1	3	3	6	2	1	6	3	3	3	3	3	1	2	2	0	0	0	0	0	0	0	0	0	0	0	2
1101052	2	1980	8	1	4	2	1	1	1	1	1	1	1	1	1	3	3	3	3	3	3	3	3	1	0	0	0	0	0	0	0	0	0	0	1
83411634367551168	2	1983	7	2	4	2	1	1	1	1	1	1	1	1	1	3	2	2	3	3	3	2	2	0	0	0	0	0	0	0	0	0	0	0	1
1102063	2	1960	4	2	4	3	3	1	6	6	3	6	6	6	6	3	3	3	3	3	3	3	3	0	0	0	0	0	0	0	0	0	0	0	1
1102001	2	1957	4	2	4	2	3	1	1	1	1	1	6	2	5	3	3	3	3	3	3	3	3	0	0	1	0	0	0	1	1	1	0	1	1
83511634363382694	1	1991	9	1	4	3	1	1	1	1	1	1	1	1	1	4	3	2	2	2	1	3	2	0	0	0	0	0	0	0	0	0	0	0	1
3102014	1	1989	9	1	2	2	1	1	2	2	2	2	2	2	2	2	3	3	3	3	2	3	3	0	0	0	0	0	0	0	0	0	0	0	2
1101042	1	1993	7	1	2	3	1	1	1	1	1	1	3	3	6	3	3	3	3	3	3	3	3	0	0	0	0	0	0	0	0	0	0	0	2
83491634346996298	2	1987	7	1	4	1	1	1	1	1	1	1	6	1	6	4	4	4	3	3	3	3	3	0	0	0	0	0	0	0	0	0	0	0	2
83521633843860169	2	1978	8	1	4	2	1	1	1	1	1	1	5	1	1	3	2	2	3	3	2	3	2	0	0	1	0	0	0	0	0	0	0	0	2
1104077	1	1996	8	1	2	3	1	1	1	1	2	2	4	1	6	4	3	3	3	3	3	3	3	0	0	0	0	0	0	0	0	0	0	0	2
83501634347550445	1	1984	7	2	4	3	1	1	1	1	1	1	1	2	3	3	3	3	2	3	2	3	2	1	0	0	0	0	0	0	0	1	0	0	2
1102033	2	1980	9	4	1	2	1	1	1	1	2	1	1	2	1	4	3	2	3	2	2	3	3	0	0	0	0	0	0	0	0	1	0	0	3
1102067	1	1975	8	2	1	3	1	1	1	2	1	1	3	4	1	4	2	2	3	3	2	3	2	0	0	0	0	0	0	0	0	0	0	0	1
1101003	2	1973	8	2	4	3	3	1	1	1	6	6	4	1	1	3	3	3	3	2	2	3	2	0	0	0	0	0	0	0	0	1	0	0	2
83471634347200650	1	1981	8	2	4	2	1	1	1	1	1	1	1	2	3	4	4	4	3	3	3	3	3	0	0	0	0	0	0	0	0	0	0	0	2
1101065	2	1955	3	2	4	2	3	1	1	3	3	6	6	6	6	4	3	3	3	3	3	3	3	0	0	0	0	0	0	0	0	0	0	0	1
1104031	2	1963	4	1	4	3	1	1	6	1	6	6	6	2	5	3	3	3	3	3	3	3	3	0	0	0	0	0	0	0	0	0	0	0	1
1102015	1	1983	8	2	1	2	1	1	1	1	1	1	1	2	2	3	4	3	2	2	2	3	2	1	0	1	0	0	0	0	0	0	0	0	3
83511634308009987	2	1978	8	6	4	2	1	1	3	2	1	6	1	3	6	3	3	4	4	3	2	3	3	0	0	0	0	0	0	0	0	0	0	0	3
1101073	2	1954	5	2	1	3	3	1	1	6	2	6	2	6	6	3	3	4	2	3	3	2	3	0	0	0	0	0	0	0	0	0	0	0	1
1102061	2	1978	8	2	4	2	1	1	1	1	1	1	1	1	5	3	3	3	3	2	1	2	2	0	0	0	0	0	0	0	0	1	0	0	1
1104078	1	1972	7	2	4	2	1	1	1	2	1	1	6	1	2	3	3	3	3	3	3	3	3	0	0	0	0	0	0	0	0	0	0	0	1
1104037	1	1986	8	1	4	2	1	1	1	1	1	1	2	3	6	2	2	3	3	2	2	2	2	1	0	1	0	0	0	0	0	0	0	0
1104043	2	1959	5	2	4	3	1	1	1	1	2	1	6	2	6	4	3	2	3	3	3	3	2	0	1	0	0	0	0	0	0	0	0	0	2
83591633866391373	1	1991	8	2	1	1	1	1	1	1	1	1	3	4	3	4	4	3	3	3	2	3	3	1	0	0	0	0	0	0	0	0	0	0	2
1104015	1	1968	7	1	4	3	1	1	1	6	6	3	6	4	3	3	4	3	3	3	2	-1	3	1	0	0	0	0	0	0	0	0	0	0	2
1104017	1	1983	8	2	1	2	1	1	2	4	1	2	3	4	5	4	4	3	3	3	3	3	3	1	0	0	0	1	0	0	0	0	0	0	1
83521633841878861	1	1963	6	2	1	3	1	1	2	6	2	4	6	4	6	3	3	3	2	2	2	3	3	0	0	0	0	0	0	0	0	0	0	0	1
83511633841852575	1	1981	8	2	2	3	1	1	1	2	1	1	1	3	6	3	2	3	3	3	2	2	2	0	0	1	0	0	0	0	0	0	0	0	1
1104021	1	1953	3	3	4	3	3	1	1	6	6	6	6	4	6	-1	3	2	2	3	2	3	3	0	0	0	0	0	0	0	0	0	0	0	2
83641633852159543	2	2000	8	1	4	2	4	1	2	1	1	5	1	3	6	4	3	3	3	2	2	3	3	0	0	0	0	0	0	0	0	0	0	0	1
83401633845802537	1	1984	8	2	4	2	1	1	4	1	2	2	2	4	5	3	2	2	3	3	2	3	3	0	0	0	0	0	0	0	0	0	0	0	1
3103016	1	1983	9	2	3	2	1	1	1	1	1	1	1	1	4	3	3	3	3	3	3	3	3	1	0	1	1	1	1	0	0	1	0	0	1
3102001	2	1957	1	5	4	2	3	2								4	4	4	4	4	4	4	4	0	0	0	0	0	0	0	0	0	0	0	1
83611633842067942	2	1960	4	2	1	3	3	1	1	5	4	6	1	6	6	4	4	4	4	3	2	4	3	0	0	0	0	0	0	0	1	1	0	0	1
3103024	2	1954	3	2	4	3	3	2								3	3	3	4	3	3	3	3	0	0	0	0	0	0	0	0	0	0	0	1
3102025	1	1972	3	2	4	3	1	1	2	2	1	6	4	2	6	3	3	2	2	3	2	2	2	0	0	0	0	0	0	0	0	0	0	0	2
3103023	2	1980	8	2	4	2	1	1	1	1	1	6	2	2	6	3	3	3	3	3	3	3	3	0	0	0	0	0	0	0	0	0	0	0	1
3103006	1	1954	2	3	4	3	3	2								3	4	4	4	4	4	4	4	0	0	0	0	0	0	0	0	0	0	0	1
3102011	2	1980	7	4	4	2	1	1	3	1	1	1	6	1	6	3	3	3	3	3	2	2	3	0	0	0	0	0	0	0	0	0	0	0	2
3103013	1	1985	8	2	4	3	1	1	1	1	1	1	1	4	4	3	3	3	3	3	2	3	3	0	0	0	0	0	0	0	0	0	0	0	1
3102003	2	1994	8	1	4	2	1	1	1	1	1	1	1	1	6	3	1	2	3	3	2	3	1	1	1	1	0	0	0	0	0	1	0	0	3
3102008	2	1983	8	2	4	1	1	1	1	4	4	1	6	2	3	4	3	2	3	2	3	3	2	0	0	0	0	0	0	0	0	0	0	0	1
3102017	1	1958	4	2	2	3	3	2								4	3	3	3	3	3	3	3	0	0	0	0	0	0	0	0	0	0	0	1
3103010	1	1963	3	5	4	3	1	1	3	6	6	6	6	4	6	4	3	3	3	3	2	3	3	0	0	0	0	0	0	0	0	0	0	0	1
3102002	1	1993	8	1	1	3	1	1	2	2	1	1	3	2	2	3	3	3	3	2	2	2	2	0	1	0	0	0	0	0	0	0	0	0	3
4445025	1	1977	3	2	4	1	1	2								3	-1	3	3	3	3	3	2	0	0	0	0	0	0	0	0	0	0	0	2
88191633416104245	1	1981	3	2	4	1	1	2								-1	1	-1	-1	3	3	3	-1	0	0	0	0	0	0	0	0	0	0	0	2
4445012	1	1989	5	1	4	1	1	1	2	2	4	6	6	4	6	4	3	2	4	3	1	3	1	0	0	0	0	0	0	0	0	0	0	0	2
4445001	1	1973	3	2	4	1	1	1	1	1	1	6	6	4	6	2	2	2	2	2	2	3	1	0	0	0	0	0	0	0	0	0	0	0	2
88161633401285793	1	1984	2	2	4	1	1	1	2	2	1	6	2	2	6	3	3	3	3	3	3	3	3	0	0	0	0	0	1	0	0	1	0	0
4445011	2	1991	8	1	4	2	1	1	3	1	1	4	4	2	5	3	1	2	3	3	2	2	2	0	0	0	0	0	0	0	0	0	0	0	2
88161633399021025	1	1987	7	3	4	2	1	1	1	3	1	1	1	2	6	3	3	3	3	3	2	3	3	1	0	0	0	0	0	0	1	0	0	0	3
4445010	2	1982	4	4	4	1	1	1	2	1	1	6	6	2	6	3	2	2	-1	2	2	2	2	0	0	0	0	0	0	0	0	0	0	0	2
88191633417349635	1	1999	8	1	2	1	1	1	3	1	1	1	6	4	5	3	3	4	3	3	3	3	3	0	0	0	0	0	0	0	0	0	0	0
4445019	1	2001	3	1	2	2	1	1	2	1	1	1	4	3	6	4	4	4	4	3	2	2	3	1	0	0	0	0	0	0	0	0	0	0
4445015	1	1972	5	2	4	3	1	1	1	2	1	1	1	1	5	2	2	3	2	3	1	3	2	1	0	0	0	1	0	0	1	1	0	0	3
88801633503801581	2	1995	4	1	4	1	1	1	3	2	2	1	5	2	3	3	2	3	3	3	3	3	3	0	0	0	0	0	0	0	0	0	0	0	2
3312023	2	2002	7	1	2	1	4	1	3	1	1	5	2	2	4	4	3	3	3	3	3	4	3	0	0	0	0	0	0	0	0	1	0	0
4445004	1	1967	4	4	4	3	1	1	1	1	1	6	3	2	6	4	4	3	2	3	3	2	3	1	0	0	0	0	0	0	0	0	0	0	1
60371633500563866	1	1977	8	2	4	2	1	1	1	1	1	1	5	2	6	3	2	3	3	3	3	3	3	0	1	0	0	0	1	0	1	1	0	0	1
88801633496665510	2	1996	3	2	4	3	1	1	2	1	5	6	6	1	6	3	3	3	3	3	3	3	3	0	0	0	0	0	0	0	0	0	0	0	3
88811633495513812	1	1993	4	1	2	1	1	2								3	2	2	2	2	2	2	2	0	0	0	0	0	0	0	0	0	0	0	2
88291633484341550	1	1961	7	2	1	2	3	1	1	3	6	6	5	4	6	3	3	2	2	3	2	2	2	0	0	0	0	0	0	0	1	0	0	0	2
4445002	2	1973	3	4	4	3	1	1	3	2	1	6	6	4	6	3	3	3	2	3	3	2	2	0	0	0	0	0	0	0	0	0	0	0	2
88281633440044190	1	1996	5	1	4	2	1	1	2	1	1	1	1	1	4	4	3	3	3	3	3	3	3	0	0	0	0	0	0	0	0	0	0	0	2
88291633435201044	2	1997	7	1	1	1	1	1	3	2	1	1	2	3	3	4	4	4	4	4	4	4	4	1	0	0	0	0	0	0	0	0	0	0	2
88331633433551912	1	1968	7	2	1	3	2	1	1	1	1	1	1	1	6	3	3	3	3	3	2	2	3	0	0	0	0	0	0	0	0	0	0	0	3
88391633424772237	1	1978	3	2	4	1	1	1	1	5	1	6	6	4	4	3	3	3	3	3	3	3	3	0	0	0	0	0	0	0	0	0	0	0	3
88371633422436310	1	1981	4	2	4	1	1	1	1	2	6	6	5	4	5	3	1	2	3	3	2	1	1	0	0	0	0	0	0	0	0	1	0	0	3
4401023	1	1971	2	2	4	1	1	2								4	3	3	2	4	1	1	1	0	0	0	0	0	0	0	0	0	0	0	2
3312021	2	1991	8	1	4	3	1	1	2	1	1	1	3	3	4	4	4	4	3	3	3	4	2	0	1	0	0	0	0	0	0	1	0	0	3
4401007	2	1989	2	2	4	1	3	1	1	1	1	6	1	2	6	-1	-1	-1	-1	-1	-1	-1	-1	0	0	0	0	0	0	0	0	0	0	0	3
88401633421112764	1	1954	3	2	4	3	1	1	1	1	1	2	2	6	1	-1	3	3	2	3	2	2	3	0	0	0	0	0	0	0	0	0	0	0	3
88371633420928421	1	1996	8	1	2	3	1	1	3	1	1	6	2	2	6	3	1	3	3	3	3	3	3	1	0	0	0	0	0	0	0	0	0	0	1
88411633420126675	1	1998	8	1	2	1	3	1	1	1	1	1	1	1	1	2	3	3	3	2	2	3	2	1	0	0	0	0	0	0	0	0	0	0	2
60371633420029952	2	1980	8	2	4	3	3	1	6	1	1	6	6	6	6	1	1	3	3	3	1	2	2	0	0	0	0	0	0	0	0	0	0	0	2
88321633419419683	2	1975	1	2	4	1	2	2								4	1	-1	2	4	-1	-1	1	0	0	0	0	0	0	0	0	0	0	0	2
88771633418914584	1	1979	2	2	4	2	1	1	2	1	1	6	6	5	6	3	2	3	3	3	3	3	3	0	0	0	0	0	0	0	0	0	0	0	2
4401010	2	1956	4	2	4	3	3	2								4	4	3	3	2	3	4	2	0	0	0	0	0	0	0	0	0	0	0	2
88361633417555326	1	1991	8	1	4	3	1	1	1	1	1	1	6	2	6	2	2	2	3	3	2	3	3	0	0	0	0	0	0	0	0	0	0	0	1
3312010	2	1990	8	2	1	2	1	1	5	3	1	1	2	1	3	3	3	3	3	3	3	3	3	0	0	0	0	0	0	0	0	0	0	0	1
3312007	2	1988	7	2	4	1	1	1	2	2	2	2	3	2	6	3	3	3	3	3	3	3	3	0	0	0	0	0	0	0	0	0	0	0	2
88481633405431855	1	1991	3	2	4	2	1	1	6	6	6	2	6	6	1	3	2	2	2	2	1	2	1	0	0	0	0	0	0	0	0	0	0	0	2
88371633404764014	1	1972	3	2	4	1	1	1	1	6	2	6	6	4	6	3	2	2	2	2	2	2	2	1	0	1	0	0	0	0	1	0	0	1	3
4405024	2	1973	3	2	4	3	1	1	1	1	1	3	3	2	1	3	3	3	3	3	3	3	3	1	0	0	0	0	0	0	0	0	0	0	1
88441633403836197	1	1965	4	2	4	1	1	1	1	1	1	6	5	2	6	4	2	2	2	2	2	2	2	0	0	0	0	0	0	0	0	0	0	0	2
60321633403462960	2	1985	7	2	4	2	1	1	5	1	1	1	1	1	6	4	2	1	2	2	3	2	2	0	1	0	0	0	0	0	0	0	0	0	1
4445024	1	1985	3	2	1	1	2	1	2	1	2	1	5	4	6	3	3	3	4	3	3	3	3	0	0	0	0	0	0	0	0	0	0	0	2
4401020	1	1969	7	2	1	3	1	1	1	2	1	1	3	1	1	4	4	4	3	3	2	3	2	1	0	0	0	0	0	0	0	0	0	0	2
4401006	1	1965	4	2	1	2	2	1	1	1	1	1	3	6	6	4	4	4	4	4	4	4	4	0	0	0	0	0	0	0	0	0	0	0	2
88391633402210141	2	1963	3	5	4	2	3	1	1	2	1	6	2	6	6	2	3	-1	-1	3	2	2	2	0	0	0	0	0	0	0	0	0	0	0	1
3312001	1	1965	2	2	4	4	3	2								4	1	-1	4	1	1	-1	-1	0	0	0	0	0	0	0	0	0	0	0	3
4401019	2	1983	5	2	4	3	1	1	6	1	1	1	6	3	6	4	3	4	3	3	3	3	3	0	0	0	0	0	0	0	0	0	0	0	2
88411633400170076	2	1985	7	2	4	1	1	1	2	1	1	1	2	2	5	3	3	3	4	3	3	3	3	0	0	0	0	0	0	0	1	0	0	0	3
3312015	2	2000	8	1	2	1	4	1	2	1	1	6	3	2	4	3	3	3	3	3	3	3	3	0	0	0	0	0	0	0	0	0	0	0	1
4405023	1	1981	8	3	4	3	1	1	1	1	1	1	1	1	6	3	3	1	3	3	1	3	3	0	1	0	0	0	0	0	0	0	0	0	2
4445021	2	1957	2	5	4	1	3	2								-1	-1	-1	-1	-1	-1	-1	-1	0	0	0	0	0	0	0	0	0	0	0	2
4401024	2	1978	3	2	4	3	1	1	2	1	1	1	1	1	1	3	3	3	3	3	3	3	3	0	0	0	0	0	0	0	0	0	0	0	2
4401016	1	1981	7	2	4	2	2	1	1	4	1	1	1	1	1	3	3	3	3	3	3	3	2	0	0	1	0	1	0	0	0	0	0	0	2
88471633341721825	2	1979	3	2	4	2	1	2								4	3	-1	3	-1	3	-1	3	0	0	0	0	0	0	0	0	0	0	0	2
88421633396571619	1	1999	3	1	4	1	1	1	1	1	1	3	3	2	6	3	4	3	3	2	2	2	2	0	0	0	0	0	0	0	0	0	0	0	3
88421633354254348	2	1973	3	3	4	1	1	1	2	1	2	6	6	5	6	3	3	3	3	3	2	3	2	0	0	0	0	0	0	0	0	0	0	0	2
88471633319383453	2	1973	5	3	4	2	1	2								3	3	3	3	3	3	3	3	0	0	0	0	0	0	0	0	0	0	0	2
4434020	1	1980	3	2	4	1	1	1	1	2	1	6	3	3	6	3	-1	3	3	3	3	3	3	0	0	0	0	0	0	0	0	0	0	0	2
3312022	2	1986	7	2	4	1	1	1	2	3	1	1	2	2	4	3	3	3	3	3	3	3	3	0	0	0	0	0	0	0	0	0	0	0	3
3312020	1	1985	8	2	4	2	1	1	3	1	1	1	4	2	4	2	1	2	3	2	2	3	2	1	0	1	0	0	0	0	0	0	0	0	1
88181633341473563	1	1971	5	4	4	1	1	1	2	2	2	6	6	4	6	2	1	2	2	-1	-1	-1	-1	0	0	0	0	0	0	0	0	0	0	0	3
88441633340240131	1	1987	3	2	4	3	1	1	3	2	1	6	6	2	6	-1	-1	-1	-1	2	-1	-1	-1	0	0	0	0	0	0	0	0	1	0	0	2
4405010	2	1977	7	2	4	3	1	1	4	1	1	1	3	3	4	3	3	3	3	2	3	2	3	1	0	0	0	0	0	0	0	0	0	0	1
88431633336964283	1	2000	8	1	1	1	4	1	2	1	1	2	2	3	3	3	3	3	3	3	3	3	3	0	0	0	0	0	0	0	0	0	0	0
3312018	2	1985	7	2	4	1	1	1	1	1	1	1	6	2	6	2	3	3	3	3	2	3	2	0	0	0	0	0	0	0	0	0	0	0	1
4405013	2	1990	9	2	1	3	1	1	1	1	1	6	1	1	2	2	2	3	2	1	1	1	2	1	0	0	0	0	0	0	0	1	0	0	1
60371633335938587	1	1955	3	3	4	3	1	2								3	1	1	1	3	1	1	1	0	0	0	0	0	0	0	0	0	0	0	1
4401011	1	1991	4	2	4	1	1	1	1	1	1	2	2	3	6	3	3	3	2	2	1	1	1	1	0	0	0	0	0	0	0	0	0	0	3
4405005	2	1989	7	2	4	3	1	1	1	1	1	1	1	3	6	4	3	3	3	2	2	3	3	0	0	0	0	0	0	0	0	0	0	0	1
4401013	1	1978	3	2	4	1	1	1	3	2	1	1	1	3	6	3	3	4	4	3	3	3	3	0	0	0	1	0	0	0	0	1	0	0	2
4401012	2	1988	2	2	4	1	2	1	5	1	1	6	6	2	6	3	-1	-1	3	-1	-1	-1	-1	0	0	0	0	0	0	0	0	0	0	0	2
4401004	1	1994	7	1	4	2	1	1	3	1	1	1	5	4	1	4	3	2	3	2	2	3	2	0	0	0	0	0	0	0	0	0	0	1	2
4434002	2	1991	5	2	2	1	1	1	6	1	1	1	6	4	6	3	3	3	2	3	3	3	3	0	0	0	0	0	0	0	0	0	0	0	2
88771633333140422	2	1981	2	2	4	1	1	1	6	1	1	6	6	6	6	4	4	4	4	4	4	4	4	0	0	0	0	0	0	0	0	0	0	0	3
4405022	1	1971	3	2	4	3	1	1	2	2	3	6	6	3	2	3	3	3	3	3	3	2	2	1	0	0	0	0	0	0	0	0	0	0	1
3309014	1	1983	4	2	4	1	1	1	5	2	1	6	1	4	6	3	3	3	3	3	2	3	2	0	0	0	0	0	0	0	0	0	0	0	3
4405017	1	1970	5	2	4	3	3	1	6	6	6	6	6	6	5	4	3	1	2	3	3	3	3	0	0	0	0	0	0	0	0	0	0	0	2
4405007	2	1983	4	2	4	2	3	1	4	2	1	6	2	4	6	3	-1	-1	4	-1	2	-1	-1	0	0	0	0	0	0	0	0	0	0	0	3
3309001	1	1964	3	2	2	1	3	2								3	2	2	3	2	2	2	3	0	0	0	0	0	0	0	0	0	0	0	1
3309011	2	1989	3	2	4	3	3	1	1	1	1	6	3	2	6	3	4	4	3	3	3	4	4	0	0	0	0	0	0	0	0	0	0	0	2
3309015	1	1977	3	2	4	1	1	1	1	1	1	6	6	1	6	1	3	2	2	2	2	2	1	0	0	0	0	0	0	0	0	0	0	0	2
3309012	2	1971	2	2	4	1	1	2								4	-1	-1	-1	-1	-1	-1	-1	0	0	0	0	0	0	0	0	0	0	0	3
3309009	2	2003	3	1	4	2	1	1	4	1	2	2	2	2	6	3	3	3	3	3	3	3	3	0	0	0	0	0	0	0	0	0	0	0	3
3309024	2	1974	3	2	4	1	1	1	2	1	1	6	2	2	6	3	3	3	3	4	4	4	4	0	0	0	0	0	0	0	0	0	0	0	2
3309005	1	2003	7	1	4	1	4	1	3	1	1	2	1	2	6	3	2	3	3	2	2	2	2	1	0	0	0	0	0	0	0	0	0	0	3
88251633323613613	1	1955	4	2	1	2	1	1	1	6	1	6	6	6	6	3	3	3	3	2	3	4	3	0	0	0	0	0	0	0	0	0	0	0	1
3309018	2	2002	3	1	4	3	1	1	2	1	1	2	6	3	6	3	2	3	3	2	3	3	2	0	0	0	0	0	0	0	0	0	0	0
3309013	2	2000	6	1	4	3	1	1	6	1	1	2	3	1	6	4	4	4	4	4	4	4	4	0	0	0	0	0	0	0	0	0	0	0	3
3309003	2	1986	3	2	4	1	1	2								-1	2	3	3	3	1	1	1	0	0	0	0	0	0	0	0	0	0	0	3
88451633318706262	2	1955	1	5	4	1	3	2								-1	-1	2	1	1	1	1	1	0	0	0	0	0	0	0	0	0	0	0	2
88441633317767647	1	2002	3	1	4	1	1	1	6	1	1	2	6	3	6	4	4	4	4	2	2	3	3	0	0	0	0	0	0	0	0	0	0	0
88431633317888865	1	1977	5	2	4	1	1	1	1	3	1	6	2	5	6	4	3	3	3	2	3	3	3	0	0	0	0	0	0	0	0	0	0	0	2
88211633245870899	2	1985	2	2	4	1	1	1	6	3	4	6	6	5	6	3	3	4	3	3	3	-1	2	0	0	0	0	0	0	0	0	0	0	0	2
4434024	2	1973	3	2	4	1	1	1	1	1	1	6	6	4	6	4	4	4	4	4	3	4	4	0	0	0	0	0	0	0	0	0	0	0	1
3309021	2	1989	3	1	4	1	1	1	2	5	1	2	6	3	6	3	3	3	3	3	3	3	3	0	0	0	0	0	0	0	0	0	0	0	3
3309002	1	1988	3	1	4	2	3	1	1	3	1	6	6	2	6	3	3	3	3	3	3	3	3	0	0	0	0	0	0	0	0	0	0	0	1
3309017	2	1967	3	2	4	1	1	2								2	-1	3	3	-1	-1	3	-1	0	0	0	0	0	0	0	0	0	0	0	3
3309004	1	1975	3	2	4	1	1	1	1	2	4	6	6	3	6	4	3	3	3	3	3	3	3	0	0	0	0	0	0	0	0	0	0	0	2
4434009	1	1986	5	2	2	1	3	1	3	3	1	6	6	4	6	3	3	2	2	2	2	3	2	0	0	0	0	0	0	0	0	0	0	0	3
4434015	2	1987	3	4	4	1	2	1	1	1	1	6	6	1	1	4	3	2	3	2	2	2	3	0	0	0	0	0	0	0	0	0	0	0	2
4446001	2	1964	2	2	4	1	3	2								3	3	3	3	3	3	3	2	0	0	0	0	0	0	0	0	0	0	0	2
4434007	2	1961	4	2	4	1	3	1	1	1	2	6	2	6	6	-1	4	4	4	4	4	4	4	0	0	0	0	0	0	0	0	0	0	0	2
88161633309911849	1	1996	4	1	2	3	1	1	3	1	1	1	3	1	5	4	4	4	3	3	3	3	3	1	0	0	0	0	0	0	0	1	1	0	2
88221633253947386	2	1971	2	2	4	1	1	1	3	1	1	6	3	2	6	3	3	-1	2	3	3	2	2	0	0	0	0	0	0	0	0	0	0	0	1
88411633307439957	1	2002	6	1	4	3	1	1	1	1	1	1	4	4	6	3	2	3	3	3	3	3	3	0	0	0	0	0	0	0	0	0	0	0	1
80291633223320464	2	1952	1	2	4	1	1	2								-1	-1	4	1	3	3	2	-1	0	0	0	0	0	0	0	0	0	0	0	1
3312008	1	1992	7	1	4	3	1	1	2	2	1	6	4	1	6	4	4	4	3	3	3	3	3	0	0	0	0	0	0	0	0	0	0	0
88781633268043724	2	2003	7	1	2	3	4	1	6	1	1	6	3	2	6	2	2	2	2	2	2	2	2	0	0	0	0	0	0	0	0	0	0	0	3
88341633242693255	1	1971	4	2	4	3	2	1	1	5	4	1	6	4	6	4	4	4	4	4	3	4	3	0	0	0	0	0	0	0	0	0	0	0	2
88401633264786139	1	1985	3	1	4	1	1	1	1	1	1	1	6	4	6	-1	3	3	3	3	3	3	3	1	0	0	0	0	0	0	0	0	0	0	1
88291633248918020	1	1956	4	2	4	3	3	1	1	6	1	6	6	3	6	4	3	3	2	3	2	3	3	0	0	0	0	0	0	0	0	0	0	0	2
88361633250025102	2	1975	2	4	4	1	1	1	1	1	2	6	6	4	6	4	-1	4	4	4	4	4	4	0	0	0	0	0	0	0	0	0	0	0	2
88401633142894121	2	2001	7	1	2	1	4	1	2	1	1	1	2	2	5	2	3	3	3	2	2	3	3	1	0	0	0	0	0	0	0	0	0	0	3
88301633260649728	2	1977	3	2	4	3	1	1	1	1	1	1	1	1	1	4	4	4	4	4	4	4	4	0	0	0	0	0	0	0	0	0	0	0	1
88341633253135188	2	1976	7	2	4	3	1	1	2	3	3	1	2	3	4	4	4	4	4	4	4	4	4	0	0	0	0	0	0	0	0	0	0	0	2
88231633259208097	1	1962	4	2	4	2	1	1	1	2	3	6	6	6	6	3	3	3	3	3	3	2	3	0	0	0	0	0	0	0	0	0	0	0	1
88211633258361392	2	1982	7	2	4	1	1	1	1	4	1	1	1	3	4	4	-1	-1	3	3	-1	2	1	1	0	0	0	0	0	0	0	1	0	0	2
88781633255974128	1	1975	3	2	4	1	2	2								3	4	3	2	3	3	2	2	0	0	0	0	0	0	0	0	0	0	0	1
80261633254057722	1	1973	2	2	4	1	3	2								4	4	4	4	3	3	3	1	0	0	0	0	0	0	0	0	0	0	0
80291633222807510	2	1954	3	2	4	1	1	2								-1	1	-1	1	-1	-1	-1	-1	0	0	0	0	0	0	0	0	0	0	0	1
88301633254961198	1	1983	8	2	1	1	1	1	1	1	1	1	1	1	1	3	4	3	3	3	3	3	3	0	0	0	0	0	0	0	0	0	0	0	2
88771633253424904	1	1966	2	2	4	1	3	2								3	1	1	1	3	3	2	3	0	0	0	0	0	0	0	0	0	0	0	1
3311002	2	1972	3	2	4	1	1	1	6	6	6	2	2	4	6	2	3	3	2	2	2	2	2	0	0	0	0	0	0	0	0	0	0	0	1
88311633144372976	2	1952	4	5	4	2	3	1	1	6	2	6	6	6	6	3	4	4	2	4	2	2	3	0	0	0	0	0	0	0	0	0	0	0	2
88211633136204619	2	1953	1	5	4	1	1	2								-1	3	-1	-1	4	-1	4	-1	0	0	0	0	0	0	0	0	0	0	0	2
3311012	1	1983	3	2	4	1	1	1	2	2	1	3	2	4	6	3	2	2	2	-1	3	3	3	0	0	0	0	0	0	0	0	0	0	0
4403007	1	1993	4	2	4	1	1	1	1	2	2	2	2	2	2	4	2	2	3	3	3	2	2	1	0	0	0	0	0	0	0	0	0	0	2
3311008	2	1973	2	2	4	1	1	2								3	2	3	3	3	3	3	2	0	0	0	0	0	0	0	1	0	0	0	1
88241633189193610	1	1958	4	2	4	2	3	2								3	3	3	3	3	3	2	3	1	0	0	0	0	0	0	0	0	0	0	2
3311024	2	1980	8	5	2	1	1	1	2	6	6	6	3	4	6	4	4	4	4	4	2	3	3	0	0	1	0	0	0	0	0	0	0	0	2
3311015	1	1973	2	2	4	1	1	2								3	3	3	3	3	2	2	2	0	0	0	0	0	0	0	0	0	0	0	1
3311001	1	1987	7	2	4	1	1	1	2	1	1	2	3	4	6	3	2	2	2	2	1	2	2	1	0	0	0	0	0	0	0	0	0	0	1
88271633245055805	1	1957	3	2	4	1	3	1	3	6	3	6	6	6	6	2	2	3	2	2	2	2	2	0	0	0	0	0	0	0	0	0	0	0	2
88411633244631005	2	1972	3	2	4	1	1	2								3	2	3	2	3	2	1	1	0	0	0	0	0	0	0	0	0	0	0	3
88191633243312216	2	1975	3	2	4	1	1	1	1	1	1	6	6	2	6	2	3	3	3	3	3	3	3	0	0	0	0	0	0	0	0	0	0	0	1
3311021	2	1975	3	2	1	1	3	2								4	3	3	2	-1	2	3	3	0	0	0	0	0	0	0	0	0	0	0	1
3311020	2	1998	7	1	2	1	1	1	4	1	1	1	3	3	5	3	3	3	2	2	2	2	2	1	0	0	0	0	0	0	0	0	0	0	2
88401633241681080	2	1959	2	2	4	1	1	2								4	3	3	3	3	3	3	3	0	0	0	0	0	0	0	0	0	0	0	1
3311025	2	1976	3	2	4	1	1	2								1	1	1	2	2	2	3	1	0	0	0	0	0	0	0	0	0	0	0	1
3311022	2	1980	3	2	4	1	1	2								3	3	3	3	3	3	3	3	0	0	0	0	0	0	0	0	0	0	0	1
88251633237683595	1	1970	4	2	4	1	1	1	1	1	1	6	6	4	5	3	3	3	2	3	2	2	2	1	0	0	0	0	0	0	1	0	0	0	1
88231633236027860	2	1971	3	2	4	1	1	1	2	3	2	6	6	6	6	3	3	3	3	3	3	2	3	0	0	0	0	0	0	0	0	0	0	0	1
80251633212810063	1	1991	3	1	4	1	1	1	2	1	5	6	6	6	6	-1	-1	1	2	2	3	2	2	0	0	1	0	0	0	0	0	0	0	0	3
88221633185931999	2	1958	3	5	4	1	3	2								3	3	3	3	3	3	3	3	0	0	0	0	0	0	0	0	0	0	0	2
3311003	1	1988	3	2	4	1	1	1	3	1	1	1	3	6	6	3	3	3	2	2	2	2	2	0	0	0	0	0	0	0	0	0	0	0	2
80261633231986772	1	1968	2	2	4	1	3	2								4	4	-1	3	3	-1	-1	1	0	0	0	0	0	0	0	0	0	0	0	1
88391633228146053	2	1980	5	4	4	3	1	1	1	2	1	2	5	2	6	3	3	2	3	3	3	2	3	0	0	0	0	0	0	0	0	0	0	0	1
88201633227042386	1	1968	3	2	4	1	2	1	2	1	1	6	5	4	6	3	2	3	2	3	2	3	2	0	0	0	0	0	0	0	0	0	0	0	1
88481633228660858	1	1991	3	2	4	1	1	2								3	1	3	3	3	3	2	2	0	0	0	0	0	0	0	0	0	0	0	2
88181633229319523	1	1952	2	2	4	1	3	1	1	1	6	6	6	6	6	4	3	3	3	3	2	3	3	0	0	0	0	0	0	0	0	0	0	0	1
88381633229226269	2	1957	2	2	4	3	3	2								3	4	4	4	4	-1	2	2	0	0	0	0	0	0	0	0	0	0	0	1
3311014	2	1979	4	2	4	1	1	1	5	1	2	1	5	5	6	4	3	3	3	2	2	2	2	0	0	0	0	0	0	0	0	0	1	0	2
88311633151244387	1	1978	7	2	4	2	2	1	1	1	1	1	1	2	1	3	2	2	2	2	2	2	2	0	0	0	0	0	0	0	0	0	0	0	2
3311019	2	1964	3	2	4	1	1	2								3	2	-1	3	3	3	3	2	0	0	0	0	0	0	0	1	0	1	0	1
88491633228688535	1	1973	2	2	4	1	3	2								4	2	-1	3	2	2	3	3	0	0	0	0	0	0	0	0	0	1	0	1
88451633228490942	2	1980	3	2	4	1	3	1	6	1	1	6	6	4	6	3	3	4	3	3	2	3	3	0	0	0	0	0	0	0	0	0	0	0	1
3311013	1	1962	3	2	4	1	3	2								4	1	2	3	3	3	2	1	0	0	0	0	0	0	0	0	0	0	0	1
88401633227911799	2	1988	3	2	4	1	3	1	1	1	1	6	6	2	6	3	3	3	3	3	3	3	3	0	0	0	0	0	0	0	0	0	0	0	3
3311004	1	1989	3	2	4	1	1	1	2	2	1	6	6	4	6	3	3	3	3	3	-1	-1	-1	0	0	1	0	0	0	0	0	0	0	0	3
88331633225700442	2	1994	5	1	2	2	2	1	1	1	1	1	1	1	2	3	2	3	3	3	3	3	3	0	0	0	0	0	0	0	0	0	0	0	2
88461633227629686	1	1971	4	2	4	1	1	2								3	1	3	3	2	1	1	2	0	0	0	0	0	0	0	0	0	0	0	2
88391633226167742	2	1984	2	2	4	1	1	1	5	1	1	6	6	2	6	3	2	3	3	3	2	3	2	0	0	0	0	0	0	0	0	0	0	0	3
88301633225848503	2	1987	7	2	4	3	1	1	1	1	1	1	1	1	5	3	3	3	3	3	3	3	3	0	0	0	0	0	0	0	0	0	0	0	2
88231633221981061	2	1973	4	2	4	1	1	1	1	3	3	3	1	4	6	3	3	3	3	2	2	3	3	0	0	0	0	0	0	0	0	0	0	0	1
88241633189832905	1	1963	4	2	4	1	2	1	2	6	2	6	2	6	6	4	4	4	3	3	2	2	2	0	0	0	0	0	0	0	0	0	0	0	2
88221633188853095	2	1989	3	2	4	1	3	1	5	1	1	2	1	6	6	4	3	3	3	3	3	3	3	0	0	0	0	0	0	0	0	0	0	0	1
4436014	1	1987	3	2	4	1	1	1	4	1	1	6	6	3	6	4	4	4	2	1	1	1	1	0	0	0	0	0	0	0	0	0	0	1
88411633173980122	2	1990	3	2	4	3	2	1	3	2	1	1	2	4	6	3	3	3	3	3	3	3	3	0	0	0	0	0	0	0	0	0	0	0	1
88431633224218306	1	1974	4	2	1	1	1	1	1	5	1	6	3	2	6	3	3	3	3	2	2	3	2	0	0	0	0	0	1	0	1	1	0	0	1
4436018	1	1995	8	1	2	3	2	1	4	3	3	6	4	3	4	3	3	3	3	3	2	3	2	0	0	0	0	0	0	0	0	0	0	0	2
80261633214512865	2	1987	3	2	4	3	3	1	6	6	2	6	3	5	6	3	3	3	3	3	3	1	1	0	0	0	0	0	0	0	0	0	0	0	1
80281633213944089	1	1987	3	2	4	1	3	1	1	6	3	6	6	4	6	4	3	3	3	2	2	3	2	0	0	0	0	0	0	0	0	0	0	0	2
88161633179014461	2	1983	3	2	4	1	2	1	1	1	1	6	1	3	6	4	3	3	3	3	2	2	2	0	0	0	0	0	0	0	0	1	0	0	2
80261633161840128	2	1960	3	2	4	1	3	2								3	4	4	2	2	1	1	1	0	0	0	0	0	0	0	0	0	0	0	2
88171633166921925	2	1964	4	5	4	2	3	1	3	1	5	6	6	3	6	3	3	3	3	3	3	3	3	0	0	0	0	0	0	0	0	0	0	0	2
88371633165489205	1	1992	5	1	4	3	1	1	4	3	2	1	6	2	6	3	3	3	3	3	3	3	3	0	0	0	0	0	0	0	0	0	0	0	3
4436010	1	1972	3	4	4	1	3	1	1	1	1	5	6	1	6	-1	-1	-1	2	-1	1	-1	1	0	0	0	0	0	0	0	0	0	0	0	2
80291633162309768	1	1958	3	2	4	1	3	2								3	3	3	-1	-1	1	3	2	0	0	0	0	0	0	0	0	0	0	0	2
88431633161785831	2	1969	2	2	4	1	1	1	6	6	6	6	6	4	6	3	3	3	3	2	3	3	3	0	0	0	0	0	0	0	0	0	0	0	2
88381633160865083	1	1956	2	2	4	1	3	2								4	4	3	4	4	2	4	3	0	0	0	0	0	0	0	0	0	0	0	2
4408014	1	1986	5	2	4	3	3	1	1	1	3	6	6	4	6	3	3	3	3	3	3	3	3	0	0	0	0	0	0	0	0	0	0	0	1
4436013	1	1971	2	1	4	1	3	1	2	6	2	6	2	6	6	3	3	-1	-1	3	2	3	3	0	0	0	0	0	0	0	0	0	0	0	1
88321633151180585	2	1988	8	2	2	2	3	1	1	1	1	1	1	1	1	3	3	3	3	3	3	3	3	1	0	0	0	0	0	0	0	0	0	0	2
4446019	1	1989	6	2	4	1	1	1	5	1	2	1	4	4	6	3	3	3	-1	3	3	3	3	0	0	0	0	0	0	0	0	0	0	0	2
4408009	2	1972	5	2	4	3	1	1	3	3	2	6	6	6	6	3	4	4	4	3	3	3	3	0	0	0	0	0	0	0	0	0	0	0	1
4436020	2	1984	3	2	4	1	3	2								4	3	-1	1	2	3	4	1	0	0	0	0	0	0	0	0	0	0	0	3
4403014	2	1984	8	2	4	2	1	1	2	2	2	2	2	2	2	3	3	3	3	3	3	3	3	0	0	0	0	0	0	0	0	0	0	0	2
4436007	1	1957	2	2	4	1	1	1	1	4	5	6	6	6	6	3	3	3	3	3	3	-1	2	0	0	0	0	0	0	0	0	0	0	0	1
4436019	2	1954	2	5	4	1	3	2								4	-1	-1	3	2	-1	4	-1	0	0	0	0	0	0	0	0	0	0	0	2
4403013	2	1961	3	4	4	3	3	1	3	4	1	6	6	4	2	4	3	3	2	2	-1	-1	-1	0	0	0	0	0	0	0	0	0	0	0	2
4415022	2	1975	5	4	4	2	2	1	1	1	1	3	5	2	6	3	3	3	3	2	2	3	2	0	0	0	0	0	0	0	0	0	0	0	3
4211010	2	1972	1	3	4	1	3	2								-1	1	1	1	-1	-1	1	1	0	0	0	0	0	0	0	0	0	0	0	1
3310024	2	1987	7	2	4	1	1	1	4	2	1	1	2	2	4	3	3	2	2	3	1	2	2	1	1	1	0	0	0	0	0	0	0	1	1
4415003	1	1972	3	2	4	1	1	1	1	6	1	6	6	3	6	3	3	4	3	3	-1	-1	-1	0	0	0	0	0	0	0	0	0	0	0	3
4415019	2	1971	2	2	4	1	1	1	1	1	2	5	6	2	6	-1	-1	-1	2	2	-1	2	-1	0	0	0	0	0	0	0	0	0	0	0	2
3310006	1	1985	7	2	4	1	1	2								3	3	3	3	3	3	3	3	0	0	0	0	0	0	0	0	0	0	0	1
3310019	1	1998	8	1	2	1	1	1	2	2	1	2	2	2	2	4	4	4	4	3	3	3	3	1	0	0	0	0	0	0	0	1	0	0	1
3310009	2	1993	7	2	4	1	3	1	6	2	2	2	3	2	4	3	3	4	3	2	2	3	2	0	0	0	0	0	0	0	0	0	0	0	2
4436011	1	1965	2	2	4	1	3	2								4	3	3	3	2	2	2	1	0	0	0	0	0	0	0	0	0	0	0	1
4415013	1	1982	3	2	4	1	1	1	1	1	1	6	6	6	6	2	2	3	3	2	2	2	2	1	0	0	0	0	0	0	0	0	0	0	2
4211004	2	1968	2	2	4	1	3	1	6	3	3	6	5	4	6	-1	-1	-1	-1	-1	-1	-1	-1	0	0	0	0	0	0	0	0	0	0	0	2
4446004	1	1979	3	2	4	1	2	1	3	3	5	1	6	5	6	3	2	2	2	3	2	2	2	0	0	0	0	0	0	0	0	0	0	0	2
4446023	1	1983	5	2	4	1	1	1	1	1	1	6	6	3	6	2	3	3	3	2	2	3	3	1	0	0	0	0	0	0	0	0	0	0	2
88781633140725193	2	1988	7	2	4	1	1	1	4	1	3	1	3	4	4	3	3	3	2	3	2	2	1	0	0	0	0	0	0	0	0	0	0	0	1
4415010	1	1952	3	2	4	1	1	2								3	3	3	3	3	3	3	3	0	0	0	0	0	0	0	0	0	0	0	1
3310025	1	1992	4	2	4	1	1	1	5	4	1	1	5	4	6	3	3	3	3	3	3	3	3	0	0	0	0	0	0	0	0	0	0	0	2
4446002	2	1962	4	5	4	1	1	1	5	1	1	6	2	6	6	-1	3	3	3	-1	-1	3	3	0	0	0	0	0	0	0	0	0	0	0	1
3310022	1	1985	8	2	1	1	1	1	1	1	1	6	5	2	4	3	3	3	2	2	2	2	2	1	1	1	1	1	1	1	1	1	1	1	1
88171633136416706	2	1966	3	2	4	1	1	1	6	6	6	6	6	6	6	3	3	3	3	3	3	3	3	0	0	0	0	0	0	0	0	0	0	0	1
4436003	1	1981	2	2	4	1	2	1	2	1	6	6	6	6	6	-1	4	3	4	4	2	2	1	0	0	0	0	0	0	0	0	0	0	0	2
4436009	2	1971	2	2	4	1	1	2								3	-1	4	3	3	-1	3	2	0	0	0	0	0	0	0	0	0	0	0	2
3310013	1	1993	7	1	2	3	1	2								4	4	4	4	4	4	4	4	1	0	0	0	0	0	0	0	0	0	0	3
4436005	1	1968	3	2	4	1	1	2								3	3	3	2	2	3	2	2	0	0	0	0	0	0	0	0	0	0	0	1
4436001	2	1961	2	2	4	1	3	2								4	4	-1	3	2	2	3	1	0	0	0	0	0	0	0	0	0	0	0	2
4210020	1	1967	2	2	4	1	1	1	2	1	4	6	6	6	6	-1	2	2	-1	3	2	3	2	0	1	1	0	0	0	0	0	0	0	0	2
4212019	1	1977	2	2				1	4	5	5	6	6	4	6	3	2	3	2	1	1	2	1	0	0	0	0	0	0	1	0	0	0	0	2
4211003	2	1968	2	3	4	1	3	2								-1	2	3	2	3	-1	3	3	0	0	0	0	0	0	0	0	0	0	0	1
4211006	2	1974	2	2	4	1	1	2								-1	2	-1	-1	-1	1	2	2	0	0	0	0	0	0	0	0	0	0	0	2
88341633083456402	2	1987	7	1	1	2	1	1	1	1	1	1	1	2	6	3	3	3	3	3	3	3	3	0	0	0	0	0	0	0	0	1	0	0	1
88331633083148462	1	1964	4	2	4	3	2	1	1	6	1	6	1	5	6	4	1	3	2	1	1	1	3	0	1	1	0	0	0	0	0	1	0	0	2
4211001	1	1956	3	2	4	1	3	2								-1	-1	-1	-1	4	-1	1	2	0	0	0	0	0	0	0	0	0	0	0	2
4211018	2	1976	2	2	4	1	3	2								2	1	-1	2	2	2	3	2	0	0	0	0	0	0	0	0	0	0	0	1
4211011	1	1964	3	2	1	3	1	1	1	3	6	6	3	5	6	3	4	3	3	3	3	1	2	0	0	0	0	0	0	0	0	0	0	0	1
4211024	2	1980	2	2	4	1	1	1	3	1	6	6	6	6	6	4	1	1	3	2	3	2	1	0	0	0	0	0	0	0	0	0	0	0	1
4415001	2	1991	7	2	4	1	1	1	1	1	1	1	1	1	1	3	2	3	3	2	2	2	2	1	0	0	0	0	0	0	0	0	0	0	2
4403001	1	1964	3	2	4	3	1	1	1	5	5	2	5	5	5	3	3	3	2	2	2	1	2	0	0	0	0	0	0	0	0	0	0	0	2
88771633077836970	2	1970	1	2	4	1	1	1	3	1	1	1	2	4	6	3	4	4	4	4	4	4	4	0	0	0	0	0	0	0	0	0	0	0	1
4408022	1	1997	5	1	2	3	1	1	1	1	1	6	5	3	6	4	3	3	3	3	2	3	2	1	0	0	0	0	0	0	0	0	0	0	1
3310012	1	1970	3	2	4	3	3	2								3	3	3	3	3	1	3	2	0	0	0	0	0	0	0	0	0	0	0	2
3310011	2	1986	3	2	4	2	1	2								4	4	2	4	1	4	4	4	0	0	0	0	0	0	0	0	0	0	0	2
4446014	2	1980	4	3	4	1	2	1	1	1	1	6	6	5	6	4	3	3	3	3	3	3	3	0	0	0	0	0	0	0	0	0	0	0
4446012	1	1995	4	2	4	1	1	1	1	2	2	2	6	2	2	3	3	3	3	3	3	3	3	0	0	0	0	0	0	0	0	0	0	0	2
88801633073264097	1	1962	1	2	4	1	1	2								4	2	1	3	3	4	4	1	0	0	0	0	0	0	0	0	0	0	0	1
4408012	1	1985	7	2	4	1	1	1	1	1	1	6	3	3	6	3	3	3	3	2	2	3	2	0	0	0	0	0	0	0	0	0	0	0	2
4408016	2	1955	3	5	4	1	3	2								2	2	-1	2	2	-1	3	-1	0	0	0	0	0	0	0	0	0	0	0	1
3310004	1	1975	3	2	4	1	1	2								3	-1	3	3	3	3	3	3	0	0	0	0	0	0	0	0	0	0	0	2
3310002	1	1978	3	2	4	1	1	1	5	5	1	5	5	5	5	2	1	4	-1	3	3	-1	2	0	0	0	0	0	0	0	0	0	0	0	2
3310023	2	1976	3	2	4	1	1	1	1	1	1	6	1	3	6	3	4	4	4	4	3	3	3	0	1	0	0	0	0	0	0	0	0	0	2
3310015	1	1981	3	2	4	3	1	1	1	1	2	2	5	2	6	3	3	3	3	3	3	3	3	1	0	0	0	0	0	1	0	0	0	0	3
3310005	1	1982	5	2	4	2	1	1	2	1	6	1	6	2	6	4	3	3	3	3	3	4	3	0	0	0	0	0	0	0	0	0	0	0	1
4403024	1	1975	8	2	3	2	1	1	2	3	1	1	1	1	3	4	3	3	3	2	1	1	1	1	0	0	0	0	0	0	0	0	0	0
5101013	2	1997	9	1	2	1	4	1	1	1	1	3	1	4	6	3	3	3	3	2	2	3	2	0	0	0	0	0	0	0	0	0	0	0	2
6116016	2	1963	1	2	4	1	3	2								3	2	-1	-1	-1	-1	4	-1	0	0	0	0	0	0	0	0	0	0	0	2
83931630466109996	1	1955	3	3	4	1	3	1	1	2	6	6	6	6	6	-1	2	2	3	-1	-1	4	1	0	0	0	0	0	0	0	0	0	0	0	1
83921630466260915	1	1961	3	2	4	1	3	2								3	3	3	3	3	3	2	3	0	0	0	0	1	0	0	1	0	0	0	1
83921630466193185	2	1973	1	2	4	1	3	2								-1	-1	3	3	-1	3	3	3	0	0	0	0	0	0	0	0	0	0	0	1
83931630466091676	1	1981	4	4	4	2	1	1	1	2	1	6	6	4	5	2	2	2	2	2	2	2	2	0	0	0	0	0	0	0	0	0	0	0	3
6116003	2	1958	1	2	4	1	3	2								4	-1	-1	-1	-1	-1	3	-1	0	0	0	0	0	0	0	0	0	0	0	1
6116007	2	1982	3	2	4	1	1	2								4	4	3	3	2	2	2	3	0	0	0	0	0	0	0	0	0	0	0	1
83921630466236260	2	1962	2	2	4	1	1	2								-1	1	1	1	1	-1	-1	1	0	0	0	0	0	0	0	0	0	0	0	1
6116012	1	1985	7	2	4	1	3	1	2	1	6	6	3	6	6	3	4	3	3	3	4	3	3	0	0	0	0	0	0	0	0	0	0	0	1
6116001	2	1981	2	2	4	1	3	2								3	3	-1	-1	-1	-1	-1	-1	0	0	0	0	0	0	0	0	0	0	0	1
6116023	1	1953	3	2	1	1	3	2								-1	-1	-1	-1	-1	-1	-1	1	0	0	0	0	0	0	0	0	0	0	0	1
6116024	1	1958	2	2	4	1	3	2								3	1	2	3	-1	-1	-1	-1	0	0	0	0	0	0	0	0	0	0	0	1
6116025	2	1964	2	2	4	1	3	2								-1	-1	-1	-1	-1	-1	-1	1	0	0	0	0	0	0	0	0	0	0	0	2
6116013	2	1993	8	2	2	3	3	1	6	1	1	5	5	1	6	3	2	2	3	3	3	3	3	0	0	0	0	0	0	0	0	0	0	0	2
6116011	1	1971	1	2	4	3	3	2								4	3	3	3	2	3	3	-1	0	0	0	0	0	0	0	0	0	0	0	2
6116018	1	1954	1	2	4	1	3	2								-1	-1	-1	-1	-1	-1	4	1	0	0	0	0	0	0	0	0	0	0	0	1
6116021	2	1965	3	2	4	1	3	2								-1	-1	-1	3	1	1	3	1	0	0	0	0	0	0	0	0	0	0	0	1
6115021	1	1959	3	2	4	1	3	1	1	6	1	6	6	6	6	3	3	1	2	3	3	3	1	0	0	0	0	0	0	0	1	0	0	0	1
83921630039729184	2	1987	3	2	4	1	2	1	3	2	1	1	5	4	6	3	2	2	3	2	2	3	2	0	0	0	0	0	0	0	0	0	0	0	2
83921630039627771	2	1990	3	3	4	3	1	2								4	3	3	3	3	3	3	3	0	0	0	0	0	0	0	0	0	0	0	2
83931630039628064	1	1985	5	2	4	1	1	1	1	1	1	6	6	3	6	3	3	2	3	-1	3	-1	-1	0	0	0	0	0	0	0	0	0	0	0	3
77581629889860561	2	1991	7	2	4	1	3	1	4	1	4	6	1	1	6	4	3	2	3	3	3	3	3	0	0	0	0	0	0	0	0	0	0	0	2
77581630028009572	2	1970	7	2	4	1	1	1	3	1	5	1	6	2	5	3	3	3	3	3	3	3	3	0	0	0	0	0	0	0	0	0	0	0	2
77581629885208374	2	1979	5	2	4	2	1	1	5	1	1	3	2	2	5	3	2	2	3	2	2	3	2	0	0	0	0	0	0	0	0	0	0	0	2
81211629879803818	1	1955	4	2	4	1	3	1	1	6	6	6	6	6	6	4	3	3	3	3	2	3	3	0	0	0	0	0	0	0	0	0	0	0
83871629955116448	1	1960	3	2	4	1	1	1	1	1	4	6	6	3	6	3	3	4	3	3	2	3	3	1	0	1	0	0	0	0	0	0	1	0	1
6115004	1	1966	3	2	4	1	3	2								-1	-1	-1	-1	-1	-1	3	2	0	0	0	0	0	0	0	1	0	0	0	1
6212014	1	1990	3	2	4	1	1	1	1	3	1	6	1	4	6	3	3	4	4	2	2	3	2	0	0	0	0	0	0	0	0	0	0	0	1
1205004	2	1954	4	2	4	2	3	2								-1	3	-1	3	-1	-1	3	-1	0	0	0	0	0	0	0	0	0	0	0	1
83301629868274492	2	1962	4	2	4	1	1	1	6	1	2	6	6	5	6	3	-1	3	3	2	2	2	1	0	0	0	0	0	0	0	0	0	0	0
6212003	2	2003	3	1	4	1	4	1	2	2	2	6	6	2	6	4	4	4	4	4	4	4	4	1	1	0	0	0	0	0	0	0	0	0	2
83871629873427891	1	1966	3	2	4	1	1	1	2	6	6	6	6	6	6	4	4	-1	3	3	3	3	2	0	0	0	0	0	0	0	0	0	0	0	1
6212012	1	1963	2	2	4	1	1	2								3	3	3	3	3	3	3	3	0	0	0	0	0	0	0	0	0	0	0	1
6212010	1	1959	3	2	1	1	1	2								4	4	4	4	4	4	4	4	0	0	0	0	0	0	0	0	0	0	0	1
83301629868331055	1	1971	2	2	4	1	1	1	6	1	3	6	6	3	6	4	3	3	3	2	-1	3	2	0	0	0	0	0	0	0	1	0	0	0	1
81211629886936497	2	2000	8	1	2	2	4	1	3	2	1	6	1	4	6	4	3	3	3	3	3	3	3	1	0	0	0	0	0	0	0	0	0	0	2
83921629770327980	2	1961	2	2	4	1	3	2								3	-1	3	-1	-1	-1	3	3	0	0	0	0	0	0	0	0	0	0	0	2
6212020	2	1991	2	2	4	1	1	2								3	3	3	3	3	3	3	3	0	0	0	0	0	0	0	0	0	0	0	2
77581629879750975	2	1986	3	3	4	1	1	1	3	1	1	1	6	3	6	2	2	2	3	2	3	3	2	0	0	0	0	0	0	0	0	0	0	0
83301629868368546	2	1967	2	2	4	1	1	2								2	-1	-1	2	2	2	2	2	0	0	0	0	0	0	0	0	0	0	0	2
83871629877659316	2	2002	7	1	4	1	4	1	5	2	2	6	3	3	6	4	4	4	3	3	2	4	4	0	0	0	0	0	0	0	0	0	0	0	2
6212001	2	1975	1	5	4	1	1	2								4	-1	4	4	4	4	4	4	0	0	0	0	0	0	0	0	0	0	0	2
6212004	2	1994	2	2	4	1	1	1	6	4	1	6	6	5	6	3	3	3	3	3	3	3	3	0	0	0	0	0	0	0	0	0	1	0	2
6115002	2	1978	3	2	4	1	1	2								3	2	2	3	3	2	-1	-1	0	0	0	0	0	0	0	0	0	0	0	2
6117001	1	2002	8	1	2	3	4	1	5	1	1	6	3	2	6	3	2	3	3	3	3	3	2	0	0	0	0	0	0	0	0	0	0	0	2
6212016	1	1964	2	2	4	1	3	2								4	4	4	4	4	4	4	4	0	0	0	0	0	0	0	0	0	0	0	1
83871629860426524	1	1979	3	2	4	1	1	1	3	1	6	6	1	5	6	1	1	3	3	3	4	1	1	0	0	0	0	0	0	0	0	0	0	0	2
83301629771261699	1	1962	3	2	4	1	1	2								3	2	1	3	2	2	3	2	0	0	0	0	0	0	0	0	0	0	0	2
6115015	1	1987	3	2	4	1	1	1	3	2	6	6	6	3	6	1	3	2	2	3	-1	1	1	1	0	0	0	0	0	0	0	0	0	0	3
6212013	2	1994	4	2	4	1	1	1	1	1	1	6	6	2	6	3	3	3	3	3	3	3	3	0	0	0	0	0	0	0	0	0	0	0	1
6212019	2	1988	1	2	4	1	1	1	6	6	1	6	6	6	6	3	3	3	3	3	3	3	3	0	0	0	0	0	0	0	0	0	0	0	2
6212006	1	1984	1	2	4	1	1	2								3	3	3	3	3	3	3	3	0	0	0	0	0	0	0	0	0	0	0	3
6212005	1	1961	1	2	4	1	3	2								3	3	3	3	3	3	3	3	0	0	0	0	0	0	0	0	0	0	0	2
83301629771428427	1	1966	3	2	4	1	1	2								3	3	3	3	2	2	3	3	0	0	0	0	0	0	0	0	0	0	0
83871629767034980	2	1957	1	2	4	1	1	2								-1	4	4	4	-1	-1	2	1	0	0	0	0	0	0	0	1	0	0	0	1
84011629800101784	1	1989	7	2	4	2	1	1	1	2	1	3	4	2	6	3	2	2	2	2	3	2	3	1	0	0	0	1	0	0	0	1	1	0	2
83281629772267422	1	2002	4	1	4	3	4	1	3	1	1	6	6	3	6	3	3	3	3	2	2	3	2	0	0	1	0	0	0	0	0	0	0	0	2
83921629801508176	1	1994	3	1	4	1	1	1	5	4	6	6	6	2	6	1	1	1	1	4	1	1	1	0	0	1	0	0	0	0	0	0	0	0	2
83951629773905978	2	1980	3	2	4	1	1	1	6	1	1	6	6	1	6	4	3	3	2	2	1	1	2	0	0	0	0	0	0	0	0	0	0	0	2
6212018	1	1964	1	2	4	1	1	2								3	3	3	3	3	3	3	3	0	0	0	0	0	0	0	0	0	0	0	1
6212009	2	2003	6	1	4	1	4	1	6	1	6	6	6	6	6	3	3	3	3	3	3	3	3	0	0	0	0	0	0	0	0	0	0	1	2
6212002	2	1995	3	2	4	1	3	1	1	1	1	6	6	4	6	3	3	3	3	3	3	3	3	0	0	0	0	0	0	0	0	0	0	0	1
83301629773602431	2	1994	7	2	4	1	1	1	1	1	1	4	6	2	6	4	4	4	3	4	3	2	3	0	0	0	1	0	0	0	0	1	0	0	2
83871629792439965	2	1977	3	2	4	1	1	1	6	6	1	6	5	4	6	3	3	3	3	2	-1	-1	-1	0	0	0	0	0	0	0	0	0	0	0	1
6212023	1	1953	1	5	4	1	1	2								3	3	3	3	3	3	3	3	0	0	0	0	0	0	0	0	0	0	0	2
6212021	2	1994	1	2	4	1	1	2								4	4	4	4	4	4	4	4	0	0	0	0	0	0	0	0	0	0	0	1
83921629789705550	2	1954	1	3	4	1	1	2								-1	-1	-1	-1	-1	-1	-1	-1	0	0	0	0	0	0	0	0	0	0	0	1
83281629619695181	2	1987	8	2	2	3	3	2								3	3	4	4	3	3	4	3	0	0	0	0	0	0	0	0	0	0	0	2
83931629775661962	2	1980	2	2	4	1	3	2								3	3	3	3	3	3	3	3	0	0	0	0	0	0	0	0	0	0	0	2
83951629773933634	1	2001	8	1	2	3	4	1	3	1	1	6	2	3	6	3	3	3	3	2	3	3	3	1	0	0	0	0	0	0	0	0	0	0	2
83291629692846270	1	1974	8	2	1	2	1	1	1	6	1	1	1	5	6	4	3	3	3	3	1	4	3	0	0	0	0	1	0	0	0	0	0	0	1
6202020	1	1980	9	4	4	3	1	1	1	5	5	6	5	4	6	3	3	3	3	3	3	3	3	1	0	0	0	0	0	0	0	0	0	0	2
83931629715696078	2	1964	3	5	4	1	3	2								-1	-1	-1	-1	2	-1	-1	-1	0	0	0	0	0	0	0	0	0	0	0	1
83281629686710204	2	1984	4	2	4	3	3	2								3	3	3	3	3	3	2	2	0	0	0	0	0	0	0	0	0	0	0	2
84021629710247465	2	2000	8	1	2	1	4	1	1	1	1	6	2	3	6	4	4	4	4	3	2	3	3	1	0	0	0	0	0	0	0	0	0	0	2
6210010	2	1981	3	2	4	1	3	1	3	1	1	6	4	5	6	4	4	4	4	2	2	2	2	0	0	0	0	0	0	0	0	0	0	0	1
83371629699339806	2	1995	7	2	4	1	3	1	5	3	2	6	3	5	6	3	3	1	2	3	3	2	2	0	0	0	0	0	0	0	0	0	0	1	2
83361629706816890	2	1963	3	2	4	1	3	2								4	4	4	3	-1	4	4	4	0	0	0	0	0	0	0	0	0	0	0	3
6210019	2	2002	4	1	2	1	4	1	2	2	1	6	2	4	6	3	3	3	3	2	2	3	3	1	0	0	0	0	0	0	0	0	0	0	2
83251629643748186	2	1981	1	2	4	3	3	2								3	-1	-1	4	-1	-1	-1	-1	0	0	0	0	0	1	0	1	0	0	0	1
83371629699415695	1	1973	2	4	4	1	1	1	1	6	6	6	6	6	6	-1	3	3	3	3	3	3	-1	0	0	0	0	0	0	0	0	0	0	0	1
6107018	1	1974	3	2	4	1	2	1	3	1	2	2	1	5	6	4	4	4	4	2	4	4	2	0	1	1	0	0	1	0	0	1	1	0	1
6115012	1	1961	3	2	4	1	3	2								3	3	3	1	3	2	2	2	0	0	0	0	0	0	0	0	0	0	0	1
6107023	1	1953	3	2	4	1	1	2								3	-1	-1	2	-1	2	3	1	0	0	0	0	0	0	0	0	0	0	0	2
6107020	1	1959	3	2	4	1	1	2								2	-1	-1	-1	-1	-1	-1	-1	0	0	0	0	0	0	0	0	0	0	0	1
6204005	1	1960	3	2	4	1	3	1	1	1	1	2	6	6	6	4	-1	3	3	3	4	1	1	0	0	0	0	0	0	0	0	0	0	0	1
6204024	2	1973	4	2	4	1	3	1	3	1	1	6	6	4	6	3	2	-1	2	2	3	3	3	0	0	0	0	0	0	0	0	0	0	0	1
6210023	2	1965	2	2	4	1	3	2								4	-1	-1	2	3	-1	4	2	0	0	0	0	0	0	0	0	0	0	0	1
6107013	2	1965	3	2	4	1	1	2								4	4	4	4	2	4	4	4	0	0	0	0	0	0	0	0	0	1	0	1
6107008	2	1981	7	2	4	1	2	1	1	1	1	3	4	3	6	3	2	3	3	3	2	3	2	0	0	0	0	0	0	0	0	0	0	0	2
6210021	2	1964	2	2	4	1	1	2								3	-1	-1	3	2	2	3	2	0	0	0	0	0	0	0	0	0	0	0	2
83951629629015005	1	1974	9	2	4	3	2	1	1	1	3	6	5	3	6	4	3	3	3	2	3	3	3	0	0	0	0	0	0	0	0	0	0	0	2
6210016	1	1968	3	2	4	1	3	2								2	2	2	2	2	2	2	2	0	0	0	0	0	0	0	0	0	0	0	2
6202008	2	1972	7	2	1	3	1	2								4	3	2	3	2	2	2	2	0	0	0	0	0	0	0	0	1	0	0	1
6210022	1	1959	4	2	4	1	3	2								4	3	1	2	2	2	2	-1	0	0	0	0	0	0	0	0	0	0	0	2
6210001	2	1966	1	2	4	1	1	2								3	2	2	2	2	2	2	1	0	0	0	0	0	0	0	0	0	0	0	2
6210012	2	1973	2	2	4	1	3	2								2	2	-1	2	2	2	2	2	0	0	0	0	0	0	0	0	0	0	0	3
84011629354984895	2	1992	3	2	4	1	3	1	5	4	5	4	1	3	6	4	3	3	3	2	2	3	2	0	0	1	0	0	0	0	1	0	0	0	2
6202014	1	1962	7	2	4	3	2	1	1	1	6	6	6	4	6	4	4	3	3	3	3	3	3	0	0	0	0	0	0	0	0	0	0	0
6118014	1	1987	2	2	4	1	1	1	3	2	1	6	6	4	6	3	3	3	3	2	2	3	3	0	0	0	0	0	0	0	0	0	0	0	1
6202018	1	1969	4	2	4	2	1	1	1	1	1	2	2	6	6	4	3	3	3	3	3	3	3	0	0	0	0	0	0	0	0	0	0	0	1
6210025	2	1973	4	2	1	1	1	1	1	2	1	6	6	6	6	2	2	-1	-1	2	2	2	2	0	0	0	0	0	0	0	1	0	0	0	2
83251629617477517	1	1970	2	2	1	1	1	1	2	1	2	2	2	3	6	3	3	2	2	2	2	2	2	0	0	0	0	0	1	0	1	1	0	0	1
6210007	1	1965	2	2	4	1	3	2								3	1	1	2	3	3	3	3	0	0	0	0	0	0	0	0	0	0	0	1
6210003	2	1990	3	2	4	1	1	1	3	1	1	6	6	4	6	3	3	3	3	3	3	3	3	0	0	0	0	0	0	0	0	0	0	0	2
6118015	1	1957	1	2	4	1	1	2								2	3	2	4	-1	3	4	2	0	0	0	0	0	0	0	0	0	0	0	1
6210005	1	1998	8	1	2	1	3	1	1	2	1	4	1	4	6	3	3	3	2	2	2	2	2	0	1	1	0	0	0	0	0	0	0	0	2
6210002	1	2002	4	1	4	1	4	1	3	2	2	2	1	2	6	3	3	3	3	2	2	2	2	0	0	0	0	0	0	0	0	0	0	0	1
6211010	2	1967	2	2	4	1	3	1	4	2	3	6	6	6	6	4	-1	-1	3	-1	-1	3	-1	0	0	0	0	0	0	0	0	0	0	0	1
83251629611709345	1	1970	3	2	4	1	3	1	1	3	6	6	2	3	6	4	4	4	4	4	4	4	4	0	0	0	0	0	0	0	1	1	0	0	1
6118016	1	1954	2	2	1	1	1	1	1	2	1	6	2	5	6	3	3	3	3	3	3	2	3	0	1	0	0	0	0	0	0	0	0	0	1
6211005	2	1987	3	2	4	1	1	1	3	1	1	6	6	2	6	3	2	2	3	3	3	3	1	0	0	0	0	0	0	0	0	0	0	0	2
6115024	2	1988	3	2	4	1	3	1	6	1	1	6	6	1	6	-1	-1	-1	3	3	-1	-1	-1	0	0	0	0	0	0	0	0	0	0	0	2
83291629598892478	1	1984	9	2	1	3	1	1	1	5	1	5	1	4	5	4	3	3	3	3	3	3	3	0	0	0	0	0	0	0	0	0	0	0	1
6118013	1	1967	1	2	4	3	3	2								-1	2	-1	-1	-1	2	3	2	0	0	0	0	0	0	0	0	0	0	0	1
6118017	1	1955	2	2	1	1	1	1	3	1	6	6	6	6	6	3	3	3	2	-1	2	3	1	0	0	0	0	0	0	0	0	0	0	0	1
83961629592544770	2	1970	2	2	4	1	3	2								4	3	3	3	3	3	3	3	0	0	0	0	0	0	0	0	0	0	0	2
6211020	1	2000	8	1	4	1	4	1	5	2	2	6	2	4	6	4	3	3	3	3	2	3	2	1	0	0	0	0	0	0	0	0	0	0	2
83961629592492106	2	1955	1	2	4	1	3	2								4	4	4	4	4	4	4	4	0	0	0	0	0	0	0	0	0	0	0	2
83961629592592700	2	1971	2	2	4	1	3	2								2	-1	-1	3	3	3	3	3	0	0	0	0	0	0	0	0	0	0	0	1
83901629554044843	2	1996	3	2	4	1	1	1	2	2	1	6	6	4	6	4	4	4	4	4	4	4	4	0	0	0	0	0	0	0	0	0	0	0	2
6211001	2	1978	3	2	4	1	1	1	2	1	6	6	6	5	6	2	2	2	2	2	2	2	2	0	0	0	0	0	0	0	0	0	0	0	1
84011629454575588	1	1975	6	3	4	1	1	1	1	4	6	6	6	4	6	3	3	3	2	2	1	1	1	0	0	0	0	0	0	0	0	0	0	0	2
83951629532895945	1	1971	7	2	1	3	1	1	1	1	2	6	6	4	6	4	3	3	3	3	2	3	3	0	0	0	0	0	0	0	0	0	0	0	2
6201006	2	1999	8	1	2	2	4	1	1	1	1	6	1	2	6	4	3	4	4	3	3	3	3	0	0	0	0	0	0	0	0	0	0	0	2
6211013	1	1953	2	2	4	1	3	2								-1	3	3	3	3	3	3	3	0	0	0	0	0	0	0	0	0	0	0	2
6118021	1	1960	4	2	1	1	1	1	1	4	4	6	1	3	6	3	3	3	3	2	2	3	3	1	0	1	0	0	1	0	1	1	0	0	1
6118006	1	1970	1	2	4	1	3	2								-1	3	4	3	3	-1	4	-1	0	0	0	0	1	0	1	1	1	0	0	1
6211025	1	1968	2	2	4	1	1	2								2	2	2	2	2	2	2	2	0	0	0	0	0	0	0	0	0	0	0	1
6211012	2	1996	1	5	4	1	3	2								-1	-1	-1	3	3	3	3	3	0	0	0	0	0	0	0	0	0	0	0	2
6211003	2	1961	4	3	4	1	3	1	1	1	1	6	6	2	6	4	3	3	3	3	3	3	3	0	0	0	0	0	0	0	0	0	0	0	1
83991629506476704	2	1983	2	2	4	1	1	2								3	3	3	3	3	3	3	3	0	0	0	0	0	0	0	0	0	0	0	2
6115010	2	1989	3	2	4	1	3	1	2	1	2	6	3	2	6	-1	-1	-1	-1	-1	-1	-1	-1	0	0	0	0	0	0	0	0	0	0	0	2
6211004	2	1953	1	5	4	1	1	2								4	-1	4	4	4	-1	4	2	0	0	0	0	0	0	0	0	0	0	0	2
6115006	2	1988	3	2	4	3	3	1	3	1	6	6	1	3	6	3	3	3	3	3	4	4	4	0	0	0	0	0	0	0	0	0	0	0	2
83951629517793947	1	1991	8	1	4	2	2	1	1	1	1	6	2	2	4	3	2	2	2	3	3	3	3	0	0	0	0	0	0	0	0	0	0	0	2
83281629343984708	2	1968	4	2	4	3	1	1	1	2	1	1	5	2	5	4	3	3	3	3	2	2	3	0	0	0	0	0	0	0	0	0	0	0	2
6115013	1	1959	3	2	4	1	2	2								4	4	4	4	4	3	3	3	0	0	0	0	0	0	0	0	0	0	0	1
6118022	1	1962	5	2	1	1	1	1	1	2	3	6	1	5	6	4	-1	-1	3	3	3	4	4	0	1	1	0	0	0	0	0	1	0	0	2
83991629506439843	2	1970	1	2	4	1	1	1	6	6	1	6	6	6	6	3	3	3	3	3	3	3	3	0	0	0	0	0	0	0	0	0	0	0	2
83981629456492388	1	1971	1	2	4	1	1	2								3	3	3	3	3	3	3	3	0	0	0	0	0	0	0	0	0	1	0	1
83281629428895389	2	1953	7	5	1	3	3	1	1	2	3	6	5	2	6	3	3	3	3	3	2	3	3	0	0	0	0	0	0	0	0	0	0	0	2
83281629343607533	2	1972	8	2	4	3	1	1	1	1	6	6	2	4	5	3	3	3	3	3	3	3	3	0	0	0	0	0	0	0	0	0	0	0	2
6118004	2	1974	2	2	4	1	3	2								3	3	3	3	3	3	3	3	0	0	0	0	0	0	0	1	0	0	0	1
6118023	2	1971	1	2	4	1	1	1	2	1	2	6	6	6	6	3	-1	3	3	-1	3	3	3	0	0	0	0	0	0	0	0	0	0	0	1
83991629365028390	1	1965	8	2	1	2	1	2								4	3	3	3	3	3	3	3	0	0	0	0	0	0	0	0	0	0	0	2
6118003	1	1972	2	1	4	1	3	2								-1	3	3	3	3	3	3	3	0	0	0	0	0	0	0	1	0	0	0	1
83991629364488656	2	1981	2	2	4	1	3	2								3	3	3	3	3	2	3	3	0	0	0	0	0	0	0	0	0	0	0	2
6118024	1	1960	2	1	1	1	1	2								2	3	3	4	4	3	4	4	0	0	0	0	0	1	0	0	0	0	0	1
84011629431899413	1	2001	7	1	4	2	4	1	1	1	1	6	1	1	6	4	4	4	4	4	4	4	3	0	0	0	0	0	0	0	0	0	0	0	2
83681629431187893	2	1975	3	2	4	2	1	1	3	3	3	6	6	6	6	4	4	4	2	3	2	2	2	0	0	0	0	0	0	0	0	0	0	0	3
83811629432021451	1	1955	4	2	4	1	1	2								3	-1	-1	2	3	2	2	2	0	0	0	0	0	0	0	0	0	0	0	1
83791629430885018	2	1967	2	2	4	1	1	1	2	3	1	6	6	6	6	-1	-1	3	-1	-1	2	-1	2	0	0	0	0	0	0	0	0	0	0	0	2
83991629364583301	2	1956	2	2	4	1	1	2								4	4	4	4	4	4	4	4	0	0	0	0	0	0	0	0	0	0	0	1
83291629343936678	2	1975	2	5	4	2	3	1	1	1	1	6	6	4	6	-1	1	1	1	1	1	1	1	0	0	0	0	0	0	0	0	0	0	0	1
83951629428385083	1	1955	4	2	4	3	3	1	1	1	1	6	6	1	6	3	3	-1	2	-1	3	3	2	0	0	0	0	0	0	0	0	0	0	0	2
4520013	1	1964	4	2	4	1	1	1	4	4	4	6	6	6	6	4	2	-1	3	2	2	2	1	0	0	0	0	0	0	0	0	0	0	0	1
83871629424753102	2	1965	3	2	4	1	1	1	1	2	1	1	2	1	1	3	3	3	3	3	3	3	3	0	0	0	0	0	0	0	0	0	0	0	1
83811629423778094	1	1968	2	2	4	1	1	2								-1	2	2	2	2	2	2	2	0	0	0	0	0	0	0	0	0	0	0	1
83301629422668969	2	1963	3	2	4	1	1	1	1	1	6	6	6	6	6	3	3	-1	2	3	-1	-1	2	0	0	0	0	0	0	0	0	0	0	0	2
83811629422617099	1	1983	2	2	4	1	1	1	2	3	3	6	6	4	6	4	3	3	3	3	2	3	3	0	0	0	0	0	0	0	0	0	0	0	2
83791629421120290	1	1968	3	2	4	1	1	1	1	1	2	6	6	6	6	3	4	4	3	2	2	2	2	0	0	0	0	0	0	0	0	0	0	0	1
4520019	2	1955	2	2	4	3	1	1	6	1	6	6	6	6	6	4	4	4	4	4	-1	4	2	1	0	0	0	0	0	0	0	0	0	0	1
83951629373822133	2	1975	5	2	4	3	1	2								3	3	2	3	3	3	3	3	0	0	0	0	0	0	0	0	0	0	0	2
6203001	2	1954	1	5	4	1	3	2								4	-1	-1	4	4	4	4	4	0	0	0	0	0	0	0	0	0	0	0	1
83291629343910145	2	1992	3	2	4	1	3	1	3	3	3	3	3	3	3	3	3	3	3	3	3	3	3	0	0	0	0	0	0	0	0	0	0	0	2
6201010	2	1984	8	2	4	3	1	1	2	2	2	6	2	2	6	3	3	3	3	3	3	3	3	0	0	0	0	0	0	0	0	0	0	0	2
4520010	2	1971	2	2	1	1	1	1	1	2	3	6	6	5	6	2	3	3	3	3	2	4	4	0	1	1	1	0	1	0	1	0	0	0	1
83871629362909587	1	1966	3	2	1	1	1	1	3	2	2	6	3	3	6	3	2	3	2	3	2	3	2	0	0	0	0	0	0	0	1	0	0	0	2
83301629358898918	1	1979	3	2	4	1	1	1	3	2	1	1	6	5	6	3	3	3	3	3	-1	2	2	0	0	0	0	0	0	0	0	0	0	0	1
6118001	1	1980	3	2	4	1	3	1	3	2	6	4	2	3	6	2	3	2	3	2	2	3	2	0	0	0	0	0	0	0	1	1	0	0	1
6118025	1	1953	2	1	4	1	1	2								-1	4	1	4	2	4	4	4	0	0	0	0	0	0	0	0	0	0	0	1
4520020	2	1984	3	2	4	1	1	1	5	1	1	6	6	4	6	3	3	3	3	3	-1	3	3	0	0	0	0	0	0	0	0	0	0	0	1
6203015	2	1963	1	2	4	1	1	2								2	3	3	3	3	3	3	3	0	0	0	0	0	0	0	0	0	0	0	2
6203025	2	1964	1	2	4	1	3	2								4	-1	3	3	3	3	3	3	0	0	0	0	0	0	0	0	0	0	0	2
83301629332157497	2	1983	2	2	4	3	3	1	6	1	3	6	6	2	6	4	4	4	4	3	3	3	3	0	0	0	0	0	0	0	0	0	0	0	1
83871629350874859	2	1952	1	2	4	1	3	2								3	2	3	3	1	2	1	1	0	0	0	0	0	0	0	0	0	0	0	1
83281629343656712	2	1962	4	2	4	3	3	2								3	3	3	3	3	-1	3	3	0	0	0	0	0	0	0	0	0	0	0	2
4520008	1	1958	3	2	4	1	1	2								4	4	4	1	4	1	1	3	0	0	0	0	0	0	0	0	0	0	1	1
4520025	1	1969	3	2	4	1	1	1	2	1	1	6	2	4	6	4	3	3	3	3	3	3	3	1	0	1	0	1	0	1	0	0	0	0	1
83691629341355001	2	1968	1	2	4	1	3	1	6	6	1	6	6	6	6	3	3	3	3	3	3	3	-1	0	0	0	0	0	0	0	0	0	0	0	2
6203014	2	1999	8	1	2	1	4	1	1	1	1	6	3	3	6	3	3	3	3	3	3	3	3	1	0	0	0	0	0	0	0	0	0	0	1
83981629339829786	2	1988	8	2	1	2	1	1	4	1	1	6	2	4	6	3	3	3	3	3	2	3	2	1	0	0	0	1	0	0	0	0	0	0	2
4520012	2	1973	3	2	4	1	1	1	6	1	4	6	6	4	6	3	3	3	3	3	3	3	3	0	0	0	0	0	0	0	0	0	0	0	2
4520003	2	1954	1	2	4	1	3	2								-1	-1	-1	3	2	-1	2	2	0	0	0	0	0	0	0	0	0	0	0	2
4520014	2	1953	2	2	4	1	1	2								2	-1	2	1	-1	1	2	2	0	0	0	0	0	0	0	0	0	0	0	2
4520024	2	1979	3	2	1	1	3	1	1	3	1	6	1	4	6	4	4	4	3	3	2	1	2	0	0	0	0	0	1	0	0	0	0	0	1
4520015	2	1966	3	2	4	1	1	1	6	2	2	6	6	6	6	2	3	3	4	2	3	3	4	0	0	0	0	0	0	0	0	0	0	0	1
83901629261374582	2	1997	8	1	4	1	2	1	1	2	1	2	2	3	6	3	2	3	2	2	3	2	2	0	0	0	0	0	0	0	0	0	0	0	2
4520006	1	1963	2	2	4	3	1	1	6	3	6	6	6	6	6	3	3	3	2	3	2	2	2	0	0	0	0	0	0	0	0	1	0	0	1
4513016	2	1979	8	2	1	2	1	1	1	1	2	1	1	4	6	3	3	3	3	3	2	2	3	0	0	0	0	0	0	0	0	0	0	0	1
6202021	1	1975	7	2	1	3	1	1	1	2	2	6	6	4	4	3	3	3	4	2	2	2	2	0	0	1	0	0	0	0	0	1	0	0	2
83841629284143673	2	1956	7	2	1	2	3	1	6	1	1	6	6	2	6	3	4	3	3	-1	3	2	2	0	0	0	0	0	0	0	0	0	0	0	2
84011629283417905	2	1994	8	1	4	1	1	1	1	1	1	1	4	1	6	3	3	3	3	3	3	3	3	0	0	0	0	0	0	0	0	0	0	0	2
6202022	1	1977	8	2	1	2	1	1	1	2	4	1	3	3	3	3	2	2	2	2	2	2	2	1	0	0	0	0	0	0	0	0	0	0	2
83921628936003748	1	1971	3	2	4	1	3	1	1	6	3	6	6	2	6	2	2	2	1	2	2	2	2	0	0	0	0	0	0	0	0	0	0	0	1
6203016	2	1988	6	1	4	1	3	1	2	6	6	6	6	6	6	3	3	3	3	3	3	3	3	0	0	0	0	0	0	0	0	0	0	0	2
6203024	2	1954	2	2	4	1	3	1	6	1	1	6	6	3	6	4	4	4	4	4	4	4	4	0	0	0	0	0	0	0	0	0	0	0	1
6203005	1	1965	3	2	4	1	3	2								-1	-1	4	-1	-1	-1	4	-1	0	0	0	0	0	0	0	0	0	0	0	1
6202017	2	1979	9	2	4	2	2	1	5	6	6	6	5	3	6	3	3	3	3	3	1	2	2	0	0	0	0	0	0	0	0	0	0	0	2
83871629276213721	2	1958	1	2	4	1	3	2								-1	-1	-1	-1	-1	-1	1	1	0	0	0	0	0	0	0	0	0	0	0	2
83921629174037445	1	1966	7	2	1	2	1	2								3	4	3	4	2	3	3	3	0	0	0	0	0	0	0	1	0	0	0	2
6203023	1	1961	3	2	4	1	1	2								4	3	3	3	3	3	3	3	0	0	0	0	0	0	0	0	0	0	0	1
6106001	1	1956	3	2	4	1	1	2								4	-1	-1	3	3	1	1	3	0	0	0	0	0	0	0	0	0	1	0	1
5135018	1	1991	4	1	4	1	1	1	1	1	2	3	2	3	6	3	3	3	3	3	2	3	2	1	0	0	0	0	0	0	1	0	0	0	1
5135009	1	1965	3	2	1	1	1	1	1	1	2	6	6	6	6	4	4	3	3	4	3	3	3	1	0	0	0	0	0	0	1	0	0	0	1
5135015	1	1984	5	2	4	1	1	1	3	1	2	5	2	2	5	3	4	3	3	2	4	4	1	1	0	0	0	0	1	0	0	1	0	0	1
83901629261792176	2	1994	8	1	4	3	1	1	3	1	1	1	5	2	1	4	3	3	3	2	2	2	2	1	0	0	0	0	0	0	0	0	0	0	1
6203008	1	1966	2	2	4	1	1	2								3	3	3	3	3	3	3	3	0	0	0	0	0	0	0	0	0	0	0	1
83821629172580528	2	1969	3	2	4	1	1	2								3	4	4	4	4	4	4	4	0	0	0	0	0	0	0	0	0	0	0	1
6106002	1	1957	3	2	4	1	3	2								3	3	3	1	3	1	1	1	0	0	0	0	0	0	0	0	1	0	0	1
6106009	1	1954	3	2	4	1	1	1	1	2	2	6	2	4	6	3	2	3	3	-1	2	2	2	0	0	0	0	0	0	0	0	0	0	0	1
5135006	2	1959	2	2	4	1	1	2								4	4	4	4	4	4	4	4	0	0	0	0	0	0	0	1	0	0	0	1
5135019	1	1963	3	2	4	1	1	1	5	2	1	6	6	6	6	3	2	2	3	3	2	2	2	0	0	1	0	0	0	0	0	0	0	0	2
83831629262329351	2	1981	8	2	1	2	1	1	1	1	1	6	1	3	6	4	-1	-1	3	3	2	2	-1	0	0	0	0	0	0	0	0	0	0	0	1
5135008	2	1953	3	2	4	1	1	2								3	3	3	1	3	-1	4	1	0	0	0	0	0	0	0	0	0	0	0	1
5135023	1	1958	2	3	4	1	1	1	1	2	6	6	6	6	6	3	3	3	3	3	3	3	3	0	0	0	0	0	0	0	1	0	0	0	1
6202004	2	1979	8	2	4	3	2	1	3	1	4	6	6	3	6	4	3	3	3	3	3	3	3	0	0	0	0	0	0	0	0	0	0	0	2
6203007	1	1967	2	2	4	1	3	1	1	2	2	6	6	6	6	4	4	4	2	3	3	3	3	0	0	0	0	0	0	0	0	0	0	0	2
5135012	1	2003	7	1	4	1	4	1	6	1	1	6	4	2	6	4	4	4	4	4	4	4	4	0	0	0	0	0	0	0	0	0	0	0	2
5135022	1	1965	2	2	4	1	1	2								3	3	2	2	2	2	-1	2	0	0	0	0	0	0	0	1	0	0	0	1
5135002	1	1959	3	2	4	1	1	2								4	4	4	3	3	3	3	3	0	0	0	0	0	0	0	1	0	0	0	1
5135003	2	1978	3	2	4	1	1	2								3	-1	-1	2	-1	3	-1	2	0	0	0	0	0	0	0	1	0	0	0	1
6203002	2	1982	2	2	4	1	3	1	6	2	1	6	6	4	6	4	3	4	3	-1	2	3	1	0	0	0	0	0	0	0	0	0	0	0	2
5135020	1	1965	2	2	4	1	3	2								3	3	3	3	3	3	3	3	0	0	0	0	0	0	0	0	0	0	0	2
5135013	1	1961	3	2	4	1	1	1	3	1	1	6	6	6	6	3	3	3	3	4	3	3	2	0	0	0	0	0	0	0	1	0	0	0	1
83871629252327220	2	1964	3	3	2	1	3	1	1	1	2	6	2	5	6	3	3	-1	2	2	3	2	2	0	0	0	0	0	0	0	0	0	0	0	1
5135001	2	1970	2	2	4	1	1	1	3	3	1	6	6	6	6	3	3	3	2	2	2	3	1	0	0	0	0	0	0	0	0	0	0	0	2
5135016	1	1976	3	2	4	1	1	2								3	3	3	3	3	3	3	3	0	0	0	0	0	0	0	1	1	0	0	1
6203018	2	1964	1	2	4	1	1	2								3	3	3	3	3	3	3	3	0	0	0	0	0	0	0	0	0	0	0	1
6119012	1	1966	3	2	4	1	3	1	1	3	2	3	6	2	6	3	3	2	3	2	3	3	3	1	0	0	0	0	0	0	0	0	0	0	2
84021629160293832	2	1964	1	2	4	1	3	2								4	-1	3	-1	-1	-1	3	-1	0	0	0	0	0	0	0	0	0	0	0	1
83371629160436257	2	1968	2	2	4	1	1	2								3	3	3	3	3	3	3	3	0	0	0	0	0	0	0	0	0	0	0	1
83841629205469307	2	2001	8	1	2	1	4	1	1	1	1	6	6	1	5	4	4	4	4	3	3	3	3	1	0	0	0	0	0	0	0	0	0	0	2
4513003	2	1981	7	2	1	2	1	1	1	1	1	1	1	4	6	3	3	3	3	3	3	3	3	0	0	0	0	0	0	0	0	1	0	0	1
83821629198392485	2	1977	3	2	4	1	1	1	1	1	1	6	4	3	6	4	4	3	3	2	2	3	1	0	0	0	0	0	0	0	0	0	0	0	2
83921629200181910	2	1983	2	2	4	3	3	1	6	2	1	6	2	6	6	-1	-1	-1	-1	-1	-1	-1	-1	0	0	0	0	0	0	0	0	0	0	0	2
6106007	2	1969	3	2	4	1	3	2								3	-1	3	3	2	-1	3	2	0	0	0	0	0	0	0	0	0	0	0	1
6201009	1	1976	8	2	4	3	2	1	1	1	1	2	2	2	6	3	3	3	3	3	3	3	3	0	0	0	0	0	0	0	1	0	0	0	2
83931629173697667	1	1963	3	2	4	3	1	1	2	1	6	6	6	3	6	-1	-1	-1	-1	-1	-1	-1	-1	0	0	0	0	0	0	0	0	0	0	0	2
83901629004607984	2	1986	1	2	4	1	3	2								4	3	2	3	2	2	2	2	0	0	0	0	0	0	0	0	0	0	0	2
83931629173611333	1	1999	7	1	2	1	4	1	1	1	1	6	6	4	6	4	4	4	4	4	4	4	2	0	0	0	0	0	0	0	0	0	0	0	2
83821629172555807	2	1999	7	1	2	1	2	1	1	1	1	6	3	2	6	4	3	4	3	3	2	4	3	1	0	0	0	0	0	0	0	0	0	0
83361629160489129	1	1955	3	2	4	1	3	2								3	3	3	3	3	3	3	3	0	0	0	0	0	0	0	0	0	0	0	1
83371629160395081	2	1971	2	2	4	1	1	2								3	3	3	3	3	3	3	-1	0	0	0	0	0	0	0	0	0	0	0	2
6104005	1	1992	4	1	4	1	1	1	1	1	1	6	6	2	6	3	3	3	3	3	3	3	3	0	0	0	0	0	0	0	0	0	0	0	2
83821629172517548	2	1976	3	2	4	1	1	1	2	1	1	6	6	5	6	4	2	3	3	4	4	4	3	0	0	1	0	0	0	0	0	0	0	0	2
6106021	1	1989	7	4	4	1	3	1	1	1	1	6	6	6	6	2	3	3	3	3	3	3	2	1	1	0	0	0	0	0	0	0	0	0	1
83791629180643464	2	2000	8	1	2	1	4	1	2	1	1	1	3	3	6	4	3	3	4	3	2	3	2	1	1	0	0	1	0	0	0	1	0	0	2
6106015	1	1960	3	2	4	1	1	1	1	1	1	6	1	6	6	4	4	4	4	4	4	4	4	0	0	0	0	0	0	0	0	0	0	0	1
6106017	2	1968	2	2	4	1	3	2								4	-1	-1	1	-1	-1	4	1	0	0	0	0	0	0	0	0	0	0	0	1
83831629164761572	1	1976	8	2	1	2	1	1	5	3	2	6	2	5	6	4	3	3	3	3	-1	3	2	0	0	0	0	0	0	0	0	0	0	0	2
83801629168905369	1	1976	2	2	4	1	1	1	3	2	1	6	6	3	6	4	4	4	4	3	-1	3	3	0	0	0	0	0	0	0	0	0	0	0	1
83791629168917137	1	1965	2	2	4	1	1	1	6	3	6	6	6	6	6	-1	1	-1	1	4	4	-1	1	0	0	0	0	0	0	0	0	0	0	0	2
6202016	1	1966	8	2	1	3	2	1	1	2	1	6	1	3	6	3	3	3	3	3	3	3	3	0	0	0	0	0	0	0	0	1	0	0	2
83811629167752605	1	1993	4	2	4	1	1	1	2	1	1	6	4	2	6	3	3	3	3	3	3	3	3	0	0	1	1	1	0	0	0	0	0	0	3
6106016	2	1967	3	2	4	1	3	1	1	1	3	6	6	5	6	4	-1	4	4	4	-1	4	-1	0	0	0	0	0	0	0	0	0	0	0	2
84021629160230815	1	1975	7	2	4	1	1	1	2	2	1	1	1	4	6	4	4	4	4	4	3	-1	2	0	0	0	0	0	0	0	0	0	0	0	1
6106004	1	1959	3	5	4	1	1	1	1	1	1	6	6	5	6	4	3	3	3	-1	3	3	1	0	0	0	0	0	0	0	0	0	0	0	1
83371629160328513	2	1967	1	2	4	1	1	2								3	3	3	2	3	3	3	2	0	0	0	0	0	0	0	0	0	0	0	2
83291629162774324	1	1964	3	2	4	3	3	1	1	5	1	6	6	6	6	3	3	2	3	3	3	3	2	1	1	0	0	0	0	0	0	0	0	0	1
83281629164494016	1	1971	2	4	4	1	3	2								-1	3	3	3	2	3	3	2	1	0	0	0	0	0	0	0	0	0	0	1
84021629160203255	2	1962	1	2	4	1	3	2								4	2	4	4	4	4	2	2	0	0	0	0	0	0	0	0	0	0	0	3
83371629160297849	1	1970	3	2	4	1	1	1	1	1	2	6	6	6	6	3	2	3	1	3	1	1	3	0	0	0	0	0	0	0	0	0	0	0	1
83361629160418854	1	1966	3	2	4	1	3	1	4	1	6	6	6	6	6	3	2	2	3	3	2	2	2	0	0	0	0	0	0	0	0	0	0	0	2
4513006	2	1958	1	2	4	1	3	2								3	3	-1	3	2	-1	1	1	0	0	0	0	0	0	0	0	0	0	0	2
83901629000723607	2	2000	8	1	1	3	4	1	1	1	1	6	4	5	6	4	4	4	4	3	3	3	3	1	0	0	0	0	0	0	0	0	0	0
4513015	1	1983	3	2	4	2	1	1	1	2	1	1	4	5	6	3	3	3	3	3	2	2	2	0	0	0	0	0	0	0	0	0	0	0	2
83721629087903639	2	1980	5	2	4	1	2	1	3	2	2	2	2	2	6	3	3	3	3	3	3	3	3	0	0	0	0	0	0	0	0	0	0	0	2
83921628828820508	2	1977	4	2	1	3	3	2								3	3	4	2	3	3	3	3	0	0	1	0	1	0	0	0	1	0	0	2
6104015	1	1976	3	2	4	1	1	1	1	6	1	1	6	3	6	3	3	-1	2	2	2	2	3	0	0	0	0	0	0	0	0	0	0	0	1
6119011	2	1968	2	2	4	3	1	1	3	5	6	1	3	1	6	3	-1	-1	3	4	2	4	-1	0	0	0	0	0	0	0	0	0	0	0	1
83711629105864431	2	1998	3	3	4	3	3	1	1	1	1	6	1	1	6	3	2	3	3	2	1	3	2	0	0	0	0	0	0	0	0	0	0	0	2
5136008	2	1976	2	2	4	1	2	1	5	6	1	6	6	4	6	3	3	3	3	3	3	3	3	0	0	0	0	0	0	0	1	0	0	0	1
5136015	2	1972	2	2	4	1	1	2								4	4	2	3	3	2	3	1	0	0	0	0	0	0	0	1	0	0	0	1
83701629100447178	2	1973	2	2	4	1	3	1	6	1	4	6	6	6	6	3	3	3	3	3	2	2	2	0	0	0	0	0	0	0	0	0	0	0	2
5136003	1	1969	3	2	4	1	1	1	2	6	5	6	6	3	6	4	3	3	3	3	3	3	3	0	0	0	0	0	0	0	1	0	0	0	1
83651629100329878	1	1985	4	2	4	1	1	1	3	1	1	6	3	5	6	3	3	3	3	3	3	3	3	1	0	0	0	0	0	0	0	0	0	1	2
5136022	2	1964	3	2	4	1	1	1	3	2	6	1	6	5	6	-1	4	-1	-1	4	4	4	-1	0	0	0	0	0	0	0	1	1	0	0	1
5136017	2	1966	2	3	4	1	1	1	3	1	3	6	6	6	6	3	3	3	3	3	3	3	3	0	0	0	0	0	0	0	1	0	0	0	1
83711629088721848	1	1985	3	2	4	1	1	1	2	5	4	6	6	5	6	4	2	3	3	2	2	1	3	0	0	0	0	0	0	0	0	0	0	0	2
5136009	1	1951	2	2	4	1	1	2								3	3	3	3	3	3	3	3	0	0	0	0	0	0	0	0	0	0	0
4513018	1	1974	8	4	1	2	1	1	1	6	1	1	1	5	6	3	3	3	2	3	2	3	2	1	0	1	0	0	0	0	1	0	0	0	1
83291629076228299	1	1962	4	2	4	1	1	1	1	1	1	6	6	3	6	3	3	-1	2	-1	-1	1	1	0	0	1	0	0	0	0	0	0	0	0	2
83651629097294519	1	1980	6	2	4	2	1	1	1	1	1	1	1	1	1	2	2	3	3	2	2	3	2	0	0	0	0	0	0	0	0	0	0	0	1
83281629078096516	1	1991	7	2	4	3	1	1	5	2	1	5	5	2	4	3	2	2	3	3	2	3	3	0	0	0	0	0	0	0	0	0	0	0	1
6205025	2	1986	3	2	4	3	3	1	1	1	1	6	6	3	5	3	3	3	3	1	3	3	3	0	0	0	0	0	0	0	0	0	0	0	2
83981629096664268	1	1990	7	2	4	2	1	1	5	2	1	6	6	5	6	3	3	3	3	3	3	3	3	0	0	0	0	0	0	0	0	0	0	0	3
83981629092187470	1	1973	2	2	4	1	3	2								3	3	1	3	3	3	3	3	0	0	0	0	0	0	0	0	0	0	0	3
83761629088976082	2	1987	8	1	4	3	1	1	1	2	3	1	2	3	4	3	3	3	3	3	3	3	3	0	0	0	0	0	0	0	0	0	0	0	1
83701629090173605	2	1963	5	2	4	2	3	1	1	3	1	6	6	6	6	3	3	3	3	3	3	3	3	0	0	0	0	0	0	0	0	0	0	0	1
4519007	2	1978	3	2	4	1	1	1	3	1	4	6	2	5	6	4	2	3	2	3	3	3	2	0	0	0	0	0	0	0	0	0	0	0	1
83971629086872012	1	1966	1	2	4	3	1	1	1	1	6	6	6	6	6	-1	4	4	4	4	4	4	-1	0	0	0	0	0	0	0	0	0	0	0	3
83981629087722140	2	1990	3	2	4	1	3	1	4	1	1	6	6	6	6	3	3	3	3	3	3	2	3	0	0	0	0	0	0	0	0	0	0	0	1
6201002	2	1981	8	2	1	2	1	1	3	2	1	6	1	4	6	4	4	4	4	4	3	4	4	0	0	0	0	0	0	0	0	0	0	0	2
83771629085591298	2	1968	3	3	4	1	1	2								3	3	3	2	3	2	3	3	0	0	0	0	0	0	0	0	0	0	0	2
5136016	2	1979	3	2	4	1	1	1	1	1	3	6	6	4	6	4	4	3	3	1	3	3	3	0	0	0	0	0	0	0	1	0	0	0	1
83291629076262399	2	2000	8	1	2	3	4	1	2	1	1	6	1	3	6	3	3	3	3	3	3	2	3	1	0	0	0	0	0	0	0	0	0	0	2
5136021	1	2003	6	1	4	1	4	1	3	1	2	6	5	3	6	4	3	3	3	3	3	3	3	1	0	0	0	0	0	0	0	0	0	0	3
4513004	1	1964	7	2	4	2	1	1	1	2	1	1	5	3	6	4	3	3	4	2	3	4	3	0	0	0	0	0	0	0	0	0	0	0	2
83971629083401107	2	1966	3	4	4	3	1	1	1	1	3	6	6	3	6	-1	3	-1	-1	2	1	-1	-1	0	0	0	0	0	0	0	0	0	0	0	2
83801629082268855	1	1953	3	2	1	1	1	2								3	3	3	3	3	3	3	2	0	0	1	0	0	0	0	1	1	0	0	1
83281629078021798	1	1957	1	2	4	3	3	2								3	1	1	3	3	-1	3	1	0	0	1	0	0	0	0	0	0	0	0	1
83681629080872864	1	1958	4	2	4	1	1	1	6	1	1	6	6	5	6	3	1	2	3	-1	3	2	2	0	0	0	0	0	0	0	0	0	0	0	1
5136002	2	1996	3	1	4	3	1	1	3	1	1	1	2	4	6	4	2	4	3	2	2	2	3	1	0	0	0	0	0	0	0	1	0	0	2
83791629081024628	2	1991	3	2	4	1	3	1	6	1	1	6	6	4	6	3	3	3	3	3	3	3	3	0	0	0	0	0	0	0	0	0	0	0	2
5136010	2	1973	2	2	4	1	1	2								3	1	1	3	2	3	-1	-1	0	0	0	0	0	0	0	1	0	0	0	1
83281629077986175	1	1992	7	2	4	1	1	1	2	2	2	6	4	3	6	3	2	2	3	2	2	3	3	1	0	0	0	0	0	0	0	0	0	0	1
83291629076468457	2	1970	3	2	4	1	3	1	4	1	6	6	6	2	6	3	2	-1	2	2	2	2	2	0	0	1	0	0	0	1	0	0	0	0	1
5136001	1	1975	2	2	4	1	1	2								4	2	3	1	1	1	1	1	0	0	0	0	0	0	0	1	0	0	0	1
4513025	2	1982	3	5	4	1	1	1	1	1	1	6	2	3	6	3	3	3	2	3	2	3	2	0	0	0	0	0	0	0	0	0	0	0	2
83931628935922651	1	1986	8	2	4	2	1	1	1	1	6	6	6	6	6	3	3	3	3	3	3	3	3	0	0	0	0	0	0	0	0	0	0	0	2
83361629074536488	2	1968	1	2	4	1	3	2								-1	3	3	3	1	1	3	1	0	0	0	0	0	0	0	0	0	0	0	1
5136019	1	2003	6	1	2	1	4	1	4	1	4	6	5	5	6	3	4	4	4	2	4	4	3	0	0	0	0	0	0	0	0	0	0	0	1
4510004	1	1966	2	2	4	1	1	1	6	3	3	6	6	5	6	3	3	3	3	3	3	3	3	0	0	0	0	0	0	0	0	0	0	0	1
4513012	1	1983	8	2	4	2	2	1	1	2	1	6	5	4	6	3	3	3	3	3	2	2	2	0	0	0	0	0	0	0	0	1	0	0	2
83371628991414523	2	1971	1	3	4	1	1	2								3	3	3	3	3	3	3	3	0	0	0	0	0	0	0	0	0	0	0	1
84021628991369218	1	1964	3	2	4	1	3	2								4	4	4	2	2	2	2	1	0	0	0	0	0	0	0	0	0	0	0	3
5136018	2	1973	2	2	4	1	1	1	6	6	1	6	6	5	6	3	3	-1	3	3	4	3	-1	0	0	0	0	0	0	0	1	0	0	0	1
5136023	2	1972	2	2	4	1	1	2								2	3	3	3	3	2	3	1	0	0	0	0	0	0	0	1	0	0	0	1
84011629025739890	1	1999	8	1	2	1	4	1	3	2	3	3	3	4	6	4	4	4	4	3	3	3	3	1	0	0	0	0	0	0	0	1	0	0	2
6104024	1	1957	2	2	4	1	3	2								4	-1	-1	3	2	1	-1	1	0	0	0	0	0	0	0	0	0	0	0	1
5136012	1	1967	3	2	4	1	3	2								3	3	3	3	3	3	3	2	0	0	0	0	0	0	0	0	0	0	0	2
6119010	1	1969	3	2	4	1	3	1	1	1	6	6	6	4	6	-1	-1	-1	3	2	-1	-1	-1	0	0	0	0	0	0	1	0	0	0	1	2
5136013	2	1966	2	2	4	1	1	1	6	5	3	6	6	4	6	2	3	2	2	2	4	-1	1	0	0	0	0	0	0	0	1	0	0	0	1
83721629005864272	2	1980	5	2	4	1	1	1	1	3	1	6	1	3	6	3	3	3	3	3	3	3	3	0	0	0	0	0	0	0	0	0	0	0	2
5136004	2	1964	2	3	4	1	1	1	5	1	1	6	6	4	6	3	3	3	3	3	2	3	2	0	0	0	0	0	0	0	1	0	0	0	1
83651629006088705	1	1970	7	2	4	2	1	1	1	1	1	6	1	5	6	3	3	3	3	3	3	3	2	0	0	0	0	0	0	0	1	0	0	0	2
6119009	2	1983	2	2	4	4	3	2								-1	4	3	3	3	3	1	2	0	0	0	0	0	0	0	1	0	0	0	1
83921628828767590	1	1995	8	1	2	3	1	1	1	1	1	1	1	1	6	4	4	4	4	4	4	4	4	0	0	0	0	0	0	0	0	0	0	0	3
83371628991443856	2	1991	3	2	4	1	3	1	5	1	1	6	6	4	6	3	3	2	3	3	3	3	2	0	0	0	0	0	0	0	0	0	0	0	2
84021628991341755	2	1962	2	2	4	1	3	2								-1	-1	-1	-1	-1	-1	-1	-1	0	0	0	0	0	0	0	0	0	1	0	1
6201019	2	1969	8	2	4	3	1	1	1	3	1	6	5	2	6	4	3	3	3	2	2	3	2	0	0	0	1	0	0	0	0	0	0	0	1
6119017	1	2001	8	1	4	1	4	1	3	6	2	6	2	4	6	2	3	3	3	2	2	3	3	1	0	0	0	0	0	0	0	0	0	0	1
6119008	1	1977	4	2	4	1	1	1	1	3	5	1	3	2	6	3	3	2	2	2	2	2	2	0	0	1	0	0	0	0	1	0	0	0	1
83701629005798063	1	1969	7	2	4	2	1	1	1	1	1	1	6	2	6	3	3	3	3	3	3	3	3	0	0	0	0	0	0	0	0	0	0	0	2
83931628828396952	2	1989	2	2	4	1	3	1	6	3	6	6	6	2	6	3	3	3	3	2	3	3	3	0	0	0	0	0	0	0	0	0	0	0	2
83861629017040447	2	1967	3	2	4	1	3	1	4	1	1	6	3	6	6	4	2	-1	-1	2	1	3	1	0	0	0	0	0	0	0	0	0	0	0	2
83671629015902594	1	1963	2	4	4	1	3	1	1	1	1	6	6	5	6	3	3	3	3	2	1	1	1	0	0	0	0	0	0	0	0	0	0	0	3
83861629011471411	2	1967	2	2	4	1	3	2								-1	-1	-1	-1	-1	-1	4	-1	0	0	0	0	0	0	0	0	0	0	0	2
6119006	2	1983	2	2	4	3	3	2								-1	-1	-1	2	3	2	-1	3	0	0	0	0	0	0	0	1	0	0	0	1
6119018	2	1987	2	2	4	1	3	1	1	1	5	6	3	4	6	2	-1	-1	3	3	3	3	2	1	0	1	0	0	0	1	0	0	0	0	2
4510020	2	1966	2	2	4	1	1	1	6	2	2	6	6	6	6	3	4	4	4	2	4	3	2	0	0	0	0	0	0	0	0	0	0	0	1
63311629009204798	1	1952	1	5	4	1	1	2								4	3	4	4	4	4	4	4	0	0	0	0	0	0	0	1	1	0	0	1
83761629009546952	2	1980	2	2	4	1	1	2								4	4	4	4	2	1	4	1	0	0	0	0	0	0	0	1	0	0	0	2
83701629005347684	1	1981	5	2	4	2	1	1	6	1	2	6	2	6	6	3	1	3	2	1	1	1	1	0	0	0	0	0	0	0	0	0	0	0	3
83971629007960029	2	2001	8	1	4	1	4	1	2	2	2	6	2	2	6	4	4	3	3	3	3	3	3	1	0	0	0	0	0	0	0	0	0	0	2
6119005	1	1958	2	2	4	1	3	1	2	6	6	6	6	6	6	-1	4	1	4	4	1	1	4	0	0	0	0	0	0	0	1	0	0	0	1
63321629005229830	2	1995	3	2	4	1	1	1	1	1	1	6	6	3	6	3	3	3	4	3	4	3	3	0	0	0	0	0	0	0	0	0	0	0	3
83901629004431849	2	1988	7	4	4	2	1	1	6	1	1	1	6	2	6	4	2	2	2	2	2	2	2	0	0	0	0	0	0	0	0	0	0	0	1
4519020	1	1979	3	2	4	1	3	1	1	1	3	6	6	4	6	3	3	3	3	3	3	3	3	0	0	0	0	0	0	0	0	0	0	0	2
4510002	2	1987	4	2	4	1	1	1	2	2	1	4	4	2	6	4	4	4	4	4	4	4	4	0	0	0	0	0	0	0	0	0	0	0	2
83861629000137750	1	1964	7	2	4	1	2	1	2	1	1	2	1	6	6	4	4	4	4	3	3	3	3	0	0	0	0	0	0	0	0	0	0	0	1
6201021	1	1953	3	2	1	3	3	1	2	1	3	6	6	5	6	3	3	3	3	3	3	3	3	0	0	0	0	0	0	0	0	0	0	0	2
63311629001502038	1	1967	2	3	4	1	1	1	1	1	1	6	6	4	6	4	2	3	3	3	3	3	1	0	0	0	0	0	0	0	1	0	0	0	2
84011628934714427	2	1987	4	2	4	1	3	1	1	1	1	2	1	1	2	3	3	3	3	3	2	1	1	0	0	0	0	0	0	0	0	0	0	0	2
83671629000653864	2	1986	3	2	4	1	3	1	5	1	1	6	6	6	6	4	1	1	1	1	1	1	1	0	0	0	0	0	0	0	0	0	0	0	3
6205001	1	1993	5	2	4	3	1	1	2	1	1	6	6	5	6	3	3	3	3	2	2	2	2	1	0	0	0	0	0	0	0	0	0	0	2
4519005	2	1970	2	2	4	1	1	1	6	5	4	6	6	6	6	-1	-1	4	3	3	3	2	2	0	0	0	0	0	0	0	0	0	0	0	2
6119004	1	1994	5	2	4	1	2	1	2	1	1	2	3	2	6	4	3	3	3	3	3	3	3	0	0	0	0	0	0	0	0	0	0	0	1
4505015	1	1965	8	2	1	2	1	1	1	1	1	6	1	4	6	4	4	4	4	3	3	3	3	1	0	0	0	0	0	0	0	0	0	0	3
4510023	1	2002	4	1	4	3	4	1	3	6	2	6	2	3	6	3	3	3	3	3	3	3	3	0	0	0	0	0	0	0	1	1	0	0	1
4505011	1	1975	8	2	1	3	1	1	2	5	1	6	3	4	6	4	4	4	3	3	2	3	2	0	0	0	0	0	0	0	0	0	0	0	1
6119003	2	1999	8	1	2	1	4	1	1	1	1	1	1	1	5	4	4	4	4	4	4	4	4	1	0	0	0	0	0	0	0	0	0	0	2
4510021	1	1996	3	1	4	3	3	1	2	1	1	6	6	3	6	3	3	3	3	3	3	2	2	0	0	0	0	0	0	0	1	1	0	0	1
4510024	2	1984	2	3	4	1	1	1	1	1	1	6	6	6	6	3	3	4	4	2	2	3	2	0	0	0	0	0	0	0	0	0	0	0	1
83361628991585806	1	1968	2	2	4	1	3	2								4	-1	4	3	3	3	2	2	0	0	0	0	0	0	0	0	0	0	0	1
4510008	1	1976	1	5	4	1	1	2								-1	4	-1	3	-1	-1	3	-1	0	0	0	0	0	0	0	0	0	0	0	2
6119019	2	1961	1	2	4	1	3	1	6	3	5	6	6	6	6	4	-1	-1	-1	-1	-1	4	-1	0	0	0	0	0	0	0	0	0	0	0	1
4510025	2	1977	2	2	4	1	2	1	6	1	1	6	6	6	6	4	4	4	4	4	4	4	4	0	0	0	0	0	0	0	0	0	0	0	1
6104011	2	1990	8	2	4	1	1	1	2	2	2	6	2	3	6	3	2	3	3	3	3	2	2	0	0	0	0	0	0	0	0	0	0	0	2
4519025	1	1971	3	2	4	1	3	1	3	1	3	6	6	4	6	4	3	3	3	4	3	4	1	0	0	0	0	0	0	0	1	0	0	0	2
84021628991282804	1	1953	3	2	4	1	3	2								4	3	3	2	2	2	1	1	0	0	0	0	0	0	0	0	0	0	0	1
5128010	1	1969	2	2	4	1	1	2								3	3	3	3	3	3	3	3	0	0	0	0	0	0	0	1	0	0	0	1
83371628991355709	1	1962	3	2	1	1	1	2								3	2	1	2	2	-1	2	1	0	0	0	0	0	0	0	0	0	0	0	2
5128012	2	1953	1	2	4	1	1	2								3	3	3	3	3	3	3	3	0	0	0	0	0	0	0	0	0	0	0	2
4519023	1	1997	3	1	4	3	3	1	1	1	2	6	6	6	6	3	1	3	3	3	4	2	3	1	0	1	0	1	0	1	1	1	0	0	2
5128022	2	1952	1	2	1	1	1	2								3	3	3	4	4	3	4	3	1	0	0	0	0	0	0	1	0	0	0	1
4519006	2	1985	3	2	4	1	2	1	4	5	1	6	2	5	6	3	3	3	-1	3	3	2	3	0	0	0	0	0	0	0	0	0	0	0	2
4519018	1	1963	3	2	4	1	1	1	1	5	1	6	1	6	6	3	3	2	3	3	3	3	3	0	0	1	0	0	0	1	1	0	0	1	1
5128020	1	1956	2	2	1	1	1	2								4	4	4	4	4	3	4	1	0	0	0	0	0	0	0	1	0	0	0	1
6205006	2	1981	8	2	4	3	1	1	1	1	1	6	6	4	6	4	4	4	4	4	4	2	3	0	0	0	0	0	0	0	0	0	0	0	2
4505013	2	1976	5	2	4	2	3	1	5	1	1	6	6	4	6	4	4	4	3	3	3	3	3	0	0	0	0	0	0	0	0	0	0	0	1
84011628934680381	1	1983	5	3	2	1	1	1	5	2	5	2	3	4	6	3	3	3	3	3	3	3	3	0	0	0	0	0	0	0	0	0	0	0	2
4505008	2	1999	8	1	2	1	1	1	1	6	1	6	1	1	6	4	4	4	4	4	4	4	4	0	0	0	0	0	0	0	0	0	0	0	1
6205012	2	1967	1	2	4	2	3	2								-1	2	1	3	2	2	-1	3	0	0	0	0	0	0	0	0	0	0	0	1
6205020	2	1974	8	2	1	3	1	1	3	2	1	6	2	3	6	4	4	4	4	4	4	4	4	0	0	0	0	0	0	0	0	1	0	0
5128019	2	1955	1	2	4	1	1	2								3	3	3	4	4	4	3	3	0	0	0	0	0	0	0	1	1	0	0	1
6205011	2	1974	2	2	4	1	1	1	6	6	1	6	6	6	6	3	3	3	3	2	3	3	3	0	0	0	0	0	0	0	0	0	0	0	1
5128005	1	2002	4	1	4	2	4	1	4	1	1	6	3	3	6	4	4	4	4	4	4	4	4	0	0	0	0	0	0	0	0	0	0	0	2
83901628691159522	1	1994	4	1	4	1	1	1	2	6	2	2	6	6	6	3	3	3	2	2	2	3	2	0	0	0	0	0	0	0	0	0	0	0	2
6119001	1	1966	4	2	4	1	3	2								4	3	4	3	3	2	2	1	0	0	1	1	0	0	0	0	0	0	0	1
5128007	2	1973	1	2	4	1	1	1	1	4	1	6	6	6	6	1	4	2	4	4	4	4	4	0	0	0	0	0	0	0	1	0	0	0	1
84011628934808231	2	1956	1	2	4	1	1	2								4	1	-1	4	4	-1	1	-1	0	0	0	0	0	0	0	0	0	0	0
5128008	1	1990	3	2	4	3	1	1	3	6	1	6	6	4	6	3	3	3	3	3	3	3	3	0	0	0	0	0	0	0	0	0	0	0	1
63221628933969731	2	1994	8	2	2	2	1	1	3	1	1	6	2	2	4	4	3	3	3	2	3	3	3	0	0	1	0	0	0	0	0	0	0	0	2
5128013	1	1987	2	1	4	1	1	1	3	1	1	6	6	4	6	3	3	3	3	3	3	2	2	0	0	0	0	0	0	0	0	0	0	0	2
3724015	2	1966	9	2	3	2	1	1	1	1	1	1	6	2	6	2	3	3	2	2	2	3	2	0	0	0	1	0	0	0	0	0	0	1	2
4505019	2	1974	8	2	4	2	1	1	1	1	1	1	1	2	4	3	3	3	3	3	3	3	3	1	0	0	0	0	0	0	0	0	0	0	1
5128011	2	1965	2	2	4	1	1	1	6	1	1	6	6	6	6	4	4	4	4	4	4	4	4	0	0	0	0	0	1	0	1	0	0	0	1
5128024	1	1964	2	2	4	1	1	1	4	5	1	6	4	6	6	4	3	3	3	3	3	3	3	0	0	0	0	0	0	0	1	1	0	0	1
5128025	2	1961	2	2	4	1	1	2								3	3	3	3	3	2	3	2	0	0	0	0	0	0	0	1	0	0	0	1
5128023	2	1971	2	2	4	1	1	1	5	2	1	6	6	5	6	3	3	3	4	3	3	4	3	0	0	0	0	0	0	0	0	0	0	0	2
4510001	2	1993	3	2	4	3	3	1	6	2	2	6	2	4	6	3	3	3	3	3	3	2	2	0	0	0	0	0	0	0	0	0	0	0	3
83931628828352904	2	1976	4	3	4	3	3	1	1	3	6	6	6	5	6	4	4	4	4	4	3	4	4	0	0	0	0	0	0	0	0	0	0	0	2
6104017	2	1953	1	5	4	1	3	2								4	2	4	2	-1	2	3	2	0	0	0	0	0	0	0	0	0	0	0	1
85481628922965382	2	1981	8	2	4	2	1	1	1	1	1	5	5	3	5	2	2	-1	3	3	3	1	2	0	0	0	0	0	0	0	0	0	0	0	2
63301628918756471	2	1999	8	1	2	2	2	1	1	1	1	6	2	4	6	3	3	3	3	2	2	3	2	1	0	0	0	0	0	0	0	0	0	1	1
6104003	2	1957	3	5	4	1	3	2								3	3	3	3	-1	-1	3	1	0	0	0	0	0	0	0	0	0	0	0	1
85501628923086055	2	1996	9	1	2	2	4	1	1	1	1	1	1	2	3	3	3	3	3	3	3	3	3	1	0	0	0	0	0	0	0	0	0	0	2
85471628921768199	2	1997	9	1	2	2	4	1	1	1	1	2	1	5	6	3	3	3	3	3	3	2	2	1	0	0	0	1	0	0	0	1	0	0	3
4510007	1	1963	3	4	4	1	3	2								4	2	4	4	3	2	4	4	0	0	0	0	0	0	0	0	0	0	0	2
4505010	2	1970	5	2	4	2	3	2								3	3	2	3	1	1	1	1	0	0	0	0	0	0	0	0	0	0	0	2
4510015	1	1958	3	5	4	1	1	2								-1	3	-1	3	-1	-1	3	3	0	0	1	0	0	0	0	0	0	0	0	1
3720018	1	1957	2	2	4	2	3	2								3	4	3	3	3	3	3	3	0	0	0	1	0	0	0	0	0	0	0	1
3720019	2	1987	4	2	4	2	1	1	2	3	3	1	1	4	5	2	3	3	3	3	3	4	4	0	0	0	0	0	0	0	0	0	0	0	2
5134015	1	1985	8	2	4	3	2	1	1	2	5	2	2	3	6	4	4	4	3	4	3	4	3	0	0	0	0	0	0	0	0	1	0	0	3
3720015	2	1991	7	1	1	2	1	1	4	1	1	1	2	3	6	3	3	3	3	3	3	3	3	0	0	0	0	0	0	0	1	1	0	0	1
3720010	1	1958	3	2	4	2	3	2								3	4	4	3	-1	-1	2	-1	1	0	0	0	0	0	0	0	0	0	0	2
4510011	1	1982	3	2	4	3	1	1	5	6	3	2	6	5	6	3	3	3	3	-1	-1	-1	-1	1	1	0	0	0	0	0	0	0	0	0	2
6204017	1	2001	8	1	2	1	4	1	2	1	1	6	1	3	4	4	3	4	3	3	2	3	3	1	1	0	0	0	0	0	0	1	0	0	2
4510016	2	1968	1	2	4	3	1	1	1	1	6	6	6	4	6	3	3	3	-1	2	2	2	-1	0	0	0	0	0	0	0	0	0	0	0	2
83981628922800988	1	1971	1	2	4	1	1	2								3	3	3	3	3	3	3	3	0	0	0	0	0	0	0	0	0	1	0	1
3724009	1	1979	7	2	2	2	2	1	1	6	2	1	3	3	6	4	2	2	2	2	4	4	2	1	0	0	0	0	0	0	0	0	0	0	2
83261628920484811	1	1958	3	2	4	1	3	1	1	5	1	5	5	5	5	3	3	3	3	3	3	1	3	0	0	0	0	0	0	0	0	0	0	0	2
83971628920086463	1	1964	3	2	4	1	1	2								-1	4	4	4	3	3	-1	2	0	0	0	0	0	0	0	0	0	0	0	1
4519004	1	1969	2	2	4	1	1	2								2	1	2	2	2	-1	1	3	0	0	0	0	0	0	0	0	0	0	0	1
4519013	1	1993	3	2	4	3	3	1	1	3	4	6	6	5	6	3	3	4	2	3	3	3	3	1	0	0	0	0	0	0	0	0	0	0	3
63211628918179107	1	1986	3	2	4	1	3	1	2	3	6	6	6	5	6	3	3	3	3	3	3	3	-1	1	0	0	0	0	0	0	0	1	0	0	3
6204016	2	1970	3	2	4	1	3	1	6	1	1	6	6	6	6	4	3	3	3	3	2	2	1	0	0	0	0	0	0	0	0	0	0	0	1
6208003	1	1954	2	2	1	1	3	2								2	3	3	3	1	3	3	3	0	0	0	0	0	0	0	0	0	0	0	2
6119020	2	1964	2	2	4	1	1	1	5	2	3	6	5	6	6	4	3	4	3	2	1	1	1	0	0	0	0	0	0	0	0	0	0	0	2
85471628913827757	2	1980	9	2	1	2	1	1	1	5	2	1	1	4	6	4	4	3	3	3	2	3	3	0	0	0	1	0	1	0	0	0	0	0	1
85501628913067825	1	1982	9	2	1	2	1	1	1	3	1	1	1	4	6	3	3	3	3	3	3	3	2	0	1	0	1	0	0	0	0	0	0	0	2
6205024	2	1967	1	2	4	1	3	1	5	4	4	6	6	6	6	2	-1	3	2	-1	-1	2	-1	0	0	0	0	0	0	0	0	0	0	0	2
3724008	1	1972	9	2	1	2	1	1	1	5	1	1	2	4	5	4	1	3	2	3	2	2	1	1	0	0	1	0	0	0	1	0	0	0	2
6104007	2	1989	5	2	4	1	2	1	4	4	2	6	2	3	6	1	2	1	2	1	1	2	2	0	0	0	0	0	0	0	0	0	0	0	1
83921628828999410	2	1981	3	2	4	1	3	2								4	3	2	3	3	3	3	3	0	0	0	0	0	0	0	0	0	0	0	1
6205002	1	2002	4	1	4	1	4	1	2	2	1	6	2	3	6	3	2	4	3	3	2	2	3	0	0	0	0	0	0	0	0	0	0	0	2
63211628910431390	1	1971	7	2	4	2	3	1	1	4	1	6	3	3	5	3	3	3	3	3	3	3	3	0	0	0	0	0	0	0	0	0	0	0	3
6119021	1	1957	1	1	4	1	1	2								4	4	4	4	1	3	1	1	0	0	0	0	0	0	0	0	0	0	0	3
3724019	2	1963	4	2	4	2	3	1	1	1	1	6	6	6	6	2	3	3	3	3	3	3	3	0	0	0	0	0	0	0	0	0	0	0	2
3724023	1	1952	4	5	1	1	3	2								3	2	2	2	2	2	2	2	0	0	0	0	0	0	0	0	0	0	0	2
3720005	1	1971	7	2	1	2	1	1	1	1	3	1	4	1	6	4	3	2	2	3	1	3	3	0	0	0	0	0	0	0	0	0	0	0	1
3724005	2	1979	9	2	3	2	1	1	1	1	6	1	1	4	6	4	4	4	3	3	3	3	3	0	0	0	0	0	0	0	0	0	0	0	2
5134025	1	1963	2	2	4	2	1	1	2	2	2	6	6	5	6	4	4	4	4	4	3	3	4	0	0	0	0	0	0	0	1	0	0	0	1
3724017	2	1980	9	2	1	2	1	1	1	1	1	2	2	1	5	2	2	2	3	3	2	3	3	0	0	0	0	0	0	0	0	0	0	0	2
3724002	2	1978	7	2	4	2	1	1	1	2	6	1	1	2	5	1	3	3	3	3	3	3	3	0	0	0	0	0	0	0	0	0	0	0	2
3726022	2	1968	3	2	4	3	1	1	3	1	1	1	3	3	6	3	3	3	3	3	3	3	3	0	0	0	0	0	0	0	0	0	0	0	3
6104021	1	1981	3	2	4	1	3	1	1	3	2	6	6	3	6	3	2	-1	3	3	2	2	-1	0	0	0	0	0	0	0	0	0	0	0	1
3720013	2	1970	5	4	1	2	1	1	1	1	2	1	1	4	6	2	4	3	2	3	3	2	2	0	1	1	1	0	0	0	1	1	0	0	1
6104020	2	1988	3	2	4	1	1	1	1	1	1	6	3	3	6	3	3	3	3	3	3	3	3	0	0	0	0	0	0	0	0	0	0	0	1
3720001	2	1984	8	2	1	2	1	1	1	1	2	1	4	2	5	2	3	3	3	2	2	3	3	0	0	0	0	0	0	0	0	0	0	0	1
3720009	2	1957	1	2	4	1	3	2								-1	-1	3	3	2	2	2	-1	0	0	0	0	0	0	0	0	0	0	0
6108020	1	1976	7	2	4	1	1	1	2	2	3	1	2	2	4	3	3	3	3	3	2	2	2	0	0	0	0	0	0	0	0	1	0	1	2
6119022	1	1973	1	1	4	1	1	2								4	4	-1	3	-1	2	4	-1	0	0	0	0	0	0	0	0	0	0	0	1
3726004	2	1969	3	2	4	2	1	2								4	-1	4	4	4	4	4	4	0	0	0	0	0	0	0	0	0	0	0	2
3726012	1	1966	7	2	1	2	1	1	1	1	1	6	1	5	6	4	4	3	3	4	3	4	3	0	0	0	0	0	0	0	0	0	0	0	3
3720007	1	1996	7	1	4	2	3	1	1	1	1	2	6	4	6	3	3	3	3	3	2	3	3	0	0	0	0	0	0	0	0	0	0	0	2
3726001	1	1965	5	2	1	3	1	1	1	6	6	2	4	6	6	3	3	3	3	3	3	3	3	0	0	0	0	0	0	0	0	1	0	0	1
3726020	1	1955	5	2	1	2	3	2								3	3	3	4	3	3	3	-1	0	0	0	0	0	0	0	0	0	0	0	2
3720004	1	1953	3	2	1	3	3	1	1	6	6	6	1	6	6	4	3	3	2	3	2	2	2	0	0	0	0	0	0	0	0	1	0	1	1
5134010	2	1971	3	2	4	1	1	1	1	1	1	6	6	3	6	1	2	2	2	2	2	2	2	0	0	0	0	0	0	0	0	1	1	0	3
3723020	1	1953	3	2	4	1	3	2								4	4	4	4	4	3	4	2	0	0	0	0	0	0	0	0	0	0	0	1
3702024	1	1987	8	2	4	2	1	1	2	1	1	1	2	2	6	4	2	2	4	4	2	3	2	0	0	1	0	0	0	0	1	0	0	0	2
3724024	2	1997	9	1	1	1	4	1	2	2	2	6	1	2	6	4	3	4	3	2	3	3	3	0	0	0	0	0	0	0	0	0	0	0	3
6105007	2	2001	8	1	2	3	4	1	2	1	1	1	1	1	6	3	3	2	3	3	3	3	3	0	0	0	0	0	0	0	0	0	0	0	2
3702020	2	1973	6	2	4	3	1	1	1	1	1	1	1	1	3	4	3	3	3	2	2	3	2	1	1	1	0	0	0	0	0	0	0	0	2
5134018	2	1983	3	2	4	1	3	1	5	3	6	6	6	4	6	3	3	3	3	3	3	3	3	0	0	0	0	0	0	0	0	0	0	0	3
3726002	2	1974	3	2	4	2	3	1	1	1	6	6	5	5	6	4	4	4	4	4	3	3	3	0	0	0	0	0	0	0	0	1	0	0	1
6208018	1	1980	2	2	4	1	1	2								4	4	4	4	4	4	4	4	0	0	0	0	0	0	0	1	0	0	0	1
3726025	2	1974	3	2	4	3	3	1	1	1	2	2	1	2	6	4	4	4	4	4	4	4	4	0	0	0	0	0	0	0	0	1	0	0	1
6205021	1	1981	8	2	4	2	1	1	1	3	1	6	1	3	6	4	3	3	4	4	3	3	3	0	0	0	1	0	0	0	0	0	0	0	2
6105023	2	1981	4	2	4	1	3	1	1	5	1	6	1	2	6	3	3	2	3	3	3	3	3	0	0	0	0	0	0	0	0	0	0	0	3
6208020	2	1955	2	5	1	1	1	2								-1	4	3	3	2	2	2	2	0	0	0	0	0	0	0	0	0	0	0	1
6119023	1	1958	2	2	1	1	1	1	6	1	1	6	6	6	6	4	4	4	4	-1	2	3	-1	0	0	0	0	0	0	0	0	0	0	0	1
6119024	1	1969	3	2	4	1	3	1	1	3	6	6	6	6	6	-1	3	3	3	3	3	3	1	0	0	0	0	0	0	0	0	0	0	0	1
3702023	2	1966	3	2	4	1	3	2								2	3	3	3	3	3	3	3	0	0	0	0	0	0	0	0	0	0	0	2
6208013	2	1990	2	2	4	1	3	1	6	6	1	6	6	4	6	2	2	2	4	4	4	4	2	0	0	0	0	0	0	0	0	0	0	0	2
85551628846466783	2	1982	8	2	4	2	1	1	2	1	2	6	2	3	4	2	3	3	3	3	3	3	3	0	0	0	0	0	0	0	0	0	0	0	2
85361628845939464	2	1999	8	1	2	2	1	1	1	1	1	1	1	2	3	3	3	4	4	3	3	3	3	0	0	1	0	0	0	0	0	0	0	0	2
83931628828458795	1	1972	3	2	4	1	3	2								3	-1	-1	-1	-1	-1	3	3	0	0	0	0	0	0	0	0	0	0	0	2
3720022	1	1985	8	2	1	2	1	1	2	4	1	1	3	2	3	4	4	4	4	3	4	4	4	0	0	0	0	0	0	0	1	1	0	0	1
6205010	1	1987	8	2	4	3	1	1	2	2	2	6	3	2	6	3	3	3	3	3	2	2	2	0	0	0	0	0	0	0	0	0	0	0	3
3741019	2	1999	8	1	4	1	4	1	1	1	1	6	1	1	6	4	4	3	3	3	2	3	2	1	0	0	0	0	0	0	0	0	0	0
3720024	1	1961	4	2	1	2	3	1	3	3	6	6	6	4	6	2	3	3	3	3	3	3	3	0	0	0	0	0	0	0	1	0	0	0	1
5134020	2	1975	3	5	4	3	2	1	5	1	5	6	6	5	6	3	3	3	3	3	2	3	3	0	0	0	0	0	0	0	0	0	0	0	2
85491628840821587	1	1953	2	3	4	1	3	2								4	4	4	4	4	-1	-1	1	0	0	0	0	0	0	0	1	0	0	0	1
63321628834923701	2	1960	3	2	4	1	1	1	3	1	1	6	6	6	6	4	3	3	2	2	1	3	2	0	0	0	0	0	1	0	1	0	0	0	1
3720014	1	1963	3	2	4	3	3	2								4	4	4	4	3	3	3	3	0	0	0	1	0	0	0	0	1	0	0	1
3720025	1	1960	3	2	1	3	3	1	1	3	1	6	2	6	6	3	3	3	3	3	3	3	3	0	0	0	0	0	0	0	0	0	0	0	1
3720012	1	1965	8	2	1	3	1	2								3	3	3	3	3	2	4	3	0	0	0	0	0	0	0	0	0	0	0	1
3726019	1	1962	4	2	4	2	3	1	1	2	6	6	6	5	6	3	2	3	2	3	1	2	3	0	0	0	0	0	0	0	0	0	0	0	3
3702014	2	1977	3	2	4	1	3	1	3	2	1	6	6	2	6	3	3	3	3	3	3	3	3	0	0	0	0	0	0	0	0	0	0	0	3
6204008	1	1972	4	2	4	1	3	1	6	1	4	6	6	6	6	-1	2	-1	2	-1	-1	2	2	0	0	0	0	0	0	0	0	0	0	0	1
85501628840377904	2	1962	4	2	4	1	3	2								4	3	3	3	2	2	-1	3	0	0	0	0	1	0	0	0	0	0	0	3
3723024	2	1957	1	2	4	1	3	2								4	4	4	4	4	4	4	4	0	0	0	0	0	0	0	0	0	0	0	3
6208001	2	1973	1	2	4	1	3	2								2	2	3	3	3	2	2	2	0	0	0	0	0	0	0	0	0	0	0	2
5134003	1	1971	7	2	4	2	1	1	1	1	1	6	4	1	6	3	3	3	3	3	3	3	3	1	0	0	0	1	0	0	1	0	0	0	1
3726008	1	1983	8	2	1	2	1	1	1	3	1	6	1	4	6	4	4	3	3	3	3	3	3	1	0	0	0	0	0	0	0	0	0	0	2
3726014	2	1957	3	2	4	2	3	2								3	-1	2	3	3	1	3	3	0	0	0	0	0	0	0	0	0	0	0	2
3726010	1	1954	4	3	4	3	3	2								3	4	2	4	3	3	1	3	0	0	0	0	0	0	0	0	0	0	0	2
83921628828297085	2	1984	7	2	4	1	2	1	4	2	2	6	5	3	6	3	3	3	-1	-1	-1	3	2	0	0	0	0	0	0	0	0	0	0	0	2
3723023	2	1983	7	2	4	2	3	1	1	1	1	6	6	4	6	3	4	4	4	4	4	3	3	0	0	0	0	0	0	0	0	0	0	0	3
3720011	2	1980	5	2	4	3	3	1	2	1	1	6	1	4	6	3	2	3	3	3	3	3	3	0	0	1	0	0	0	0	0	1	0	0	2
6208017	2	1953	1	2	4	1	3	2								-1	3	3	3	4	4	3	2	0	0	0	0	0	0	0	0	0	0	0	1
85361628838401689	2	1953	2	2	4	1	1	1	6	1	1	6	6	6	6	-1	3	4	4	4	4	2	2	0	0	0	0	0	0	0	0	0	0	0	2
3741002	1	1993	4	1	4	1	2	1	2	3	1	6	6	1	6	4	1	2	3	2	2	2	2	1	0	0	0	0	0	0	0	1	0	0	2
85381628836475545	2	1961	1	2	4	1	1	2								3	3	3	3	3	3	3	3	0	0	0	0	0	0	0	0	0	0	0
5126007	2	1969	2	2	4	1	1	1	2	1	1	6	6	6	6	4	3	3	3	3	3	3	3	0	0	0	0	0	0	0	1	0	0	0	1
3720002	1	1956	4	2	4	3	1	1	1	6	1	1	1	3	6	3	3	3	3	3	2	3	3	0	0	0	0	0	0	0	0	1	0	0	1
6119025	1	1964	2	2	4	1	1	2								3	3	3	3	3	3	3	3	0	0	0	0	0	0	0	0	0	0	0	1
6208007	1	1983	2	2	4	1	1	1	3	1	1	6	6	4	6	-1	3	3	3	-1	-1	3	-1	0	0	0	0	0	0	0	0	0	0	0	1
5110013	2	1987	4	2	4	1	1	1	1	1	2	6	1	2	6	2	2	1	3	2	3	4	3	0	0	0	0	0	0	0	0	0	0	0	2
63311628836627725	1	1962	4	2	4	1	1	1	3	2	1	6	6	6	6	4	4	3	3	3	2	4	2	0	0	0	0	0	0	0	1	0	0	0	1
5134001	1	1951	1	2	4	3	3	2								3	3	4	3	3	3	3	3	0	0	0	0	0	0	0	1	0	0	0	1
5110009	2	1953	2	2	4	1	1	2								3	3	3	3	3	2	3	3	0	0	0	0	0	0	0	0	0	0	0	1
5134006	1	1971	2	3	4	1	1	1	2	3	6	6	6	5	6	3	3	3	3	3	3	3	3	0	0	0	0	0	0	0	0	0	0	0	2
5134008	1	1970	3	2	4	1	1	1	2	3	6	1	4	3	6	4	3	4	3	3	3	3	4	0	0	0	0	0	0	0	1	1	0	0	2
5134012	2	1956	2	2	4	1	3	2								4	3	3	1	3	3	3	3	0	0	0	0	0	0	0	1	0	0	0	1
6208022	2	1989	1	2	4	1	3	1	6	6	1	6	6	4	6	2	3	3	3	3	3	2	3	0	0	0	0	0	0	0	0	0	0	0	2
5110019	2	1954	1	2	4	1	3	2								4	4	3	3	3	3	4	2	0	0	0	0	0	0	0	0	0	0	0	2
83261628834060247	1	1971	3	4	4	1	2	1	2	6	6	6	3	3	6	3	3	3	2	1	1	2	1	0	0	0	0	0	0	0	0	0	0	0	1
3726013	2	1990	9	2	1	2	1	1	1	1	1	6	1	2	6	3	3	3	3	3	3	3	3	0	0	0	0	1	0	0	0	0	0	1
3726016	1	1956	4	2	1	3	3	1	1	1	6	6	2	5	6	3	3	3	3	3	3	2	2	0	0	1	0	0	0	0	0	1	0	0	2
3726018	2	1973	3	2	4	2	1	2								3	3	3	3	3	3	3	3	0	0	0	0	0	0	0	0	0	0	0	2
3726009	2	1953	1	2	4	2	3	2								4	-1	-1	3	-1	-1	1	3	0	0	0	0	0	0	0	0	0	0	0	2
3741011	2	1966	2	2	4	1	3	1	6	1	1	6	6	2	6	3	3	3	3	2	2	1	2	0	0	0	0	0	0	0	0	0	0	0
5113005	2	1996	9	1	2	2	4	1	1	1	1	1	1	1	6	3	3	3	3	3	3	3	3	0	0	0	0	0	0	0	0	0	0	0
5110005	2	1953	2	2	4	1	1	2								-1	3	3	3	-1	-1	3	3	0	0	0	0	0	0	0	0	0	0	0	1
5113021	2	1973	3	2	4	1	3	2								3	3	3	3	3	3	3	3	0	0	0	0	0	0	0	0	0	0	0	2
5110001	1	1965	3	2	4	1	1	2								3	3	3	3	3	3	3	3	0	0	0	0	0	0	0	0	0	0	0	1
5110021	2	1958	1	5	4	1	1	2								2	-1	-1	-1	3	2	-1	3	0	0	0	0	0	0	0	1	0	0	0	1
85251628821644322	2	1979	3	2	4	1	3	2								4	4	4	4	4	4	4	4	0	0	0	0	0	0	0	0	0	0	0	2
83691628758394789	2	1958	1	2	4	1	1	2								4	4	4	4	4	4	4	4	0	0	0	0	0	0	0	1	0	0	0	1
5110022	1	1986	2	1	4	1	1	1	3	6	6	6	6	5	6	3	2	1	2	2	2	1	1	0	0	0	0	0	0	0	0	0	0	0	2
5110018	2	1970	2	2	4	1	3	2								3	3	3	3	3	3	3	3	0	0	0	0	0	0	0	0	0	0	0	1
63371628827749121	2	2000	8	1	2	3	4	1	3	3	3	3	3	3	6	4	3	3	3	3	3	3	3	0	1	0	0	0	0	0	0	0	0	0	2
6204006	2	1966	2	2	4	1	3	1	1	1	2	6	2	6	6	4	-1	-1	3	-1	3	3	3	0	0	0	0	0	0	0	0	0	0	0	2
63361628825325855	2	1967	3	3	4	2	3	2								3	3	3	3	4	3	3	3	0	0	0	0	0	0	0	0	0	0	0	2
5110020	2	1958	2	2	4	1	1	2								4	-1	3	3	3	2	2	2	0	0	0	0	0	0	0	0	0	0	0	2
6111006	1	1971	3	2	4	1	3	2								4	3	3	4	4	4	2	3	0	0	1	0	0	0	0	0	0	0	0	1
5134024	1	1969	3	2	4	1	2	1	1	2	3	6	6	4	6	4	4	4	4	4	2	3	3	0	0	0	0	0	0	0	0	0	0	0	3
5134002	1	1975	3	2	4	1	2	1	2	2	2	6	6	6	6	4	4	4	2	4	4	2	3	0	0	0	0	0	0	0	0	0	0	0	2
3723021	2	1954	2	5	4	2	3	2								3	-1	4	-1	-1	2	-1	4	0	0	0	0	0	0	0	0	0	0	0	3
85551628823622455	2	1977	3	2	4	1	3	1	2	1	2	5	5	2	6	4	4	4	4	4	3	3	3	0	0	0	0	0	0	0	0	0	0	0	2
3723016	1	1962	2	2	4	1	3	2								2	2	2	2	2	2	2	2	0	0	0	0	0	0	0	0	0	0	0	3
5113003	2	1976	2	4	4	1	1	2								-1	1	2	2	2	2	3	2	0	0	0	0	0	0	0	0	0	0	0	2
63331628824866157	2	1974	3	2	4	1	3	1	2	2	2	6	6	3	6	3	3	3	3	2	2	1	2	0	0	0	0	0	0	0	0	0	0	0	2
5110003	1	1957	2	2	4	1	1	2								4	4	4	4	4	4	4	4	0	0	0	0	0	0	0	1	0	0	0	1
5126016	1	1958	1	1	4	1	1	2								4	4	4	4	4	4	2	1	0	0	0	0	0	0	0	1	0	0	0	1
5134014	1	2003	4	1	2	3	4	1	3	2	1	6	2	3	6	3	3	3	3	3	3	3	3	0	0	0	0	0	0	0	0	1	0	0
5113017	2	1981	9	2	1	3	1	1	1	1	1	1	4	1	4	3	3	3	3	3	3	3	3	0	0	0	0	0	0	0	0	0	0	0	2
63341628822487993	2	1966	3	2	4	3	3	2								4	4	3	3	4	4	3	3	0	0	0	0	0	0	0	0	0	0	0	3
5110024	1	1964	2	2	4	1	1	2								-1	-1	2	3	2	2	2	2	0	0	0	0	0	0	0	0	0	0	0	2
5113016	2	2003	4	1	2	1	4	1	1	1	1	6	2	4	6	3	3	3	3	2	2	3	3	1	0	0	0	0	0	0	0	0	0	0	2
3741012	2	1977	1	4	4	1	3	2								4	4	4	4	4	4	4	4	0	0	0	0	0	0	0	0	1	0	0	2
63331628821457233	1	1965	3	2	4	1	1	1	1	1	1	1	6	3	6	3	3	3	3	3	3	3	3	0	0	0	0	0	0	0	1	0	0	0	2
6111018	2	1969	3	2	1	1	1	1	4	1	1	6	5	4	6	3	3	2	2	3	3	3	1	0	0	0	0	0	0	0	1	0	0	0	1
5110002	2	1970	1	2	4	1	1	2								-1	3	3	3	3	3	3	3	0	0	0	0	0	0	0	0	0	0	0	1
3741022	1	1984	8	1	4	1	1	1	5	1	5	1	1	2	2	1	1	2	3	3	1	3	4	1	0	1	0	0	0	0	0	1	0	0	2
5110016	2	1958	1	2	4	1	3	2								2	3	-1	3	3	3	2	3	0	0	0	0	0	0	0	0	0	0	0	2
85381628816455938	2	2000	8	1	2	1	4	1	1	1	1	2	2	3	6	4	4	4	3	2	2	3	2	0	0	0	0	0	0	0	0	0	0	0	1
3723009	1	1982	3	2	4	1	1	1	1	6	1	1	1	1	6	3	2	3	3	2	3	3	2	0	0	0	0	0	0	0	0	0	0	0	2
85471628820132114	2	1987	4	2	4	1	1	2								4	4	4	4	4	4	4	4	0	0	0	0	0	0	0	0	0	0	0	1
63241628820578621	2	1953	1	2	4	1	1	2								4	4	4	4	-1	4	4	4	0	0	0	0	0	0	0	1	0	0	0	1
3727002	1	1967	3	2	4	1	1	1	6	1	6	6	6	6	6	-1	1	3	3	3	3	1	3	0	0	0	0	0	0	0	0	0	0	0	2
3702016	2	1997	9	1	1	2	4	1	1	1	1	6	2	3	6	3	3	3	3	3	3	3	2	1	0	0	1	0	0	0	0	1	0	0	1
85411628813479022	2	1990	4	2	4	1	1	1	1	1	1	1	3	2	6	3	3	3	3	2	2	3	2	0	1	0	0	1	0	0	1	0	0	0	3
5126001	2	1968	2	2	4	1	1	1	6	1	3	6	6	6	6	3	3	3	3	3	3	3	3	0	0	0	0	0	0	0	1	0	0	0	1
5110014	2	1966	2	3	4	1	3	1	6	1	2	6	6	6	6	4	4	4	4	2	2	2	2	0	0	0	0	0	0	0	1	0	0	0	1
3722020Rp8548	1	1953	3	2	4	1	3	2								4	4	4	4	4	3	4	2	0	0	0	0	0	0	0	0	0	0	0	1
5110015	1	1959	4	2	1	1	1	1	6	1	1	6	6	6	6	3	2	3	2	2	1	3	1	0	0	0	0	0	0	0	1	0	0	0	1
3741004	1	1996	7	1	2	1	1	1	4	4	5	2	5	3	6	3	3	3	3	3	3	3	3	0	0	0	0	0	0	0	0	0	0	0	2
3723001	2	1955	1	2	4	1	1	2								3	4	4	4	4	2	4	4	0	0	0	0	0	0	0	0	0	0	0	1
5110006	1	1963	3	2	4	1	1	2								3	3	3	3	3	3	3	3	0	0	0	0	0	0	0	0	0	0	0	1
3701021	2	1976	3	2	4	1	3	2								3	3	3	3	3	3	3	3	0	0	0	0	0	0	0	0	0	0	0	1
5110007	2	1988	2	2	4	1	1	2								2	1	3	3	3	3	3	3	0	0	0	0	0	0	0	0	0	0	0	2
5126006	2	1957	1	2	4	1	1	2								4	3	4	4	3	3	4	2	0	0	0	0	0	0	0	1	1	0	0	1
3741006	2	1989	5	2	2	1	3	1	3	1	2	6	2	3	6	2	3	3	3	2	3	2	1	0	0	0	0	0	0	0	0	0	0	0	2
3701022	1	1983	4	2	4	1	1	1	2	1	6	1	1	2	6	3	3	3	3	3	2	4	2	0	0	0	0	0	0	0	0	0	0	0	2
3726007	2	1961	4	2	4	2	3	1	1	3	6	6	6	6	6	4	3	3	3	4	1	1	1	1	0	0	0	0	0	0	0	0	0	0	2
3701001	2	1962	2	2	4	1	3	2								-1	-1	3	2	2	2	2	2	0	0	0	0	0	0	0	0	0	0	0	1
3701014	2	1984	8	2	4	1	2	1	1	1	1	1	3	1	5	4	4	4	4	3	4	4	4	0	0	0	0	0	0	0	0	0	0	0	1
3726021	2	1973	3	2	4	2	1	2								1	2	3	3	3	3	3	3	0	0	0	0	0	0	0	0	0	0	0	2
5126021	2	1966	2	5	4	1	1	1	2	2	2	6	6	6	6	3	2	3	2	2	1	1	1	0	0	0	0	0	0	0	1	0	0	0	1
85401628813492866	1	1978	7	2	4	2	1	1	5	1	3	6	6	2	6	3	3	3	3	3	3	3	3	0	0	0	0	0	0	0	0	0	0	0	2
85431628813429128	2	1971	2	5	4	2	3	1	1	1	4	6	6	5	6	4	4	3	2	1	4	1	1	0	0	1	0	0	0	0	0	0	0	0	2
6111019	2	2003	4	1	4	1	4	1	4	1	1	6	6	5	6	4	3	3	3	3	2	2	2	0	0	0	0	0	0	0	0	0	0	0	2
6111015	2	1981	3	2	4	1	2	1	2	1	1	2	2	2	6	4	4	4	4	4	3	3	3	0	0	0	0	0	0	0	0	0	0	0	2
3727011	1	1952	2	2	4	1	1	2								4	4	4	4	4	4	4	4	0	0	0	0	0	0	0	0	0	0	0	1
3701003	2	1997	8	2	1	3	1	1	1	1	1	1	1	2	6	3	3	3	2	2	2	3	1	1	0	0	0	1	1	0	0	0	0	0	1
83771628771663751	1	1955	4	2	1	2	3	1	1	1	1	6	3	6	6	4	4	2	3	3	3	3	3	0	0	0	0	0	0	0	0	0	0	0	2
3702005	1	1991	3	2	4	1	1	1	2	1	1	1	3	4	6	4	3	3	3	3	3	3	3	0	0	0	0	0	0	0	0	0	0	0	2
3723007	1	1994	3	2	4	1	1	1	6	1	2	1	6	1	6	3	2	2	2	3	3	1	2	0	0	0	0	0	0	0	0	0	0	0
3702010	1	1984	8	2	4	2	1	1	1	1	1	1	1	1	1	4	4	4	4	3	3	3	2	1	1	1	1	1	0	0	1	1	0	1	2
3702009	2	1986	3	2	4	1	1	1	6	1	1	6	4	3	6	4	3	-1	3	4	4	2	2	0	0	0	0	0	0	0	0	0	0	0	2
6208016	1	1979	2	2	4	1	1	1	1	1	1	6	6	5	6	3	4	4	4	3	3	2	1	0	0	1	0	0	0	0	0	0	0	0	1
3702022	2	1976	3	2	4	3	1	1	1	2	1	6	6	4	6	3	3	-1	3	-1	3	-1	3	0	0	0	0	0	0	0	0	0	0	0	3
[truncated: 8,137 more rows]
