# Supplementary material
Source: Research Square preprint supplement (doi:10.21203/rs.3.rs-9075421/v1)
Supplement: Supplementary file 1 [file ed279d3a3db73396e3d822d8.docx]

**Data and methods**

This study employs data from the 2021 Chinese Social Survey (CSS2021), a nationally representative, continuous survey project administered by the Institute of Sociology at the Chinese Academy of Social Sciences. The survey covers 151 counties (districts/cities) across 31 provincial-level units in China. Its target population is urban and rural residents aged 18–69, yielding a total of 10,136 valid responses.Guided by the youth age range (14–35 years) defined in China’s *Medium- and Long-Term Youth Development Plan (2016–2025)* and considering the structure of the CSS2021 sample, we limit our analysis to respondents aged 18–35. To sharpen the focus of the inquiry, the raw data were filtered according to study‑specific criteria, primarily age (18–35) and internet use status. To ensure data quality, observations that were irrelevant to the research aims or contained excessive missing values were removed.After these procedures, 2,019 valid cases were retained for empirical analysis. This sample size fulfills the basic requirements for model estimation and hypothesis testing in this study and offers reasonable representativeness and analytical reliability.

**Explained variable**

This study uses political participation as the dependent variable, representing the political participation of research subjects. Drawing on Zhang et al. (2024), political participation is measured through questionnaire item H2a: “In the past two years, have you participated in any of the following activities?” Specifically, it includes: “Reporting social issues to media outlets such as newspapers, radio stations, or online forums”; “Submitting opinions to government departments (including via phone, email, etc.)”; “Expressing personal views on government policies through various channels”; “Discussing political issues with others or online users”; “Participating in collective online/offline rights protection actions”; “Engaging in discussions on major decision-making processes within your village/community or workplace”; and “Attending public hearings on public policies organized by government departments.” “Expressing personal opinions on government policies through various channels,” “Discussing political issues with others or online users,” “Participating in collective rights defense actions online/offline,” “Participating in major decision-making discussions in your village/community or workplace,” and “Attending public policy hearings organized by government departments.” The second explanatory variable is “voting participation,” measured by the item H3b: “Did you vote in the most recent election (village committee/neighborhood committee election)?” “Did you vote in the most recent election (neighborhood committee/village committee election)?”

First, principal component analysis was applied, followed by factor analysis using the maximum variance method on the eight items. This extracted two common factors with eigenvalues greater than 1 (Table 1). The table shows that the items “Reporting social issues to newspapers,” “Expressing opinions to the government, ”“Expressing personal views on policies,”“Discussing political issues,”and “Participating in rights defense actions” loaded heavily on Common Factor 1, while “Participating in major decision discussions,”“Participating in neighborhood committee voting,” and “Attending hearings” loaded heavily on Common Factor 2. Therefore, based on the corresponding item meanings, Common Factor 1 was named “Non-institutionalized Political Participation,” and Common Factor 2 was named “Institutionalized Political Participation.”

**Table 1 Factor loading analysis of political participation scale**

|  | Ingredient 1 | Ingredient 2 |
| --- | --- | --- |
| Report social issues to newspapers and periodicals (online forums) | 0.604 | -0.104 |
| Report opinions to government  departments | 0.586 | 0.273 |
| Express personal opinions on policy | 0.536 | 0.154 |
| discuss political issues | 0.549 | -0.115 |
| Participate in online/offline  collective rights protection actions | 0.505 | -0.029 |
| Participate in major decision-making discussions in the village | -0.013 | 0.744 |
| Participate in voting in village  committee elections | -0.175 | 0.615 |
| attend hearing | 0.240 | 0.587 |
| KMO sampling suitability quantity | 0.617 | |
| Bartlett's test of sphericity  approximates chi-square | 738.195 | |
| Significance | 0.000 | |
| Rotation load square percentage | 20.524 | 17.493 |

**Explanatory variables**

The explanatory variable in this study is social fairness perceptions. Following the methodology of Liu & Wang (2023), social fairness perceptions is measured through questionnaire item F3a: “How fair do you perceive the following aspects of contemporary social life to be?” This includes eight indicators: “college entrance examination system,” “political rights,” “judicial and law enforcement,” “public healthcare,” “employment opportunities,” “income distribution,” “social security benefits,” and “urban-rural disparities.” The original scoring for each indicator is defined as follows: “extremely unfair=1, somewhat unfair=2, fair=3, extremely fair=4, and unsure=-1.” This study converted the original scores into a scale where “extremely unfair=1, somewhat unfair=2, hard to say=3, somewhat fair=4, extremely fair=5.” Higher scores indicate a stronger social fairness perceptions

**Moderator variable**

This study selects internet usage as a moderating variable to further explore the relationship between social fairness perceptions and youth political participation. Internet usage encompasses both internet access and frequency of use. Given the characteristics of this research and practical considerations, only a very small minority of young people do not use the internet at all. Therefore, “internet usage” here primarily refers to “internet usage frequency,” excluding samples that do not use the internet. Following Tang & Ye (2022), the measurement of “frequency of engaging in the following online activities” is conducted through item D5b: “How often do you engage in the following activities online?” to measure seven indicators: “Browsing political news,” “Entertainment and leisure,” “Chatting and making friends,” “Business and work,” “education, ” “online services,” and “investment and financial management.” Response options were coded as follows: “almost daily=1, multiple times per week=2, at least once per week=3, at least once per month=4, several times per year=5, and never=0.” Raw scores were converted to: “almost daily=6, multiple times per week=5, at least once per week=4,at least once per month=3,several times per year=2, and never=1.” Summing all items and taking the average yields a score where higher values indicate stronger internet usage.

**Control variables**

The control variables selected by this study to reflect the individual characteristics of the research subjects include gender, age, educational attainment, marital status, political identity, household registration status, and employment status. The specific assignment rules are shown in Table 2.

**Table 2 Variable assignment and descriptive statistics (N=2019)**

| Variable | Question | Assignment | Mean (standard  deviation) | |
| --- | --- | --- | --- | --- |
| gender | Male=1; Female=0 | | 0.422（0.494） | |
| education level | Junior high school and below=1; high school (technical secondary school and higher vocational school)=2; college and above=3 | | 2.233（0.849） | |
| Marital  status | Married=1; Unmarried=0 | | 0.516（0.500） | |
| working status | Working=1; Not working=0 | | 0.497（0.500） | |
| political outlook | Party member (Democratic Party)=1; non-party member=0 | | 0.367（0.482） | |
| Househo-ld registration | Agricultural household registration=1;  non-agricultural household registration=0 | | 0.597（0.491） | |
| institutionalized political participation | Participate in major decision-making  discussions | Participated=1;  Never participated=0 | 0.123  （0.200） | 0.065（0.246） |
| Participate in village committee voting | 0.283（0.450） |
| attend hearing | 0.022（0.146） |
| non-institutionalized political participation | Report social issues to newspapers and  periodicals | 0.094  （0.150） | 0.044（0.205） |
| Report opinions to  the government | 0.066（0.248） |
| Comment on policy | 0.038（0.192） |
| discuss political  issues | 0.292（0.455） |
| Participate in rights protection actions | 0.030（0.171） |
| Internet  Use | Browse current  affairs information | Original assignment: almost every day=1, many times a week=2, at least once a week=3, at least once a month=4, several times a year=5, never=0;  Assigned values after conversion: almost every day=6, many times a week=5, at least once a week=4, at least once a month=3, several times a year=2, never=1 | 3.953  （0.891） | 4.514（1.611） |
| entertainment, leisure | 5.291（1.199） |
| Chat and make  friends | 5.407（1.182） |
| business or work | 2.904（2.225） |
| study education | 3.832（1.947） |
| Online shopping and life services | 4.098（1.341） |
| Investment and  financial management | 1.625（1.358） |
| perceptions of social justice | college entrance  examination system | Original assignment: very unfair=1, not very fair=2,  relatively fair=3, very fair=4, hard to say=-1;  Assignment after conversion: Very unfair=1, Not very fair=2, Hard to say=3, Fairly fair=4,  Very fair=5 | 3.712  （0.707） | 4.118（0.977） |
| political rights | 3.847（1.023） |
| Justice and Law  Enforcement | 3.965（0.939） |
| public health | 3.918（0.871） |
| Employment  opportunities | 3.468（1.073） |
| income distribution | 3.292（1.154） |
| social security  benefits | 3.767（0.963） |
| Urban and rural  differences | 3.358（1.155） |
