# Supplementary material
Source: Research Square preprint supplement (doi:10.21203/rs.3.rs-9075421/v1)
Supplement: Supplementary file 2 [file d3c8afbd3a349159debd6049.xlsx]

## Sheet: 青年政治参与2019份6-14（
性别	年龄	教育程度	婚姻状况	政治面貌	户籍	工作情况	是否上网	a1浏览时政信息	a2娱乐、休闲	a3聊天交友	a4商务或者工作	a5学习教育	a6网上购物生活服务	a7投资理财	b1高考制度	b2公民政治权利	b3司法与执法	b4公共医疗	b5工作与就业机会	b6财富及收入分配	b7养老等社会保障待遇	b8城乡之间的权利、待遇	c1讨论政治问题	c2向报刊反映社会问题	c3.向政府部门反映意见	c4.利用专业知识参与公共政策	c5.对政府公布的政策发表个人意见	c6出席听证会	c7到政府部门上访	c8.参加所在村居单位的重大决策讨论	c9.社会公益活动	c10参加宗教活动	c11集体性维权行动	c12村委投票	性别新	教育新	婚姻新	政治新	户籍新	工作新	A1	A2	A3	A4	A5	A6	A7	B1	B2
2	25	2	2	4	1	3	1	6	1	1	6	6	3	6	3	3	3	3	3	3	3	3	0	0	0	0	0	0	0	0	0	0	0	1	0	1	1	0	1	0	#NULL!	6	6	#NULL!	#NULL!	4	#NULL!	4	4
1	21	7	1	4	1	1	1	5	2	2	2	3	4	6	3	3	2	3	2	3	2	2	0	0	0	0	0	0	0	0	0	0	0	1	1	3	0	0	1	1	2	5	5	5	4	3	#NULL!	4	4
2	30	3	2	4	1	3	1	2	1	1	6	6	1	6	3	3	3	3	3	3	3	3	0	0	0	0	0	0	0	0	0	0	0	1	0	1	1	0	1	0	5	6	6	#NULL!	#NULL!	6	#NULL!	4	4
2	30	1	2	4	1	3	1	2	3	1	6	6	3	6	-1	-1	2	1	-1	1	1	1	0	0	0	0	0	0	0	0	0	0	0	2	0	1	1	0	1	0	5	4	6	#NULL!	#NULL!	4	#NULL!	3	3
2	19	8	1	2	1	4	1	2	1	1	6	3	3	6	4	3	3	3	2	3	3	3	1	0	0	0	0	0	0	0	0	0	0	1	0	3	0	1	1	0	5	6	6	#NULL!	4	4	#NULL!	5	4
2	33	3	2	4	1	3	1	2	1	1	6	6	6	6	3	2	3	3	2	1	3	1	0	0	0	0	0	0	0	0	0	0	0	1	0	1	1	0	1	0	5	6	6	#NULL!	#NULL!	#NULL!	#NULL!	4	2
1	32	2	1	4	1	1	1	1	1	2	6	6	5	6	-1	3	3	1	3	3	-1	1	0	0	0	0	0	0	0	0	0	0	0	1	1	1	0	0	1	1	6	6	5	#NULL!	#NULL!	2	#NULL!	3	4
1	35	3	2	4	1	1	1	6	1	6	1	6	5	6	4	-1	1	1	-1	3	1	-1	0	0	0	0	0	0	0	0	0	0	0	1	1	1	1	0	1	1	#NULL!	6	#NULL!	6	#NULL!	2	#NULL!	5	3
1	18	3	1	4	2	4	1	3	1	1	2	2	2	6	4	4	3	3	3	3	3	4	1	0	0	0	0	0	0	1	1	0	0	2	1	1	0	0	0	0	4	6	6	5	5	5	#NULL!	5	5
2	25	7	2	2	1	3	1	2	2	1	6	2	4	6	3	3	3	3	3	3	4	3	0	0	0	0	0	0	0	0	0	0	0	2	0	3	1	1	1	0	5	5	6	#NULL!	5	3	#NULL!	4	4
1	35	3	2	4	1	1	1	2	2	6	6	6	4	6	3	3	3	2	2	2	3	2	0	0	0	0	0	0	0	0	0	0	0	2	1	1	1	0	1	1	5	5	#NULL!	#NULL!	#NULL!	3	#NULL!	4	4
2	34	3	2	4	1	1	1	2	1	2	6	6	5	6	2	2	3	1	3	3	1	1	0	0	0	0	0	0	0	0	0	0	0	1	0	1	1	0	1	1	5	6	5	#NULL!	#NULL!	2	#NULL!	2	2
2	22	7	1	2	1	2	1	3	1	3	6	1	3	6	4	4	4	4	4	3	3	3	0	0	0	0	0	0	0	0	0	0	0	2	0	3	0	1	1	1	4	6	4	#NULL!	6	4	#NULL!	5	5
1	22	3	1	2	1	3	1	3	1	1	2	3	3	6	3	3	3	3	3	3	3	3	0	0	0	0	0	0	0	0	0	0	0	1	1	1	0	1	1	0	4	6	6	5	4	4	#NULL!	4	4
2	24	3	2	4	1	2	1	2	1	2	1	2	1	2	3	2	2	1	3	3	3	3	1	0	1	0	0	0	0	0	0	0	0	2	0	1	1	0	1	1	5	6	5	6	5	6	5	4	2
2	31	3	2	2	1	3	1	3	1	1	5	6	5	6	4	3	1	1	1	1	3	1	0	0	0	0	0	0	0	0	0	0	0	2	0	1	1	1	1	0	4	6	6	2	#NULL!	2	#NULL!	5	4
1	26	7	1	2	2	1	1	1	1	1	1	5	1	5	3	2	2	3	3	3	3	3	1	0	0	0	0	0	0	0	0	0	0	2	1	3	0	1	0	1	6	6	6	6	2	6	2	4	2
1	30	5	2	4	3	3	1	3	4	3	6	6	2	6	3	3	3	3	3	3	3	3	0	0	0	0	0	0	0	0	0	0	0	2	1	2	1	0	0	0	4	3	4	#NULL!	#NULL!	5	#NULL!	4	4
1	34	7	1	4	2	3	1	1	2	1	3	3	3	6	4	4	4	4	3	3	4	4	0	0	0	0	0	0	0	0	0	0	0	2	1	3	0	0	0	0	6	5	6	4	4	4	#NULL!	5	5
1	20	3	1	4	3	3	1	5	1	1	5	5	1	6	3	3	3	3	3	3	3	3	0	0	0	0	0	0	0	0	0	0	0	2	1	1	0	0	0	0	2	6	6	2	2	6	#NULL!	4	4
2	28	5	1	4	1	3	1	1	1	3	6	6	3	6	3	3	3	3	2	1	3	3	0	0	0	0	0	0	0	0	0	0	0	2	0	2	0	0	1	0	6	6	4	#NULL!	#NULL!	4	#NULL!	4	4
1	20	3	1	4	1	2	1	4	1	1	1	6	1	1	-1	3	4	4	4	4	4	4	0	0	0	0	0	0	0	0	0	0	0	2	1	1	0	0	1	1	3	6	6	6	#NULL!	6	6	3	4
2	19	8	1	2	1	4	1	3	1	1	2	1	2	6	3	3	3	3	2	3	3	3	1	0	0	1	0	0	0	0	0	0	0	2	0	3	0	1	1	0	4	6	6	5	6	5	#NULL!	4	4
1	28	5	2	4	1	2	1	2	2	6	1	4	4	6	3	2	2	2	2	3	3	2	0	0	0	0	0	0	0	0	0	0	0	1	1	2	1	0	1	1	5	5	#NULL!	6	3	3	#NULL!	4	2
1	20	2	1	4	3	3	1	6	1	1	6	6	3	6	1	2	2	2	2	2	2	2	0	0	0	0	0	0	0	0	0	0	0	2	1	1	0	0	0	0	#NULL!	6	6	#NULL!	#NULL!	4	#NULL!	1	2
1	23	5	1	4	3	2	1	6	1	1	1	4	4	6	4	4	3	3	2	1	3	2	1	0	0	0	0	0	0	0	0	0	0	2	1	2	0	0	0	1	#NULL!	6	6	6	3	3	#NULL!	5	5
1	23	4	1	4	1	2	1	2	2	2	2	2	2	6	4	3	3	3	3	3	3	3	0	0	0	0	0	0	0	0	0	0	0	2	1	2	0	0	1	1	5	5	5	5	5	5	#NULL!	5	4
1	24	8	1	2	2	3	1	4	1	1	5	4	4	6	3	3	4	3	3	2	3	3	0	0	0	1	0	0	0	0	0	0	1	2	1	3	0	1	0	0	3	6	6	2	3	3	#NULL!	4	4
1	20	8	1	2	1	4	1	1	1	1	3	2	4	6	4	4	4	4	4	3	3	3	1	0	0	0	0	0	0	0	0	0	0	2	1	3	0	1	1	0	6	6	6	4	5	3	#NULL!	5	5
2	28	3	2	4	1	3	1	1	2	2	6	6	4	6	3	2	2	2	2	2	2	2	0	0	0	0	0	0	0	0	0	0	0	1	0	1	1	0	1	0	6	5	5	#NULL!	#NULL!	3	#NULL!	4	2
1	35	7	1	4	1	1	1	1	1	1	1	1	1	6	3	1	2	3	2	1	3	2	1	0	0	0	0	0	0	0	0	0	0	2	1	3	0	0	1	1	6	6	6	6	6	6	#NULL!	4	1
2	31	3	2	4	1	1	1	1	1	1	1	1	1	1	3	3	3	3	3	3	3	3	0	0	0	0	0	0	0	0	0	0	0	2	0	1	1	0	1	1	6	6	6	6	6	6	6	4	4
1	31	2	1	4	1	1	1	1	1	1	6	6	4	6	4	4	3	3	3	3	3	3	0	0	0	0	0	0	0	0	0	0	0	1	1	1	0	0	1	1	6	6	6	#NULL!	#NULL!	3	#NULL!	5	5
2	35	3	2	4	1	3	1	4	4	1	6	2	2	6	2	3	3	2	2	2	2	3	1	0	0	0	0	0	0	0	0	0	0	2	0	1	1	0	1	0	3	3	6	#NULL!	5	5	#NULL!	2	4
2	27	7	2	4	2	3	1	1	3	1	1	1	4	6	3	3	3	3	3	3	3	3	0	0	1	0	0	0	0	0	1	0	0	1	0	3	1	0	0	0	6	4	6	6	6	3	#NULL!	4	4
1	29	7	1	4	1	2	1	1	2	1	6	2	2	1	3	3	3	3	3	3	3	3	1	1	0	0	0	0	0	0	0	0	0	1	1	3	0	0	1	1	6	5	6	#NULL!	5	5	6	4	4
1	24	7	1	2	2	1	1	1	1	1	6	3	4	5	4	3	3	3	3	3	3	3	1	0	0	0	0	0	0	0	1	0	0	2	1	3	0	1	0	1	6	6	6	#NULL!	4	3	2	5	4
1	23	5	1	2	2	1	1	3	1	1	6	6	3	6	4	4	3	3	3	3	4	3	0	0	0	0	0	0	0	0	0	0	0	2	1	2	0	1	0	1	4	6	6	#NULL!	#NULL!	4	#NULL!	5	5
1	30	7	2	1	3	1	1	4	1	6	1	4	5	6	2	3	2	3	3	2	3	2	1	0	1	0	0	1	0	1	1	0	0	1	1	3	1	1	0	1	3	6	#NULL!	6	3	2	#NULL!	2	4
1	22	9	1	2	2	4	1	1	1	1	5	3	2	1	4	3	3	2	2	2	3	2	1	0	0	0	0	0	0	0	0	0	0	2	1	3	0	1	0	0	6	6	6	2	4	5	6	5	4
2	31	8	2	4	3	1	1	1	1	1	1	1	1	1	3	3	3	3	3	3	3	3	0	0	0	0	0	0	0	0	0	0	0	2	0	3	1	0	0	1	6	6	6	6	6	6	6	4	4
2	24	8	1	2	2	1	1	1	2	1	1	2	2	2	3	3	3	3	2	2	3	2	1	0	1	1	0	0	0	0	0	0	0	1	0	3	0	1	0	1	6	5	6	6	5	5	5	4	4
2	20	7	1	2	1	4	1	2	1	1	2	2	2	6	3	3	3	3	3	3	3	3	0	0	0	0	0	0	0	0	0	0	0	2	0	3	0	1	1	0	5	6	6	5	5	5	#NULL!	4	4
2	35	2	2	4	1	2	1	6	2	1	6	6	2	6	3	2	3	3	3	3	3	3	0	0	0	0	0	0	0	0	0	0	0	2	0	1	1	0	1	1	#NULL!	5	6	#NULL!	#NULL!	5	#NULL!	4	2
1	21	8	1	2	2	4	1	2	2	1	6	2	4	6	3	3	3	3	3	2	3	2	1	0	0	0	0	0	0	0	0	0	0	2	1	3	0	1	0	0	5	5	6	#NULL!	5	3	#NULL!	4	4
1	31	6	2	4	1	2	1	3	1	1	6	6	4	6	4	2	1	3	2	2	3	2	0	0	0	0	0	0	0	0	0	0	0	2	1	2	1	0	1	1	4	6	6	#NULL!	#NULL!	3	#NULL!	5	2
1	19	8	1	2	2	4	1	1	1	1	6	1	4	6	3	4	4	3	3	2	3	2	1	0	0	0	0	0	0	0	0	0	0	2	1	3	0	1	0	0	6	6	6	#NULL!	6	3	#NULL!	4	5
1	19	8	1	4	3	4	1	3	1	1	6	1	4	6	4	4	4	4	3	3	4	3	0	0	0	0	0	0	0	0	0	0	0	2	1	3	0	0	0	0	4	6	6	#NULL!	6	3	#NULL!	5	5
1	24	8	1	2	2	1	1	1	1	1	1	1	1	6	3	3	2	2	2	2	2	2	0	0	0	0	0	0	0	0	0	0	0	2	1	3	0	1	0	1	6	6	6	6	6	6	#NULL!	4	4
1	19	7	1	4	1	4	1	4	1	1	6	3	1	5	3	3	4	3	2	3	3	3	0	0	0	0	0	0	0	0	0	0	0	1	1	3	0	0	1	0	3	6	6	#NULL!	4	6	2	4	4
2	29	3	2	4	1	3	1	1	1	1	6	1	2	6	2	3	3	2	3	3	3	3	0	0	0	0	0	0	0	0	0	0	0	2	0	1	1	0	1	0	6	6	6	#NULL!	6	5	#NULL!	2	4
1	33	5	2	2	2	1	1	4	2	2	3	2	5	6	3	3	3	3	3	3	3	3	0	0	0	0	0	0	0	0	0	0	0	1	1	2	1	1	0	1	3	5	5	4	5	2	#NULL!	4	4
1	32	3	2	4	2	1	1	1	1	1	1	2	5	6	2	3	3	4	3	4	4	4	0	0	0	0	0	0	0	0	0	0	0	1	1	1	1	0	0	1	6	6	6	6	5	2	#NULL!	2	4
1	27	5	1	4	3	1	1	2	1	1	6	6	4	6	4	4	4	4	3	3	3	3	0	0	0	0	0	0	0	0	0	0	0	2	1	2	0	0	0	1	5	6	6	#NULL!	#NULL!	3	#NULL!	5	5
2	28	7	1	1	2	1	1	1	1	1	6	5	2	6	4	4	4	4	4	4	4	4	0	0	0	0	0	0	0	0	0	0	0	1	0	3	0	1	0	1	6	6	6	#NULL!	2	5	#NULL!	5	5
1	18	6	1	4	1	4	1	1	1	1	6	3	3	6	4	4	4	3	3	3	3	3	0	0	0	0	0	0	0	0	0	0	0	2	1	2	0	0	1	0	6	6	6	#NULL!	4	4	#NULL!	5	5
2	26	4	2	1	2	3	1	1	1	1	6	1	1	6	3	3	3	3	3	3	3	3	0	0	0	0	0	0	0	0	0	0	0	1	0	2	1	1	0	0	6	6	6	#NULL!	6	6	#NULL!	4	4
2	26	3	2	4	1	1	1	6	1	1	6	6	1	6	3	3	3	3	3	2	3	3	0	0	0	0	0	0	0	0	0	0	0	1	0	1	1	0	1	1	#NULL!	6	6	#NULL!	#NULL!	6	#NULL!	4	4
2	34	4	2	4	1	3	1	3	1	1	6	4	4	6	4	2	2	2	1	1	1	1	0	0	0	0	0	0	0	0	0	0	0	2	0	2	1	0	1	0	4	6	6	#NULL!	3	3	#NULL!	5	2
2	33	8	2	2	1	3	1	1	1	1	1	1	1	6	4	4	4	4	4	4	4	4	1	0	0	0	0	0	0	0	0	0	0	1	0	3	1	1	1	0	6	6	6	6	6	6	#NULL!	5	5
1	34	3	2	4	1	3	1	1	1	1	6	6	4	6	2	3	3	3	2	2	2	2	0	0	0	0	0	0	0	0	0	0	0	2	1	1	1	0	1	0	6	6	6	#NULL!	#NULL!	3	#NULL!	2	4
2	18	5	1	4	1	4	1	2	2	1	6	1	3	6	4	4	4	4	3	3	4	3	1	0	0	0	0	0	0	0	0	0	0	2	0	2	0	0	1	0	5	5	6	#NULL!	6	4	#NULL!	5	5
1	34	3	4	4	3	1	1	5	1	1	6	6	2	6	3	3	3	3	3	2	2	3	0	0	0	0	0	0	0	0	0	0	0	1	1	1	0	0	0	1	2	6	6	#NULL!	#NULL!	5	#NULL!	4	4
2	25	3	2	4	1	1	1	1	1	1	6	6	3	6	3	4	4	3	2	2	3	2	0	0	0	0	0	0	0	0	0	0	0	2	0	1	1	0	1	1	6	6	6	#NULL!	#NULL!	4	#NULL!	4	5
2	35	5	2	4	1	1	1	1	1	4	1	6	4	6	2	1	2	2	3	1	2	1	0	0	0	0	0	0	0	0	0	0	0	2	0	2	1	0	1	1	6	6	3	6	#NULL!	3	#NULL!	2	1
1	22	7	1	2	1	4	1	1	1	1	2	1	4	6	4	4	4	4	4	4	4	4	0	0	0	0	0	0	0	0	0	0	0	1	1	3	0	1	1	0	6	6	6	5	6	3	#NULL!	5	5
2	21	8	1	1	1	4	1	3	1	1	6	1	4	5	3	3	4	3	2	2	3	1	0	0	0	0	0	0	0	0	0	0	0	2	0	3	0	1	1	0	4	6	6	#NULL!	6	3	2	4	4
2	22	9	1	2	2	1	1	2	1	1	3	2	1	4	4	4	4	4	4	4	4	4	0	0	0	0	0	0	0	0	0	0	0	2	0	3	0	1	0	1	5	6	6	4	5	6	3	5	5
1	20	7	1	2	1	4	1	1	1	1	6	2	5	6	3	3	3	3	3	3	3	2	1	0	0	0	0	0	0	0	0	0	0	2	1	3	0	1	1	0	6	6	6	#NULL!	5	2	#NULL!	4	4
2	24	5	2	2	1	3	1	2	1	2	6	2	4	6	3	1	4	3	3	1	1	1	0	0	0	0	0	0	0	0	0	0	0	2	0	2	1	1	1	0	5	6	5	#NULL!	5	3	#NULL!	4	1
2	28	3	2	4	3	1	1	1	1	3	6	3	3	6	2	2	1	2	3	2	1	2	0	0	0	0	0	0	0	0	0	0	0	2	0	1	1	0	0	1	6	6	4	#NULL!	4	4	#NULL!	2	2
2	19	7	1	2	1	4	1	2	1	1	6	2	3	6	3	3	3	3	3	3	3	3	1	0	0	0	0	0	0	0	0	0	0	2	0	3	0	1	1	0	5	6	6	#NULL!	5	4	#NULL!	4	4
2	35	3	2	4	3	1	1	5	1	1	6	1	3	6	3	3	3	3	3	3	3	3	0	0	0	0	0	0	0	0	0	0	0	1	0	1	1	0	0	1	2	6	6	#NULL!	6	4	#NULL!	4	4
2	32	4	1	4	2	1	1	2	2	2	2	2	2	2	3	3	2	2	2	2	2	2	0	0	0	0	0	0	0	0	0	0	0	2	0	2	0	0	0	1	5	5	5	5	5	5	5	4	4
2	35	3	2	4	1	3	1	5	1	1	3	2	2	6	4	3	3	3	3	3	3	3	0	0	0	0	0	0	0	0	0	0	0	2	0	1	1	0	1	0	2	6	6	4	5	5	#NULL!	5	4
2	29	4	2	4	1	3	1	5	2	1	6	2	2	6	4	3	3	3	3	3	3	3	0	0	0	0	0	0	0	0	0	0	0	1	0	2	1	0	1	0	2	5	6	#NULL!	5	5	#NULL!	5	4
1	35	2	2	4	1	3	1	3	1	1	6	6	4	6	3	1	4	3	3	1	3	1	0	0	0	0	0	0	0	0	0	0	0	2	1	1	1	0	1	0	4	6	6	#NULL!	#NULL!	3	#NULL!	4	1
2	24	5	1	2	3	1	1	4	1	2	1	3	1	6	3	2	1	3	3	2	2	2	0	0	0	0	0	0	0	0	0	1	0	2	0	2	0	1	0	1	3	6	5	6	4	6	#NULL!	4	2
2	34	3	2	4	1	1	1	4	1	2	2	6	3	6	3	3	3	3	3	3	2	3	0	0	0	0	0	0	0	0	0	0	0	2	0	1	1	0	1	1	3	6	5	5	#NULL!	4	#NULL!	4	4
1	33	8	2	4	1	1	1	3	3	3	3	3	3	3	4	4	4	4	4	4	4	4	0	0	0	0	0	0	0	0	0	0	0	1	1	3	1	0	1	1	4	4	4	4	4	4	4	5	5
2	28	8	2	4	1	1	1	3	1	1	6	1	4	5	3	3	3	3	3	3	3	3	0	0	0	0	0	0	0	0	1	0	0	1	0	3	1	0	1	1	4	6	6	#NULL!	6	3	2	4	4
2	35	3	2	4	1	1	1	6	2	2	6	6	2	6	3	3	3	3	3	3	3	3	0	0	0	0	0	0	0	0	0	0	0	1	0	1	1	0	1	1	#NULL!	5	5	#NULL!	#NULL!	5	#NULL!	4	4
1	24	4	1	4	1	3	1	2	2	2	2	2	2	6	1	3	3	3	2	2	2	1	0	0	0	0	0	0	0	0	1	0	0	1	1	2	0	0	1	0	5	5	5	5	5	5	#NULL!	1	4
1	26	8	1	4	2	1	1	1	2	1	1	3	2	2	4	3	3	3	3	3	3	2	1	0	1	0	0	0	0	0	0	0	0	2	1	3	0	0	0	1	6	5	6	6	4	5	5	5	4
2	22	3	2	4	1	3	1	5	3	1	5	5	2	6	4	2	2	3	2	2	3	2	1	0	0	0	0	0	0	0	0	0	0	2	0	1	1	0	1	0	2	4	6	2	2	5	#NULL!	5	2
1	32	8	2	4	1	1	1	1	1	1	1	1	1	1	3	2	3	3	4	3	4	3	0	0	0	0	0	0	0	0	1	0	0	1	1	3	1	0	1	1	6	6	6	6	6	6	6	4	2
2	25	8	1	1	1	1	1	1	1	1	6	5	2	5	3	3	3	3	3	3	3	3	0	0	0	0	0	0	0	0	0	0	0	1	0	3	0	1	1	1	6	6	6	#NULL!	2	5	2	4	4
2	35	3	2	4	1	1	1	4	3	1	1	4	3	6	3	3	3	3	3	3	3	3	0	0	0	0	0	0	0	0	0	0	0	2	0	1	1	0	1	1	3	4	6	6	3	4	#NULL!	4	4
1	34	9	2	1	2	1	1	1	1	1	1	1	1	1	4	3	3	2	2	2	3	2	0	0	1	0	0	1	0	0	0	0	0	2	1	3	1	1	0	1	6	6	6	6	6	6	6	5	4
1	28	5	2	4	1	1	1	1	1	1	6	6	2	6	4	4	4	3	4	4	4	4	0	0	0	0	0	0	0	0	0	0	0	2	1	2	1	0	1	1	6	6	6	#NULL!	#NULL!	5	#NULL!	5	5
2	30	7	2	4	1	3	1	1	1	5	6	6	2	6	4	3	3	3	2	2	2	2	0	0	0	0	0	0	0	0	0	0	0	2	0	3	1	0	1	0	6	6	2	#NULL!	#NULL!	5	#NULL!	5	4
2	18	8	1	2	1	4	1	1	1	1	6	1	4	6	3	3	3	3	3	3	3	3	1	0	0	0	0	0	0	0	1	0	0	2	0	3	0	1	1	0	6	6	6	#NULL!	6	3	#NULL!	4	4
1	35	5	2	4	3	1	1	1	1	1	1	1	1	1	-1	2	4	4	4	4	4	1	1	0	0	0	0	0	0	0	0	0	0	2	1	2	1	0	0	1	6	6	6	6	6	6	6	3	2
1	32	3	2	4	1	3	1	1	4	1	6	1	1	6	4	3	4	4	3	1	4	2	0	0	0	0	0	0	0	0	0	0	0	1	1	1	1	0	1	0	6	3	6	#NULL!	6	6	#NULL!	5	4
2	28	3	2	4	1	3	1	1	1	1	6	2	3	6	3	3	3	3	2	3	2	3	0	0	0	0	0	0	0	0	0	0	0	2	0	1	1	0	1	0	6	6	6	#NULL!	5	4	#NULL!	4	4
2	23	4	2	4	1	3	1	2	2	1	6	6	2	6	3	3	3	3	3	3	3	3	0	0	0	0	0	0	0	0	0	0	0	1	0	2	1	0	1	0	5	5	6	#NULL!	#NULL!	5	#NULL!	4	4
2	34	3	2	4	1	3	1	1	1	1	6	6	5	6	-1	3	2	2	2	2	-1	2	0	0	0	0	0	0	0	0	0	0	0	2	0	1	1	0	1	0	6	6	6	#NULL!	#NULL!	2	#NULL!	3	4
2	25	7	1	2	3	1	1	1	2	1	1	1	3	4	4	3	2	2	1	1	4	1	0	0	1	0	0	0	0	0	0	0	1	2	0	3	0	1	0	1	6	5	6	6	6	4	3	5	4
2	35	8	1	4	2	1	1	2	2	1	1	2	1	1	4	3	3	3	2	2	4	3	0	0	0	1	0	0	0	0	1	0	0	2	0	3	0	0	0	1	5	5	6	6	5	6	6	5	4
1	32	7	2	4	1	1	1	1	2	1	2	3	2	5	3	3	3	3	3	3	3	3	0	0	0	0	0	0	0	0	0	0	0	2	1	3	1	0	1	1	6	5	6	5	4	5	2	4	4
1	19	8	1	4	3	4	1	2	1	2	6	2	3	6	2	3	3	3	2	2	3	3	1	0	0	0	0	0	0	0	0	0	0	2	1	3	0	0	0	0	5	6	5	#NULL!	5	4	#NULL!	2	4
1	30	3	2	4	1	1	1	1	1	2	1	1	3	6	3	3	4	3	3	3	3	2	0	0	0	0	0	0	0	0	0	0	0	2	1	1	1	0	1	1	6	6	5	6	6	4	#NULL!	4	4
1	24	7	1	2	3	3	1	1	6	2	3	4	6	6	4	3	3	3	3	3	3	3	0	0	0	0	0	0	0	0	0	0	0	2	1	3	0	1	0	0	6	#NULL!	5	4	3	#NULL!	#NULL!	5	4
2	35	3	2	4	1	3	1	1	1	1	1	1	1	1	3	3	3	3	3	3	3	3	0	0	0	0	0	0	0	0	0	0	0	2	0	1	1	0	1	0	6	6	6	6	6	6	6	4	4
2	26	5	2	4	1	3	1	4	1	1	6	3	4	6	3	2	4	2	2	1	2	1	0	0	0	0	0	0	0	0	0	0	0	2	0	2	1	0	1	0	3	6	6	#NULL!	4	3	#NULL!	4	2
2	20	7	1	2	1	4	1	3	2	1	2	3	3	6	3	3	3	3	2	2	2	2	1	0	0	0	0	0	0	0	0	0	0	2	0	3	0	1	1	0	4	5	6	5	4	4	#NULL!	4	4
2	33	3	2	4	2	3	1	1	3	3	6	6	2	6	4	3	3	3	3	3	3	3	0	0	0	0	0	0	1	0	0	0	0	2	0	1	1	0	0	0	6	4	4	#NULL!	#NULL!	5	#NULL!	5	4
2	22	7	1	2	1	4	1	2	2	1	6	2	2	6	3	3	3	3	3	2	3	2	0	0	0	0	0	0	0	0	0	0	0	2	0	3	0	1	1	0	5	5	6	#NULL!	5	5	#NULL!	4	4
1	35	3	2	4	1	1	1	3	1	1	3	6	4	1	3	3	3	3	3	2	3	2	0	0	0	0	0	0	0	0	0	0	0	2	1	1	1	0	1	1	4	6	6	4	#NULL!	3	6	4	4
2	29	4	2	3	3	1	1	3	1	2	1	6	2	6	4	3	3	3	3	3	3	3	0	0	0	0	0	0	0	0	0	0	0	2	0	2	1	1	0	1	4	6	5	6	#NULL!	5	#NULL!	5	4
1	24	7	1	4	3	1	1	2	1	1	2	5	2	5	4	4	4	4	4	4	4	4	0	0	0	0	0	0	0	0	0	0	0	1	1	3	0	0	0	1	5	6	6	5	2	5	2	5	5
1	24	8	1	2	1	1	1	1	1	1	2	2	4	1	3	3	3	3	2	2	2	1	0	0	0	0	0	0	0	0	1	0	0	1	1	3	0	1	1	1	6	6	6	5	5	3	6	4	4
1	31	5	2	4	1	1	1	4	1	1	2	5	2	4	3	3	3	3	3	3	3	3	0	0	0	0	0	0	0	0	0	0	0	1	1	2	1	0	1	1	3	6	6	5	2	5	3	4	4
2	30	3	2	4	1	3	1	4	1	1	2	2	2	5	3	3	3	3	3	3	3	3	0	0	0	0	0	0	0	0	0	0	0	1	0	1	1	0	1	0	3	6	6	5	5	5	2	4	4
1	18	7	1	2	1	4	1	2	1	1	6	1	2	6	4	4	3	3	3	2	3	2	1	0	0	0	0	0	0	0	1	0	0	1	1	3	0	1	1	0	5	6	6	#NULL!	6	5	#NULL!	5	5
1	26	7	1	4	1	1	1	1	1	1	6	5	4	6	4	3	4	3	3	3	3	3	1	0	0	0	0	0	0	0	0	0	0	2	1	3	0	0	1	1	6	6	6	#NULL!	2	3	#NULL!	5	4
2	30	3	2	4	1	3	1	1	1	1	6	6	2	6	4	2	3	3	3	1	3	3	0	0	0	0	0	0	0	0	0	0	0	2	0	1	1	0	1	0	6	6	6	#NULL!	#NULL!	5	#NULL!	5	2
2	30	8	2	1	2	1	1	1	1	1	1	1	1	6	3	3	3	3	3	3	3	3	0	0	0	0	0	0	0	0	0	0	0	1	0	3	1	1	0	1	6	6	6	6	6	6	#NULL!	4	4
2	32	3	2	4	3	3	1	3	1	1	6	6	5	6	3	2	3	3	3	2	3	2	0	0	0	0	0	0	0	0	0	0	0	2	0	1	1	0	0	0	4	6	6	#NULL!	#NULL!	2	#NULL!	4	2
1	29	8	1	4	3	1	1	1	1	1	1	1	1	5	4	4	3	3	3	2	3	3	1	0	0	1	1	1	0	1	1	0	0	2	1	3	0	0	0	1	6	6	6	6	6	6	2	5	5
1	27	5	2	4	2	2	1	2	1	1	2	6	3	6	4	3	4	3	3	3	3	3	0	0	0	0	0	0	0	0	0	0	0	1	1	2	1	0	0	1	5	6	6	5	#NULL!	4	#NULL!	5	4
1	35	3	2	4	1	3	1	1	4	1	6	5	5	6	2	2	2	2	1	1	2	2	0	0	0	0	0	0	0	0	0	0	0	2	1	1	1	0	1	0	6	3	6	#NULL!	2	2	#NULL!	2	2
1	21	6	1	4	2	1	1	1	2	3	1	3	5	6	4	4	3	4	4	3	3	3	0	0	0	0	0	0	0	0	1	0	0	2	1	2	0	0	0	1	6	5	4	6	4	2	#NULL!	5	5
2	28	4	2	4	2	3	1	1	1	1	6	1	1	6	4	4	4	4	4	4	4	4	0	0	0	0	0	0	0	0	0	0	0	2	0	2	1	0	0	0	6	6	6	#NULL!	6	6	#NULL!	5	5
2	25	7	1	2	2	1	1	1	1	1	1	2	2	3	4	3	3	3	3	3	3	3	1	0	0	0	0	0	0	0	0	0	0	1	0	3	0	1	0	1	6	6	6	6	5	5	4	5	4
2	33	8	1	1	2	1	1	1	2	1	6	1	2	6	4	3	3	4	1	1	3	3	0	0	1	0	0	0	0	1	1	0	0	2	0	3	0	1	0	1	6	5	6	#NULL!	6	5	#NULL!	5	4
2	31	7	2	4	2	1	1	3	1	1	6	1	1	6	3	-1	-1	2	3	2	3	-1	0	0	0	0	0	0	0	0	1	0	0	1	0	3	1	0	0	1	4	6	6	#NULL!	6	6	#NULL!	4	3
1	33	8	1	4	2	1	1	1	2	1	2	2	2	3	4	4	4	4	4	4	4	4	0	0	0	0	0	0	0	0	0	0	0	2	1	3	0	0	0	1	6	5	6	5	5	5	4	5	5
2	34	7	2	4	2	1	1	1	1	1	1	1	1	6	4	4	4	4	4	2	4	2	0	0	0	0	0	0	0	0	0	0	0	2	0	3	1	0	0	1	6	6	6	6	6	6	#NULL!	5	5
1	26	8	2	4	2	1	1	2	2	2	6	5	4	6	2	3	4	1	1	1	2	2	0	0	0	0	0	0	0	0	0	0	0	2	1	3	1	0	0	1	5	5	5	#NULL!	2	3	#NULL!	2	4
2	32	8	1	4	2	1	1	1	1	1	2	1	2	6	4	3	3	3	3	3	3	3	0	0	0	0	0	0	0	0	0	0	0	2	0	3	0	0	0	1	6	6	6	5	6	5	#NULL!	5	4
1	28	3	2	2	1	3	1	1	2	1	6	6	2	6	4	3	4	4	3	3	3	3	0	0	0	0	0	0	0	1	0	0	0	1	1	1	1	1	1	0	6	5	6	#NULL!	#NULL!	5	#NULL!	5	4
2	32	3	2	4	1	3	1	3	2	1	6	6	6	6	3	2	2	3	3	2	2	2	0	0	0	0	0	0	0	0	0	0	0	2	0	1	1	0	1	0	4	5	6	#NULL!	#NULL!	#NULL!	#NULL!	4	2
2	33	8	1	2	2	1	1	3	1	2	1	1	4	6	4	4	2	4	3	2	3	3	0	0	0	0	0	0	0	0	0	0	0	2	0	3	0	1	0	1	4	6	5	6	6	3	#NULL!	5	5
1	34	8	1	4	2	1	1	4	4	3	2	3	3	6	2	2	2	1	2	1	2	2	0	0	0	0	0	0	0	0	0	0	0	2	1	3	0	0	0	1	3	3	4	5	4	4	#NULL!	2	2
2	34	3	1	4	2	1	1	2	1	1	6	6	6	6	3	4	3	3	3	3	3	3	0	0	0	0	0	0	0	0	0	0	0	2	0	1	0	0	0	1	5	6	6	#NULL!	#NULL!	#NULL!	#NULL!	4	5
2	32	8	2	4	2	1	1	1	1	1	1	1	2	6	4	4	4	4	4	4	4	4	0	0	0	0	0	0	0	0	0	0	0	2	0	3	1	0	0	1	6	6	6	6	6	5	#NULL!	5	5
2	32	8	2	2	2	1	1	1	1	1	1	3	2	6	4	4	4	4	4	3	4	4	1	0	0	0	0	0	0	0	0	0	0	2	0	3	1	1	0	1	6	6	6	6	4	5	#NULL!	5	5
2	19	8	1	4	1	4	1	2	1	1	4	1	3	5	3	3	3	3	3	3	3	3	1	0	0	0	0	0	0	0	0	0	0	1	0	3	0	0	1	0	5	6	6	3	6	4	2	4	4
1	35	6	2	4	1	3	1	3	1	2	6	6	6	6	3	2	-1	-1	-1	-1	-1	-1	0	0	0	0	0	0	0	0	0	0	0	2	1	2	1	0	1	0	4	6	5	#NULL!	#NULL!	#NULL!	#NULL!	4	2
1	31	3	2	4	1	3	1	1	4	2	6	6	6	6	4	3	3	3	3	3	3	3	0	0	0	0	0	0	0	0	0	0	0	2	1	1	1	0	1	0	6	3	5	#NULL!	#NULL!	#NULL!	#NULL!	5	4
1	26	7	1	4	2	1	1	4	3	2	2	6	4	6	2	2	2	3	3	2	2	2	0	0	0	0	0	0	0	0	0	0	0	2	1	3	0	0	0	1	3	4	5	5	#NULL!	3	#NULL!	2	2
2	28	7	1	4	2	1	1	1	1	1	2	6	4	6	3	3	3	3	3	3	3	3	0	0	0	0	0	0	0	0	0	0	0	2	0	3	0	0	0	1	6	6	6	5	#NULL!	3	#NULL!	4	4
1	29	8	1	4	3	1	1	2	2	1	2	4	1	4	3	3	3	3	3	3	3	3	1	1	0	0	0	0	0	0	0	0	0	2	1	3	0	0	0	1	5	5	6	5	3	6	3	4	4
1	31	7	2	4	2	1	1	3	1	1	6	4	5	6	4	3	4	4	3	3	3	3	0	0	0	0	0	0	0	0	0	0	0	1	1	3	1	0	0	1	4	6	6	#NULL!	3	2	#NULL!	5	4
1	32	4	2	4	2	1	1	3	1	1	6	6	4	6	4	3	4	3	3	3	3	3	0	0	0	0	0	0	0	0	0	0	0	2	1	2	1	0	0	1	4	6	6	#NULL!	#NULL!	3	#NULL!	5	4
1	21	8	1	2	3	4	1	1	1	1	1	1	1	1	3	3	3	3	3	3	3	3	0	0	0	0	0	0	0	0	0	0	0	2	1	3	0	1	0	0	6	6	6	6	6	6	6	4	4
1	26	4	1	4	3	1	1	3	3	3	6	3	3	6	3	2	2	2	2	2	2	2	0	0	0	0	0	0	0	0	0	0	0	2	1	2	0	0	0	1	4	4	4	#NULL!	4	4	#NULL!	4	2
1	23	8	1	4	3	4	1	2	2	2	6	2	2	6	3	3	3	3	3	3	3	3	0	0	0	0	0	0	0	0	0	0	0	2	1	3	0	0	0	0	5	5	5	#NULL!	5	5	#NULL!	4	4
2	26	7	2	4	2	3	1	5	1	1	6	6	2	6	3	3	3	3	3	3	3	3	0	0	0	0	0	0	0	0	0	0	0	2	0	3	1	0	0	0	2	6	6	#NULL!	#NULL!	5	#NULL!	4	4
2	34	8	1	4	2	1	1	1	1	1	1	2	3	4	3	3	3	3	2	1	3	3	0	0	0	0	0	0	0	0	1	0	0	2	0	3	0	0	0	1	6	6	6	6	5	4	3	4	4
2	34	3	2	4	1	1	1	2	2	3	6	2	4	6	1	2	2	3	3	2	2	2	0	0	1	0	0	0	0	0	0	0	0	2	0	1	1	0	1	1	5	5	4	#NULL!	5	3	#NULL!	1	2
2	25	5	2	4	2	1	1	2	2	2	2	3	2	2	3	3	3	3	3	3	3	3	0	0	0	0	0	0	0	0	0	0	0	2	0	2	1	0	0	1	5	5	5	5	4	5	5	4	4
1	33	9	2	4	1	1	1	1	1	1	6	1	1	6	3	3	3	3	3	3	3	3	0	0	0	0	0	0	0	0	0	0	0	2	1	3	1	0	1	1	6	6	6	#NULL!	6	6	#NULL!	4	4
1	35	3	2	4	1	1	1	3	1	1	1	3	2	6	3	3	3	3	3	3	3	3	1	0	0	0	0	0	0	0	0	0	0	2	1	1	1	0	1	1	4	6	6	6	4	5	#NULL!	4	4
1	31	4	2	4	2	1	1	1	2	1	1	2	2	5	2	2	2	3	3	3	2	3	0	1	0	0	0	1	0	0	0	0	0	2	1	2	1	0	0	1	6	5	6	6	5	5	2	2	2
2	28	8	2	2	1	3	1	1	1	3	3	3	1	3	3	3	3	3	3	3	3	3	1	0	0	0	1	0	0	0	0	0	1	2	0	3	1	1	1	0	6	6	4	4	4	6	4	4	4
2	24	8	1	2	2	1	1	2	1	1	1	3	4	4	3	2	3	3	2	2	2	2	1	0	0	0	1	0	0	0	1	0	0	2	0	3	0	1	0	1	5	6	6	6	4	3	3	4	2
1	34	4	2	4	1	1	1	1	1	1	6	6	3	6	3	3	3	2	2	3	-1	3	0	0	0	0	0	0	0	0	0	0	0	2	1	2	1	0	1	1	6	6	6	#NULL!	#NULL!	4	#NULL!	4	4
1	26	7	2	2	1	1	1	3	3	1	1	4	3	6	4	4	4	4	3	3	4	4	0	0	0	0	0	0	0	0	0	0	0	2	1	3	1	1	1	1	4	4	6	6	3	4	#NULL!	5	5
2	30	3	2	4	2	3	1	6	6	1	6	6	3	6	3	3	3	3	3	3	3	3	0	0	0	0	0	0	0	0	0	0	0	2	0	1	1	0	0	0	#NULL!	#NULL!	6	#NULL!	#NULL!	4	#NULL!	4	4
1	30	9	2	4	1	1	1	2	1	1	1	1	1	1	3	3	3	3	3	3	3	3	0	0	0	0	0	0	0	0	0	0	0	2	1	3	1	0	1	1	5	6	6	6	6	6	6	4	4
1	20	8	1	4	1	4	1	1	1	1	1	1	1	6	3	3	3	3	3	3	3	3	0	0	0	0	0	0	0	0	0	0	0	2	1	3	0	0	1	0	6	6	6	6	6	6	#NULL!	4	4
2	27	7	1	4	2	1	1	6	1	5	5	5	5	5	3	3	3	3	3	3	3	3	0	0	0	0	0	0	0	0	0	0	0	2	0	3	0	0	0	1	#NULL!	6	2	2	2	2	2	4	4
1	21	8	1	2	1	3	1	2	1	1	6	1	4	6	2	2	3	3	2	2	2	2	0	0	0	0	0	0	0	0	0	0	0	2	1	3	0	1	1	0	5	6	6	#NULL!	6	3	#NULL!	2	2
2	19	8	1	2	2	4	1	1	1	1	5	1	2	6	3	3	3	3	3	3	3	3	1	0	0	0	0	0	0	0	0	0	0	2	0	3	0	1	0	0	6	6	6	2	6	5	#NULL!	4	4
2	21	4	1	4	2	1	1	2	2	2	2	2	2	2	3	3	3	3	3	3	3	3	0	0	0	0	0	0	0	0	0	0	0	2	0	2	0	0	0	1	5	5	5	5	5	5	5	4	4
1	34	7	2	4	1	3	1	1	1	1	1	6	4	6	2	2	2	2	2	2	2	2	0	0	0	0	0	0	0	0	0	0	0	2	1	3	1	0	1	0	6	6	6	6	#NULL!	3	#NULL!	2	2
2	23	8	1	2	2	4	1	2	1	1	6	1	2	6	3	4	3	3	3	3	3	2	1	0	0	0	0	0	0	1	1	0	0	2	0	3	0	1	0	0	5	6	6	#NULL!	6	5	#NULL!	4	5
2	27	3	2	4	1	1	1	6	6	1	6	6	6	6	4	4	4	4	4	4	4	4	0	0	0	0	0	0	0	0	0	0	0	1	0	1	1	0	1	1	#NULL!	#NULL!	6	#NULL!	#NULL!	#NULL!	#NULL!	5	5
2	34	2	2	4	1	1	1	6	6	1	6	6	6	6	4	4	4	4	4	4	4	4	0	0	0	0	0	0	0	0	0	0	0	1	0	1	1	0	1	1	#NULL!	#NULL!	6	#NULL!	#NULL!	#NULL!	#NULL!	5	5
2	32	1	2	4	1	1	1	1	3	1	6	6	6	6	4	4	4	4	3	3	3	4	0	0	0	0	0	0	0	0	0	0	0	1	0	1	1	0	1	1	6	4	6	#NULL!	#NULL!	#NULL!	#NULL!	5	5
1	24	3	2	4	1	1	1	1	1	1	6	1	1	6	4	4	4	4	4	4	4	4	0	0	0	0	0	0	0	0	0	0	0	1	1	1	1	0	1	1	6	6	6	#NULL!	6	6	#NULL!	5	5
2	20	3	1	2	2	1	1	6	1	1	6	6	2	6	3	3	3	3	3	3	3	3	0	0	0	0	0	0	0	0	0	0	0	2	0	1	0	1	0	1	#NULL!	6	6	#NULL!	#NULL!	5	#NULL!	4	4
1	32	2	2	4	1	1	1	6	6	1	6	6	6	6	3	3	3	3	3	3	3	3	0	0	0	0	0	0	0	0	0	0	0	1	1	1	1	0	1	1	#NULL!	#NULL!	6	#NULL!	#NULL!	#NULL!	#NULL!	4	4
2	31	2	2	1	1	1	1	5	4	1	6	6	6	6	4	4	4	4	4	4	4	4	0	0	0	0	0	0	0	1	0	0	0	1	0	1	1	1	1	1	2	3	6	#NULL!	#NULL!	#NULL!	#NULL!	5	5
1	33	7	1	4	3	1	1	1	1	1	1	1	1	1	3	3	3	3	3	3	3	3	0	0	0	0	0	0	0	0	0	0	0	2	1	3	0	0	0	1	6	6	6	6	6	6	6	4	4
2	31	8	2	1	3	1	1	5	4	1	1	4	2	5	3	3	3	3	3	3	3	3	0	0	0	0	0	0	0	0	0	0	0	1	0	3	1	1	0	1	2	3	6	6	3	5	2	4	4
1	29	8	2	1	1	1	1	4	2	2	6	3	4	4	3	2	3	2	2	2	3	3	0	0	0	1	0	0	0	0	1	0	0	2	1	3	1	1	1	1	3	5	5	#NULL!	4	3	3	4	2
2	34	1	2	4	1	3	1	6	1	1	6	6	6	6	4	4	3	3	2	2	3	3	0	0	0	0	0	0	0	0	0	0	0	1	0	1	1	0	1	0	#NULL!	6	6	#NULL!	#NULL!	#NULL!	#NULL!	5	5
2	32	1	2	4	1	1	1	6	6	1	6	6	6	6	2	3	3	2	2	3	2	3	0	0	1	1	0	0	1	0	0	0	0	1	0	1	1	0	1	1	#NULL!	#NULL!	6	#NULL!	#NULL!	#NULL!	#NULL!	2	4
2	30	3	2	4	1	3	1	4	1	1	6	6	6	6	4	4	4	4	4	4	4	4	0	0	0	0	0	1	0	0	1	0	0	1	0	1	1	0	1	0	3	6	6	#NULL!	#NULL!	#NULL!	#NULL!	5	5
2	23	8	1	2	3	2	1	3	1	1	2	1	4	5	4	3	4	3	2	2	3	2	1	0	0	0	0	0	0	0	0	0	0	2	0	3	0	1	0	1	4	6	6	5	6	3	2	5	4
1	28	9	1	4	1	1	1	1	1	1	1	1	1	1	3	3	3	3	3	3	3	3	1	0	0	0	0	0	0	0	0	0	0	2	1	3	0	0	1	1	6	6	6	6	6	6	6	4	4
1	23	8	1	2	3	1	1	2	2	1	1	2	2	5	3	3	4	4	3	3	4	3	1	0	0	0	0	0	0	0	0	0	0	2	1	3	0	1	0	1	5	5	6	6	5	5	2	4	4
2	33	7	2	4	2	1	1	1	1	1	6	2	1	6	1	2	2	4	2	1	3	2	0	1	1	0	0	0	0	0	0	0	1	1	0	3	1	0	0	1	6	6	6	#NULL!	5	6	#NULL!	1	2
1	33	7	2	4	3	1	1	1	1	1	1	2	1	6	3	2	2	3	3	1	3	3	0	0	0	0	0	0	0	0	0	0	0	1	1	3	1	0	0	1	6	6	6	6	5	6	#NULL!	4	2
1	34	8	1	4	3	1	1	5	1	5	1	5	1	6	3	2	3	3	2	2	3	3	0	0	0	0	0	0	0	0	0	0	0	2	1	3	0	0	0	1	2	6	2	6	2	6	#NULL!	4	2
1	33	8	2	4	2	1	1	1	1	1	6	1	1	1	3	3	3	3	3	3	3	3	0	0	0	0	0	0	0	0	0	0	0	2	1	3	1	0	0	1	6	6	6	#NULL!	6	6	6	4	4
2	20	8	1	2	1	4	1	3	1	1	6	4	1	6	2	3	3	3	3	2	3	3	0	0	0	0	0	0	0	0	1	0	0	2	0	3	0	1	1	0	4	6	6	#NULL!	3	6	#NULL!	2	4
2	31	9	1	4	2	1	1	5	1	1	1	4	3	5	3	2	2	2	2	1	-1	3	0	0	0	0	0	0	0	0	0	0	0	2	0	3	0	0	0	1	2	6	6	6	3	4	2	4	2
2	19	8	1	2	1	4	1	1	1	1	1	1	1	1	4	4	4	4	4	4	4	4	0	0	0	0	0	0	0	0	0	0	0	2	0	3	0	1	1	0	6	6	6	6	6	6	6	5	5
1	21	8	1	2	2	4	1	5	1	1	6	4	4	6	3	3	3	3	2	2	2	2	0	0	0	0	0	0	0	0	0	0	0	2	1	3	0	1	0	0	2	6	6	#NULL!	3	3	#NULL!	4	4
1	21	8	1	2	2	4	1	1	1	1	2	1	3	3	4	3	3	3	2	2	2	2	0	0	0	0	0	0	0	0	0	0	0	2	1	3	0	1	0	0	6	6	6	5	6	4	4	5	4
1	34	4	1	4	2	1	1	1	1	1	1	3	4	6	3	3	3	3	2	2	2	2	0	0	0	0	0	0	0	0	0	0	0	2	1	2	0	0	0	1	6	6	6	6	4	3	#NULL!	4	4
2	22	8	1	2	1	2	1	1	1	1	1	2	2	3	3	3	3	3	3	3	4	2	0	0	0	0	0	0	0	0	0	0	0	2	0	3	0	1	1	1	6	6	6	6	5	5	4	4	4
1	19	8	1	2	2	4	1	1	1	1	1	1	1	6	4	3	3	3	3	2	2	2	1	0	0	0	0	0	0	0	1	0	0	2	1	3	0	1	0	0	6	6	6	6	6	6	#NULL!	5	4
1	26	7	1	2	2	1	1	2	1	5	3	1	1	1	3	3	3	3	3	3	3	3	0	0	0	0	0	0	0	0	0	0	0	2	1	3	0	1	0	1	5	6	2	4	6	6	6	4	4
2	28	8	2	1	2	1	1	1	1	1	2	2	2	6	4	4	3	4	2	2	3	2	1	0	1	0	0	1	0	0	0	0	0	1	0	3	1	1	0	1	6	6	6	5	5	5	#NULL!	5	5
2	34	9	2	1	2	1	1	1	2	3	1	2	1	1	1	3	2	2	3	1	3	3	0	0	0	0	0	0	0	0	0	0	0	2	0	3	1	1	0	1	6	5	4	6	5	6	6	1	4
1	24	8	1	2	3	1	1	1	1	1	6	1	2	2	3	3	3	3	3	2	3	2	0	0	0	0	0	0	0	0	1	0	0	2	1	3	0	1	0	1	6	6	6	#NULL!	6	5	5	4	4
1	25	7	6	1	1	1	1	1	3	1	1	2	5	1	4	3	4	1	3	3	3	3	0	0	0	0	0	0	0	0	0	0	0	2	1	3	1	1	1	1	6	4	6	6	5	2	6	5	4
1	27	7	2	4	3	1	1	4	2	1	1	4	3	4	4	2	2	3	1	1	3	3	0	0	0	0	0	0	0	0	0	0	0	2	1	3	1	0	0	1	3	5	6	6	3	4	3	5	2
2	23	8	1	2	1	4	1	3	1	1	2	2	2	6	3	3	3	3	3	3	3	3	1	0	0	0	0	0	0	0	0	0	0	2	0	3	0	1	1	0	4	6	6	5	5	5	#NULL!	4	4
1	28	8	2	4	2	1	1	2	1	1	6	2	3	1	3	2	2	2	2	1	4	3	0	0	0	0	0	0	0	0	0	0	0	2	1	3	1	0	0	1	5	6	6	#NULL!	5	4	6	4	2
2	35	9	2	1	2	1	1	1	1	1	1	1	1	6	3	4	4	3	3	2	3	3	1	0	0	0	0	0	0	0	1	0	0	2	0	3	1	1	0	1	6	6	6	6	6	6	#NULL!	4	5
2	26	9	2	2	3	3	1	3	4	1	6	2	3	4	4	4	4	3	3	2	3	3	0	0	0	0	0	0	0	0	0	0	0	1	0	3	1	1	0	0	4	3	6	#NULL!	5	4	3	5	5
1	30	9	1	4	3	1	1	1	1	1	1	1	1	1	4	3	2	2	2	1	3	2	0	0	0	0	0	0	0	0	0	0	0	1	1	3	0	0	0	1	6	6	6	6	6	6	6	5	4
1	32	9	1	2	2	1	1	2	2	2	2	2	2	2	2	3	3	3	3	2	3	3	0	0	0	0	0	0	0	0	0	0	0	2	1	3	0	1	0	1	5	5	5	5	5	5	5	2	4
1	28	7	1	2	3	1	1	1	1	1	1	3	3	6	3	3	3	3	3	3	3	3	0	0	0	0	0	0	0	0	0	0	0	2	1	3	0	1	0	1	6	6	6	6	4	4	#NULL!	4	4
2	34	7	1	4	1	1	1	1	1	1	1	6	1	6	4	4	4	3	3	3	3	3	0	0	0	0	0	0	0	0	0	0	0	2	0	3	0	0	1	1	6	6	6	6	#NULL!	6	#NULL!	5	5
1	25	8	1	2	3	1	1	1	1	2	2	4	1	6	4	3	3	3	3	3	3	3	0	0	0	0	0	0	0	0	0	0	0	2	1	3	0	1	0	1	6	6	5	5	3	6	#NULL!	5	4
1	30	8	2	1	1	1	1	1	1	1	1	3	4	3	4	4	3	3	3	2	3	3	1	0	0	0	0	0	0	0	0	0	0	2	1	3	1	1	1	1	6	6	6	6	4	3	4	5	5
2	21	8	1	4	2	4	1	2	1	1	5	1	3	6	4	3	3	3	2	2	3	3	0	0	0	0	0	0	0	0	0	0	0	1	0	3	0	0	0	0	5	6	6	2	6	4	#NULL!	5	4
1	32	5	1	4	1	1	1	2	2	4	6	6	4	6	4	3	2	4	3	1	3	1	0	0	0	0	0	0	0	0	0	0	0	2	1	2	0	0	1	1	5	5	3	#NULL!	#NULL!	3	#NULL!	5	4
2	30	8	1	4	2	1	1	3	1	1	4	4	2	5	3	1	2	3	3	2	2	2	0	0	0	0	0	0	0	0	0	0	0	2	0	3	0	0	0	1	4	6	6	3	3	5	2	4	1
2	26	4	1	4	1	1	1	3	2	2	1	5	2	3	3	2	3	3	3	3	3	3	0	0	0	0	0	0	0	0	0	0	0	2	0	2	0	0	1	1	4	5	5	6	2	5	4	4	2
1	25	5	1	4	2	1	1	2	1	1	1	1	1	4	4	3	3	3	3	3	3	3	0	0	0	0	0	0	0	0	0	0	0	2	1	2	0	0	0	1	5	6	6	6	6	6	3	5	4
2	24	7	1	1	1	1	1	3	2	1	1	2	3	3	4	4	4	4	4	4	4	4	1	0	0	0	0	0	0	0	0	0	0	2	0	3	0	1	1	1	4	5	6	6	5	4	4	5	5
1	25	8	1	2	3	1	1	3	1	1	6	2	2	6	3	1	3	3	3	3	3	3	1	0	0	0	0	0	0	0	0	0	0	1	1	3	0	1	0	1	4	6	6	#NULL!	5	5	#NULL!	4	1
1	23	8	1	2	1	3	1	1	1	1	1	1	1	1	2	3	3	3	2	2	3	2	1	0	0	0	0	0	0	0	0	0	0	2	1	3	0	1	1	0	6	6	6	6	6	6	6	2	4
1	30	8	1	4	3	1	1	1	1	1	1	6	2	6	2	2	2	3	3	2	3	3	0	0	0	0	0	0	0	0	0	0	0	1	1	3	0	0	0	1	6	6	6	6	#NULL!	5	#NULL!	2	2
2	31	8	2	1	2	1	1	5	3	1	1	2	1	3	3	3	3	3	3	3	3	3	0	0	0	0	0	0	0	0	0	0	0	1	0	3	1	1	0	1	2	4	6	6	5	6	4	4	4
2	33	7	2	4	1	1	1	2	2	2	2	3	2	6	3	3	3	3	3	3	3	3	0	0	0	0	0	0	0	0	0	0	0	2	0	3	1	0	1	1	5	5	5	5	4	5	#NULL!	4	4
1	30	3	2	4	2	1	1	6	6	6	2	6	6	1	3	2	2	2	2	1	2	1	0	0	0	0	0	0	0	0	0	0	0	2	1	1	1	0	0	1	#NULL!	#NULL!	#NULL!	5	#NULL!	#NULL!	6	4	2
2	21	8	1	2	1	4	1	2	1	1	6	3	2	4	3	3	3	3	3	3	3	3	0	0	0	0	0	0	0	0	0	0	0	1	0	3	0	1	1	0	5	6	6	#NULL!	4	5	3	4	4
1	34	3	2	4	3	1	1	3	2	1	6	6	2	6	-1	-1	-1	-1	2	-1	-1	-1	0	0	0	0	0	0	0	0	1	0	0	2	1	1	1	0	0	1	4	5	6	#NULL!	#NULL!	5	#NULL!	3	3
2	31	9	2	1	3	1	1	1	1	1	6	1	1	2	2	2	3	2	1	1	1	2	1	0	0	0	0	0	0	0	1	0	0	1	0	3	1	1	0	1	6	6	6	#NULL!	6	6	5	2	2
2	32	7	2	4	3	1	1	1	1	1	1	1	3	6	4	3	3	3	2	2	3	3	0	0	0	0	0	0	0	0	0	0	0	1	0	3	1	0	0	1	6	6	6	6	6	4	#NULL!	5	4
2	33	2	2	4	1	2	1	5	1	1	6	6	2	6	3	-1	-1	3	-1	-1	-1	-1	0	0	0	0	0	0	0	0	0	0	0	2	0	1	1	0	1	1	2	6	6	#NULL!	#NULL!	5	#NULL!	4	3
1	27	7	1	4	2	1	1	3	1	1	1	5	4	1	4	3	2	3	2	2	3	2	0	0	0	0	0	0	0	0	0	0	1	2	1	3	0	0	0	1	4	6	6	6	2	3	6	5	4
2	30	5	2	2	1	1	1	6	1	1	1	6	4	6	3	3	3	2	3	3	3	3	0	0	0	0	0	0	0	0	0	0	0	2	0	2	1	1	1	1	#NULL!	6	6	6	#NULL!	3	#NULL!	4	4
2	32	3	2	4	3	3	1	1	1	1	6	3	2	6	3	4	4	3	3	3	4	4	0	0	0	0	0	0	0	0	0	0	0	2	0	1	1	0	0	0	6	6	6	#NULL!	4	5	#NULL!	4	5
1	33	3	1	4	2	3	1	1	3	1	6	6	2	6	3	3	3	3	3	3	3	3	0	0	0	0	0	0	0	0	0	0	0	1	1	1	0	0	0	0	6	4	6	#NULL!	#NULL!	5	#NULL!	4	4
2	34	3	4	4	1	2	1	1	1	1	6	6	1	1	4	3	2	3	2	2	2	3	0	0	0	0	0	0	0	0	0	0	0	2	0	1	0	0	1	1	6	6	6	#NULL!	#NULL!	6	6	5	4
1	25	4	1	2	3	1	1	3	1	1	1	3	1	5	4	4	4	3	3	3	3	3	1	0	0	0	0	0	0	0	1	1	0	2	1	2	0	1	0	1	4	6	6	6	4	6	2	5	5
1	19	6	1	4	3	1	1	1	1	1	1	4	4	6	3	2	3	3	3	3	3	3	0	0	0	0	0	0	0	0	0	0	0	1	1	2	0	0	0	1	6	6	6	6	3	3	#NULL!	4	2
1	28	4	2	4	1	1	1	1	2	2	2	2	2	2	4	2	2	3	3	3	2	2	1	0	0	0	0	0	0	0	0	0	0	2	1	2	1	0	1	1	6	5	5	5	5	5	5	5	2
1	34	7	2	4	1	1	1	2	1	1	2	3	4	6	3	2	2	2	2	1	2	2	1	0	0	0	0	0	0	0	0	0	0	1	1	3	1	0	1	1	5	6	6	5	4	3	#NULL!	4	2
2	23	7	1	2	1	1	1	4	1	1	1	3	3	5	3	3	3	2	2	2	2	2	1	0	0	0	0	0	0	0	0	0	0	2	0	3	0	1	1	1	3	6	6	6	4	4	2	4	4
1	33	3	2	4	1	1	1	3	1	1	1	3	6	6	3	3	3	2	2	2	2	2	0	0	0	0	0	0	0	0	0	0	0	2	1	1	1	0	1	1	4	6	6	6	4	#NULL!	#NULL!	4	4
2	27	5	1	2	2	2	1	1	1	1	1	1	1	2	3	2	3	3	3	3	3	3	0	0	0	0	0	0	0	0	0	0	0	2	0	2	0	1	0	1	6	6	6	6	6	6	5	4	2
2	34	7	2	4	3	1	1	1	1	1	1	1	1	5	3	3	3	3	3	3	3	3	0	0	0	0	0	0	0	0	0	0	0	2	0	3	1	0	0	1	6	6	6	6	6	6	2	4	4
2	32	3	2	4	1	3	1	5	1	1	2	1	6	6	4	3	3	3	3	3	3	3	0	0	0	0	0	0	0	0	0	0	0	1	0	1	1	0	1	0	2	6	6	5	6	#NULL!	#NULL!	5	4
2	31	3	2	4	3	2	1	3	2	1	1	2	4	6	3	3	3	3	3	3	3	3	0	0	0	0	0	0	0	0	0	0	0	1	0	1	1	0	0	1	4	5	6	6	5	3	#NULL!	4	4
1	26	8	1	2	3	2	1	4	3	3	6	4	3	4	3	3	3	3	3	2	3	2	0	0	0	0	0	0	0	0	0	0	0	2	1	3	0	1	0	1	3	4	4	#NULL!	3	4	3	4	4
2	34	3	2	4	3	3	1	6	6	2	6	3	5	6	3	3	3	3	3	3	1	1	0	0	0	0	0	0	0	0	0	0	0	1	0	1	1	0	0	0	#NULL!	#NULL!	5	#NULL!	4	2	#NULL!	4	4
1	34	3	2	4	1	3	1	1	6	3	6	6	4	6	4	3	3	3	2	2	3	2	0	0	0	0	0	0	0	0	0	0	0	2	1	1	1	0	1	0	6	#NULL!	4	#NULL!	#NULL!	3	#NULL!	5	4
1	35	5	2	4	3	3	1	1	1	3	6	6	4	6	3	3	3	3	3	3	3	3	0	0	0	0	0	0	0	0	0	0	0	1	1	2	1	0	0	0	6	6	4	#NULL!	#NULL!	3	#NULL!	4	4
2	33	8	2	2	2	3	1	1	1	1	1	1	1	1	3	3	3	3	3	3	3	3	1	0	0	0	0	0	0	0	0	0	0	2	0	3	1	1	0	0	6	6	6	6	6	6	6	4	4
1	32	6	2	4	1	1	1	5	1	2	1	4	4	6	3	3	3	-1	3	3	3	3	0	0	0	0	0	0	0	0	0	0	0	2	1	2	1	0	1	1	2	6	5	6	3	3	#NULL!	4	4
2	34	7	2	4	1	1	1	4	2	1	1	2	2	4	3	3	2	2	3	1	2	2	1	1	1	0	0	0	0	0	0	0	1	1	0	3	1	0	1	1	3	5	6	6	5	5	3	4	4
1	23	8	1	2	1	1	1	2	2	1	2	2	2	2	4	4	4	4	3	3	3	3	1	0	0	0	0	0	0	0	1	0	0	1	1	3	0	1	1	1	5	5	6	5	5	5	5	5	5
2	28	7	2	4	1	3	1	6	2	2	2	3	2	4	3	3	4	3	2	2	3	2	0	0	0	0	0	0	0	0	0	0	0	2	0	3	1	0	1	0	#NULL!	5	5	5	4	5	3	4	4
2	33	7	2	4	1	1	1	4	1	3	1	3	4	4	3	3	3	2	3	2	2	1	0	0	0	0	0	0	0	0	0	0	0	1	0	3	1	0	1	1	3	6	4	6	4	3	3	4	4
1	29	4	2	4	1	1	1	5	4	1	1	5	4	6	3	3	3	3	3	3	3	3	0	0	0	0	0	0	0	0	0	0	0	2	1	2	1	0	1	1	2	3	6	6	2	3	#NULL!	4	4
2	34	7	1	1	2	1	1	1	1	1	1	1	2	6	3	3	3	3	3	3	3	3	0	0	0	0	0	0	0	0	1	0	0	1	0	3	0	1	0	1	6	6	6	6	6	5	#NULL!	4	4
2	30	7	2	4	1	1	1	1	1	1	1	1	1	1	3	2	3	3	2	2	2	2	1	0	0	0	0	0	0	0	0	0	0	2	0	3	1	0	1	1	6	6	6	6	6	6	6	4	2
1	24	5	1	2	3	1	1	1	1	1	6	5	3	6	4	3	3	3	3	2	3	2	1	0	0	0	0	0	0	0	0	0	0	1	1	2	0	1	0	1	6	6	6	#NULL!	2	4	#NULL!	5	4
1	26	4	2	4	1	1	1	1	2	2	2	6	2	2	3	3	3	3	3	3	3	3	0	0	0	0	0	0	0	0	0	0	0	2	1	2	1	0	1	1	6	5	5	5	#NULL!	5	5	4	4
2	24	9	1	2	1	4	1	1	1	1	3	1	4	6	3	3	3	3	2	2	3	2	0	0	0	0	0	0	0	0	0	0	0	2	0	3	0	1	1	0	6	6	6	4	6	3	#NULL!	4	4
2	28	8	2	2	3	3	1	6	1	1	5	5	1	6	3	2	2	3	3	3	3	3	0	0	0	0	0	0	0	0	0	0	0	2	0	3	1	1	0	0	#NULL!	6	6	2	2	6	#NULL!	4	2
2	34	3	2	4	1	2	1	3	2	1	1	5	4	6	3	2	2	3	2	2	3	2	0	0	0	0	0	0	0	0	0	0	0	2	0	1	1	0	1	1	4	5	6	6	2	3	#NULL!	4	2
2	30	7	2	4	1	3	1	4	1	4	6	1	1	6	4	3	2	3	3	3	3	3	0	0	0	0	0	0	0	0	0	0	0	2	0	3	1	0	1	0	3	6	3	#NULL!	6	6	#NULL!	5	4
1	31	3	2	4	1	1	1	1	3	1	6	1	4	6	3	3	4	4	2	2	3	2	0	0	0	0	0	0	0	0	0	0	0	1	1	1	1	0	1	1	6	4	6	#NULL!	6	3	#NULL!	4	4
2	18	3	1	4	1	4	1	2	2	2	6	6	2	6	4	4	4	4	4	4	4	4	1	1	0	0	0	0	0	0	0	0	0	2	0	1	0	0	1	0	5	5	5	#NULL!	#NULL!	5	#NULL!	5	5
2	21	8	1	2	2	4	1	3	2	1	6	1	4	6	4	3	3	3	3	3	3	3	1	0	0	0	0	0	0	0	0	0	0	2	0	3	0	1	0	0	4	5	6	#NULL!	6	3	#NULL!	5	4
2	19	7	1	4	1	4	1	5	2	2	6	3	3	6	4	4	4	3	3	2	4	4	0	0	0	0	0	0	0	0	0	0	0	2	0	3	0	0	1	0	2	5	5	#NULL!	4	4	#NULL!	5	5
2	27	2	2	4	1	1	1	6	4	1	6	6	5	6	3	3	3	3	3	3	3	3	0	0	0	0	0	0	0	0	0	1	0	2	0	1	1	0	1	1	#NULL!	3	6	#NULL!	#NULL!	2	#NULL!	4	4
1	19	8	1	2	3	4	1	5	1	1	6	3	2	6	3	2	3	3	3	3	3	2	0	0	0	0	0	0	0	0	0	0	0	2	1	3	0	1	0	0	2	6	6	#NULL!	4	5	#NULL!	4	2
2	27	4	2	4	1	1	1	1	1	1	6	6	2	6	3	3	3	3	3	3	3	3	0	0	0	0	0	0	0	0	0	0	0	1	0	2	1	0	1	1	6	6	6	#NULL!	#NULL!	5	#NULL!	4	4
2	33	1	2	4	1	1	1	6	6	1	6	6	6	6	3	3	3	3	3	3	3	3	0	0	0	0	0	0	0	0	0	0	0	2	0	1	1	0	1	1	#NULL!	#NULL!	6	#NULL!	#NULL!	#NULL!	#NULL!	4	4
1	32	7	2	4	2	1	1	1	2	1	3	4	2	6	3	2	2	2	2	3	2	3	1	0	0	0	1	0	0	0	1	1	0	2	1	3	1	0	0	1	6	5	6	4	3	5	#NULL!	4	2
1	19	4	1	4	3	4	1	3	1	1	6	6	3	6	3	3	3	3	2	2	3	2	0	0	1	0	0	0	0	0	0	0	0	2	1	2	0	0	0	0	4	6	6	#NULL!	#NULL!	4	#NULL!	4	4
1	27	3	1	4	1	1	1	5	4	6	6	6	2	6	1	1	1	1	4	1	1	1	0	0	1	0	0	0	0	0	0	0	0	2	1	1	0	0	1	1	2	3	#NULL!	#NULL!	#NULL!	5	#NULL!	1	1
2	18	6	1	4	1	4	1	6	1	6	6	6	6	6	3	3	3	3	3	3	3	3	0	0	0	0	0	0	0	0	0	0	1	2	0	2	0	0	1	0	#NULL!	6	#NULL!	#NULL!	#NULL!	#NULL!	#NULL!	4	4
2	26	3	2	4	1	3	1	1	1	1	6	6	4	6	3	3	3	3	3	3	3	3	0	0	0	0	0	0	0	0	0	0	0	1	0	1	1	0	1	0	6	6	6	#NULL!	#NULL!	3	#NULL!	4	4
2	27	7	2	4	1	1	1	1	1	1	4	6	2	6	4	4	4	3	4	3	2	3	0	0	0	1	0	0	0	0	1	0	0	2	0	3	1	0	1	1	6	6	6	3	#NULL!	5	#NULL!	5	5
1	20	8	1	2	3	4	1	3	1	1	6	2	3	6	3	3	3	3	2	3	3	3	1	0	0	0	0	0	0	0	0	0	0	2	1	3	0	1	0	0	4	6	6	#NULL!	5	4	#NULL!	4	4
2	21	8	1	2	1	4	1	1	1	1	6	2	3	6	4	4	4	4	3	2	3	3	1	0	0	0	0	0	0	0	0	0	0	2	0	3	0	1	1	0	6	6	6	#NULL!	5	4	#NULL!	5	5
2	26	7	2	4	1	3	1	5	3	2	6	3	5	6	3	3	1	2	3	3	2	2	0	0	0	0	0	0	0	0	0	0	1	2	0	3	1	0	1	0	2	4	5	#NULL!	4	2	#NULL!	4	4
2	19	4	1	2	1	4	1	2	2	1	6	2	4	6	3	3	3	3	2	2	3	3	1	0	0	0	0	0	0	0	0	0	0	2	0	2	0	1	1	0	5	5	6	#NULL!	5	3	#NULL!	4	4
2	29	3	2	4	1	3	1	5	4	5	4	1	3	6	4	3	3	3	2	2	3	2	0	0	1	0	0	0	0	1	0	0	0	2	0	1	1	0	1	0	2	3	2	3	6	4	#NULL!	5	4
1	34	2	2	4	1	1	1	3	2	1	6	6	4	6	3	3	3	3	2	2	3	3	0	0	0	0	0	0	0	0	0	0	0	1	1	1	1	0	1	1	4	5	6	#NULL!	#NULL!	3	#NULL!	4	4
2	31	3	2	4	1	1	1	3	1	1	6	6	4	6	3	3	3	3	3	3	3	3	0	0	0	0	0	0	0	0	0	0	0	2	0	1	1	0	1	1	4	6	6	#NULL!	#NULL!	3	#NULL!	4	4
1	23	8	1	2	1	3	1	1	2	1	4	1	4	6	3	3	3	2	2	2	2	2	0	1	1	0	0	0	0	0	0	0	0	2	1	3	0	1	1	0	6	5	6	3	6	3	#NULL!	4	4
1	19	4	1	4	1	4	1	3	2	2	2	1	2	6	3	3	3	3	2	2	2	2	0	0	0	0	0	0	0	0	0	0	0	1	1	2	0	0	1	0	4	5	5	5	6	5	#NULL!	4	4
2	34	3	2	4	1	1	1	3	1	1	6	6	2	6	3	2	2	3	3	3	3	1	0	0	0	0	0	0	0	0	0	0	0	2	0	1	1	0	1	1	4	6	6	#NULL!	#NULL!	5	#NULL!	4	2
2	33	3	2	4	1	3	1	6	1	1	6	6	1	6	-1	-1	-1	3	3	-1	-1	-1	0	0	0	0	0	0	0	0	0	0	0	2	0	1	1	0	1	0	#NULL!	6	6	#NULL!	#NULL!	6	#NULL!	3	3
1	21	8	1	4	1	4	1	5	2	2	6	2	4	6	4	3	3	3	3	2	3	2	1	0	0	0	0	0	0	0	0	0	0	2	1	3	0	0	1	0	2	5	5	#NULL!	5	3	#NULL!	5	4
2	25	3	2	4	1	1	1	2	2	1	6	6	4	6	4	4	4	4	4	4	4	4	0	0	0	0	0	0	0	0	0	0	0	2	0	1	1	0	1	1	5	5	6	#NULL!	#NULL!	3	#NULL!	5	5
2	22	8	1	2	2	4	1	1	1	1	6	1	2	6	4	3	4	4	3	3	3	3	0	0	0	0	0	0	0	0	0	0	0	2	0	3	0	1	0	0	6	6	6	#NULL!	6	5	#NULL!	5	4
2	32	3	2	4	1	3	1	2	1	2	6	3	2	6	-1	-1	-1	-1	-1	-1	-1	-1	0	0	0	0	0	0	0	0	0	0	0	2	0	1	1	0	1	0	5	6	5	#NULL!	4	5	#NULL!	3	3
2	33	3	2	4	3	3	1	3	1	6	6	1	3	6	3	3	3	3	3	4	4	4	0	0	0	0	0	0	0	0	0	0	0	2	0	1	1	0	0	0	4	6	#NULL!	#NULL!	6	4	#NULL!	4	4
1	30	8	1	4	2	2	1	1	1	1	6	2	2	4	3	2	2	2	3	3	3	3	0	0	0	0	0	0	0	0	0	0	0	2	1	3	0	0	0	1	6	6	6	#NULL!	5	5	3	4	2
1	20	7	1	4	2	4	1	1	1	1	6	1	1	6	4	4	4	4	4	4	4	3	0	0	0	0	0	0	0	0	0	0	0	2	1	3	0	0	0	0	6	6	6	#NULL!	6	6	#NULL!	5	5
2	29	3	2	4	1	3	1	3	3	3	3	3	3	3	3	3	3	3	3	3	3	3	0	0	0	0	0	0	0	0	0	0	0	2	0	1	1	0	1	0	4	4	4	4	4	4	4	4	4
2	22	8	1	2	1	4	1	1	1	1	6	3	3	6	3	3	3	3	3	3	3	3	1	0	0	0	0	0	0	0	0	0	0	1	0	3	0	1	1	0	6	6	6	#NULL!	4	4	#NULL!	4	4
2	33	8	2	1	2	1	1	4	1	1	6	2	4	6	3	3	3	3	3	2	3	2	1	0	0	0	1	0	0	0	0	0	0	2	0	3	1	1	0	1	3	6	6	#NULL!	5	3	#NULL!	4	4
2	24	8	1	4	1	2	1	1	2	1	2	2	3	6	3	2	3	2	2	3	2	2	0	0	0	0	0	0	0	0	0	0	0	2	0	3	0	0	1	1	6	5	6	5	5	4	#NULL!	4	2
2	27	8	1	4	1	1	1	1	1	1	1	4	1	6	3	3	3	3	3	3	3	3	0	0	0	0	0	0	0	0	0	0	0	2	0	3	0	0	1	1	6	6	6	6	3	6	#NULL!	4	4
2	33	6	1	4	1	3	1	2	6	6	6	6	6	6	3	3	3	3	3	3	3	3	0	0	0	0	0	0	0	0	0	0	0	2	0	2	0	0	1	0	5	#NULL!	#NULL!	#NULL!	#NULL!	#NULL!	#NULL!	4	4
1	30	4	1	4	1	1	1	1	1	2	3	2	3	6	3	3	3	3	3	2	3	2	1	0	0	0	0	0	0	1	0	0	0	1	1	2	0	0	1	1	6	6	5	4	5	4	#NULL!	4	4
2	27	8	1	4	3	1	1	3	1	1	1	5	2	1	4	3	3	3	2	2	2	2	1	0	0	0	0	0	0	0	0	0	0	1	0	3	0	0	0	1	4	6	6	6	2	5	6	5	4
1	18	7	1	4	1	4	1	6	1	1	6	4	2	6	4	4	4	4	4	4	4	4	0	0	0	0	0	0	0	0	0	0	0	2	1	3	0	0	1	0	#NULL!	6	6	#NULL!	3	5	#NULL!	5	5
2	20	8	1	2	1	4	1	1	1	1	6	6	1	5	4	4	4	4	3	3	3	3	1	0	0	0	0	0	0	0	0	0	0	2	0	3	0	1	1	0	6	6	6	#NULL!	#NULL!	6	2	5	5
1	22	7	1	2	1	4	1	1	1	1	6	6	4	6	4	4	4	4	4	4	4	2	0	0	0	0	0	0	0	0	0	0	0	2	1	3	0	1	1	0	6	6	6	#NULL!	#NULL!	3	#NULL!	5	5
1	29	4	1	4	1	1	1	1	1	1	6	6	2	6	3	3	3	3	3	3	3	3	0	0	0	0	0	0	0	0	0	0	0	2	1	2	0	0	1	1	6	6	6	#NULL!	#NULL!	5	#NULL!	4	4
1	32	7	4	4	1	3	1	1	1	1	6	6	6	6	2	3	3	3	3	3	3	2	1	1	0	0	0	0	0	0	0	0	0	1	1	3	0	0	1	0	6	6	6	#NULL!	#NULL!	#NULL!	#NULL!	2	4
2	21	8	1	2	1	4	1	2	1	1	1	3	3	6	4	3	3	4	3	2	3	2	1	1	0	0	1	0	0	0	1	0	0	2	0	3	0	1	1	0	5	6	6	6	4	4	#NULL!	5	4
2	23	3	3	4	3	3	1	1	1	1	6	1	1	6	3	2	3	3	2	1	3	2	0	0	0	0	0	0	0	0	0	0	0	2	0	1	1	0	0	0	6	6	6	#NULL!	6	6	#NULL!	4	2
1	30	7	2	4	3	1	1	5	2	1	5	5	2	4	3	2	2	3	3	2	3	3	0	0	0	0	0	0	0	0	0	0	0	1	1	3	1	0	0	1	2	5	6	2	2	5	3	4	2
2	35	3	2	4	3	3	1	1	1	1	6	6	3	5	3	3	3	3	1	3	3	3	0	0	0	0	0	0	0	0	0	0	0	2	0	1	1	0	0	0	6	6	6	#NULL!	#NULL!	4	2	4	4
2	34	8	1	4	3	1	1	1	2	3	1	2	3	4	3	3	3	3	3	3	3	3	0	0	0	0	0	0	0	0	0	0	0	1	0	3	0	0	0	1	6	5	4	6	5	4	3	4	4
2	31	3	2	4	1	3	1	4	1	1	6	6	6	6	3	3	3	3	3	3	2	3	0	0	0	0	0	0	0	0	0	0	0	1	0	1	1	0	1	0	3	6	6	#NULL!	#NULL!	#NULL!	#NULL!	4	4
2	21	8	1	2	3	4	1	2	1	1	6	1	3	6	3	3	3	3	3	3	2	3	1	0	0	0	0	0	0	0	0	0	0	2	0	3	0	1	0	0	5	6	6	#NULL!	6	4	#NULL!	4	4
2	25	3	1	4	3	1	1	3	1	1	1	2	4	6	4	2	4	3	2	2	2	3	1	0	0	0	0	0	0	0	1	0	0	2	0	1	0	0	0	1	4	6	6	6	5	3	#NULL!	5	2
2	30	3	2	4	1	3	1	6	1	1	6	6	4	6	3	3	3	3	3	3	3	3	0	0	0	0	0	0	0	0	0	0	0	2	0	1	1	0	1	0	#NULL!	6	6	#NULL!	#NULL!	3	#NULL!	4	4
1	29	7	2	4	1	1	1	2	2	2	6	4	3	6	3	2	2	3	2	2	3	3	1	0	0	0	0	0	0	0	0	0	0	1	1	3	1	0	1	1	5	5	5	#NULL!	3	4	#NULL!	4	2
1	35	8	2	4	2	1	1	1	1	6	6	6	6	6	3	3	3	3	3	3	3	3	0	0	0	0	0	0	0	0	0	0	0	2	1	3	1	0	0	1	6	6	#NULL!	#NULL!	#NULL!	#NULL!	#NULL!	4	4
1	18	6	1	2	1	4	1	4	1	4	6	5	5	6	3	4	4	4	2	4	4	3	0	0	0	0	0	0	0	0	0	0	0	1	1	2	0	1	1	0	3	6	3	#NULL!	2	2	#NULL!	4	5
1	22	8	1	2	1	4	1	3	2	3	3	3	4	6	4	4	4	4	3	3	3	3	1	0	0	0	0	0	0	0	1	0	0	2	1	3	0	1	1	0	4	5	4	4	4	3	#NULL!	5	5
2	30	3	2	4	1	3	1	5	1	1	6	6	4	6	3	3	2	3	3	3	3	2	0	0	0	0	0	0	0	0	0	0	0	2	0	1	1	0	1	0	2	6	6	#NULL!	#NULL!	3	#NULL!	4	4
1	20	8	1	4	1	4	1	3	6	2	6	2	4	6	2	3	3	3	2	2	3	3	1	0	0	0	0	0	0	0	0	0	0	1	1	3	0	0	1	0	4	#NULL!	5	#NULL!	5	3	#NULL!	2	4
2	32	2	2	4	1	3	1	6	3	6	6	6	2	6	3	3	3	3	2	3	3	3	0	0	0	0	0	0	0	0	0	0	0	2	0	1	1	0	1	0	#NULL!	4	#NULL!	#NULL!	#NULL!	5	#NULL!	4	4
2	34	2	2	4	1	3	1	1	1	5	6	3	4	6	2	-1	-1	3	3	3	3	2	1	0	1	0	0	0	1	0	0	0	0	2	0	1	1	0	1	0	6	6	2	#NULL!	4	3	#NULL!	2	3
2	20	8	1	4	1	4	1	2	2	2	6	2	2	6	4	4	3	3	3	3	3	3	1	0	0	0	0	0	0	0	0	0	0	2	0	3	0	0	1	0	5	5	5	#NULL!	5	5	#NULL!	5	5
2	33	7	4	4	2	1	1	6	1	1	1	6	2	6	4	2	2	2	2	2	2	2	0	0	0	0	0	0	0	0	0	0	0	1	0	3	0	0	0	1	#NULL!	6	6	6	#NULL!	5	#NULL!	5	2
2	34	4	2	4	1	1	1	2	2	1	4	4	2	6	4	4	4	4	4	4	4	4	0	0	0	0	0	0	0	0	0	0	0	2	0	2	1	0	1	1	5	5	6	3	3	5	#NULL!	5	5
2	34	4	2	4	1	3	1	1	1	1	2	1	1	2	3	3	3	3	3	2	1	1	0	0	0	0	0	0	0	0	0	0	0	2	0	2	1	0	1	0	6	6	6	5	6	6	5	4	4
1	28	5	2	4	3	1	1	2	1	1	6	6	5	6	3	3	3	3	2	2	2	2	1	0	0	0	0	0	0	0	0	0	0	2	1	2	1	0	0	1	5	6	6	#NULL!	#NULL!	2	#NULL!	4	4
1	27	5	2	4	1	2	1	2	1	1	2	3	2	6	4	3	3	3	3	3	3	3	0	0	0	0	0	0	0	0	0	0	0	1	1	2	1	0	1	1	5	6	6	5	4	5	#NULL!	5	4
1	19	4	1	4	3	4	1	3	6	2	6	2	3	6	3	3	3	3	3	3	3	3	0	0	0	0	0	0	0	1	1	0	0	1	1	2	0	0	0	0	4	#NULL!	5	#NULL!	5	4	#NULL!	4	4
2	22	8	1	2	1	4	1	1	1	1	1	1	1	5	4	4	4	4	4	4	4	4	1	0	0	0	0	0	0	0	0	0	0	2	0	3	0	1	1	0	6	6	6	6	6	6	2	5	5
1	25	3	1	4	3	3	1	2	1	1	6	6	3	6	3	3	3	3	3	3	2	2	0	0	0	0	0	0	0	1	1	0	0	1	1	1	0	0	0	0	5	6	6	#NULL!	#NULL!	4	#NULL!	4	4
2	31	8	2	4	1	1	1	2	2	2	6	2	3	6	3	2	3	3	3	3	2	2	0	0	0	0	0	0	0	0	0	0	0	2	0	3	1	0	1	1	5	5	5	#NULL!	5	4	#NULL!	4	2
1	24	3	1	4	3	3	1	1	1	2	6	6	6	6	3	1	3	3	3	4	2	3	1	0	1	0	1	0	1	1	1	0	0	2	1	1	0	0	0	0	6	6	5	#NULL!	#NULL!	#NULL!	#NULL!	4	1
2	22	8	1	2	1	1	1	1	6	1	6	1	1	6	4	4	4	4	4	4	4	4	0	0	0	0	0	0	0	0	0	0	0	1	0	3	0	1	1	1	6	#NULL!	6	#NULL!	6	6	#NULL!	5	5
1	19	4	1	4	2	4	1	4	1	1	6	3	3	6	4	4	4	4	4	4	4	4	0	0	0	0	0	0	0	0	0	0	0	2	1	2	0	0	0	0	3	6	6	#NULL!	4	4	#NULL!	5	5
1	27	4	1	4	1	1	1	2	6	2	2	6	6	6	3	3	3	2	2	2	3	2	0	0	0	0	0	0	0	0	0	0	0	2	1	2	0	0	1	1	5	#NULL!	5	5	#NULL!	#NULL!	#NULL!	4	4
1	31	3	2	4	3	1	1	3	6	1	6	6	4	6	3	3	3	3	3	3	3	3	0	0	0	0	0	0	0	0	0	0	0	1	1	1	1	0	0	1	4	#NULL!	6	#NULL!	#NULL!	3	#NULL!	4	4
2	27	8	2	2	2	1	1	3	1	1	6	2	2	4	4	3	3	3	2	3	3	3	0	0	1	0	0	0	0	0	0	0	0	2	0	3	1	1	0	1	4	6	6	#NULL!	5	5	3	5	4
1	34	2	1	4	1	1	1	3	1	1	6	6	4	6	3	3	3	3	3	3	2	2	0	0	0	0	0	0	0	0	0	0	0	2	1	1	0	0	1	1	4	6	6	#NULL!	#NULL!	3	#NULL!	4	4
2	22	8	1	2	2	2	1	1	1	1	6	2	4	6	3	3	3	3	2	2	3	2	1	0	0	0	0	0	0	0	0	0	1	1	0	3	0	1	0	1	6	6	6	#NULL!	5	3	#NULL!	4	4
2	25	9	1	2	2	4	1	1	1	1	1	1	2	3	3	3	3	3	3	3	3	3	1	0	0	0	0	0	0	0	0	0	0	2	0	3	0	1	0	0	6	6	6	6	6	5	4	4	4
2	34	4	2	4	2	1	1	2	3	3	1	1	4	5	2	3	3	3	3	3	4	4	0	0	0	0	0	0	0	0	0	0	0	2	0	2	1	0	0	1	5	4	4	6	6	3	2	2	4
2	30	7	1	1	2	1	1	4	1	1	1	2	3	6	3	3	3	3	3	3	3	3	0	0	0	0	0	0	0	1	1	0	0	1	0	3	0	1	0	1	3	6	6	6	5	4	#NULL!	4	4
1	20	8	1	2	1	4	1	2	1	1	6	1	3	4	4	3	4	3	3	2	3	3	1	1	0	0	0	0	0	0	1	0	0	2	1	3	0	1	1	0	5	6	6	#NULL!	6	4	3	5	4
2	32	5	2	4	1	2	1	4	4	2	6	2	3	6	1	2	1	2	1	1	2	2	0	0	0	0	0	0	0	0	0	0	0	1	0	2	1	0	1	1	3	3	5	#NULL!	5	4	#NULL!	1	2
1	19	4	1	4	1	4	1	2	2	1	6	2	3	6	3	2	4	3	3	2	2	3	0	0	0	0	0	0	0	0	0	0	0	2	1	2	0	0	1	0	5	5	6	#NULL!	5	4	#NULL!	4	2
2	33	3	2	4	1	1	1	1	1	1	6	3	3	6	3	3	3	3	3	3	3	3	0	0	0	0	0	0	0	0	0	0	0	1	0	1	1	0	1	1	6	6	6	#NULL!	4	4	#NULL!	4	4
1	25	7	1	4	2	3	1	1	1	1	2	6	4	6	3	3	3	3	3	2	3	3	0	0	0	0	0	0	0	0	0	0	0	2	1	3	0	0	0	0	6	6	6	5	#NULL!	3	#NULL!	4	4
1	34	8	2	4	2	1	1	2	1	1	1	2	2	6	4	2	2	4	4	2	3	2	0	0	1	0	0	0	0	1	0	0	0	2	1	3	1	0	0	1	5	6	6	6	5	5	#NULL!	5	2
2	20	8	1	2	3	4	1	2	1	1	1	1	1	6	3	3	2	3	3	3	3	3	0	0	0	0	0	0	0	0	0	0	0	2	0	3	0	1	0	0	5	6	6	6	6	6	#NULL!	4	4
2	31	2	2	4	1	3	1	6	6	1	6	6	4	6	2	2	2	4	4	4	4	2	0	0	0	0	0	0	0	0	0	0	0	2	0	1	1	0	1	0	#NULL!	#NULL!	6	#NULL!	#NULL!	3	#NULL!	2	2
2	22	8	1	2	2	1	1	1	1	1	1	1	2	3	3	3	4	4	3	3	3	3	0	0	1	0	0	0	0	0	0	0	0	2	0	3	0	1	0	1	6	6	6	6	6	5	4	4	4
1	28	4	1	4	1	2	1	2	3	1	6	6	1	6	4	1	2	3	2	2	2	2	1	0	0	0	0	0	0	0	1	0	0	2	1	2	0	0	1	1	5	4	6	#NULL!	#NULL!	6	#NULL!	5	1
2	34	4	2	4	1	1	1	1	1	2	6	1	2	6	2	2	1	3	2	3	4	3	0	0	0	0	0	0	0	0	0	0	0	2	0	2	1	0	1	1	6	6	5	#NULL!	6	5	#NULL!	2	2
2	32	1	2	4	1	3	1	6	6	1	6	6	4	6	2	3	3	3	3	3	2	3	0	0	0	0	0	0	0	0	0	0	0	2	0	1	1	0	1	0	#NULL!	#NULL!	6	#NULL!	#NULL!	3	#NULL!	2	4
1	35	2	1	4	1	1	1	3	6	6	6	6	5	6	3	2	1	2	2	2	1	1	0	0	0	0	0	0	0	0	0	0	0	2	1	1	0	0	1	1	4	#NULL!	#NULL!	#NULL!	#NULL!	2	#NULL!	4	2
2	21	8	1	2	3	4	1	3	3	3	3	3	3	6	4	3	3	3	3	3	3	3	0	1	0	0	0	0	0	0	0	0	0	2	0	3	0	1	0	0	4	4	4	4	4	4	#NULL!	5	4
2	18	4	1	2	1	4	1	1	1	1	6	2	4	6	3	3	3	3	2	2	3	3	1	0	0	0	0	0	0	0	0	0	0	2	0	2	0	1	1	0	6	6	6	#NULL!	5	3	#NULL!	4	4
2	21	8	1	2	1	4	1	1	1	1	2	2	3	6	4	4	4	3	2	2	3	2	0	0	0	0	0	0	0	0	0	0	0	1	0	3	0	1	1	0	6	6	6	5	5	4	#NULL!	5	5
2	24	9	1	1	2	4	1	1	1	1	6	2	3	6	3	3	3	3	3	3	3	2	1	0	0	1	0	0	0	0	1	0	0	1	0	3	0	1	0	0	6	6	6	#NULL!	5	4	#NULL!	4	4
1	25	7	1	2	1	1	1	4	4	5	2	5	3	6	3	3	3	3	3	3	3	3	0	0	0	0	0	0	0	0	0	0	0	2	1	3	0	1	1	1	3	3	2	5	2	4	#NULL!	4	4
2	32	5	2	2	1	3	1	3	1	2	6	2	3	6	2	3	3	3	2	3	2	1	0	0	0	0	0	0	0	0	0	0	0	2	0	2	1	1	1	0	4	6	5	#NULL!	5	4	#NULL!	2	4
2	18	4	1	4	1	4	1	4	1	1	6	6	5	6	4	3	3	3	3	2	2	2	0	0	0	0	0	0	0	0	0	0	0	2	0	2	0	0	1	0	3	6	6	#NULL!	#NULL!	2	#NULL!	5	4
2	24	8	2	1	3	1	1	1	1	1	1	1	2	6	3	3	3	2	2	2	3	1	1	0	0	0	1	1	0	0	0	0	0	1	0	3	1	1	0	1	6	6	6	6	6	5	#NULL!	4	4
1	30	3	2	4	1	1	1	2	1	1	1	3	4	6	4	3	3	3	3	3	3	3	0	0	0	0	0	0	0	0	0	0	0	2	1	1	1	0	1	1	5	6	6	6	4	3	#NULL!	5	4
2	35	3	2	4	1	1	1	6	1	1	6	4	3	6	4	3	-1	3	4	4	2	2	0	0	0	0	0	0	0	0	0	0	0	2	0	1	1	0	1	1	#NULL!	6	6	#NULL!	3	4	#NULL!	5	4
2	22	7	1	2	1	3	1	2	4	1	2	2	2	6	4	2	2	2	2	2	3	1	0	0	0	0	0	0	0	0	1	0	0	2	0	3	0	1	1	0	5	3	6	5	5	5	#NULL!	5	2
1	33	7	1	4	2	1	1	2	2	2	2	6	2	6	4	4	4	4	4	4	4	4	0	0	0	0	0	0	0	0	1	0	0	1	1	3	0	0	0	1	5	5	5	5	#NULL!	5	#NULL!	5	5
2	19	4	1	4	1	4	1	1	1	1	6	1	2	6	3	3	3	3	3	3	3	3	0	0	0	0	0	0	0	0	0	0	0	2	0	2	0	0	1	0	6	6	6	#NULL!	6	5	#NULL!	4	4
2	29	7	2	4	2	1	1	1	1	1	1	1	1	5	2	2	2	2	3	3	3	3	1	0	0	0	0	0	0	0	0	0	0	1	0	3	1	0	0	1	6	6	6	6	6	6	2	2	2
2	34	3	2	4	1	1	1	3	1	1	3	3	4	6	3	3	3	3	3	2	3	2	0	0	1	0	0	0	0	1	0	0	0	1	0	1	1	0	1	1	4	6	6	4	4	3	#NULL!	4	4
2	26	3	2	4	1	3	1	3	1	1	6	6	2	6	-1	-1	-1	3	-1	-1	2	-1	0	0	0	0	0	0	0	0	0	0	0	2	0	1	1	0	1	0	4	6	6	#NULL!	#NULL!	5	#NULL!	3	3
2	19	8	1	2	1	4	1	2	1	1	6	3	4	6	3	4	4	3	3	2	3	3	1	0	0	0	0	0	0	0	1	0	0	2	0	3	0	1	1	0	5	6	6	#NULL!	4	3	#NULL!	4	5
1	26	7	1	2	2	1	1	1	1	1	3	1	1	2	3	3	3	3	3	3	3	3	1	1	1	0	0	0	0	0	1	0	0	2	1	3	0	1	0	1	6	6	6	4	6	6	5	4	4
2	32	5	2	4	1	1	1	2	3	1	1	1	1	5	4	3	4	3	3	3	2	2	0	0	0	0	0	0	0	0	1	0	0	2	0	2	1	0	1	1	5	4	6	6	6	6	2	5	4
1	31	3	2	4	1	1	1	3	1	1	6	6	4	6	1	1	1	1	1	1	1	1	0	0	0	0	0	0	0	0	0	0	0	1	1	1	1	0	1	1	4	6	6	#NULL!	#NULL!	3	#NULL!	1	1
2	32	7	2	1	2	1	1	2	4	1	1	2	2	5	3	2	3	3	2	3	3	3	0	0	0	0	0	0	0	0	0	0	0	1	0	3	1	1	0	1	5	3	6	6	5	5	2	4	2
1	23	7	1	2	3	2	1	1	1	1	1	1	1	6	2	3	3	3	3	3	3	1	1	0	0	0	0	0	0	0	0	0	0	1	1	3	0	1	0	1	6	6	6	6	6	6	#NULL!	2	4
2	25	9	6	1	2	1	1	1	3	1	1	2	2	5	4	4	4	4	4	4	4	4	1	0	0	1	0	0	0	0	0	0	0	2	0	3	1	1	0	1	6	4	6	6	5	5	2	5	5
1	24	7	1	2	3	1	1	2	1	1	6	3	2	4	4	2	3	3	2	3	3	3	1	0	0	0	0	0	0	0	0	0	0	2	1	3	0	1	0	1	5	6	6	#NULL!	4	5	3	5	2
2	24	7	2	2	1	1	1	1	1	1	6	5	2	6	4	3	4	4	3	3	3	3	0	0	0	0	0	0	0	0	0	0	0	1	0	3	1	1	1	1	6	6	6	#NULL!	2	5	#NULL!	5	4
2	32	4	2	4	3	3	1	4	1	2	6	6	5	6	3	3	3	3	3	3	4	3	0	0	0	0	0	0	0	0	0	0	0	1	0	2	1	0	0	0	3	6	5	#NULL!	#NULL!	2	#NULL!	4	4
2	18	4	1	2	1	4	1	1	1	1	1	1	1	6	3	3	3	3	3	3	3	3	0	0	0	0	0	0	0	0	0	0	0	2	0	2	0	1	1	0	6	6	6	6	6	6	#NULL!	4	4
2	22	2	2	4	1	3	1	1	1	1	6	5	1	6	4	4	4	4	4	4	4	4	0	0	0	0	0	0	0	0	0	0	0	2	0	1	1	0	1	0	6	6	6	#NULL!	2	6	#NULL!	5	5
2	21	3	1	2	1	2	1	6	2	1	6	2	2	6	3	2	2	2	2	2	2	2	0	0	0	0	0	0	0	0	0	0	0	2	0	1	0	1	1	1	#NULL!	5	6	#NULL!	5	5	#NULL!	4	2
2	34	4	2	4	1	3	1	1	1	6	5	2	2	6	3	3	3	3	3	3	3	3	0	0	0	0	0	0	0	1	0	0	0	1	0	2	1	0	1	0	6	6	#NULL!	2	5	5	#NULL!	4	4
1	21	8	1	2	2	4	1	2	1	1	1	1	2	4	4	3	3	3	2	3	3	3	1	0	0	0	0	0	0	0	0	0	0	2	1	3	0	1	0	0	5	6	6	6	6	5	3	5	4
2	19	8	1	2	3	4	1	3	1	2	6	3	2	6	3	3	3	3	3	3	3	3	0	0	0	0	0	0	0	0	0	0	0	2	0	3	0	1	0	0	4	6	5	#NULL!	4	5	#NULL!	4	4
2	19	7	1	4	1	4	1	1	1	1	6	1	2	6	4	4	4	4	4	4	4	4	0	0	0	0	0	0	0	0	0	0	0	1	0	3	0	0	1	0	6	6	6	#NULL!	6	5	#NULL!	5	5
2	27	8	1	4	1	1	1	2	1	1	6	1	2	5	4	2	3	3	2	2	3	2	0	0	0	0	0	0	0	0	0	0	0	2	0	3	0	0	1	1	5	6	6	#NULL!	6	5	2	5	2
1	23	5	1	4	1	3	1	4	2	1	6	6	2	6	4	4	4	3	3	3	3	3	0	0	0	0	0	0	0	0	0	0	0	2	1	2	0	0	1	0	3	5	6	#NULL!	#NULL!	5	#NULL!	5	5
2	30	3	3	4	1	1	1	5	1	1	1	1	1	6	3	3	3	3	3	3	3	3	0	0	0	0	0	0	0	0	0	0	0	2	0	1	1	0	1	1	2	6	6	6	6	6	#NULL!	4	4
2	34	3	2	4	3	3	1	1	2	3	6	1	5	6	4	3	4	3	3	3	3	3	0	0	0	0	0	0	0	0	0	0	0	2	0	1	1	0	0	0	6	5	4	#NULL!	6	2	#NULL!	5	4
1	21	7	1	4	1	4	1	1	1	1	3	6	3	6	4	4	4	3	3	3	4	3	1	0	0	0	0	0	0	0	0	0	0	2	1	3	0	0	1	0	6	6	6	4	#NULL!	4	#NULL!	5	5
1	32	4	2	4	1	1	1	1	1	1	1	1	1	1	3	2	3	2	3	3	3	1	1	0	1	0	0	0	0	0	0	0	0	2	1	2	1	0	1	1	6	6	6	6	6	6	6	4	2
1	30	3	2	4	1	2	1	1	2	1	6	6	3	6	3	3	3	3	3	2	3	3	1	0	0	0	0	0	0	0	0	0	0	1	1	1	1	0	1	1	6	5	6	#NULL!	#NULL!	4	#NULL!	4	4
2	27	3	2	1	2	1	1	5	5	2	6	4	3	6	3	3	3	3	3	3	3	3	0	0	0	0	0	0	0	0	0	0	0	2	0	1	1	1	0	1	2	2	5	#NULL!	3	4	#NULL!	4	4
1	29	7	2	4	3	1	1	1	1	6	1	6	1	6	4	2	2	3	2	2	3	2	1	0	1	0	1	0	0	0	0	0	0	2	1	3	1	0	0	1	6	6	#NULL!	6	#NULL!	6	#NULL!	5	2
2	34	7	2	4	2	1	1	1	1	1	6	6	4	6	3	3	3	3	3	3	3	3	0	0	0	0	0	0	0	0	0	0	0	2	0	3	1	0	0	1	6	6	6	#NULL!	#NULL!	3	#NULL!	4	4
1	21	3	1	2	2	1	1	2	1	1	6	6	5	6	4	3	3	3	4	4	4	4	0	0	0	0	0	0	0	0	0	0	0	2	1	1	0	1	0	1	5	6	6	#NULL!	#NULL!	2	#NULL!	5	4
1	34	4	2	4	1	1	1	1	1	1	6	6	6	6	4	4	-1	3	3	-1	3	3	0	0	0	0	0	0	0	0	0	0	0	2	1	2	1	0	1	1	6	6	6	#NULL!	#NULL!	#NULL!	#NULL!	5	5
1	35	7	2	4	2	1	1	1	4	1	6	2	5	6	3	3	3	3	3	3	2	3	1	0	0	0	0	0	0	0	0	0	0	2	1	3	1	0	0	1	6	3	6	#NULL!	5	2	#NULL!	4	4
2	26	7	2	4	1	1	1	2	2	3	6	2	6	6	3	3	3	3	3	3	3	3	0	0	0	0	0	0	0	0	0	0	0	2	0	3	1	0	1	1	5	5	4	#NULL!	5	#NULL!	#NULL!	4	4
1	33	3	2	4	1	1	1	1	1	1	6	3	1	6	1	4	3	3	3	3	3	3	0	0	0	0	0	0	0	0	0	0	0	1	1	1	1	0	1	1	6	6	6	#NULL!	4	6	#NULL!	1	5
1	24	3	2	4	1	3	1	4	1	1	6	3	3	6	4	4	4	4	4	4	4	4	1	0	0	0	0	0	0	0	0	0	0	1	1	1	1	0	1	0	3	6	6	#NULL!	4	4	#NULL!	5	5
2	27	8	2	4	1	2	1	2	2	2	2	2	2	2	4	4	4	4	4	4	4	4	0	0	0	0	0	0	0	0	0	0	0	2	0	3	1	0	1	1	5	5	5	5	5	5	5	5	5
2	33	3	2	4	1	3	1	6	3	2	6	4	2	6	2	4	2	2	3	3	1	1	1	0	0	0	0	0	0	0	0	0	1	1	0	1	1	0	1	0	#NULL!	4	5	#NULL!	3	5	#NULL!	2	5
1	19	4	1	2	1	4	1	1	1	2	6	2	5	6	4	4	4	4	3	3	3	4	0	0	0	0	0	0	0	0	0	0	0	2	1	2	0	1	1	0	6	6	5	#NULL!	5	2	#NULL!	5	5
1	19	4	1	4	1	4	1	3	2	2	6	2	4	6	3	3	3	3	2	3	3	3	1	0	0	1	1	0	0	0	1	0	0	2	1	2	0	0	1	0	4	5	5	#NULL!	5	3	#NULL!	4	4
1	33	7	2	2	1	3	1	1	1	1	6	1	4	6	3	-1	2	-1	4	2	2	2	0	0	0	0	0	0	0	0	0	0	0	2	1	3	1	1	1	0	6	6	6	#NULL!	6	3	#NULL!	4	3
2	20	8	1	2	1	4	1	1	1	1	1	1	3	6	3	3	3	3	2	2	3	2	1	0	0	0	0	0	0	0	0	0	0	2	0	3	0	1	1	0	6	6	6	6	6	4	#NULL!	4	4
1	31	8	2	2	2	1	1	1	1	1	1	3	4	6	3	3	3	3	3	3	3	3	0	0	0	0	0	0	0	0	0	0	0	2	1	3	1	1	0	1	6	6	6	6	4	3	#NULL!	4	4
2	35	2	3	4	1	3	1	1	1	2	6	6	4	6	2	3	3	3	3	3	3	3	0	0	0	0	0	0	0	1	1	0	0	1	0	1	1	0	1	0	6	6	5	#NULL!	#NULL!	3	#NULL!	2	4
2	28	8	1	4	1	1	1	1	1	1	1	1	4	6	2	3	4	3	3	2	2	2	1	0	0	0	0	0	0	0	0	0	0	2	0	3	0	0	1	1	6	6	6	6	6	3	#NULL!	2	4
1	28	7	1	1	2	1	1	1	3	1	1	1	1	1	4	4	4	4	4	4	4	4	0	0	0	0	0	0	0	0	1	0	0	1	1	3	0	1	0	1	6	4	6	6	6	6	6	5	5
2	18	8	1	2	1	4	1	5	2	1	6	2	3	6	4	3	4	3	3	3	4	2	0	0	0	0	0	0	0	0	0	0	0	2	0	3	0	1	1	0	2	5	6	#NULL!	5	4	#NULL!	5	4
1	20	4	1	2	1	4	1	1	1	1	6	5	6	6	4	4	4	4	3	3	3	3	0	0	0	0	0	0	0	0	0	0	0	2	1	2	0	1	1	0	6	6	6	#NULL!	2	#NULL!	#NULL!	5	5
1	31	3	1	4	1	2	1	1	1	1	6	4	5	6	3	3	3	3	3	3	3	3	0	0	0	0	0	0	0	0	0	0	0	1	1	1	0	0	1	1	6	6	6	#NULL!	3	2	#NULL!	4	4
2	19	7	1	2	1	4	1	3	2	2	6	1	2	6	4	3	3	3	3	2	3	3	0	0	0	0	0	0	0	0	0	0	0	2	0	3	0	1	1	0	4	5	5	#NULL!	6	5	#NULL!	5	4
1	31	3	2	4	3	1	1	2	1	1	1	3	1	6	1	3	3	2	2	2	1	1	1	0	0	0	0	0	0	1	1	0	0	1	1	1	1	0	0	1	5	6	6	6	4	6	#NULL!	1	4
2	21	8	1	2	2	4	1	2	1	4	6	5	3	6	3	3	3	3	3	3	3	3	0	0	0	0	0	0	0	0	0	0	0	2	0	3	0	1	0	0	5	6	3	#NULL!	2	4	#NULL!	4	4
2	18	4	1	2	2	4	1	3	1	1	3	2	2	6	4	3	3	3	3	3	3	3	1	0	0	0	0	0	0	0	1	0	0	2	0	2	0	1	0	0	4	6	6	4	5	5	#NULL!	5	4
1	30	7	2	2	1	1	1	2	2	2	2	2	2	2	3	3	3	3	3	3	3	3	0	0	0	0	0	0	0	0	0	0	0	2	1	3	1	1	1	1	5	5	5	5	5	5	5	4	4
1	35	8	2	4	3	1	1	2	1	1	6	2	2	5	4	4	3	3	2	3	3	3	1	0	1	0	0	0	0	0	0	0	0	1	1	3	1	0	0	1	5	6	6	#NULL!	5	5	2	5	5
1	22	3	1	4	3	1	1	1	1	1	1	1	1	1	3	3	3	3	3	3	3	3	0	0	0	0	0	0	0	0	0	0	0	1	1	1	0	0	0	1	6	6	6	6	6	6	6	4	4
2	27	4	2	4	1	3	1	1	1	1	6	1	5	6	4	2	4	4	1	1	3	1	0	0	0	0	0	0	0	0	0	0	0	2	0	2	1	0	1	0	6	6	6	#NULL!	6	2	#NULL!	5	2
2	20	4	6	4	3	3	1	5	1	1	1	2	1	6	3	3	3	3	3	2	3	2	0	0	0	0	0	0	0	0	0	0	0	2	0	2	1	0	0	0	2	6	6	6	5	6	#NULL!	4	4
2	19	4	1	2	1	4	1	5	1	2	6	2	4	6	3	3	3	3	3	3	3	3	0	0	0	0	0	0	0	0	0	0	0	2	0	2	0	1	1	0	2	6	5	#NULL!	5	3	#NULL!	4	4
2	19	4	1	4	1	4	1	3	2	3	6	1	3	6	3	3	3	3	3	3	3	3	1	0	0	0	0	0	0	0	0	0	0	2	0	2	0	0	1	0	4	5	4	#NULL!	6	4	#NULL!	4	4
1	22	8	1	2	1	4	1	2	2	2	2	2	3	3	3	3	3	3	3	3	3	3	0	0	1	0	0	1	0	1	1	0	0	2	1	3	0	1	1	0	5	5	5	5	5	4	4	4	4
2	33	5	2	4	1	1	1	2	2	2	2	2	2	2	3	3	3	3	3	3	3	3	0	0	0	0	0	0	0	0	0	0	0	1	0	2	1	0	1	1	5	5	5	5	5	5	5	4	4
1	18	2	1	4	1	2	1	6	3	1	2	3	6	6	3	3	3	4	4	3	1	2	0	0	0	0	0	0	0	0	0	0	0	2	1	1	0	0	1	1	#NULL!	4	6	5	4	#NULL!	#NULL!	4	4
1	19	7	1	4	2	4	1	1	1	1	6	1	1	6	3	3	3	3	3	3	3	3	0	0	0	0	0	0	0	0	0	0	0	2	1	3	0	0	0	0	6	6	6	#NULL!	6	6	#NULL!	4	4
2	31	3	2	4	1	1	1	4	1	6	6	4	2	6	3	3	3	3	2	3	2	2	0	0	0	0	0	0	0	0	0	0	0	1	0	1	1	0	1	1	3	6	#NULL!	#NULL!	3	5	#NULL!	4	4
1	23	8	1	4	2	4	1	1	1	1	1	3	4	1	3	1	1	1	3	3	3	3	0	0	0	0	0	0	0	0	0	0	0	2	1	3	0	0	0	0	6	6	6	6	4	3	6	4	1
1	35	5	2	4	1	1	1	2	1	1	6	6	6	6	2	3	4	4	2	1	3	3	0	0	0	0	0	0	0	0	1	0	0	1	1	2	1	0	1	1	5	6	6	#NULL!	#NULL!	#NULL!	#NULL!	2	4
1	28	6	2	4	1	1	1	3	2	1	1	3	4	6	3	3	3	3	2	3	3	3	0	0	0	0	0	0	0	0	0	0	0	2	1	2	1	0	1	1	4	5	6	6	4	3	#NULL!	4	4
2	20	7	1	2	1	4	1	2	1	1	6	1	2	6	4	4	4	4	4	4	4	4	0	0	0	0	0	0	0	0	0	0	0	2	0	3	0	1	1	0	5	6	6	#NULL!	6	5	#NULL!	5	5
2	29	4	2	4	1	3	1	3	1	1	6	5	5	6	1	3	3	3	3	3	4	2	0	0	0	0	0	0	0	0	0	0	0	2	0	2	1	0	1	0	4	6	6	#NULL!	2	2	#NULL!	1	4
2	31	5	2	4	1	3	1	2	1	1	6	4	4	6	4	3	4	4	3	4	4	4	0	0	0	0	0	0	0	0	0	1	0	2	0	2	1	0	1	0	5	6	6	#NULL!	3	3	#NULL!	5	4
2	22	8	1	2	1	3	1	2	2	2	2	2	2	2	3	3	3	3	1	2	3	3	0	0	0	0	0	0	0	0	0	0	0	2	0	3	0	1	1	0	5	5	5	5	5	5	5	4	4
1	18	4	1	4	3	4	1	2	1	4	6	1	3	6	4	3	3	3	3	3	3	3	1	0	0	0	0	0	0	0	0	0	0	2	1	2	0	0	0	0	5	6	3	#NULL!	6	4	#NULL!	5	4
2	35	3	1	4	3	1	1	1	1	1	6	6	1	6	3	3	3	3	3	3	3	3	0	0	0	0	0	0	0	0	0	0	0	2	0	1	0	0	0	1	6	6	6	#NULL!	#NULL!	6	#NULL!	4	4
2	18	4	1	4	1	4	1	3	1	1	6	2	3	6	4	3	4	3	3	4	4	3	1	0	0	0	0	0	0	0	0	0	0	2	0	2	0	0	1	0	4	6	6	#NULL!	5	4	#NULL!	5	4
1	26	4	2	4	1	2	1	1	1	1	1	1	4	6	3	2	2	2	3	3	2	2	0	0	0	0	0	0	0	0	0	0	0	2	1	2	1	0	1	1	6	6	6	6	6	3	#NULL!	4	2
2	34	3	2	4	1	1	1	1	1	1	6	3	3	6	4	2	3	4	4	4	3	3	0	0	0	0	0	0	0	0	0	0	0	2	0	1	1	0	1	1	6	6	6	#NULL!	4	4	#NULL!	5	2
2	28	3	2	4	1	3	1	3	1	3	6	6	4	6	3	3	3	3	2	-1	2	1	0	0	0	0	0	0	0	0	0	0	0	1	0	1	1	0	1	0	4	6	4	#NULL!	#NULL!	3	#NULL!	4	4
1	31	3	2	4	1	1	1	1	1	1	6	5	3	6	3	2	4	3	3	3	3	2	0	0	0	0	1	0	0	0	0	0	0	1	1	1	1	0	1	1	6	6	6	#NULL!	2	4	#NULL!	4	2
1	20	7	1	2	1	4	1	3	1	1	4	1	3	4	4	3	2	3	3	3	2	2	1	0	0	0	0	0	0	0	1	0	0	2	1	3	0	1	1	0	4	6	6	3	6	4	3	5	4
2	23	7	2	4	1	3	1	1	2	3	5	1	2	6	3	3	3	3	3	2	3	2	1	0	0	0	0	0	0	0	0	0	0	2	0	3	1	0	1	0	6	5	4	2	6	5	#NULL!	4	4
2	34	3	2	4	1	1	1	5	2	2	6	6	5	6	2	2	2	2	2	2	2	2	0	0	0	0	0	0	0	0	0	0	0	2	0	1	1	0	1	1	2	5	5	#NULL!	#NULL!	2	#NULL!	2	2
1	22	7	1	4	3	1	1	2	1	1	1	2	4	6	4	4	4	3	2	2	3	3	0	0	0	0	0	0	0	0	0	0	0	1	1	3	0	0	0	1	5	6	6	6	5	3	#NULL!	5	5
2	34	8	2	4	2	1	1	2	1	1	2	1	4	6	3	2	2	3	3	2	3	2	0	0	0	0	0	0	0	1	0	0	0	2	0	3	1	0	0	1	5	6	6	5	6	3	#NULL!	4	2
2	30	2	2	4	1	1	1	2	2	2	6	2	4	6	3	3	3	3	3	3	3	3	0	0	0	0	0	0	0	0	0	0	0	1	0	1	1	0	1	1	5	5	5	#NULL!	5	3	#NULL!	4	4
2	32	3	2	4	2	2	1	1	1	1	6	1	4	6	3	3	3	3	3	3	3	3	0	0	0	0	0	0	0	0	0	0	0	2	0	1	1	0	0	1	6	6	6	#NULL!	6	3	#NULL!	4	4
2	33	3	2	4	1	3	1	1	1	3	6	6	2	6	4	4	4	4	4	4	4	4	0	0	0	0	0	0	0	0	0	0	0	1	0	1	1	0	1	0	6	6	4	#NULL!	#NULL!	5	#NULL!	5	5
1	23	9	2	1	3	1	1	1	1	1	1	1	1	5	4	3	3	3	3	2	3	2	1	0	0	0	0	0	0	0	0	0	0	2	1	3	1	1	0	1	6	6	6	6	6	6	2	5	4
2	20	8	1	4	3	4	1	2	1	1	1	1	3	2	3	3	3	4	2	2	3	3	1	0	0	0	0	0	0	0	0	1	0	2	0	3	0	0	0	0	5	6	6	6	6	4	5	4	4
1	34	4	2	4	1	1	1	4	1	3	1	3	3	6	1	1	1	1	1	1	1	1	0	0	0	0	0	0	0	1	0	0	0	1	1	2	1	0	1	1	3	6	4	6	4	4	#NULL!	1	1
2	35	3	2	4	1	1	1	1	1	1	6	2	3	6	3	-1	3	2	2	3	3	2	0	0	0	0	0	0	0	0	0	0	0	2	0	1	1	0	1	1	6	6	6	#NULL!	5	4	#NULL!	4	3
2	33	8	2	4	1	1	1	2	2	1	1	1	4	6	3	2	3	3	3	2	2	2	0	1	1	0	0	1	0	0	0	0	0	2	0	3	1	0	1	1	5	5	6	6	6	3	#NULL!	4	2
1	34	3	2	4	1	2	1	1	1	1	6	3	4	6	3	2	3	2	2	3	3	2	1	0	0	0	0	0	0	0	0	0	0	1	1	1	1	0	1	1	6	6	6	#NULL!	4	3	#NULL!	4	2
1	20	4	1	4	3	1	1	1	1	1	1	1	1	1	3	3	3	3	3	3	3	3	1	0	0	0	0	0	0	0	0	0	0	2	1	2	0	0	0	1	6	6	6	6	6	6	6	4	4
2	34	4	2	4	1	1	1	5	4	1	6	6	4	6	1	3	2	2	2	2	2	2	0	0	1	0	0	0	0	0	0	0	0	1	0	2	1	0	1	1	2	3	6	#NULL!	#NULL!	3	#NULL!	1	4
1	21	8	1	2	1	4	1	1	1	3	6	2	3	6	4	3	3	3	2	2	3	2	1	0	0	1	0	0	0	0	0	0	0	2	1	3	0	1	1	0	6	6	4	#NULL!	5	4	#NULL!	5	4
1	22	7	1	1	2	2	1	2	2	6	6	1	3	6	4	4	4	4	3	3	4	4	0	0	0	0	0	0	0	0	0	0	0	2	1	3	0	1	0	1	5	5	#NULL!	#NULL!	6	4	#NULL!	5	5
2	26	7	2	4	1	3	1	3	2	1	5	5	1	6	3	3	3	3	3	3	3	3	0	0	0	0	0	0	0	0	0	0	0	2	0	3	1	0	1	0	4	5	6	2	2	6	#NULL!	4	4
2	33	3	2	4	1	1	1	3	1	1	2	2	2	6	4	3	3	3	3	3	3	3	0	0	0	0	0	0	0	0	0	0	0	2	0	1	1	0	1	1	4	6	6	5	5	5	#NULL!	5	4
2	31	3	2	4	4	3	1	3	1	1	6	6	3	6	2	3	3	3	3	2	2	2	0	0	0	0	0	0	0	0	1	0	0	2	0	1	1	0	0	0	4	6	6	#NULL!	#NULL!	4	#NULL!	2	4
2	26	2	2	4	1	1	1	2	2	1	6	6	4	6	-1	-1	3	3	3	3	3	1	0	0	0	0	0	0	0	0	0	0	0	2	0	1	1	0	1	1	5	5	6	#NULL!	#NULL!	3	#NULL!	3	3
2	32	3	2	4	1	1	1	1	1	1	6	6	2	6	3	3	3	3	3	3	3	3	0	0	0	0	0	0	0	0	0	0	0	1	0	1	1	0	1	1	6	6	6	#NULL!	#NULL!	5	#NULL!	4	4
1	33	3	2	4	1	1	1	1	1	1	1	1	1	6	3	3	3	3	2	3	3	3	1	0	0	0	0	0	0	0	1	0	0	1	1	1	1	0	1	1	6	6	6	6	6	6	#NULL!	4	4
2	34	3	2	4	1	1	1	1	1	3	3	1	2	6	1	-1	-1	3	2	-1	1	1	0	0	0	0	0	0	0	0	0	0	0	2	0	1	1	0	1	1	6	6	4	4	6	5	#NULL!	1	3
2	34	3	2	4	1	3	1	3	1	3	6	3	2	6	3	3	3	3	3	-1	3	3	0	0	0	0	0	0	0	0	0	0	0	1	0	1	1	0	1	0	4	6	4	#NULL!	4	5	#NULL!	4	4
2	33	3	2	4	1	3	1	3	2	6	6	6	3	6	1	3	3	3	2	2	2	2	0	0	0	0	0	0	0	0	0	0	0	1	0	1	1	0	1	0	4	5	#NULL!	#NULL!	#NULL!	4	#NULL!	1	4
2	34	8	2	4	1	2	1	2	1	1	1	1	2	6	3	3	3	2	2	3	2	2	1	0	0	0	0	0	0	0	0	0	0	2	0	3	1	0	1	1	5	6	6	6	6	5	#NULL!	4	4
2	35	3	2	4	1	1	1	5	1	2	1	3	4	6	3	3	3	3	3	3	3	3	0	0	0	0	0	0	0	0	0	0	0	2	0	1	1	0	1	1	2	6	5	6	4	3	#NULL!	4	4
2	31	8	2	4	1	1	1	1	1	1	2	6	2	6	4	4	4	4	2	3	4	3	1	0	0	0	0	0	0	0	0	0	0	1	0	3	1	0	1	1	6	6	6	5	#NULL!	5	#NULL!	5	5
1	34	3	2	4	3	1	1	2	1	2	6	6	3	6	3	4	4	4	3	3	3	3	0	0	0	0	0	0	0	0	0	0	0	1	1	1	1	0	0	1	5	6	5	#NULL!	#NULL!	4	#NULL!	4	5
2	30	8	2	4	1	1	1	1	1	1	1	1	2	5	3	3	3	3	3	2	3	2	0	0	0	0	0	0	0	0	0	0	0	2	0	3	1	0	1	1	6	6	6	6	6	5	2	4	4
2	35	3	2	4	1	1	1	1	1	1	6	1	3	6	3	3	3	3	3	3	3	3	0	0	0	0	0	0	0	0	0	0	0	1	0	1	1	0	1	1	6	6	6	#NULL!	6	4	#NULL!	4	4
1	18	4	1	4	3	4	1	5	1	2	6	1	5	6	3	3	3	3	3	3	3	3	0	0	0	0	0	0	0	0	0	0	0	2	1	2	0	0	0	0	2	6	5	#NULL!	6	2	#NULL!	4	4
2	31	4	2	4	1	3	1	1	1	1	6	3	3	6	2	1	1	1	2	2	2	2	0	0	0	0	0	0	1	0	1	0	0	2	0	2	1	0	1	0	6	6	6	#NULL!	4	4	#NULL!	2	1
2	34	3	2	4	3	1	1	1	1	6	6	1	5	6	3	3	4	3	3	3	3	3	0	0	0	0	0	0	0	0	0	0	0	2	0	1	1	0	0	1	6	6	#NULL!	#NULL!	6	2	#NULL!	4	4
1	19	8	1	2	1	4	1	2	2	1	6	1	3	6	3	3	3	3	2	3	2	2	0	0	0	0	0	0	0	0	0	0	0	2	1	3	0	1	1	0	5	5	6	#NULL!	6	4	#NULL!	4	4
1	33	9	2	1	2	1	1	3	1	1	1	1	3	3	3	3	3	3	3	3	3	2	1	0	0	0	0	0	0	0	1	0	0	2	1	3	1	1	0	1	4	6	6	6	6	4	4	4	4
2	23	7	1	2	1	1	1	4	1	1	1	4	2	6	3	2	1	3	3	3	3	3	0	0	0	0	0	0	0	0	0	0	0	2	0	3	0	1	1	1	3	6	6	6	3	5	#NULL!	4	2
2	35	3	2	4	1	3	1	2	4	2	6	2	2	6	3	3	3	3	3	3	3	3	0	0	0	0	0	0	0	1	1	0	0	1	0	1	1	0	1	0	5	3	5	#NULL!	5	5	#NULL!	4	4
2	32	8	2	1	2	1	1	1	1	1	1	1	2	6	4	3	3	3	3	3	3	3	0	0	0	0	0	0	0	0	0	0	0	2	0	3	1	1	0	1	6	6	6	6	6	5	#NULL!	5	4
1	19	4	1	2	3	4	1	1	1	1	6	1	4	6	4	3	2	3	3	3	3	2	0	0	0	0	0	0	0	0	0	0	0	2	1	2	0	1	0	0	6	6	6	#NULL!	6	3	#NULL!	5	4
2	34	7	2	4	1	2	1	1	2	1	1	1	2	6	2	3	3	3	3	4	4	3	0	0	0	0	0	0	0	1	1	0	0	1	0	3	1	0	1	1	6	5	6	6	6	5	#NULL!	2	4
2	33	3	2	4	1	3	1	5	1	6	6	2	3	6	4	4	4	4	3	3	3	3	0	0	0	0	0	0	0	0	0	0	0	2	0	1	1	0	1	0	2	6	#NULL!	#NULL!	5	4	#NULL!	5	5
2	19	8	1	4	1	4	1	2	1	1	2	1	1	4	4	4	4	4	3	3	3	3	0	0	0	0	0	0	0	0	0	0	0	2	0	3	0	0	1	0	5	6	6	5	6	6	3	5	5
1	21	7	1	4	1	4	1	1	1	1	6	1	1	6	4	4	4	4	4	4	4	4	0	0	0	0	0	0	0	0	0	0	0	1	1	3	0	0	1	0	6	6	6	#NULL!	6	6	#NULL!	5	5
2	23	8	1	2	1	4	1	1	1	1	6	1	4	6	3	3	3	3	2	1	2	2	1	0	0	0	0	0	0	0	1	0	1	1	0	3	0	1	1	0	6	6	6	#NULL!	6	3	#NULL!	4	4
2	21	8	1	2	1	4	1	3	1	1	1	1	1	6	3	4	4	3	3	2	3	2	0	0	0	0	0	0	0	0	0	0	0	2	0	3	0	1	1	0	4	6	6	6	6	6	#NULL!	4	5
1	32	3	2	4	1	2	1	1	1	1	2	6	3	6	3	3	4	3	3	3	3	3	0	0	0	0	0	0	0	0	0	0	0	2	1	1	1	0	1	1	6	6	6	5	#NULL!	4	#NULL!	4	4
2	32	7	2	4	1	1	1	2	2	2	6	6	3	6	4	4	3	3	3	2	3	2	0	0	0	0	0	0	0	0	0	0	1	1	0	3	1	0	1	1	5	5	5	#NULL!	#NULL!	4	#NULL!	5	5
1	19	3	1	4	1	1	1	1	1	1	2	6	3	6	3	2	2	3	3	3	3	2	0	0	0	0	0	0	0	1	0	0	0	1	1	1	0	0	1	1	6	6	6	5	#NULL!	4	#NULL!	4	2
1	18	5	1	4	1	4	1	2	2	1	2	2	2	5	4	3	3	3	3	3	3	3	0	0	0	0	0	0	0	0	0	0	0	2	1	2	0	0	1	0	5	5	6	5	5	5	2	5	4
2	20	8	1	2	1	4	1	3	2	1	6	4	3	6	3	3	3	3	3	3	3	3	1	0	0	0	0	0	0	0	0	0	0	2	0	3	0	1	1	0	4	5	6	#NULL!	3	4	#NULL!	4	4
2	26	7	2	2	1	3	1	3	1	1	1	5	5	6	4	3	3	3	2	2	3	2	1	1	0	0	0	0	0	1	0	0	0	1	0	3	1	1	1	0	4	6	6	6	2	2	#NULL!	5	4
2	27	5	2	4	1	3	1	1	1	1	1	1	2	6	4	3	4	3	3	2	2	3	0	0	0	0	0	0	0	0	0	0	0	2	0	2	1	0	1	0	6	6	6	6	6	5	#NULL!	5	4
1	31	8	1	1	1	1	1	1	3	1	2	3	4	5	3	3	3	3	3	2	3	3	0	0	0	0	0	0	0	0	0	0	0	2	1	3	0	1	1	1	6	4	6	5	4	3	2	4	4
2	19	7	1	4	1	4	1	3	2	2	6	2	4	6	3	3	3	3	3	3	3	3	0	0	0	0	0	0	0	0	0	0	0	1	0	3	0	0	1	0	4	5	5	#NULL!	5	3	#NULL!	4	4
1	26	7	1	2	2	2	1	2	2	2	2	3	4	5	3	3	4	3	2	2	3	3	1	0	0	0	0	0	0	0	0	0	1	2	1	3	0	1	0	1	5	5	5	5	4	3	2	4	4
2	30	8	2	4	1	1	1	2	2	1	1	2	1	3	3	3	3	3	3	3	3	3	0	0	0	0	0	0	0	0	0	0	0	2	0	3	1	0	1	1	5	5	6	6	5	6	4	4	4
1	22	8	1	2	1	4	1	5	2	1	4	2	4	6	3	4	3	3	3	3	3	3	0	0	0	0	0	0	0	0	0	0	0	2	1	3	0	1	1	0	2	5	6	3	5	3	#NULL!	4	5
2	18	6	1	2	3	4	1	4	1	1	6	2	2	6	4	4	4	4	3	2	4	3	0	0	0	0	0	0	0	0	0	0	0	2	0	2	0	1	0	0	3	6	6	#NULL!	5	5	#NULL!	5	5
2	28	7	1	4	1	1	1	2	3	1	1	2	3	6	3	3	3	2	3	3	3	3	0	0	0	0	0	0	0	0	0	0	0	2	0	3	0	0	1	1	5	4	6	6	5	4	#NULL!	4	4
1	21	8	1	2	3	4	1	1	1	1	6	2	1	1	3	3	3	3	2	3	3	3	1	0	0	0	0	0	0	0	1	0	0	2	1	3	0	1	0	0	6	6	6	#NULL!	5	6	6	4	4
1	19	7	1	2	1	4	1	2	1	1	6	2	2	6	3	2	3	2	1	2	3	2	0	0	0	0	0	0	0	0	0	0	0	2	1	3	0	1	1	0	5	6	6	#NULL!	5	5	#NULL!	4	2
2	30	7	2	4	1	2	1	2	1	2	3	3	2	6	4	3	3	3	2	2	3	2	1	0	0	0	0	0	0	1	0	0	1	1	0	3	1	0	1	1	5	6	5	4	4	5	#NULL!	5	4
1	22	8	1	1	2	4	1	1	3	1	2	2	3	6	4	4	4	4	3	2	4	4	1	0	0	0	0	0	0	0	0	0	0	2	1	3	0	1	0	0	6	4	6	5	5	4	#NULL!	5	5
2	21	8	1	2	1	4	1	1	1	1	3	2	2	6	3	3	3	2	2	3	2	2	1	0	0	0	0	0	0	0	0	0	0	2	0	3	0	1	1	0	6	6	6	4	5	5	#NULL!	4	4
2	34	5	2	4	1	3	1	1	6	2	2	2	2	6	3	3	3	3	2	2	2	2	0	0	0	0	0	0	0	0	0	0	0	2	0	2	1	0	1	0	6	#NULL!	5	5	5	5	#NULL!	4	4
1	22	3	1	4	3	3	1	4	2	1	5	6	4	6	3	3	3	3	3	3	3	3	1	0	0	0	0	0	0	0	0	0	0	1	1	1	0	0	0	0	3	5	6	2	#NULL!	3	#NULL!	4	4
2	33	4	2	4	1	1	1	3	1	1	1	1	3	6	3	2	2	3	3	2	2	1	0	0	0	0	0	1	0	0	0	0	0	2	0	2	1	0	1	1	4	6	6	6	6	4	#NULL!	4	2
2	35	4	2	4	1	3	1	5	3	1	5	4	3	5	4	4	4	4	3	3	3	3	0	0	0	0	0	0	0	0	0	0	0	1	0	2	1	0	1	0	2	4	6	2	3	4	2	5	5
1	19	4	1	4	3	4	1	5	1	1	6	2	4	6	4	4	4	4	4	4	4	3	0	0	0	0	0	0	0	0	0	0	0	2	1	2	0	0	0	0	2	6	6	#NULL!	5	3	#NULL!	5	5
1	21	8	1	2	1	4	1	1	1	1	2	1	4	6	4	4	4	3	2	-1	3	-1	0	0	0	0	0	0	0	0	0	0	0	2	1	3	0	1	1	0	6	6	6	5	6	3	#NULL!	5	5
1	32	9	2	4	3	1	1	1	1	1	1	1	1	6	4	4	3	3	3	3	3	3	0	0	0	0	0	0	0	0	0	0	0	2	1	3	1	0	0	1	6	6	6	6	6	6	#NULL!	5	5
2	19	7	1	4	1	4	1	2	2	3	5	2	4	6	4	3	4	4	4	3	4	4	0	0	0	0	0	0	0	0	0	0	0	2	0	3	0	0	1	0	5	5	4	2	5	3	#NULL!	5	4
2	18	4	1	4	1	4	1	3	2	1	6	2	2	6	3	3	3	3	3	3	3	3	1	0	0	0	0	0	0	0	1	0	0	2	0	2	0	0	1	0	4	5	6	#NULL!	5	5	#NULL!	4	4
1	18	4	1	2	3	4	1	2	1	1	2	6	3	6	4	3	3	3	3	3	3	2	1	1	0	1	1	1	0	0	0	0	0	2	1	2	0	1	0	0	5	6	6	5	#NULL!	4	#NULL!	5	4
1	32	8	2	1	2	1	1	1	3	1	1	1	4	6	4	4	4	3	3	2	3	2	1	0	0	0	0	1	0	1	1	0	0	1	1	3	1	1	0	1	6	4	6	6	6	3	#NULL!	5	5
2	27	3	2	4	1	1	1	3	1	1	1	6	2	6	4	4	4	4	2	3	2	3	0	0	0	0	0	0	0	0	0	0	0	2	0	1	1	0	1	1	4	6	6	6	#NULL!	5	#NULL!	5	5
2	22	8	1	2	3	4	1	2	1	1	1	1	1	5	3	3	3	3	3	3	3	3	1	0	0	0	0	0	0	0	0	0	0	2	0	3	0	1	0	0	5	6	6	6	6	6	2	4	4
1	29	4	2	4	3	1	1	3	1	1	1	5	2	3	3	3	3	3	3	3	3	3	0	0	0	0	0	0	0	1	0	0	0	2	1	2	1	0	0	1	4	6	6	6	2	5	4	4	4
2	29	7	2	4	1	1	1	5	2	2	2	2	4	6	3	3	4	3	3	-1	2	2	1	0	0	1	0	0	0	0	0	0	0	2	0	3	1	0	1	1	2	5	5	5	5	3	#NULL!	4	4
1	30	4	2	4	1	3	1	6	2	1	6	5	3	6	3	3	3	3	3	3	3	3	0	0	0	0	0	0	0	0	0	0	0	2	1	2	1	0	1	0	#NULL!	5	6	#NULL!	2	4	#NULL!	4	4
2	22	7	1	2	1	1	1	5	2	1	4	4	3	6	4	4	3	3	3	3	3	3	0	0	0	0	0	0	0	1	0	0	0	1	0	3	0	1	1	1	2	5	6	3	3	4	#NULL!	5	5
2	19	7	1	4	1	4	1	2	1	1	4	3	1	6	3	3	3	3	-1	2	3	2	0	0	0	0	0	0	0	0	0	0	0	2	0	3	0	0	1	0	5	6	6	3	4	6	#NULL!	4	4
2	28	7	2	2	3	2	1	4	1	2	1	2	2	6	3	3	3	3	3	3	3	3	1	0	0	0	1	0	0	0	0	0	1	2	0	3	1	1	0	1	3	6	5	6	5	5	#NULL!	4	4
1	30	2	1	4	1	2	1	6	1	6	6	6	6	6	4	3	3	3	2	4	4	4	0	0	1	0	1	1	0	0	0	0	0	2	1	1	0	0	1	1	#NULL!	6	#NULL!	#NULL!	#NULL!	#NULL!	#NULL!	5	4
1	26	7	1	2	1	2	1	1	2	3	6	4	1	6	4	4	4	4	3	3	3	3	0	0	0	0	0	0	0	0	0	0	0	1	1	3	0	1	1	1	6	5	4	#NULL!	3	6	#NULL!	5	5
1	28	4	2	4	1	2	1	2	1	4	1	4	4	6	3	2	2	2	2	2	2	1	0	0	0	0	0	0	0	0	0	0	0	2	1	2	1	0	1	1	5	6	3	6	3	3	#NULL!	4	2
2	24	7	1	4	2	2	1	1	3	1	4	3	2	6	3	3	3	3	3	3	3	3	0	0	0	0	0	0	0	0	0	0	0	2	0	3	0	0	0	1	6	4	6	3	4	5	#NULL!	4	4
2	20	8	1	4	3	4	1	4	3	3	6	2	2	6	3	3	3	4	2	3	3	3	1	0	0	0	0	0	0	0	0	0	0	2	0	3	0	0	0	0	3	4	4	#NULL!	5	5	#NULL!	4	4
1	20	4	1	2	3	4	1	3	1	1	6	1	3	6	4	3	3	3	3	3	3	3	0	0	0	0	1	0	0	0	0	0	0	1	1	2	0	1	0	0	4	6	6	#NULL!	6	4	#NULL!	5	4
2	29	3	2	4	1	3	1	3	1	1	5	3	4	6	3	3	3	3	3	3	3	3	0	0	0	0	0	0	0	0	0	0	0	2	0	1	1	0	1	0	4	6	6	2	4	3	#NULL!	4	4
2	32	8	2	4	1	3	1	2	3	4	6	6	4	4	3	3	3	3	2	2	2	2	1	0	0	0	0	0	0	0	0	0	0	2	0	3	1	0	1	0	5	4	3	#NULL!	#NULL!	3	3	4	4
1	24	8	1	2	3	2	1	3	2	1	3	1	4	4	3	3	3	3	3	3	3	3	0	0	0	0	0	0	0	0	0	0	0	2	1	3	0	1	0	1	4	5	6	4	6	3	3	4	4
2	30	8	2	4	3	2	1	5	2	1	2	2	2	6	4	4	4	4	4	3	4	3	1	1	0	0	0	0	0	0	0	0	0	2	0	3	1	0	0	1	2	5	6	5	5	5	#NULL!	5	5
1	35	8	2	4	3	1	1	2	1	1	1	3	1	6	4	3	3	3	3	3	3	3	1	0	1	0	0	0	0	0	0	0	1	2	1	3	1	0	0	1	5	6	6	6	4	6	#NULL!	5	4
2	20	4	1	2	1	4	1	3	2	1	6	3	4	6	4	4	4	4	3	3	3	3	1	0	0	0	0	0	0	0	0	0	0	2	0	2	0	1	1	0	4	5	6	#NULL!	4	3	#NULL!	5	5
2	22	8	1	2	1	4	1	4	2	1	5	1	3	6	3	3	4	3	2	3	3	3	0	0	0	0	0	0	0	0	1	0	0	2	0	3	0	1	1	0	3	5	6	2	6	4	#NULL!	4	4
1	20	8	1	2	1	4	1	4	1	1	6	1	2	6	4	4	4	3	3	3	4	3	0	0	0	0	0	0	0	0	0	0	0	2	1	3	0	1	1	0	3	6	6	#NULL!	6	5	#NULL!	5	5
1	21	7	1	4	1	3	1	1	2	1	6	2	4	6	4	4	3	3	2	3	3	3	1	0	1	0	0	0	0	0	0	0	0	1	1	3	0	0	1	0	6	5	6	#NULL!	5	3	#NULL!	5	5
2	24	2	2	4	1	3	1	6	2	1	6	6	4	6	2	3	3	3	3	3	3	3	0	0	0	0	0	0	0	0	0	0	0	2	0	1	1	0	1	0	#NULL!	5	6	#NULL!	#NULL!	3	#NULL!	2	4
2	22	8	1	4	1	4	1	4	2	3	6	1	2	6	3	3	4	3	2	2	3	2	0	0	0	0	0	0	0	0	0	0	0	2	0	3	0	0	1	0	3	5	4	#NULL!	6	5	#NULL!	4	4
2	33	2	2	4	1	3	1	6	1	1	1	6	1	6	2	3	-1	2	-1	2	1	-1	0	0	0	0	0	0	0	0	0	0	0	2	0	1	1	0	1	0	#NULL!	6	6	6	#NULL!	6	#NULL!	2	4
2	28	7	2	4	1	3	1	2	2	1	6	6	2	3	3	3	3	3	2	2	3	2	1	0	0	0	0	0	0	0	0	0	0	1	0	3	1	0	1	0	5	5	6	#NULL!	#NULL!	5	4	4	4
2	19	4	1	4	1	4	1	1	1	1	6	3	4	6	3	3	4	4	3	3	4	3	0	0	0	0	0	0	0	0	0	0	0	2	0	2	0	0	1	0	6	6	6	#NULL!	4	3	#NULL!	4	4
2	20	4	1	2	1	4	1	6	2	1	6	2	4	6	4	3	3	3	3	3	3	3	0	0	0	0	0	0	0	0	0	0	0	2	0	2	0	1	1	0	#NULL!	5	6	#NULL!	5	3	#NULL!	5	4
2	31	3	2	4	3	3	1	6	1	4	6	2	2	6	3	2	3	3	2	2	3	2	0	0	0	0	0	0	0	0	0	0	0	1	0	1	1	0	0	0	#NULL!	6	3	#NULL!	5	5	#NULL!	4	2
2	34	3	2	2	1	3	1	1	1	1	6	1	3	6	3	3	3	3	3	3	3	3	0	0	0	0	0	0	0	0	0	0	0	2	0	1	1	1	1	0	6	6	6	#NULL!	6	4	#NULL!	4	4
2	31	6	2	4	1	3	1	2	1	2	6	2	6	6	3	3	3	3	3	3	3	3	0	0	0	0	0	0	0	0	0	0	0	2	0	2	1	0	1	0	5	6	5	#NULL!	5	#NULL!	#NULL!	4	4
1	28	8	1	2	1	1	1	1	2	2	6	5	4	6	4	4	4	4	4	1	3	3	1	0	0	0	0	0	0	0	1	0	0	2	1	3	0	1	1	1	6	5	5	#NULL!	2	3	#NULL!	5	5
1	32	5	2	4	1	1	1	1	2	1	6	4	4	6	3	3	3	3	2	3	1	1	0	0	0	0	0	0	0	1	1	0	0	2	1	2	1	0	1	1	6	5	6	#NULL!	3	3	#NULL!	4	4
2	23	8	1	1	3	4	1	1	1	1	5	1	3	6	3	3	3	3	2	2	3	3	1	0	0	0	0	0	0	0	0	0	0	2	0	3	0	1	0	0	6	6	6	2	6	4	#NULL!	4	4
2	32	5	2	4	1	1	1	3	2	1	2	4	2	6	3	-1	-1	2	3	3	2	1	1	0	0	0	0	0	0	0	0	0	0	2	0	2	1	0	1	1	4	5	6	5	3	5	#NULL!	4	3
1	31	4	1	1	1	1	1	1	2	2	2	2	2	6	4	4	4	4	4	4	4	4	0	0	0	0	0	0	0	1	1	0	0	1	1	2	0	1	1	1	6	5	5	5	5	5	#NULL!	5	5
2	30	5	2	4	1	1	1	1	1	1	3	6	4	6	4	2	3	4	2	3	3	4	0	0	0	0	0	0	0	0	0	0	0	1	0	2	1	0	1	1	6	6	6	4	#NULL!	3	#NULL!	5	2
2	22	8	1	4	1	4	1	3	1	3	5	2	4	6	3	3	3	3	3	3	3	3	1	0	0	0	0	0	1	0	0	0	0	1	0	3	0	0	1	0	4	6	4	2	5	3	#NULL!	4	4
1	21	5	1	4	1	1	1	2	3	1	6	6	4	6	3	3	3	3	3	3	3	3	0	0	0	0	0	0	0	0	0	0	0	2	1	2	0	0	1	1	5	4	6	#NULL!	#NULL!	3	#NULL!	4	4
2	33	3	2	4	1	1	1	6	3	2	6	2	6	6	2	3	3	3	1	2	2	1	0	0	0	0	0	0	1	0	0	0	0	2	0	1	1	0	1	1	#NULL!	4	5	#NULL!	5	#NULL!	#NULL!	2	4
2	26	9	1	1	1	3	1	1	1	4	6	2	4	6	4	4	4	2	2	2	3	3	1	0	0	0	0	0	0	0	0	0	0	2	0	3	0	1	1	0	6	6	3	#NULL!	5	3	#NULL!	5	5
2	22	8	1	1	1	4	1	1	1	1	1	1	1	6	4	3	3	3	1	3	3	2	0	0	0	0	0	0	0	0	1	0	0	2	0	3	0	1	1	0	6	6	6	6	6	6	#NULL!	5	4
2	29	8	2	1	1	2	1	4	5	1	1	1	4	5	3	3	3	3	3	3	3	3	0	0	0	1	0	0	0	1	1	0	0	1	0	3	1	1	1	1	3	2	6	6	6	3	2	4	4
1	29	7	4	1	1	1	1	5	1	3	1	2	2	2	3	3	3	3	3	3	3	3	0	0	1	0	0	1	0	1	1	0	1	2	1	3	0	1	1	1	2	6	4	6	5	5	5	4	4
2	35	1	2	4	1	1	1	5	5	5	5	5	5	5	1	1	1	1	1	1	1	1	0	0	0	0	0	0	0	0	0	0	0	2	0	1	1	0	1	1	2	2	2	2	2	2	2	1	1
2	32	3	2	4	1	3	1	5	2	1	6	4	1	6	3	1	3	3	2	3	3	2	0	0	0	0	0	0	0	0	0	0	0	1	0	1	1	0	1	0	2	5	6	#NULL!	3	6	#NULL!	4	1
1	18	4	1	4	2	4	1	2	1	1	6	2	1	6	3	3	3	3	2	2	3	3	1	0	0	0	0	0	0	0	0	0	0	2	1	2	0	0	0	0	5	6	6	#NULL!	5	6	#NULL!	4	4
2	35	7	2	4	1	3	1	1	1	2	6	3	4	6	4	3	3	3	2	3	3	3	0	0	0	0	0	0	0	0	1	0	0	2	0	3	1	0	1	0	6	6	5	#NULL!	4	3	#NULL!	5	4
2	31	3	2	4	1	3	1	6	1	1	6	6	4	6	-1	-1	2	4	2	4	3	-1	0	0	0	0	0	0	0	0	0	0	0	2	0	1	1	0	1	0	#NULL!	6	6	#NULL!	#NULL!	3	#NULL!	3	3
1	33	5	2	4	3	1	1	3	3	1	1	3	2	6	4	4	4	4	4	4	4	4	0	0	0	0	0	0	0	0	0	0	0	2	1	2	1	0	0	1	4	4	6	6	4	5	#NULL!	5	5
1	31	3	4	4	2	2	1	3	1	6	6	6	4	6	4	3	3	3	2	3	3	1	0	0	0	0	0	0	0	0	0	0	0	2	1	1	0	0	0	1	4	6	#NULL!	#NULL!	#NULL!	3	#NULL!	5	4
2	30	5	2	4	1	3	1	1	1	1	6	6	1	6	3	3	3	3	2	3	3	3	0	0	0	0	0	0	0	0	0	0	0	2	0	2	1	0	1	0	6	6	6	#NULL!	#NULL!	6	#NULL!	4	4
2	21	5	1	2	1	2	1	6	1	1	2	6	2	6	4	4	4	4	2	2	2	2	0	0	0	0	0	0	0	0	1	0	0	1	0	2	0	1	1	1	#NULL!	6	6	5	#NULL!	5	#NULL!	5	5
2	19	8	1	2	2	4	1	1	1	1	6	2	2	6	3	3	3	4	2	2	4	4	1	0	0	0	0	0	0	0	1	0	0	2	0	3	0	1	0	0	6	6	6	#NULL!	5	5	#NULL!	4	4
2	20	8	1	2	3	4	1	1	1	1	6	2	3	6	4	4	4	3	3	3	3	3	0	0	0	0	0	0	0	0	0	0	0	2	0	3	0	1	0	0	6	6	6	#NULL!	5	4	#NULL!	5	5
2	20	4	1	2	1	4	1	3	2	2	6	6	2	6	3	3	4	4	3	3	3	3	0	0	0	0	0	0	0	0	0	0	0	2	0	2	0	1	1	0	4	5	5	#NULL!	#NULL!	5	#NULL!	4	4
2	23	8	1	2	1	3	1	2	2	1	6	1	2	6	4	3	4	4	2	2	3	2	0	0	0	0	0	0	0	0	0	0	0	2	0	3	0	1	1	0	5	5	6	#NULL!	6	5	#NULL!	5	4
1	21	3	1	4	1	3	1	2	1	1	6	3	3	6	4	2	3	3	3	3	3	3	1	0	0	0	0	0	0	0	0	0	0	2	1	1	0	0	1	0	5	6	6	#NULL!	4	4	#NULL!	5	2
1	34	7	2	4	3	1	1	1	4	3	1	5	4	6	4	3	3	3	3	2	3	-1	0	0	0	0	0	0	0	0	0	0	0	1	1	3	1	0	0	1	6	3	4	6	2	3	#NULL!	5	4
2	34	2	2	4	1	1	1	4	1	1	4	6	5	6	3	4	3	3	3	3	3	3	0	0	0	0	0	0	0	0	0	0	0	2	0	1	1	0	1	1	3	6	6	3	#NULL!	2	#NULL!	4	5
2	26	3	2	4	3	3	1	2	2	1	6	6	2	6	3	3	3	3	3	3	3	3	0	0	0	0	0	0	0	0	0	0	0	2	0	1	1	0	0	0	5	5	6	#NULL!	#NULL!	5	#NULL!	4	4
1	20	5	6	4	3	2	1	5	2	1	6	6	2	6	3	3	3	2	3	2	2	2	0	0	0	0	0	0	0	0	0	0	0	2	1	2	1	0	0	1	2	5	6	#NULL!	#NULL!	5	#NULL!	4	4
2	34	9	2	1	3	1	1	1	1	1	1	1	2	6	4	4	4	3	3	3	3	3	1	1	1	1	1	0	0	0	0	0	0	2	0	3	1	1	0	1	6	6	6	6	6	5	#NULL!	5	5
1	20	7	1	2	3	4	1	1	1	2	6	2	4	6	4	4	4	4	3	3	4	4	0	0	0	1	0	0	0	1	0	0	0	1	1	3	0	1	0	0	6	6	5	#NULL!	5	3	#NULL!	5	5
2	31	8	2	1	1	1	1	5	2	1	6	2	2	2	3	3	3	3	3	3	3	3	0	0	0	0	0	0	0	0	0	0	0	2	0	3	1	1	1	1	2	5	6	#NULL!	5	5	5	4	4
2	31	3	2	4	1	3	1	2	2	2	1	4	2	6	3	3	3	2	3	3	3	3	0	0	0	0	0	0	0	0	0	0	0	2	0	1	1	0	1	0	5	5	5	6	3	5	#NULL!	4	4
1	24	4	2	2	1	1	1	2	1	3	1	2	2	6	4	4	4	4	3	3	2	2	0	0	0	0	0	0	0	0	0	0	0	2	1	2	1	1	1	1	5	6	4	6	5	5	#NULL!	5	5
1	20	7	1	4	3	4	1	1	1	1	6	1	4	6	3	3	3	3	3	3	3	3	0	0	0	0	0	0	0	0	0	0	0	2	1	3	0	0	0	0	6	6	6	#NULL!	6	3	#NULL!	4	4
2	34	4	2	4	1	3	1	3	2	1	6	4	4	6	3	3	3	4	3	3	3	3	0	0	0	0	0	0	0	0	0	0	0	2	0	2	1	0	1	0	4	5	6	#NULL!	3	3	#NULL!	4	4
1	28	9	1	1	3	1	1	1	1	1	1	1	1	1	4	2	3	3	4	4	3	2	0	0	0	0	0	0	0	0	0	0	0	2	1	3	0	1	0	1	6	6	6	6	6	6	6	5	2
1	35	3	1	4	1	3	1	3	6	1	6	6	4	6	-1	-1	3	3	3	3	3	3	0	0	0	0	0	0	0	0	0	0	0	2	1	1	0	0	1	0	4	#NULL!	6	#NULL!	#NULL!	3	#NULL!	3	3
2	25	7	2	4	1	1	1	3	5	2	6	2	3	6	3	3	3	3	3	2	3	2	0	0	0	0	0	0	0	0	0	0	0	2	0	3	1	0	1	1	4	2	5	#NULL!	5	4	#NULL!	4	4
1	35	3	2	4	1	1	1	3	4	1	6	6	4	6	1	2	3	1	4	3	2	1	0	0	0	0	0	0	0	0	0	0	0	2	1	1	1	0	1	1	4	3	6	#NULL!	#NULL!	3	#NULL!	1	2
2	22	3	2	4	1	3	1	1	1	1	2	1	2	6	3	2	2	2	2	1	2	2	0	1	0	0	0	0	0	0	0	0	0	2	0	1	1	0	1	0	6	6	6	5	6	5	#NULL!	4	2
2	26	3	2	4	1	3	1	4	4	3	4	3	4	6	4	4	4	4	4	4	4	4	0	0	0	0	0	0	0	0	0	0	0	1	0	1	1	0	1	0	3	3	4	3	4	3	#NULL!	5	5
1	28	3	2	4	3	1	1	1	1	1	6	6	4	6	3	1	2	2	2	1	2	2	0	0	0	0	0	0	0	0	0	0	0	1	1	1	1	0	0	1	6	6	6	#NULL!	#NULL!	3	#NULL!	4	1
1	28	3	2	4	1	1	1	1	1	1	6	6	2	6	4	4	4	3	2	3	3	3	0	0	0	0	0	0	0	0	0	0	0	1	1	1	1	0	1	1	6	6	6	#NULL!	#NULL!	5	#NULL!	5	5
2	18	3	6	4	1	3	1	5	2	1	4	6	3	6	4	3	3	4	3	3	4	4	0	0	0	0	0	0	0	0	0	0	0	2	0	1	1	0	1	0	2	5	6	3	#NULL!	4	#NULL!	5	4
1	30	6	1	4	1	1	1	2	1	1	3	6	3	6	4	3	4	4	3	3	4	3	0	0	0	0	0	0	0	0	0	0	0	2	1	2	0	0	1	1	5	6	6	4	#NULL!	4	#NULL!	5	4
2	26	2	2	4	1	3	1	1	1	1	6	6	2	6	3	2	3	2	3	2	3	2	0	0	0	0	0	0	0	0	0	0	0	2	0	1	1	0	1	0	6	6	6	#NULL!	#NULL!	5	#NULL!	4	2
1	34	7	2	1	1	1	1	3	1	1	6	4	4	6	1	3	2	3	4	-1	3	3	0	0	0	0	0	0	0	1	1	0	0	1	1	3	1	1	1	1	4	6	6	#NULL!	3	3	#NULL!	1	4
1	29	7	2	4	3	1	1	3	2	1	6	6	2	6	3	3	2	3	1	1	3	2	0	0	0	0	0	0	0	0	0	0	0	2	1	3	1	0	0	1	4	5	6	#NULL!	#NULL!	5	#NULL!	4	4
1	29	3	1	4	1	2	1	4	1	1	1	6	4	6	4	3	3	3	3	3	3	3	1	0	0	0	0	0	1	1	1	0	0	1	1	1	0	0	1	1	3	6	6	6	#NULL!	3	#NULL!	5	4
1	20	3	1	4	1	3	1	3	1	1	1	5	4	6	3	3	3	3	3	3	3	3	0	0	0	0	0	0	0	0	1	0	0	2	1	1	0	0	1	0	4	6	6	6	2	3	#NULL!	4	4
2	33	3	2	4	1	3	1	3	3	1	6	6	4	6	4	4	4	4	2	2	4	4	0	0	0	0	0	0	0	0	0	0	0	1	0	1	1	0	1	0	4	4	6	#NULL!	#NULL!	3	#NULL!	5	5
1	27	7	1	4	3	1	1	2	6	2	3	3	2	2	4	3	4	3	3	3	3	3	0	0	0	0	0	0	0	0	0	0	0	2	1	3	0	0	0	1	5	#NULL!	5	4	4	5	5	5	4
1	32	7	2	4	1	1	1	1	1	1	1	3	4	6	3	3	3	3	3	3	3	3	1	0	0	0	0	0	0	0	0	0	0	2	1	3	1	0	1	1	6	6	6	6	4	3	#NULL!	4	4
2	26	8	1	4	3	1	1	1	1	6	1	5	2	3	3	2	3	3	2	2	2	2	0	1	1	0	0	0	0	0	0	0	0	2	0	3	0	0	0	1	6	6	#NULL!	6	2	5	4	4	2
2	32	3	2	4	1	2	1	3	1	4	1	5	1	6	3	1	1	2	2	2	3	2	0	0	0	0	0	0	0	0	0	0	0	1	0	1	1	0	1	1	4	6	3	6	2	6	#NULL!	4	1
2	35	5	3	4	1	1	1	4	1	2	6	4	3	6	3	2	3	2	3	3	3	2	0	0	0	0	0	0	0	0	0	0	0	2	0	2	1	0	1	1	3	6	5	#NULL!	3	4	#NULL!	4	2
1	18	8	1	4	3	4	1	4	4	4	6	4	6	6	3	4	4	4	3	2	4	3	0	0	0	0	0	0	0	0	0	0	0	2	1	3	0	0	0	0	3	3	3	#NULL!	3	#NULL!	#NULL!	4	5
2	20	8	1	2	2	4	1	2	1	1	3	1	2	3	2	3	3	3	2	2	3	3	1	0	0	0	0	0	0	0	1	1	0	2	0	3	0	1	0	0	5	6	6	4	6	5	4	2	4
2	20	7	1	4	1	4	1	3	2	2	5	3	5	6	3	2	3	3	2	3	3	3	1	0	0	1	0	0	0	0	0	0	0	2	0	3	0	0	1	0	4	5	5	2	4	2	#NULL!	4	2
2	20	7	1	2	1	4	1	1	3	2	6	2	4	6	4	4	4	4	3	3	3	3	0	0	0	0	0	0	0	0	0	0	0	2	0	3	0	1	1	0	6	4	5	#NULL!	5	3	#NULL!	5	5
1	21	8	1	4	2	4	1	1	1	1	6	4	3	6	4	4	3	3	3	3	3	4	0	0	0	0	0	0	0	0	0	0	0	2	1	3	0	0	0	0	6	6	6	#NULL!	3	4	#NULL!	5	5
2	20	8	1	2	2	4	1	1	1	1	6	1	3	6	4	3	3	3	3	3	3	3	0	0	0	1	0	0	0	0	0	0	0	2	0	3	0	1	0	0	6	6	6	#NULL!	6	4	#NULL!	5	4
1	29	3	4	4	1	3	1	1	3	1	6	6	6	6	4	4	4	4	4	2	2	4	0	1	0	0	0	0	0	0	0	0	0	1	1	1	0	0	1	0	6	4	6	#NULL!	#NULL!	#NULL!	#NULL!	5	5
1	21	8	1	2	1	4	1	1	1	1	6	4	4	6	3	3	3	3	3	2	4	3	0	0	0	0	0	0	0	0	0	0	0	2	1	3	0	1	1	0	6	6	6	#NULL!	3	3	#NULL!	4	4
1	25	8	1	4	1	1	1	1	3	1	6	3	4	6	4	4	4	4	3	1	3	2	1	0	0	0	0	0	0	0	0	0	0	2	1	3	0	0	1	1	6	4	6	#NULL!	4	3	#NULL!	5	5
2	30	3	2	4	1	1	1	5	1	1	6	5	4	6	3	3	3	2	3	3	2	1	1	0	0	0	0	0	0	0	0	0	0	2	0	1	1	0	1	1	2	6	6	#NULL!	2	3	#NULL!	4	4
1	32	4	2	4	1	3	1	2	1	1	5	6	1	6	3	2	3	3	3	3	3	3	1	0	0	0	0	0	0	0	0	0	0	1	1	2	1	0	1	0	5	6	6	2	#NULL!	6	#NULL!	4	2
2	35	2	2	4	1	3	1	4	4	1	6	6	2	6	3	3	3	3	3	3	3	3	0	0	0	0	0	0	0	0	0	0	0	2	0	1	1	0	1	0	3	3	6	#NULL!	#NULL!	5	#NULL!	4	4
2	20	4	1	2	2	4	1	2	1	1	6	6	2	6	4	4	4	3	3	3	4	3	0	0	0	0	0	0	0	0	0	0	0	2	0	2	0	1	0	0	5	6	6	#NULL!	#NULL!	5	#NULL!	5	5
2	19	8	1	2	1	4	1	6	2	1	3	2	2	6	3	3	3	3	3	3	3	3	0	0	0	0	0	0	0	0	0	0	0	2	0	3	0	1	1	0	#NULL!	5	6	4	5	5	#NULL!	4	4
2	33	7	2	4	1	3	1	1	1	1	6	5	3	6	3	3	3	3	3	3	3	3	0	0	0	0	0	0	0	0	0	0	0	1	0	3	1	0	1	0	6	6	6	#NULL!	2	4	#NULL!	4	4
2	24	8	1	2	1	1	1	2	3	1	6	2	2	6	3	3	3	3	3	3	3	3	0	0	0	0	0	0	0	0	0	0	0	2	0	3	0	1	1	1	5	4	6	#NULL!	5	5	#NULL!	4	4
2	25	8	1	1	1	2	1	1	1	1	1	2	2	6	4	4	4	4	4	4	4	4	0	0	0	0	0	0	0	0	0	0	0	2	0	3	0	1	1	1	6	6	6	6	5	5	#NULL!	5	5
2	27	5	2	4	2	3	1	6	1	6	6	6	4	6	4	3	3	3	2	3	4	2	0	0	0	0	0	0	0	0	0	0	0	2	0	2	1	0	0	0	#NULL!	6	#NULL!	#NULL!	#NULL!	3	#NULL!	5	4
1	21	8	1	2	2	4	1	1	3	1	6	1	4	6	3	3	3	3	3	3	3	3	0	0	0	0	0	0	0	0	0	0	0	2	1	3	0	1	0	0	6	4	6	#NULL!	6	3	#NULL!	4	4
1	26	6	1	4	2	2	1	2	1	2	6	6	5	6	3	3	3	3	3	3	3	3	0	0	0	0	0	0	0	0	0	0	0	2	1	2	0	0	0	1	5	6	5	#NULL!	#NULL!	2	#NULL!	4	4
2	30	3	3	4	1	3	1	6	1	1	6	6	4	6	3	3	4	4	4	2	2	2	0	0	0	0	0	0	0	0	0	0	0	2	0	1	1	0	1	0	#NULL!	6	6	#NULL!	#NULL!	3	#NULL!	4	4
1	35	8	2	4	2	3	1	1	1	1	6	6	5	6	4	3	4	3	2	2	4	3	0	0	0	0	0	0	0	0	0	0	0	2	1	3	1	0	0	0	6	6	6	#NULL!	#NULL!	2	#NULL!	5	4
1	30	7	1	4	1	1	1	1	1	1	6	2	4	6	4	4	4	4	3	4	4	4	0	0	0	0	0	0	0	0	0	0	0	1	1	3	0	0	1	1	6	6	6	#NULL!	5	3	#NULL!	5	5
2	34	4	2	4	1	1	1	3	6	3	6	6	4	6	3	3	3	3	2	2	-1	2	0	0	0	0	0	0	0	0	0	0	0	2	0	2	1	0	1	1	4	#NULL!	4	#NULL!	#NULL!	3	#NULL!	4	4
1	20	8	1	2	3	4	1	3	2	2	6	2	4	6	3	4	4	4	3	3	3	3	0	0	0	0	0	0	0	0	1	0	0	1	1	3	0	1	0	0	4	5	5	#NULL!	5	3	#NULL!	4	5
2	32	2	2	4	1	1	1	5	1	6	6	6	6	6	2	3	2	3	4	3	2	2	0	0	0	0	0	0	0	0	0	0	0	2	0	1	1	0	1	1	2	6	#NULL!	#NULL!	#NULL!	#NULL!	#NULL!	2	4
1	18	4	1	4	1	4	1	1	1	1	6	2	2	6	4	4	3	4	3	3	4	3	1	0	0	0	0	0	0	0	0	0	0	2	1	2	0	0	1	0	6	6	6	#NULL!	5	5	#NULL!	5	5
1	24	5	1	2	1	1	1	1	2	3	6	3	3	6	4	4	4	4	3	3	4	4	1	0	0	0	0	0	0	0	0	0	0	2	1	2	0	1	1	1	6	5	4	#NULL!	4	4	#NULL!	5	5
1	25	3	2	4	3	1	1	6	1	1	6	6	3	6	2	2	2	3	3	2	2	1	0	0	0	0	0	0	0	0	0	0	0	2	1	1	1	0	0	1	#NULL!	6	6	#NULL!	#NULL!	4	#NULL!	2	2
2	33	3	2	4	1	3	1	3	4	1	6	6	4	6	3	3	3	3	3	2	2	3	0	0	0	0	0	0	0	0	0	0	0	1	0	1	1	0	1	0	4	3	6	#NULL!	#NULL!	3	#NULL!	4	4
1	34	3	3	1	3	1	1	2	5	6	6	5	5	6	3	3	2	2	3	3	3	3	0	0	0	0	0	1	0	0	0	0	0	1	1	1	1	1	0	1	5	2	#NULL!	#NULL!	2	2	#NULL!	4	4
2	24	5	1	2	1	3	1	2	1	1	6	6	2	6	3	3	3	3	3	3	3	3	0	0	0	0	0	0	0	0	0	0	0	2	0	2	0	1	1	0	5	6	6	#NULL!	#NULL!	5	#NULL!	4	4
1	29	3	2	4	1	1	1	4	1	1	1	2	4	6	3	3	3	3	3	3	3	3	0	0	0	0	0	0	0	1	1	0	0	2	1	1	1	0	1	1	3	6	6	6	5	3	#NULL!	4	4
2	31	3	2	4	1	2	1	1	1	1	2	2	4	6	3	3	3	3	2	2	3	3	0	0	0	0	0	0	1	1	0	0	0	1	0	1	1	0	1	1	6	6	6	5	5	3	#NULL!	4	4
2	30	5	2	4	1	1	1	3	2	2	1	2	3	6	3	3	3	3	3	2	3	2	0	0	0	0	0	0	0	0	0	0	0	2	0	2	1	0	1	1	4	5	5	6	5	4	#NULL!	4	4
2	27	8	1	1	1	1	1	1	1	1	1	1	1	6	4	3	4	3	3	2	3	1	1	0	0	0	0	0	0	0	0	0	0	2	0	3	0	1	1	1	6	6	6	6	6	6	#NULL!	5	4
1	28	4	1	2	2	1	1	4	1	1	6	4	4	6	4	3	3	3	2	3	3	3	0	0	0	0	0	0	0	1	0	0	0	1	1	2	0	1	0	1	3	6	6	#NULL!	3	3	#NULL!	5	4
2	21	8	1	2	2	4	1	1	5	1	4	5	5	6	4	2	3	3	2	3	3	3	0	0	0	0	0	0	0	0	0	0	0	2	0	3	0	1	0	0	6	2	6	3	2	2	#NULL!	5	2
1	20	8	1	1	3	4	1	4	1	1	6	2	3	6	4	4	4	4	3	3	3	3	1	0	0	0	0	0	0	0	0	0	0	2	1	3	0	1	0	0	3	6	6	#NULL!	5	4	#NULL!	5	5
2	34	4	2	4	1	3	1	6	1	1	6	6	3	6	-1	-1	-1	3	-1	3	3	3	0	0	0	0	0	0	0	0	0	0	0	2	0	2	1	0	1	0	#NULL!	6	6	#NULL!	#NULL!	4	#NULL!	3	3
1	24	8	1	1	2	2	1	1	1	1	6	1	3	6	4	4	4	3	4	3	3	3	0	0	0	0	0	0	0	0	0	0	0	2	1	3	0	1	0	1	6	6	6	#NULL!	6	4	#NULL!	5	5
1	25	5	1	2	1	3	1	1	1	1	3	4	3	6	3	4	4	3	3	3	3	3	1	0	0	0	0	0	0	1	0	0	0	1	1	2	0	1	1	0	6	6	6	4	3	4	#NULL!	4	5
1	20	6	1	4	2	1	1	1	1	1	6	6	6	6	3	3	3	3	3	3	3	3	1	0	0	0	0	0	0	0	0	0	0	2	1	2	0	0	0	1	6	6	6	#NULL!	#NULL!	#NULL!	#NULL!	4	4
1	19	8	1	2	2	4	1	1	1	1	6	1	3	6	3	2	3	2	2	2	2	2	1	0	0	0	0	0	0	0	0	0	0	2	1	3	0	1	0	0	6	6	6	#NULL!	6	4	#NULL!	4	2
1	20	8	1	4	2	4	1	2	2	1	1	2	2	6	3	3	3	3	3	3	3	3	1	0	0	0	0	0	0	0	0	0	0	2	1	3	0	0	0	0	5	5	6	6	5	5	#NULL!	4	4
2	24	8	1	2	1	1	1	1	1	1	5	2	3	6	3	4	3	3	3	3	3	2	1	0	0	0	0	0	0	0	0	0	0	2	0	3	0	1	1	1	6	6	6	2	5	4	#NULL!	4	5
1	19	8	1	4	2	4	1	2	1	1	3	1	2	6	3	3	2	3	3	3	3	3	1	0	0	0	0	0	0	0	0	0	0	2	1	3	0	0	0	0	5	6	6	4	6	5	#NULL!	4	4
2	35	5	2	4	1	1	1	3	1	2	1	3	1	6	3	1	3	3	3	3	3	2	0	0	0	0	0	0	0	1	0	0	0	1	0	2	1	0	1	1	4	6	5	6	4	6	#NULL!	4	1
1	22	8	1	2	2	4	1	2	3	2	6	3	3	6	4	4	3	4	4	2	3	3	0	0	1	0	0	0	0	0	0	0	0	2	1	3	0	1	0	0	5	4	5	#NULL!	4	4	#NULL!	5	5
1	19	8	1	4	2	4	1	2	1	1	6	3	4	6	3	2	3	2	2	1	3	3	1	0	1	0	0	0	0	0	0	0	0	2	1	3	0	0	0	0	5	6	6	#NULL!	4	3	#NULL!	4	2
1	33	9	1	1	3	1	1	1	4	1	1	4	4	6	4	3	4	4	4	4	3	3	1	0	0	0	0	0	0	0	0	0	0	2	1	3	0	1	0	1	6	3	6	6	3	3	#NULL!	5	4
1	28	8	1	4	1	1	1	1	1	1	1	1	1	1	3	3	3	3	3	3	3	3	0	0	0	0	0	0	0	0	0	0	0	2	1	3	0	0	1	1	6	6	6	6	6	6	6	4	4
1	35	8	2	4	3	1	1	3	1	1	6	6	5	6	4	4	4	4	2	3	3	3	0	0	0	0	0	0	0	0	0	0	0	2	1	3	1	0	0	1	4	6	6	#NULL!	#NULL!	2	#NULL!	5	5
2	29	8	2	4	2	1	1	1	1	1	6	1	2	6	3	3	3	3	3	3	3	3	0	0	0	0	0	0	0	0	1	0	0	1	0	3	1	0	0	1	6	6	6	#NULL!	6	5	#NULL!	4	4
1	24	6	2	4	1	2	1	2	1	1	1	3	1	1	3	3	3	3	3	3	3	3	0	0	0	0	0	0	0	0	0	0	0	1	1	2	1	0	1	1	5	6	6	6	4	6	6	4	4
1	18	4	1	4	1	4	1	3	1	1	6	6	2	6	4	4	3	3	2	3	3	2	0	0	0	0	0	0	0	0	0	1	0	2	1	2	0	0	1	0	4	6	6	#NULL!	#NULL!	5	#NULL!	5	5
1	18	4	1	4	2	4	1	2	2	2	6	1	3	6	3	3	3	3	3	3	3	3	0	0	0	0	0	0	0	0	0	0	0	2	1	2	0	0	0	0	5	5	5	#NULL!	6	4	#NULL!	4	4
2	35	7	2	4	3	2	1	1	1	1	1	1	3	6	2	3	3	3	2	3	2	2	1	0	0	0	0	0	0	0	0	0	0	2	0	3	1	0	0	1	6	6	6	6	6	4	#NULL!	2	4
1	26	8	1	4	1	1	1	3	1	2	6	6	3	6	4	3	3	3	3	3	3	3	0	0	0	0	0	0	0	0	0	0	0	2	1	3	0	0	1	1	4	6	5	#NULL!	#NULL!	4	#NULL!	5	4
2	20	8	1	2	2	4	1	1	1	1	5	1	1	5	3	3	3	3	3	3	3	3	0	0	0	0	0	0	0	0	0	0	0	2	0	3	0	1	0	0	6	6	6	2	6	6	2	4	4
2	29	8	1	4	1	1	1	6	1	1	2	3	1	6	3	3	3	3	3	3	3	3	0	0	0	0	0	0	0	0	0	0	0	1	0	3	0	0	1	1	#NULL!	6	6	5	4	6	#NULL!	4	4
2	26	3	2	4	1	3	1	3	1	1	6	3	3	6	3	3	3	3	3	3	3	3	0	0	0	0	0	0	0	0	0	0	0	2	0	1	1	0	1	0	4	6	6	#NULL!	4	4	#NULL!	4	4
1	23	4	1	2	3	1	1	1	1	1	1	6	1	3	4	2	2	4	2	3	4	4	0	0	0	0	0	0	0	0	0	0	0	2	1	2	0	1	0	1	6	6	6	6	#NULL!	6	4	5	2
1	19	8	1	4	2	4	1	3	1	1	2	3	4	6	4	3	4	4	3	3	3	3	1	0	1	0	0	0	0	0	1	0	0	2	1	3	0	0	0	0	4	6	6	5	4	3	#NULL!	5	4
1	32	3	2	4	1	1	1	6	1	1	6	6	2	6	2	2	2	3	3	3	3	1	1	0	0	0	0	0	0	0	0	0	0	1	1	1	1	0	1	1	#NULL!	6	6	#NULL!	#NULL!	5	#NULL!	2	2
1	20	8	1	2	1	4	1	1	1	1	6	1	4	6	4	4	3	3	2	3	3	4	1	0	0	0	1	0	0	0	1	0	0	2	1	3	0	1	1	0	6	6	6	#NULL!	6	3	#NULL!	5	5
1	27	7	1	4	1	3	1	2	2	5	6	4	4	6	3	3	3	3	3	3	3	3	0	0	0	0	0	0	0	0	0	0	0	1	1	3	0	0	1	0	5	5	2	#NULL!	3	3	#NULL!	4	4
1	22	2	1	4	1	3	1	4	3	1	4	5	1	6	3	3	3	3	4	3	4	3	0	0	0	0	0	0	0	0	0	0	0	2	1	1	0	0	1	0	3	4	6	3	2	6	#NULL!	4	4
2	31	7	2	4	3	2	1	2	1	1	6	3	3	6	4	4	3	3	2	2	3	3	0	0	0	1	0	0	0	1	0	0	0	2	0	3	1	0	0	1	5	6	6	#NULL!	4	4	#NULL!	5	5
1	30	7	2	4	2	3	1	1	1	1	6	1	2	1	3	3	3	3	3	2	3	2	0	0	0	0	0	0	0	0	0	0	0	2	1	3	1	0	0	0	6	6	6	#NULL!	6	5	6	4	4
1	20	7	1	4	1	4	1	2	1	2	6	4	4	6	4	3	3	3	3	3	3	3	1	0	0	0	0	0	0	0	0	1	0	1	1	3	0	0	1	0	5	6	5	#NULL!	3	3	#NULL!	5	4
2	26	2	2	4	1	3	1	3	2	1	6	6	4	6	4	4	4	4	3	4	4	4	0	0	0	0	0	1	0	0	0	0	0	1	0	1	1	0	1	0	4	5	6	#NULL!	#NULL!	3	#NULL!	5	5
2	22	8	1	2	2	3	1	2	2	2	2	2	2	6	3	3	3	3	3	3	3	3	1	1	0	0	0	0	0	0	0	0	0	2	0	3	0	1	0	0	5	5	5	5	5	5	#NULL!	4	4
2	19	8	1	2	1	4	1	2	1	1	6	1	4	6	4	4	4	4	3	3	4	4	0	0	0	0	0	0	0	0	0	0	0	2	0	3	0	1	1	0	5	6	6	#NULL!	6	3	#NULL!	5	5
2	33	3	3	4	1	3	1	2	1	1	6	2	4	6	3	4	4	4	3	3	3	3	0	0	0	0	0	0	0	0	0	0	0	2	0	1	1	0	1	0	5	6	6	#NULL!	5	3	#NULL!	4	5
1	35	7	1	4	1	1	1	1	2	2	3	1	5	6	3	1	3	3	3	-1	3	3	1	0	1	0	1	1	1	0	1	0	0	2	1	3	0	0	1	1	6	5	5	4	6	2	#NULL!	4	1
2	34	3	2	4	1	2	1	2	2	3	1	3	2	6	4	3	3	3	3	3	3	3	0	0	0	0	0	0	0	0	0	0	0	2	0	1	1	0	1	1	5	5	4	6	4	5	#NULL!	5	4
2	26	5	2	4	1	3	1	3	1	1	6	3	4	6	3	3	4	4	3	3	3	3	0	0	0	0	0	1	0	0	0	0	0	1	0	2	1	0	1	0	4	6	6	#NULL!	4	3	#NULL!	4	4
2	33	8	2	4	2	1	1	3	6	1	6	4	4	6	3	3	-1	3	2	2	-1	2	0	0	0	0	0	0	0	0	0	0	0	2	0	3	1	0	0	1	4	#NULL!	6	#NULL!	3	3	#NULL!	4	4
1	26	3	4	4	1	1	1	6	1	1	6	6	5	6	-1	4	4	4	-1	-1	3	3	0	0	0	0	0	0	0	0	0	0	0	1	1	1	0	0	1	1	#NULL!	6	6	#NULL!	#NULL!	2	#NULL!	3	5
2	25	3	2	4	3	3	1	3	1	1	1	1	3	6	1	1	1	3	2	2	1	1	0	0	0	0	0	0	0	0	0	0	0	1	0	1	1	0	0	0	4	6	6	6	6	4	#NULL!	1	1
2	19	4	1	4	1	4	1	4	1	1	1	1	4	6	2	3	3	3	3	3	3	3	0	0	0	0	0	0	0	0	0	0	0	2	0	2	0	0	1	0	3	6	6	6	6	3	#NULL!	2	4
1	20	6	2	4	3	1	1	4	2	3	6	6	6	6	3	3	3	3	3	3	3	3	0	0	0	0	0	0	0	0	0	0	0	2	1	2	1	0	0	1	3	5	4	#NULL!	#NULL!	#NULL!	#NULL!	4	4
1	20	4	1	2	2	4	1	1	1	1	6	1	2	6	3	3	3	3	3	3	3	2	0	0	0	0	0	0	0	0	0	0	0	2	1	2	0	1	0	0	6	6	6	#NULL!	6	5	#NULL!	4	4
2	20	8	1	2	2	4	1	3	1	1	6	1	1	6	4	3	3	3	2	3	3	3	0	0	0	0	0	0	0	0	0	0	0	2	0	3	0	1	0	0	4	6	6	#NULL!	6	6	#NULL!	5	4
2	28	8	2	4	2	1	1	1	1	1	2	2	3	4	3	4	4	3	3	3	3	3	0	0	0	0	0	0	0	0	0	0	0	2	0	3	1	0	0	1	6	6	6	5	5	4	3	4	5
1	26	9	1	4	2	3	1	2	1	2	5	4	2	6	4	4	4	4	2	2	3	4	0	0	0	0	0	0	0	0	0	0	0	2	1	3	0	0	0	0	5	6	5	2	3	5	#NULL!	5	5
2	21	8	1	2	1	4	1	4	1	1	6	4	4	6	4	4	4	3	2	2	3	2	0	0	0	0	0	0	0	0	0	0	0	2	0	3	0	1	1	0	3	6	6	#NULL!	3	3	#NULL!	5	5
2	33	3	2	4	1	1	1	2	2	1	1	4	2	6	3	3	3	3	3	3	3	3	0	0	0	0	0	0	0	0	0	0	0	2	0	1	1	0	1	1	5	5	6	6	3	5	#NULL!	4	4
2	20	5	1	2	1	1	1	1	1	1	6	6	1	6	4	4	4	3	3	3	3	3	0	0	0	0	0	0	0	0	0	0	0	2	0	2	0	1	1	1	6	6	6	#NULL!	#NULL!	6	#NULL!	5	5
2	24	8	1	2	2	4	1	2	1	1	6	5	2	6	3	3	3	4	3	3	3	3	0	0	0	0	0	0	0	0	0	0	0	1	0	3	0	1	0	0	5	6	6	#NULL!	2	5	#NULL!	4	4
2	19	4	1	4	1	4	1	6	2	2	6	6	4	6	3	3	4	3	3	2	3	3	0	0	0	0	0	0	0	0	0	0	0	2	0	2	0	0	1	0	#NULL!	5	5	#NULL!	#NULL!	3	#NULL!	4	4
1	24	8	1	4	1	1	1	1	2	1	6	3	4	6	4	3	3	3	3	3	3	3	0	1	0	0	0	0	0	0	0	0	0	2	1	3	0	0	1	1	6	5	6	#NULL!	4	3	#NULL!	5	4
2	24	7	2	4	2	1	1	2	2	2	2	2	2	4	3	3	3	3	3	3	3	3	0	0	0	0	0	0	0	0	1	0	0	2	0	3	1	0	0	1	5	5	5	5	5	5	3	4	4
2	25	8	1	4	2	1	1	4	2	2	1	1	1	6	4	4	4	4	4	4	4	4	0	0	0	0	0	0	0	0	0	0	0	2	0	3	0	0	0	1	3	5	5	6	6	6	#NULL!	5	5
1	23	4	1	1	3	1	1	6	1	3	3	6	2	6	4	4	4	4	4	4	4	3	0	0	0	0	0	0	0	0	0	0	0	2	1	2	0	1	0	1	#NULL!	6	4	4	#NULL!	5	#NULL!	5	5
2	32	2	2	4	1	1	1	1	1	1	6	5	3	6	3	1	2	3	2	2	3	2	1	0	1	0	0	0	0	0	1	0	0	2	0	1	1	0	1	1	6	6	6	#NULL!	2	4	#NULL!	4	1
1	21	8	1	2	1	4	1	2	1	1	3	2	3	6	3	3	3	3	3	3	3	3	1	0	0	0	0	0	0	0	0	0	0	2	1	3	0	1	1	0	5	6	6	4	5	4	#NULL!	4	4
1	25	5	1	4	1	1	1	2	1	1	2	3	3	6	4	3	3	3	3	3	3	3	0	0	0	0	0	0	0	0	0	0	0	2	1	2	0	0	1	1	5	6	6	5	4	4	#NULL!	5	4
2	30	5	2	4	1	2	1	5	1	1	5	2	1	6	3	3	3	3	3	3	3	3	0	0	0	0	0	0	0	0	0	0	0	1	0	2	1	0	1	1	2	6	6	2	5	6	#NULL!	4	4
1	24	3	2	4	1	2	1	1	2	1	6	6	3	6	3	3	3	3	3	3	3	3	0	0	0	0	0	0	0	0	0	0	0	2	1	1	1	0	1	1	6	5	6	#NULL!	#NULL!	4	#NULL!	4	4
1	33	7	2	1	1	1	1	1	1	1	1	6	1	6	3	4	-1	3	3	3	3	1	0	0	0	0	0	0	0	0	0	0	0	2	1	3	1	1	1	1	6	6	6	6	#NULL!	6	#NULL!	4	5
2	26	3	2	4	3	3	1	5	1	3	6	6	2	6	3	1	1	3	1	1	1	2	0	0	0	0	0	0	0	0	0	0	0	2	0	1	1	0	0	0	2	6	4	#NULL!	#NULL!	5	#NULL!	4	1
1	21	8	1	2	2	4	1	3	3	1	6	2	4	6	3	3	3	3	3	3	3	3	1	0	0	0	0	0	0	1	0	0	0	1	1	3	0	1	0	0	4	4	6	#NULL!	5	3	#NULL!	4	4
1	22	2	6	4	1	3	1	1	1	1	6	4	4	6	3	3	3	3	3	2	2	3	0	0	0	0	0	0	0	0	0	0	1	1	1	1	1	0	1	0	6	6	6	#NULL!	3	3	#NULL!	4	4
1	31	3	2	4	2	2	1	4	3	1	2	4	4	2	4	4	4	3	3	2	3	3	0	0	0	0	0	0	0	0	0	0	0	2	1	1	1	0	0	1	3	4	6	5	3	3	5	5	5
1	22	7	1	4	3	3	1	1	1	1	1	1	1	6	3	2	3	3	1	2	3	3	1	0	0	0	0	0	0	0	0	0	0	2	1	3	0	0	0	0	6	6	6	6	6	6	#NULL!	4	2
1	20	8	1	2	3	4	1	2	1	1	6	3	3	4	3	3	3	3	3	3	3	3	1	0	0	0	0	0	0	0	0	0	0	2	1	3	0	1	0	0	5	6	6	#NULL!	4	4	3	4	4
1	33	1	2	4	1	1	1	1	1	1	6	6	5	6	3	3	2	2	3	3	3	2	0	0	0	0	0	0	0	0	0	0	0	2	1	1	1	0	1	1	6	6	6	#NULL!	#NULL!	2	#NULL!	4	4
1	24	8	1	4	2	2	1	2	3	2	2	6	2	6	4	3	4	4	3	3	4	3	0	0	1	0	0	0	0	0	0	0	0	2	1	3	0	0	0	1	5	4	5	5	#NULL!	5	#NULL!	5	4
2	19	4	1	2	3	4	1	3	1	1	6	2	3	6	3	3	3	3	2	2	3	3	0	0	0	0	0	0	0	0	0	0	0	2	0	2	0	1	0	0	4	6	6	#NULL!	5	4	#NULL!	4	4
2	20	4	1	2	1	4	1	2	2	2	6	2	4	6	3	3	3	3	3	3	3	3	0	0	0	0	0	0	0	0	0	0	0	2	0	2	0	1	1	0	5	5	5	#NULL!	5	3	#NULL!	4	4
2	28	5	2	4	1	3	1	2	3	1	6	1	1	3	3	3	3	3	3	3	3	3	1	0	0	0	0	0	0	0	0	0	0	2	0	2	1	0	1	0	5	4	6	#NULL!	6	6	4	4	4
2	23	8	1	1	3	2	1	1	1	1	1	1	1	6	4	3	3	3	3	3	3	3	0	0	0	0	0	0	0	0	0	0	0	2	0	3	0	1	0	1	6	6	6	6	6	6	#NULL!	5	4
2	32	4	2	4	1	1	1	5	1	1	5	6	2	6	4	2	2	2	3	3	2	1	1	0	0	0	0	0	0	0	0	0	0	1	0	2	1	0	1	1	2	6	6	2	#NULL!	5	#NULL!	5	2
1	28	8	2	4	2	1	1	2	1	1	6	3	3	6	4	4	4	4	4	3	4	4	0	0	0	0	0	0	0	0	1	0	0	2	1	3	1	0	0	1	5	6	6	#NULL!	4	4	#NULL!	5	5
2	32	8	2	4	2	1	1	2	2	2	6	2	2	6	4	4	4	4	4	4	4	4	0	0	0	0	0	0	0	0	0	0	0	2	0	3	1	0	0	1	5	5	5	#NULL!	5	5	#NULL!	5	5
2	35	8	2	4	2	1	1	1	1	1	1	1	4	5	4	4	4	2	3	2	3	2	0	0	0	0	0	0	0	0	1	0	0	2	0	3	1	0	0	1	6	6	6	6	6	3	2	5	5
2	35	7	2	1	2	1	1	1	1	1	1	1	1	6	4	4	4	4	4	4	4	4	1	0	0	0	0	0	0	0	0	0	0	1	0	3	1	1	0	1	6	6	6	6	6	6	#NULL!	5	5
2	28	4	2	2	1	1	1	2	1	1	1	2	1	6	3	3	3	3	3	3	3	3	0	0	0	0	0	0	0	0	0	0	0	1	0	2	1	1	1	1	5	6	6	6	5	6	#NULL!	4	4
1	22	6	1	4	3	1	1	1	3	4	6	5	3	6	4	4	4	3	3	3	3	3	0	0	0	1	0	0	0	0	1	0	0	2	1	2	0	0	0	1	6	4	3	#NULL!	2	4	#NULL!	5	5
2	21	8	1	1	2	4	1	2	2	2	2	2	2	2	3	3	3	3	3	3	3	3	0	0	0	0	0	0	0	0	0	0	0	2	0	3	0	1	0	0	5	5	5	5	5	5	5	4	4
2	35	3	2	4	2	2	1	1	6	1	6	6	4	6	3	1	1	3	3	3	2	2	0	0	0	0	0	0	0	0	0	0	0	1	0	1	1	0	0	1	6	#NULL!	6	#NULL!	#NULL!	3	#NULL!	4	1
2	19	8	1	2	2	4	1	5	1	1	2	4	2	6	4	3	3	3	2	3	3	3	0	0	0	0	0	0	0	0	0	0	0	2	0	3	0	1	0	0	2	6	6	5	3	5	#NULL!	5	4
1	33	4	4	4	2	2	1	2	2	4	1	5	3	6	4	3	3	3	4	4	3	3	0	0	0	0	0	0	0	0	0	0	0	2	1	2	0	0	0	1	5	5	3	6	2	4	#NULL!	5	4
1	34	2	2	4	1	3	1	5	4	1	1	6	1	6	1	2	2	2	1	1	2	1	0	0	0	0	0	0	0	0	0	0	0	2	1	1	1	0	1	0	2	3	6	6	#NULL!	6	#NULL!	1	2
1	19	8	1	2	2	4	1	3	2	1	6	5	2	6	4	4	4	4	4	4	4	4	0	0	0	0	0	0	0	0	0	0	0	2	1	3	0	1	0	0	4	5	6	#NULL!	2	5	#NULL!	5	5
1	27	3	1	4	1	1	1	5	1	2	1	5	4	6	4	3	3	2	2	2	3	3	0	0	1	0	1	0	0	0	0	0	0	2	1	1	0	0	1	1	2	6	5	6	2	3	#NULL!	5	4
2	22	8	1	2	1	2	1	1	1	1	3	2	3	6	2	3	2	3	4	1	3	2	0	0	0	0	0	0	0	0	0	0	0	2	0	3	0	1	1	1	6	6	6	4	5	4	#NULL!	2	4
1	26	7	1	1	1	1	1	1	1	1	3	1	2	6	4	3	3	3	3	3	4	2	1	0	0	0	0	0	0	1	1	0	0	1	1	3	0	1	1	1	6	6	6	4	6	5	#NULL!	5	4
2	24	3	2	4	1	3	1	6	1	4	6	6	5	6	4	4	4	4	3	3	3	3	0	0	0	0	0	0	0	0	1	0	1	2	0	1	1	0	1	0	#NULL!	6	3	#NULL!	#NULL!	2	#NULL!	5	5
2	27	8	1	4	2	1	1	2	1	1	1	4	3	6	3	3	2	3	3	3	3	3	0	0	0	0	0	0	0	0	0	0	0	2	0	3	0	0	0	1	5	6	6	6	3	4	#NULL!	4	4
1	26	4	2	2	1	2	1	3	1	1	6	6	1	6	4	4	4	4	4	4	4	4	0	0	0	0	0	0	0	0	1	0	0	2	1	2	1	1	1	1	4	6	6	#NULL!	#NULL!	6	#NULL!	5	5
2	30	7	2	4	1	1	1	1	1	1	2	2	3	6	3	3	3	3	3	2	2	2	0	0	0	0	0	0	0	0	0	0	0	2	0	3	1	0	1	1	6	6	6	5	5	4	#NULL!	4	4
2	33	3	2	4	1	3	1	1	1	1	6	6	3	6	4	4	4	4	4	4	4	4	0	0	0	0	0	0	0	0	0	0	0	2	0	1	1	0	1	0	6	6	6	#NULL!	#NULL!	4	#NULL!	5	5
1	27	4	1	2	1	1	1	3	2	1	1	4	2	4	4	2	3	3	3	2	3	2	0	0	0	0	0	0	0	0	0	0	0	2	1	2	0	1	1	1	4	5	6	6	3	5	3	5	2
1	18	4	1	2	1	4	1	3	2	3	6	2	6	6	4	4	4	4	3	3	3	3	1	0	0	0	0	0	0	0	0	0	0	2	1	2	0	1	1	0	4	5	4	#NULL!	5	#NULL!	#NULL!	5	5
2	22	8	1	2	2	2	1	1	1	1	1	3	2	5	4	3	3	3	3	2	2	3	1	1	0	0	1	0	0	0	1	0	0	1	0	3	0	1	0	1	6	6	6	6	4	5	2	5	4
1	20	8	1	2	2	4	1	1	1	1	1	1	4	6	3	3	4	3	2	2	3	2	1	1	0	0	0	0	0	0	0	0	0	2	1	3	0	1	0	0	6	6	6	6	6	3	#NULL!	4	4
2	18	4	1	2	1	4	1	3	1	1	6	2	5	6	4	4	4	4	2	2	3	2	1	0	0	0	0	0	1	0	1	0	0	2	0	2	0	1	1	0	4	6	6	#NULL!	5	2	#NULL!	5	5
2	21	7	1	4	1	3	1	2	1	1	6	1	3	6	4	4	3	3	3	3	4	3	0	0	0	0	0	0	0	0	0	0	0	2	0	3	0	0	1	0	5	6	6	#NULL!	6	4	#NULL!	5	5
2	33	9	2	1	3	1	1	1	1	1	1	1	1	5	3	3	3	3	2	2	3	3	0	0	0	0	0	0	0	0	0	0	0	1	0	3	1	1	0	1	6	6	6	6	6	6	2	4	4
1	24	7	1	4	2	1	1	1	2	1	1	4	2	1	1	1	1	1	1	1	1	1	0	0	0	0	0	0	0	0	0	0	0	2	1	3	0	0	0	1	6	5	6	6	3	5	6	1	1
2	31	2	2	4	1	1	1	6	1	1	6	6	4	6	3	3	3	3	3	3	3	3	0	0	0	0	0	0	0	0	0	0	0	2	0	1	1	0	1	1	#NULL!	6	6	#NULL!	#NULL!	3	#NULL!	4	4
1	29	4	1	4	1	1	1	1	1	1	1	1	1	6	3	-1	-1	3	3	3	3	3	0	0	0	0	0	0	0	0	0	0	0	2	1	2	0	0	1	1	6	6	6	6	6	6	#NULL!	4	3
2	31	7	2	4	1	1	1	2	2	3	2	3	2	6	4	4	4	4	4	4	4	4	0	0	0	0	0	0	0	0	0	0	0	2	0	3	1	0	1	1	5	5	4	5	4	5	#NULL!	5	5
1	30	4	2	4	1	1	1	3	1	2	2	3	4	5	3	2	3	3	3	3	3	3	0	0	1	0	0	0	1	0	0	0	0	2	1	2	1	0	1	1	4	6	5	5	4	3	2	4	2
1	26	8	1	2	3	1	1	1	1	1	1	2	2	4	4	3	3	3	3	3	3	3	0	0	0	0	1	0	0	0	0	0	0	2	1	3	0	1	0	1	6	6	6	6	5	5	3	5	4
1	21	8	1	2	2	4	1	1	2	1	2	1	4	6	4	4	4	3	3	3	3	3	0	0	0	0	0	0	0	0	0	0	0	2	1	3	0	1	0	0	6	5	6	5	6	3	#NULL!	5	5
2	26	9	1	1	2	2	1	2	1	1	1	2	3	2	4	3	4	3	2	2	3	3	1	0	0	0	0	0	0	0	1	0	0	2	0	3	0	1	0	1	5	6	6	6	5	4	5	5	4
2	35	8	2	1	3	1	1	1	2	1	2	2	5	6	4	4	4	3	3	3	3	3	0	0	1	0	0	0	1	1	1	0	0	2	0	3	1	1	0	1	6	5	6	5	5	2	#NULL!	5	5
2	35	8	2	1	2	2	1	1	1	3	6	1	3	6	4	3	3	3	2	2	3	3	0	0	0	0	0	0	0	0	0	0	0	2	0	3	1	1	0	1	6	6	4	#NULL!	6	4	#NULL!	5	4
2	25	9	2	1	1	2	1	1	1	1	1	1	3	6	4	4	4	3	3	3	3	3	0	0	0	0	0	0	0	0	0	0	0	2	0	3	1	1	1	1	6	6	6	6	6	4	#NULL!	5	5
2	29	4	2	4	1	3	1	3	3	1	5	1	1	6	3	3	3	2	3	3	3	2	0	0	0	0	0	0	0	0	0	0	0	1	0	2	1	0	1	0	4	4	6	2	6	6	#NULL!	4	4
2	27	3	2	4	1	3	1	2	1	2	6	6	2	6	3	3	3	3	3	3	3	3	0	0	0	0	0	0	0	0	0	0	0	2	0	1	1	0	1	0	5	6	5	#NULL!	#NULL!	5	#NULL!	4	4
2	33	7	2	4	2	3	1	1	1	1	6	3	3	2	4	2	2	2	2	2	2	2	0	0	0	0	0	0	0	0	0	0	0	2	0	3	1	0	0	0	6	6	6	#NULL!	4	4	5	5	2
1	18	4	1	2	1	4	1	2	6	6	3	2	6	2	4	3	3	3	3	3	3	3	0	0	0	0	0	0	0	0	0	0	0	2	1	2	0	1	1	0	5	#NULL!	#NULL!	4	5	#NULL!	5	5	4
1	25	3	1	4	1	1	1	3	5	1	6	6	5	6	3	3	3	3	3	3	3	3	0	0	0	0	0	0	0	0	0	0	0	1	1	1	0	0	1	1	4	2	6	#NULL!	#NULL!	2	#NULL!	4	4
1	34	4	2	4	1	1	1	1	5	1	6	6	4	6	3	3	4	4	3	3	4	3	0	0	0	0	0	0	0	0	0	0	0	2	1	2	1	0	1	1	6	2	6	#NULL!	#NULL!	3	#NULL!	4	4
2	29	2	3	4	1	3	1	2	3	1	6	6	4	6	3	3	4	3	3	2	2	2	0	0	0	0	0	0	0	1	0	1	0	1	0	1	1	0	1	0	5	4	6	#NULL!	#NULL!	3	#NULL!	4	4
2	35	7	2	4	2	1	1	1	1	1	1	1	1	6	2	3	4	2	2	2	2	2	0	0	0	0	0	0	0	0	0	0	0	2	0	3	1	0	0	1	6	6	6	6	6	6	#NULL!	2	4
1	21	8	1	2	2	4	1	1	1	1	5	1	4	4	3	3	3	3	2	1	4	2	1	0	0	0	0	0	0	0	0	0	0	2	1	3	0	1	0	0	6	6	6	2	6	3	3	4	4
1	34	8	1	4	2	1	1	1	6	6	1	6	6	6	4	4	3	3	3	2	2	2	0	0	0	0	0	0	0	0	0	0	0	2	1	3	0	0	0	1	6	#NULL!	#NULL!	6	#NULL!	#NULL!	#NULL!	5	5
1	23	5	1	2	2	1	1	2	1	1	1	3	2	6	4	4	3	3	2	2	4	2	1	0	1	0	1	0	0	0	1	0	0	1	1	2	0	1	0	1	5	6	6	6	4	5	#NULL!	5	5
2	19	3	1	4	2	1	1	1	1	1	1	2	5	6	3	3	3	3	2	2	3	2	1	0	0	0	0	0	0	0	0	0	0	2	0	1	0	0	0	1	6	6	6	6	5	2	#NULL!	4	4
2	19	7	1	2	1	4	1	1	1	1	1	1	1	1	4	4	4	4	4	4	4	4	1	0	1	0	0	0	0	0	0	0	0	2	0	3	0	1	1	0	6	6	6	6	6	6	6	5	5
2	19	7	1	2	3	4	1	5	1	1	5	3	3	6	4	4	4	4	4	4	4	4	0	0	0	0	0	0	0	0	0	0	0	2	0	3	0	1	0	0	2	6	6	2	4	4	#NULL!	5	5
1	20	8	1	2	2	4	1	6	6	1	6	6	1	6	3	1	1	1	1	1	1	1	0	0	0	0	0	0	0	0	0	0	0	2	1	3	0	1	0	0	#NULL!	#NULL!	6	#NULL!	#NULL!	6	#NULL!	4	1
1	25	7	1	4	3	2	1	2	3	3	3	6	1	2	3	3	4	3	3	3	3	3	0	0	0	0	1	0	0	0	0	0	0	2	1	3	0	0	0	1	5	4	4	4	#NULL!	6	5	4	4
2	35	8	2	4	2	1	1	1	1	6	1	6	4	6	4	4	4	4	4	4	4	4	0	0	0	0	0	0	0	0	0	0	0	2	0	3	1	0	0	1	6	6	#NULL!	6	#NULL!	3	#NULL!	5	5
1	19	8	1	2	2	4	1	2	1	1	6	1	4	6	4	3	3	3	3	3	3	3	0	0	0	0	0	0	0	0	0	0	0	2	1	3	0	1	0	0	5	6	6	#NULL!	6	3	#NULL!	5	4
2	33	4	2	4	1	1	1	3	3	3	2	3	4	6	4	4	3	3	3	3	3	3	0	0	0	0	0	0	0	0	0	0	0	1	0	2	1	0	1	1	4	4	4	5	4	3	#NULL!	5	5
2	35	4	3	4	2	3	1	4	1	3	6	6	4	6	3	2	2	2	2	2	3	3	1	0	0	0	0	0	0	0	0	0	0	2	0	2	1	0	0	0	3	6	4	#NULL!	#NULL!	3	#NULL!	4	2
1	35	3	2	4	1	1	1	2	2	2	6	2	3	6	3	3	3	3	2	2	3	2	1	0	0	0	0	0	0	1	0	1	0	2	1	1	1	0	1	1	5	5	5	#NULL!	5	4	#NULL!	4	4
2	19	8	1	2	2	4	1	3	2	2	6	2	2	6	4	3	3	3	2	3	4	3	1	0	0	0	0	0	0	0	1	0	0	2	0	3	0	1	0	0	4	5	5	#NULL!	5	5	#NULL!	5	4
1	29	7	2	4	1	1	1	1	1	2	1	1	2	6	3	4	2	2	3	3	3	2	0	0	0	0	0	0	0	0	0	0	0	2	1	3	1	0	1	1	6	6	5	6	6	5	#NULL!	4	5
2	33	8	5	1	2	1	1	2	6	2	6	6	3	6	1	4	4	4	3	3	4	2	0	0	1	0	0	0	0	1	1	0	0	1	0	3	0	1	0	1	5	#NULL!	5	#NULL!	#NULL!	4	#NULL!	1	5
2	35	3	3	4	1	1	1	6	4	1	1	4	3	6	4	3	3	2	2	2	2	3	0	0	0	0	0	0	0	0	0	0	0	2	0	1	1	0	1	1	#NULL!	3	6	6	3	4	#NULL!	5	4
2	29	4	4	4	1	1	1	1	1	6	1	1	6	6	-1	3	3	3	2	2	3	3	0	0	0	0	0	0	0	0	0	0	0	1	0	2	0	0	1	1	6	6	#NULL!	6	6	#NULL!	#NULL!	3	4
1	21	8	1	1	2	4	1	1	1	1	1	1	1	1	2	3	3	4	1	1	2	2	1	1	0	0	0	0	0	0	0	0	0	2	1	3	0	1	0	0	6	6	6	6	6	6	6	2	4
2	19	8	1	2	1	4	1	2	2	1	6	1	3	6	4	3	3	3	3	3	3	3	0	0	0	0	0	0	0	0	0	0	1	2	0	3	0	1	1	0	5	5	6	#NULL!	6	4	#NULL!	5	4
2	23	7	1	2	1	3	1	3	1	2	6	2	4	6	3	2	3	3	2	2	3	2	0	0	0	0	0	0	0	0	0	0	0	2	0	3	0	1	1	0	4	6	5	#NULL!	5	3	#NULL!	4	2
1	30	3	1	4	1	1	1	1	2	4	4	3	4	6	4	3	3	3	3	3	3	3	0	0	0	0	0	0	0	0	0	0	0	2	1	1	0	0	1	1	6	5	3	3	4	3	#NULL!	5	4
1	20	8	1	4	2	4	1	1	2	1	6	1	3	6	4	4	4	3	3	3	4	3	0	0	0	0	0	0	0	0	0	0	0	2	1	3	0	0	0	0	6	5	6	#NULL!	6	4	#NULL!	5	5
2	34	7	3	4	1	3	1	2	1	2	6	6	2	6	3	-1	2	-1	2	2	3	3	1	0	0	0	0	0	0	0	0	0	0	2	0	3	1	0	1	0	5	6	5	#NULL!	#NULL!	5	#NULL!	4	3
2	28	3	2	4	1	3	1	6	1	2	6	6	4	6	3	-1	3	3	2	3	-1	3	0	0	0	0	0	0	0	0	0	0	0	2	0	1	1	0	1	0	#NULL!	6	5	#NULL!	#NULL!	3	#NULL!	4	3
1	22	8	1	2	2	4	1	4	4	5	6	1	3	6	3	4	4	3	2	3	3	3	1	0	0	0	0	0	0	0	0	0	0	2	1	3	0	1	0	0	3	3	2	#NULL!	6	4	#NULL!	4	5
2	30	7	2	1	1	3	1	2	2	1	6	2	2	6	2	2	3	2	1	3	4	2	0	0	0	0	0	0	0	0	1	0	0	1	0	3	1	1	1	0	5	5	6	#NULL!	5	5	#NULL!	2	2
2	35	3	2	4	1	3	1	5	2	1	6	6	4	6	4	2	4	4	1	1	2	2	0	0	0	0	0	0	0	0	0	0	0	2	0	1	1	0	1	0	2	5	6	#NULL!	#NULL!	3	#NULL!	5	2
1	22	8	1	2	1	4	1	1	1	1	6	1	4	6	4	4	4	4	3	2	3	2	1	1	0	0	0	0	0	0	0	0	0	2	1	3	0	1	1	0	6	6	6	#NULL!	6	3	#NULL!	5	5
2	26	3	2	4	1	3	1	6	1	3	6	6	3	6	3	3	3	4	2	2	3	1	0	0	0	0	0	0	0	0	0	0	0	1	0	1	1	0	1	0	#NULL!	6	4	#NULL!	#NULL!	4	#NULL!	4	4
2	26	8	1	4	2	1	1	1	1	2	1	1	3	6	3	3	3	3	2	3	3	3	1	0	0	0	0	0	0	0	1	0	0	2	0	3	0	0	0	1	6	6	5	6	6	4	#NULL!	4	4
2	35	3	2	4	2	3	1	1	1	1	6	3	4	6	3	3	3	3	3	2	3	3	0	0	0	0	0	0	0	0	0	0	0	2	0	1	1	0	0	0	6	6	6	#NULL!	4	3	#NULL!	4	4
2	33	7	2	4	2	3	1	3	1	1	6	6	2	6	3	3	3	3	3	3	3	3	0	0	0	0	0	0	0	0	0	0	0	1	0	3	1	0	0	0	4	6	6	#NULL!	#NULL!	5	#NULL!	4	4
1	31	3	1	4	3	1	1	2	1	1	1	6	4	6	4	4	3	3	3	3	3	3	0	0	0	0	0	0	0	0	0	0	0	1	1	1	0	0	0	1	5	6	6	6	#NULL!	3	#NULL!	5	5
1	33	9	1	4	2	1	1	1	1	1	2	5	4	2	4	3	3	3	3	2	3	3	1	0	0	0	0	0	0	0	0	0	0	2	1	3	0	0	0	1	6	6	6	5	2	3	5	5	4
2	25	7	1	1	2	1	1	4	1	1	1	4	2	6	3	2	2	2	2	2	1	1	1	0	0	0	0	0	0	0	0	0	0	2	0	3	0	1	0	1	3	6	6	6	3	5	#NULL!	4	2
2	19	4	1	2	1	4	1	3	1	1	5	1	4	6	3	3	4	3	2	3	3	2	1	0	0	0	0	0	0	0	1	0	0	2	0	2	0	1	1	0	4	6	6	2	6	3	#NULL!	4	4
1	25	8	2	4	1	1	1	2	2	2	2	2	2	6	4	4	4	4	4	4	4	4	1	1	1	0	0	0	0	0	0	0	0	1	1	3	1	0	1	1	5	5	5	5	5	5	#NULL!	5	5
1	32	7	1	4	3	1	1	1	1	1	1	1	3	4	3	1	3	3	3	2	3	2	0	0	0	0	0	0	0	0	0	0	0	2	1	3	0	0	0	1	6	6	6	6	6	4	3	4	1
1	34	8	2	1	2	3	1	1	1	1	6	6	3	6	4	4	3	3	3	3	3	3	0	0	0	0	0	0	0	0	0	0	0	2	1	3	1	1	0	0	6	6	6	#NULL!	#NULL!	4	#NULL!	5	5
2	33	3	2	4	1	2	1	3	3	2	6	6	4	6	-1	-1	-1	2	2	3	3	3	0	0	0	0	0	0	0	0	0	0	0	2	0	1	1	0	1	1	4	4	5	#NULL!	#NULL!	3	#NULL!	3	3
1	19	4	1	2	1	4	1	4	1	1	6	1	3	6	4	2	2	3	3	2	3	3	1	0	0	0	0	1	0	1	0	0	0	1	1	2	0	1	1	0	3	6	6	#NULL!	6	4	#NULL!	5	2
1	18	4	1	4	1	4	1	4	2	1	6	4	5	6	4	4	4	4	3	3	3	3	0	0	0	0	0	0	0	0	0	0	0	2	1	2	0	0	1	0	3	5	6	#NULL!	3	2	#NULL!	5	5
2	33	3	2	4	1	3	1	2	1	3	6	6	4	6	4	4	3	3	3	3	3	3	0	0	0	0	0	0	0	0	0	0	0	1	0	1	1	0	1	0	5	6	4	#NULL!	#NULL!	3	#NULL!	5	5
2	24	4	2	4	1	3	1	1	1	1	6	6	4	6	3	2	3	3	3	3	3	2	0	0	0	0	0	0	0	0	0	0	0	2	0	2	1	0	1	0	6	6	6	#NULL!	#NULL!	3	#NULL!	4	2
2	26	7	1	2	2	1	1	4	1	1	6	6	3	6	2	3	2	2	2	2	2	2	0	0	0	0	0	0	0	0	0	0	0	2	0	3	0	1	0	1	3	6	6	#NULL!	#NULL!	4	#NULL!	2	4
2	23	8	1	2	2	1	1	2	1	1	1	2	3	4	3	3	3	3	2	2	3	2	1	0	0	0	0	0	0	0	1	0	0	2	0	3	0	1	0	1	5	6	6	6	5	4	3	4	4
1	33	5	2	4	1	1	1	3	1	1	6	4	4	6	4	2	2	3	3	3	3	2	0	0	0	0	0	0	0	0	0	0	0	1	1	2	1	0	1	1	4	6	6	#NULL!	3	3	#NULL!	5	2
1	32	8	2	4	2	1	1	1	1	1	1	1	5	6	4	4	4	4	4	4	4	4	1	0	0	0	0	0	0	0	0	0	0	2	1	3	1	0	0	1	6	6	6	6	6	2	#NULL!	5	5
1	26	7	1	4	2	3	1	1	1	1	6	5	4	6	3	3	3	3	2	2	2	2	1	0	0	0	0	0	0	0	0	0	0	2	1	3	0	0	0	0	6	6	6	#NULL!	2	3	#NULL!	4	4
2	24	9	1	1	3	3	1	3	1	1	6	5	2	6	2	2	3	3	2	2	3	2	0	0	0	0	0	0	0	0	0	0	0	2	0	3	0	1	0	0	4	6	6	#NULL!	2	5	#NULL!	2	2
2	21	8	1	2	1	4	1	1	1	1	6	2	1	6	3	3	3	3	2	2	2	1	1	0	0	0	0	0	0	0	0	0	0	2	0	3	0	1	1	0	6	6	6	#NULL!	5	6	#NULL!	4	4
2	20	8	2	2	2	2	1	2	1	1	1	4	3	6	3	3	3	3	2	2	3	4	0	0	1	1	0	0	0	0	0	0	0	2	0	3	1	1	0	1	5	6	6	6	3	4	#NULL!	4	4
1	21	8	1	2	2	4	1	1	1	1	2	2	4	4	3	3	3	3	3	3	3	3	1	0	0	0	0	0	0	0	0	0	0	2	1	3	0	1	0	0	6	6	6	5	5	3	3	4	4
2	25	2	3	4	1	3	1	6	3	1	6	6	4	6	3	4	4	4	3	3	4	3	0	0	0	0	0	0	0	0	0	0	0	2	0	1	1	0	1	0	#NULL!	4	6	#NULL!	#NULL!	3	#NULL!	4	5
1	32	7	1	4	3	1	1	2	2	5	1	3	5	6	3	4	2	3	3	4	3	3	0	0	0	0	0	0	0	0	0	0	0	1	1	3	0	0	0	1	5	5	2	6	4	2	#NULL!	4	5
1	21	8	1	2	3	4	1	1	1	1	6	1	2	1	2	3	2	2	3	1	3	2	1	0	0	1	1	0	0	0	1	0	1	2	1	3	0	1	0	0	6	6	6	#NULL!	6	5	6	2	4
2	18	4	1	2	3	4	1	1	3	6	6	6	6	6	3	3	3	3	2	3	4	2	1	0	0	0	0	0	0	0	0	0	0	2	0	2	0	1	0	0	6	4	#NULL!	#NULL!	#NULL!	#NULL!	#NULL!	4	4
2	33	5	2	4	3	1	1	1	1	1	1	5	2	2	3	3	3	3	3	3	3	3	1	0	0	0	0	0	0	0	0	0	0	1	0	2	1	0	0	1	6	6	6	6	2	5	5	4	4
1	29	9	2	3	1	1	1	2	3	2	2	2	3	3	3	-1	3	2	2	-1	-1	-1	0	0	0	0	0	0	0	0	0	0	0	1	1	3	1	1	1	1	5	4	5	5	5	4	4	4	3
2	35	8	2	4	2	1	1	1	1	1	1	1	1	1	1	1	1	2	3	2	2	2	0	0	1	0	0	0	0	0	0	0	1	2	0	3	1	0	0	1	6	6	6	6	6	6	6	1	1
1	32	2	2	4	1	1	1	2	1	3	6	6	2	6	3	2	3	3	2	3	2	3	0	0	1	0	0	0	0	0	0	0	0	2	1	1	1	0	1	1	5	6	4	#NULL!	#NULL!	5	#NULL!	4	2
2	30	8	2	4	1	1	1	1	1	1	1	4	1	3	3	3	3	3	3	3	3	3	1	0	0	0	0	0	0	0	0	0	0	2	0	3	1	0	1	1	6	6	6	6	3	6	4	4	4
1	24	3	1	4	2	3	1	3	1	1	2	3	4	6	3	3	3	3	2	3	3	3	0	0	0	0	0	0	0	0	0	0	0	2	1	1	0	0	0	0	4	6	6	5	4	3	#NULL!	4	4
1	25	3	2	2	2	1	1	1	1	1	6	6	4	6	4	4	4	4	4	4	4	3	0	0	0	0	0	0	0	0	0	0	0	2	1	1	1	1	0	1	6	6	6	#NULL!	#NULL!	3	#NULL!	5	5
1	27	7	2	1	1	1	1	1	1	2	1	2	3	6	3	3	4	2	3	1	3	3	1	0	0	0	0	0	0	0	1	0	0	1	1	3	1	1	1	1	6	6	5	6	5	4	#NULL!	4	4
1	34	3	4	4	1	1	1	2	1	3	6	6	4	6	3	3	3	3	3	2	3	3	0	0	0	0	0	0	0	0	0	0	0	1	1	1	0	0	1	1	5	6	4	#NULL!	#NULL!	3	#NULL!	4	4
1	18	4	1	2	2	4	1	1	1	1	6	3	3	6	4	4	4	4	4	4	4	4	0	0	0	0	0	0	0	0	0	0	0	2	1	2	0	1	0	0	6	6	6	#NULL!	4	4	#NULL!	5	5
2	26	7	2	2	1	1	1	3	2	2	1	1	2	6	4	4	4	4	4	2	2	2	0	0	0	0	0	0	0	0	0	0	0	2	0	3	1	1	1	1	4	5	5	6	6	5	#NULL!	5	5
2	30	2	2	4	1	1	1	6	1	6	6	6	6	6	2	2	2	2	2	2	2	2	0	0	0	0	0	0	0	0	0	0	0	2	0	1	1	0	1	1	#NULL!	6	#NULL!	#NULL!	#NULL!	#NULL!	#NULL!	2	2
1	20	8	1	2	1	4	1	2	2	2	3	2	4	5	3	3	3	3	3	3	3	3	1	0	0	0	0	0	0	0	0	0	0	2	1	3	0	1	1	0	5	5	5	4	5	3	2	4	4
1	29	2	2	4	3	3	1	1	2	1	6	6	4	6	3	3	3	3	3	3	-1	2	0	0	0	0	0	0	0	0	0	1	0	2	1	1	1	0	0	0	6	5	6	#NULL!	#NULL!	3	#NULL!	4	4
2	21	7	1	2	2	1	1	4	1	1	1	3	1	5	4	4	4	4	4	4	4	4	0	0	0	0	0	0	0	0	0	0	0	2	0	3	0	1	0	1	3	6	6	6	4	6	2	5	5
2	19	8	1	2	2	4	1	1	1	1	6	1	2	6	3	3	4	4	2	2	3	2	1	1	0	0	0	0	0	0	0	0	0	2	0	3	0	1	0	0	6	6	6	#NULL!	6	5	#NULL!	4	4
2	30	3	2	4	1	3	1	4	3	1	6	6	3	6	3	3	3	4	3	3	3	3	0	0	0	0	0	0	0	0	0	0	0	2	0	1	1	0	1	0	3	4	6	#NULL!	#NULL!	4	#NULL!	4	4
2	24	9	1	1	3	4	1	3	1	1	3	2	2	6	3	3	3	3	3	3	3	3	1	0	0	0	0	0	0	0	1	0	0	2	0	3	0	1	0	0	4	6	6	4	5	5	#NULL!	4	4
1	21	8	1	2	1	4	1	4	2	2	6	4	4	6	4	4	4	3	3	2	3	3	0	0	0	0	0	0	0	0	0	0	0	1	1	3	0	1	1	0	3	5	5	#NULL!	3	3	#NULL!	5	5
2	20	8	1	2	1	4	1	3	1	1	6	4	1	5	4	4	4	3	2	1	2	2	0	0	0	0	0	1	0	1	0	0	0	1	0	3	0	1	1	0	4	6	6	#NULL!	3	6	2	5	5
2	32	5	2	4	2	3	1	1	2	1	4	2	4	6	4	4	3	4	3	3	4	4	0	0	0	0	0	0	0	0	0	0	0	2	0	2	1	0	0	0	6	5	6	3	5	3	#NULL!	5	5
1	22	5	1	4	1	3	1	5	1	2	6	5	5	6	3	3	3	3	3	3	3	3	0	0	0	0	0	0	0	0	0	0	0	2	1	2	0	0	1	0	2	6	5	#NULL!	2	2	#NULL!	4	4
1	30	5	1	1	3	1	1	2	6	2	6	1	3	6	4	4	4	4	4	4	4	4	0	0	0	0	0	1	0	1	1	0	0	1	1	2	0	1	0	1	5	#NULL!	5	#NULL!	6	4	#NULL!	5	5
1	23	8	1	2	1	4	1	1	1	1	1	2	4	5	4	4	4	4	4	4	4	4	0	0	0	0	0	0	0	0	0	0	0	2	1	3	0	1	1	0	6	6	6	6	5	3	2	5	5
2	35	8	2	2	3	3	1	6	2	4	3	3	2	2	3	3	3	3	3	3	3	3	0	0	0	0	0	0	0	0	0	0	0	1	0	3	1	1	0	0	#NULL!	5	3	4	4	5	5	4	4
2	25	3	2	4	1	3	1	5	1	2	6	6	5	6	4	2	3	3	2	2	2	2	0	0	0	0	0	0	0	0	0	0	0	2	0	1	1	0	1	0	2	6	5	#NULL!	#NULL!	2	#NULL!	5	2
2	31	3	2	4	1	3	1	3	1	1	6	1	1	6	3	3	3	2	3	3	4	2	0	0	0	0	0	0	0	0	0	0	0	1	0	1	1	0	1	0	4	6	6	#NULL!	6	6	#NULL!	4	4
1	21	4	1	2	1	4	1	1	1	1	6	2	3	6	4	4	4	3	2	3	3	2	1	0	0	0	1	0	0	0	0	1	0	2	1	2	0	1	1	0	6	6	6	#NULL!	5	4	#NULL!	5	5
1	32	2	2	4	1	2	1	3	1	1	6	6	5	6	4	1	4	3	3	3	2	4	0	0	0	0	0	0	0	1	1	1	0	2	1	1	1	0	1	1	4	6	6	#NULL!	#NULL!	2	#NULL!	5	1
2	29	3	2	4	1	3	1	5	5	5	5	5	5	5	2	2	2	2	2	2	2	2	0	0	0	0	0	0	0	0	0	0	0	2	0	1	1	0	1	0	2	2	2	2	2	2	2	2	2
2	34	4	2	4	2	3	1	3	2	1	5	2	2	1	4	4	3	3	3	3	3	3	0	0	0	0	0	0	0	0	0	0	0	2	0	2	1	0	0	0	4	5	6	2	5	5	6	5	5
2	34	3	2	4	2	2	1	6	2	3	6	4	6	6	2	4	4	3	2	2	1	1	1	0	0	0	0	0	0	0	0	0	0	2	0	1	1	0	0	1	#NULL!	5	4	#NULL!	3	#NULL!	#NULL!	2	5
2	33	3	2	2	1	3	1	3	1	3	6	6	4	6	4	4	2	3	3	3	3	3	0	0	0	0	0	0	0	0	0	0	0	1	0	1	1	1	1	0	4	6	4	#NULL!	#NULL!	3	#NULL!	5	5
1	31	3	2	4	1	1	1	2	1	1	6	6	3	6	4	4	4	4	3	3	3	3	0	0	0	0	0	0	0	0	0	0	0	2	1	1	1	0	1	1	5	6	6	#NULL!	#NULL!	4	#NULL!	5	5
2	35	2	2	4	1	3	1	6	6	6	6	6	3	6	4	4	4	2	3	1	2	2	0	0	0	0	0	0	0	0	0	0	0	2	0	1	1	0	1	0	#NULL!	#NULL!	#NULL!	#NULL!	#NULL!	4	#NULL!	5	5
2	19	7	1	2	1	4	1	2	1	1	6	2	3	6	4	3	3	3	3	3	3	3	0	0	0	0	0	0	0	0	0	0	0	2	0	3	0	1	1	0	5	6	6	#NULL!	5	4	#NULL!	5	4
2	34	3	2	4	2	1	1	2	6	3	6	2	4	5	2	2	1	2	3	2	1	1	0	0	1	0	0	0	0	0	0	1	0	2	0	1	1	0	0	1	5	#NULL!	4	#NULL!	5	3	2	2	2
1	22	8	1	2	3	4	1	3	1	1	6	1	3	4	4	4	4	4	3	3	3	2	0	0	0	0	0	0	0	0	0	0	0	2	1	3	0	1	0	0	4	6	6	#NULL!	6	4	3	5	5
2	22	8	1	2	3	3	1	3	1	1	5	4	4	1	4	3	4	3	3	3	3	2	1	0	0	0	0	0	0	0	0	0	0	2	0	3	0	1	0	0	4	6	6	2	3	3	6	5	4
2	26	5	2	4	1	3	1	3	3	1	6	3	2	6	2	3	3	3	2	2	3	3	1	0	0	0	0	0	0	0	0	0	0	1	0	2	1	0	1	0	4	4	6	#NULL!	4	5	#NULL!	2	4
2	30	3	2	4	1	3	1	1	6	1	6	6	4	6	4	4	-1	3	-1	3	3	3	0	0	0	0	0	0	0	0	0	0	0	2	0	1	1	0	1	0	6	#NULL!	6	#NULL!	#NULL!	3	#NULL!	5	5
2	34	3	2	4	1	3	1	3	1	1	6	1	1	6	2	3	3	3	3	3	3	3	0	0	0	0	0	0	0	0	0	0	0	2	0	1	1	0	1	0	4	6	6	#NULL!	6	6	#NULL!	2	4
2	20	7	1	4	1	4	1	2	2	1	1	2	3	6	3	3	3	3	3	3	3	3	0	0	0	0	0	0	0	0	0	0	0	2	0	3	0	0	1	0	5	5	6	6	5	4	#NULL!	4	4
2	27	3	2	4	2	3	1	3	1	1	6	3	2	6	3	2	2	3	3	3	3	3	0	0	0	0	0	0	0	0	0	0	0	2	0	1	1	0	0	0	4	6	6	#NULL!	4	5	#NULL!	4	2
2	22	8	1	1	1	4	1	2	1	1	6	1	5	6	2	3	3	2	3	2	3	2	0	0	0	0	0	0	0	0	0	0	0	2	0	3	0	1	1	0	5	6	6	#NULL!	6	2	#NULL!	2	4
2	33	3	2	4	1	1	1	5	1	1	1	1	5	6	3	3	3	3	3	3	3	3	0	0	0	0	0	0	0	0	0	0	0	2	0	1	1	0	1	1	2	6	6	6	6	2	#NULL!	4	4
2	35	7	2	4	2	1	1	3	3	3	3	2	2	5	3	3	3	3	3	3	3	3	0	0	0	0	0	0	0	0	1	0	0	1	0	3	1	0	0	1	4	4	4	4	5	5	2	4	4
1	30	8	2	4	1	1	1	2	1	1	1	6	2	6	4	3	4	3	2	2	2	2	0	0	0	0	0	0	0	0	0	0	0	2	1	3	1	0	1	1	5	6	6	6	#NULL!	5	#NULL!	5	4
1	19	3	1	4	3	4	1	3	2	1	4	2	4	6	4	3	4	3	3	3	3	4	0	0	0	0	0	0	0	0	0	0	0	2	1	1	0	0	0	0	4	5	6	3	5	3	#NULL!	5	4
2	33	5	3	4	1	1	1	2	4	3	6	6	2	6	4	1	1	2	2	3	2	3	1	1	0	0	0	0	0	0	0	0	0	2	0	2	1	0	1	1	5	3	4	#NULL!	#NULL!	5	#NULL!	5	1
2	31	7	2	4	1	3	1	1	1	1	2	2	1	6	4	3	3	3	2	2	3	1	1	0	0	0	0	0	0	1	1	0	0	2	0	3	1	0	1	0	6	6	6	5	5	6	#NULL!	5	4
1	31	5	2	4	1	1	1	3	2	3	6	6	5	6	4	3	3	3	2	3	3	3	0	0	0	0	0	0	0	0	0	0	0	2	1	2	1	0	1	1	4	5	4	#NULL!	#NULL!	2	#NULL!	5	4
2	33	4	2	4	1	1	1	1	3	2	1	6	1	5	3	2	2	2	3	3	2	2	1	0	0	0	0	0	0	0	0	0	0	2	0	2	1	0	1	1	6	4	5	6	#NULL!	6	2	4	2
2	30	4	2	4	1	3	1	1	1	1	5	1	4	6	3	3	3	3	3	3	3	3	0	0	0	0	0	0	0	0	0	0	0	1	0	2	1	0	1	0	6	6	6	2	6	3	#NULL!	4	4
2	33	4	2	4	1	3	1	1	1	1	1	1	1	6	3	3	3	3	3	3	3	3	0	0	0	0	0	0	0	0	0	0	0	1	0	2	1	0	1	0	6	6	6	6	6	6	#NULL!	4	4
1	27	6	1	4	3	1	1	6	1	4	6	6	2	4	4	3	4	4	2	1	2	1	1	0	0	0	0	0	0	0	1	0	0	2	1	2	0	0	0	1	#NULL!	6	3	#NULL!	#NULL!	5	3	5	4
1	32	6	3	4	2	1	1	6	6	6	6	6	6	6	-1	-1	2	3	3	3	3	3	0	0	0	0	0	0	0	0	0	0	0	2	1	2	1	0	0	1	#NULL!	#NULL!	#NULL!	#NULL!	#NULL!	#NULL!	#NULL!	3	3
2	23	4	1	4	1	3	1	4	1	1	2	3	1	6	4	3	3	3	3	3	3	3	0	0	0	0	0	0	0	0	0	0	0	2	0	2	0	0	1	0	3	6	6	5	4	6	#NULL!	5	4
2	23	8	1	2	1	3	1	2	1	1	5	1	4	6	4	4	4	3	2	2	3	1	1	0	0	0	0	0	0	0	1	0	0	2	0	3	0	1	1	0	5	6	6	2	6	3	#NULL!	5	5
1	19	7	1	4	1	4	1	1	2	3	6	2	3	6	3	3	3	3	2	2	3	3	1	1	0	1	0	0	0	0	0	0	0	2	1	3	0	0	1	0	6	5	4	#NULL!	5	4	#NULL!	4	4
2	27	3	1	4	1	3	1	1	3	5	6	6	5	6	3	3	3	3	3	3	3	3	0	0	0	0	0	0	0	0	0	0	0	2	0	1	0	0	1	0	6	4	2	#NULL!	#NULL!	2	#NULL!	4	4
1	27	7	1	4	1	3	1	6	2	6	5	5	2	6	4	4	4	4	4	4	4	4	0	0	0	0	0	0	0	0	0	0	0	2	1	3	0	0	1	0	#NULL!	5	#NULL!	2	2	5	#NULL!	5	5
2	19	8	1	2	3	4	1	3	2	1	6	2	2	6	4	3	3	3	2	3	3	3	1	0	0	0	0	0	0	0	1	0	0	2	0	3	0	1	0	0	4	5	6	#NULL!	5	5	#NULL!	5	4
2	34	3	2	4	3	1	1	3	2	1	4	6	2	6	4	4	4	4	2	2	4	2	0	0	0	0	0	0	0	0	1	0	0	1	0	1	1	0	0	1	4	5	6	3	#NULL!	5	#NULL!	5	5
2	28	3	2	4	1	3	1	2	6	6	6	5	5	6	3	3	3	3	3	3	4	3	0	0	0	0	0	0	0	0	0	0	0	2	0	1	1	0	1	0	5	#NULL!	#NULL!	#NULL!	2	2	#NULL!	4	4
1	23	7	1	2	1	3	1	2	2	1	6	2	2	6	4	3	4	3	3	3	3	3	0	0	0	0	0	1	0	0	0	0	0	2	1	3	0	1	1	0	5	5	6	#NULL!	5	5	#NULL!	5	4
2	24	9	1	1	3	4	1	1	1	3	6	2	5	6	4	3	3	3	3	2	2	2	1	0	0	0	0	0	0	0	0	0	0	2	0	3	0	1	0	0	6	6	4	#NULL!	5	2	#NULL!	5	4
1	23	7	2	4	1	1	1	1	4	1	1	6	2	6	4	4	4	4	4	4	4	4	0	0	0	0	0	0	0	1	1	0	0	2	1	3	1	0	1	1	6	3	6	6	#NULL!	5	#NULL!	5	5
1	27	5	2	4	2	1	1	1	1	1	6	1	1	6	4	4	4	4	4	4	4	4	0	0	0	0	0	0	0	0	0	0	0	2	1	2	1	0	0	1	6	6	6	#NULL!	6	6	#NULL!	5	5
2	24	9	1	2	1	4	1	2	1	1	6	2	4	6	4	3	2	3	2	1	3	3	0	0	0	0	0	0	0	0	0	0	0	1	0	3	0	1	1	0	5	6	6	#NULL!	5	3	#NULL!	5	4
1	30	7	2	1	1	1	1	1	1	1	2	5	4	6	4	4	4	4	3	3	4	3	1	0	1	0	0	0	0	0	0	0	0	1	1	3	1	1	1	1	6	6	6	5	2	3	#NULL!	5	5
2	32	4	2	4	1	1	1	6	1	6	1	6	3	6	1	2	3	3	2	3	3	1	0	0	0	0	0	0	0	0	0	0	0	2	0	2	1	0	1	1	#NULL!	6	#NULL!	6	#NULL!	4	#NULL!	1	2
1	20	8	1	1	1	4	1	1	2	2	6	3	2	6	4	3	3	3	2	2	4	3	0	0	0	0	0	0	0	0	0	0	0	1	1	3	0	1	1	0	6	5	5	#NULL!	4	5	#NULL!	5	4
1	25	4	2	4	1	2	1	2	2	3	2	6	3	6	4	3	3	3	3	3	3	3	0	0	0	0	0	0	0	0	0	0	0	2	1	2	1	0	1	1	5	5	4	5	#NULL!	4	#NULL!	5	4
2	23	8	1	2	2	4	1	3	2	2	6	2	3	6	3	3	3	3	3	3	3	3	0	0	0	0	0	0	0	0	0	0	0	1	0	3	0	1	0	0	4	5	5	#NULL!	5	4	#NULL!	4	4
2	35	3	2	4	1	3	1	6	6	6	6	6	5	6	3	3	3	3	3	3	3	3	0	0	0	0	0	0	0	0	0	0	0	2	0	1	1	0	1	0	#NULL!	#NULL!	#NULL!	#NULL!	#NULL!	2	#NULL!	4	4
2	32	2	2	4	3	3	1	3	1	1	6	6	4	6	3	2	3	2	-1	2	3	2	0	0	0	0	1	0	0	0	0	0	0	2	0	1	1	0	0	0	4	6	6	#NULL!	#NULL!	3	#NULL!	4	2
2	20	8	1	2	1	4	1	1	1	2	6	1	5	6	3	3	3	3	3	3	3	3	0	0	0	0	0	0	0	0	0	0	0	2	0	3	0	1	1	0	6	6	5	#NULL!	6	2	#NULL!	4	4
1	24	8	1	1	1	3	1	5	1	1	6	6	3	6	3	3	3	3	3	3	3	3	0	0	0	0	0	0	0	0	0	0	0	2	1	3	0	1	1	0	2	6	6	#NULL!	#NULL!	4	#NULL!	4	4
1	19	6	1	4	1	4	1	3	1	1	3	2	3	5	4	4	4	4	4	4	4	4	0	0	0	0	0	0	0	0	0	0	0	2	1	2	0	0	1	0	4	6	6	4	5	4	2	5	5
2	35	2	2	4	1	3	1	1	1	1	6	4	1	6	4	4	4	4	-1	-1	4	4	0	0	0	0	0	0	0	0	0	0	0	2	0	1	1	0	1	0	6	6	6	#NULL!	3	6	#NULL!	5	5
2	19	8	1	2	2	4	1	4	1	1	6	1	3	6	4	4	4	4	4	3	4	4	1	0	0	0	0	0	0	0	0	0	0	2	0	3	0	1	0	0	3	6	6	#NULL!	6	4	#NULL!	5	5
2	30	3	2	4	1	1	1	3	2	4	2	6	4	6	4	3	4	3	3	2	2	2	0	0	0	0	0	0	0	0	0	0	0	2	0	1	1	0	1	1	4	5	3	5	#NULL!	3	#NULL!	5	4
1	20	8	1	2	1	4	1	1	1	1	1	1	1	3	4	4	4	3	2	2	3	3	1	0	0	0	0	0	0	0	0	0	0	2	1	3	0	1	1	0	6	6	6	6	6	6	4	5	5
2	31	2	2	4	3	3	1	6	5	2	2	3	2	6	3	2	3	3	3	2	3	2	0	0	0	0	0	0	0	0	0	0	0	2	0	1	1	0	0	0	#NULL!	2	5	5	4	5	#NULL!	4	2
1	30	8	2	2	3	1	1	1	1	1	1	1	1	6	4	3	3	3	3	3	3	3	1	0	0	0	0	0	0	0	1	0	0	2	1	3	1	1	0	1	6	6	6	6	6	6	#NULL!	5	4
2	24	3	2	4	1	3	1	2	1	1	6	4	3	6	4	3	3	3	3	3	3	3	0	0	0	0	0	0	0	0	0	0	0	2	0	1	1	0	1	0	5	6	6	#NULL!	3	4	#NULL!	5	4
1	31	8	1	1	2	1	1	1	1	1	1	1	1	6	2	3	3	3	3	3	3	3	0	0	0	0	0	0	0	0	0	0	0	2	1	3	0	1	0	1	6	6	6	6	6	6	#NULL!	2	4
1	20	4	1	4	1	3	1	2	1	1	6	6	4	6	4	3	3	3	2	3	3	2	0	0	0	0	0	0	0	0	0	0	0	2	1	2	0	0	1	0	5	6	6	#NULL!	#NULL!	3	#NULL!	5	4
1	27	7	1	4	3	1	1	2	1	2	1	6	1	5	4	3	3	3	2	2	3	2	1	0	0	0	0	0	0	0	0	0	0	2	1	3	0	0	0	1	5	6	5	6	#NULL!	6	2	5	4
2	25	8	2	2	1	3	1	5	1	2	6	5	2	5	3	2	2	3	3	3	2	3	0	0	0	0	0	0	0	0	0	0	0	2	0	3	1	1	1	0	2	6	5	#NULL!	2	5	2	4	2
1	25	4	1	4	1	3	1	5	1	1	2	6	2	6	3	3	3	3	2	3	3	2	0	0	0	0	0	0	0	0	0	0	0	1	1	2	0	0	1	0	2	6	6	5	#NULL!	5	#NULL!	4	4
1	30	4	2	4	1	1	1	1	2	2	1	3	4	5	4	3	4	4	2	2	3	3	0	0	0	0	0	0	0	0	0	0	0	1	1	2	1	0	1	1	6	5	5	6	4	3	2	5	4
1	34	3	2	4	1	1	1	1	1	1	1	1	1	6	4	4	4	4	4	4	4	4	0	0	0	0	0	0	0	0	0	0	0	2	1	1	1	0	1	1	6	6	6	6	6	6	#NULL!	5	5
1	19	3	1	4	1	4	1	5	1	2	6	1	2	6	4	3	2	4	3	2	4	4	1	0	0	0	0	0	1	0	0	0	1	2	1	1	0	0	1	0	2	6	5	#NULL!	6	5	#NULL!	5	4
1	32	4	2	4	2	1	1	2	2	2	6	2	6	6	3	3	2	3	2	3	3	2	1	0	0	0	0	0	0	0	1	0	0	2	1	2	1	0	0	1	5	5	5	#NULL!	5	#NULL!	#NULL!	4	4
2	23	8	1	2	1	4	1	2	1	1	6	2	2	2	4	3	3	3	2	2	3	2	1	0	0	0	1	0	0	0	0	0	0	2	0	3	0	1	1	0	5	6	6	#NULL!	5	5	5	5	4
2	22	3	2	4	1	3	1	2	3	1	6	6	2	6	3	2	3	2	3	2	3	2	0	0	0	0	0	0	0	0	0	0	0	2	0	1	1	0	1	0	5	4	6	#NULL!	#NULL!	5	#NULL!	4	2
2	28	4	2	4	3	1	1	6	6	2	6	3	1	6	3	3	3	3	3	3	3	4	0	0	0	0	0	0	0	0	0	0	0	2	0	2	1	0	0	1	#NULL!	#NULL!	5	#NULL!	4	6	#NULL!	4	4
2	25	7	2	2	1	3	1	1	3	4	6	4	4	6	3	3	3	3	3	3	3	3	1	0	0	0	1	0	0	0	1	0	0	2	0	3	1	1	1	0	6	4	3	#NULL!	3	3	#NULL!	4	4
1	19	4	1	1	1	4	1	3	1	2	2	2	3	6	3	3	3	3	3	3	3	3	0	0	1	0	1	0	0	0	0	0	0	2	1	2	0	1	1	0	4	6	5	5	5	4	#NULL!	4	4
1	25	8	1	4	3	3	1	1	1	1	1	6	1	4	3	1	1	3	2	2	3	2	0	0	0	0	0	0	0	0	0	0	0	2	1	3	0	0	0	0	6	6	6	6	#NULL!	6	3	4	1
2	28	3	2	4	1	1	1	4	4	3	1	1	4	5	3	3	3	2	3	2	2	3	0	0	0	0	0	0	0	0	0	0	0	2	0	1	1	0	1	1	3	3	4	6	6	3	2	4	4
2	18	4	1	2	1	4	1	5	3	2	6	2	5	6	3	3	3	3	2	3	3	3	0	0	0	0	0	0	0	0	1	0	0	2	0	2	0	1	1	0	2	4	5	#NULL!	5	2	#NULL!	4	4
1	18	4	1	2	1	4	1	1	1	1	6	2	2	6	4	3	4	4	2	2	4	3	0	0	1	0	0	0	0	0	0	0	0	2	1	2	0	1	1	0	6	6	6	#NULL!	5	5	#NULL!	5	4
2	26	8	1	4	2	1	1	1	1	1	6	2	4	6	4	4	3	3	4	3	3	3	0	0	0	0	0	0	0	0	0	0	0	1	0	3	0	0	0	1	6	6	6	#NULL!	5	3	#NULL!	5	5
1	29	8	2	4	2	1	1	1	1	1	1	2	1	3	3	3	3	3	2	2	3	2	1	1	0	0	0	0	0	0	0	0	0	1	1	3	1	0	0	1	6	6	6	6	5	6	4	4	4
1	25	9	6	1	3	1	1	1	1	1	2	2	1	6	3	3	3	3	3	2	3	3	0	0	0	0	0	0	0	0	0	0	0	2	1	3	1	1	0	1	6	6	6	5	5	6	#NULL!	4	4
2	34	4	2	4	1	3	1	1	2	2	6	2	3	6	3	3	3	3	3	3	3	3	0	0	0	0	0	0	0	0	0	0	0	2	0	2	1	0	1	0	6	5	5	#NULL!	5	4	#NULL!	4	4
1	26	8	1	2	2	4	1	2	1	1	1	1	4	6	4	3	3	3	2	2	2	1	0	0	0	0	0	0	0	0	0	0	0	2	1	3	0	1	0	0	5	6	6	6	6	3	#NULL!	5	4
1	23	6	1	2	3	3	1	3	3	2	6	2	4	6	2	3	3	2	3	2	3	2	1	0	1	0	0	0	0	0	0	0	0	2	1	2	0	1	0	0	4	4	5	#NULL!	5	3	#NULL!	2	4
1	23	3	2	4	1	3	1	2	2	2	2	2	2	2	3	3	3	3	3	3	3	3	1	0	0	0	0	0	0	0	0	0	0	2	1	1	1	0	1	0	5	5	5	5	5	5	5	4	4
2	31	7	2	4	1	1	1	3	3	1	1	1	1	6	3	3	3	2	3	3	3	3	0	0	0	0	0	0	0	0	0	0	0	2	0	3	1	0	1	1	4	4	6	6	6	6	#NULL!	4	4
1	20	7	1	2	2	4	1	1	1	1	6	3	4	6	3	3	3	3	3	2	3	3	1	0	0	0	0	0	0	0	0	0	0	2	1	3	0	1	0	0	6	6	6	#NULL!	4	3	#NULL!	4	4
1	23	3	1	4	2	3	1	1	1	2	6	4	2	6	3	4	3	2	2	2	3	1	0	0	0	0	0	0	0	0	0	0	0	2	1	1	0	0	0	0	6	6	5	#NULL!	3	5	#NULL!	4	5
2	32	4	2	4	2	3	1	3	1	1	6	6	4	6	3	2	3	3	3	3	3	3	1	0	0	0	0	0	0	0	0	0	0	2	0	2	1	0	0	0	4	6	6	#NULL!	#NULL!	3	#NULL!	4	2
2	35	7	2	4	1	2	1	1	5	1	6	2	4	6	3	2	2	3	2	2	2	1	0	0	1	0	0	0	0	1	0	0	0	1	0	3	1	0	1	1	6	2	6	#NULL!	5	3	#NULL!	4	2
1	20	8	1	2	1	4	1	1	1	1	6	4	3	6	4	4	2	3	3	3	3	2	1	1	0	0	1	0	0	0	0	0	1	2	1	3	0	1	1	0	6	6	6	#NULL!	3	4	#NULL!	5	5
2	34	3	2	4	1	3	1	1	1	1	6	6	1	6	4	2	2	2	1	3	3	1	0	0	0	0	0	0	0	0	0	0	0	2	0	1	1	0	1	0	6	6	6	#NULL!	#NULL!	6	#NULL!	5	2
1	21	7	1	2	2	3	1	3	3	1	4	1	3	6	4	3	4	3	2	2	3	2	1	0	0	0	0	0	0	0	0	0	1	2	1	3	0	1	0	0	4	4	6	3	6	4	#NULL!	5	4
1	34	5	2	4	2	1	1	3	3	5	6	3	4	6	4	4	4	4	4	2	4	3	0	0	0	0	0	0	0	0	0	0	0	1	1	2	1	0	0	1	4	4	2	#NULL!	4	3	#NULL!	5	5
1	23	8	1	2	1	4	1	1	2	1	6	1	3	6	4	3	3	3	3	3	3	2	1	1	0	0	0	0	0	1	1	0	0	2	1	3	0	1	1	0	6	5	6	#NULL!	6	4	#NULL!	5	4
2	26	9	1	2	1	1	1	1	3	1	1	1	4	2	3	3	2	3	3	2	2	2	1	0	0	0	0	0	0	0	1	0	0	2	0	3	0	1	1	1	6	4	6	6	6	3	5	4	4
2	35	3	2	4	1	3	1	2	2	6	6	2	3	6	3	3	3	3	3	3	3	3	0	0	0	0	0	0	0	0	0	0	0	2	0	1	1	0	1	0	5	5	#NULL!	#NULL!	5	4	#NULL!	4	4
2	33	3	2	4	1	2	1	1	1	1	6	1	2	6	3	3	3	3	3	3	3	3	0	0	0	0	0	0	0	0	0	0	0	2	0	1	1	0	1	1	6	6	6	#NULL!	6	5	#NULL!	4	4
2	23	5	2	4	3	1	1	2	3	2	6	6	2	6	3	3	3	3	3	3	3	3	0	0	0	0	0	0	0	0	0	0	0	2	0	2	1	0	0	1	5	4	5	#NULL!	#NULL!	5	#NULL!	4	4
2	30	3	2	4	3	3	1	1	1	1	6	6	4	6	2	3	3	3	2	-1	3	-1	0	0	0	0	0	0	0	0	0	0	0	1	0	1	1	0	0	0	6	6	6	#NULL!	#NULL!	3	#NULL!	2	4
1	26	7	1	2	1	1	1	1	1	1	6	2	2	6	2	4	3	3	2	3	3	3	1	0	0	0	0	0	0	0	1	0	0	2	1	3	0	1	1	1	6	6	6	#NULL!	5	5	#NULL!	2	5
1	30	5	1	4	2	1	1	6	1	2	6	6	4	6	4	2	2	3	3	3	3	3	0	0	0	0	0	0	0	0	0	0	0	2	1	2	0	0	0	1	#NULL!	6	5	#NULL!	#NULL!	3	#NULL!	5	2
2	29	7	2	4	1	2	1	2	1	1	2	2	2	4	3	3	3	2	2	2	3	2	0	0	0	0	0	0	0	0	0	0	0	2	0	3	1	0	1	1	5	6	6	5	5	5	3	4	4
2	18	4	1	4	3	4	1	1	1	1	6	1	1	6	4	4	4	4	4	4	4	4	1	0	0	0	0	0	0	0	0	0	0	2	0	2	0	0	0	0	6	6	6	#NULL!	6	6	#NULL!	5	5
1	30	7	2	4	1	1	1	4	4	2	2	2	1	6	4	4	4	1	4	3	4	3	0	0	0	0	0	0	0	0	0	0	0	2	1	3	1	0	1	1	3	3	5	5	5	6	#NULL!	5	5
2	27	7	2	2	2	1	1	2	1	1	2	1	3	6	4	3	3	3	3	3	4	3	0	0	0	0	0	0	0	0	0	0	0	1	0	3	1	1	0	1	5	6	6	5	6	4	#NULL!	5	4
2	33	9	4	1	2	1	1	1	5	1	1	3	3	5	3	3	3	2	2	2	4	3	1	0	0	0	0	0	0	1	1	0	0	2	0	3	0	1	0	1	6	2	6	6	4	4	2	4	4
2	26	7	1	4	2	1	1	3	2	2	2	3	2	6	4	4	4	4	2	2	3	3	1	0	0	0	0	0	0	0	0	0	0	1	0	3	0	0	0	1	4	5	5	5	4	5	#NULL!	5	5
1	23	8	1	4	2	3	1	6	1	6	6	5	2	6	3	3	4	3	2	3	4	4	0	0	0	0	0	0	0	0	0	0	0	2	1	3	0	0	0	0	#NULL!	6	#NULL!	#NULL!	2	5	#NULL!	4	4
1	26	3	2	4	3	2	1	5	1	3	6	6	6	6	3	1	3	3	2	2	3	1	0	0	0	0	0	0	0	0	0	1	1	2	1	1	1	0	0	1	2	6	4	#NULL!	#NULL!	#NULL!	#NULL!	4	1
2	21	8	1	2	2	4	1	3	1	1	6	3	4	5	4	4	4	3	3	3	3	3	1	0	0	0	0	0	0	0	0	0	0	2	0	3	0	1	0	0	4	6	6	#NULL!	4	3	2	5	5
2	21	4	1	2	2	4	1	2	2	1	3	3	1	4	3	3	2	3	3	3	3	3	0	0	0	0	1	0	0	0	0	0	0	1	0	2	0	1	0	0	5	5	6	4	4	6	3	4	4
2	22	7	1	2	1	2	1	6	2	1	6	6	2	6	3	3	3	3	3	3	3	3	1	0	0	0	0	0	0	0	0	0	0	2	0	3	0	1	1	1	#NULL!	5	6	#NULL!	#NULL!	5	#NULL!	4	4
2	33	7	2	1	2	1	1	1	2	2	1	1	4	6	4	3	3	3	3	3	3	3	1	0	1	0	0	0	0	0	1	0	0	1	0	3	1	1	0	1	6	5	5	6	6	3	#NULL!	5	4
2	20	8	1	2	1	4	1	4	2	2	5	1	3	4	3	3	3	3	3	3	4	4	0	0	0	0	0	0	0	0	0	0	0	1	0	3	0	1	1	0	3	5	5	2	6	4	3	4	4
2	29	4	2	4	3	1	1	1	1	1	6	1	3	6	2	3	3	3	3	3	3	3	0	0	0	0	0	0	0	0	0	0	0	2	0	2	1	0	0	1	6	6	6	#NULL!	6	4	#NULL!	2	4
2	19	4	1	4	2	4	1	4	2	3	6	3	6	6	3	3	3	3	3	3	3	3	0	0	0	0	0	0	0	0	0	0	0	2	0	2	0	0	0	0	3	5	4	#NULL!	4	#NULL!	#NULL!	4	4
1	22	8	1	2	1	4	1	1	1	3	6	3	4	6	4	3	3	3	3	3	3	3	0	0	0	0	0	0	0	0	0	0	0	2	1	3	0	1	1	0	6	6	4	#NULL!	4	3	#NULL!	5	4
2	30	3	2	4	3	1	1	6	1	1	6	6	4	6	3	3	3	3	2	3	4	3	0	0	0	0	0	0	0	0	0	0	0	2	0	1	1	0	0	1	#NULL!	6	6	#NULL!	#NULL!	3	#NULL!	4	4
2	24	8	1	2	2	4	1	2	1	1	3	1	3	3	3	3	2	3	2	2	3	3	0	0	0	0	0	0	0	0	0	0	0	2	0	3	0	1	0	0	5	6	6	4	6	4	4	4	4
2	19	7	1	2	1	4	1	3	2	1	6	3	3	6	4	3	3	3	2	3	3	3	1	0	0	0	0	0	0	0	0	0	0	2	0	3	0	1	1	0	4	5	6	#NULL!	4	4	#NULL!	5	4
1	35	8	1	4	2	1	1	1	1	1	1	2	2	4	3	2	3	3	3	3	3	3	1	0	0	0	0	0	0	1	0	0	0	1	1	3	0	0	0	1	6	6	6	6	5	5	3	4	2
1	21	8	1	2	3	4	1	1	1	2	3	3	2	2	3	3	3	3	2	2	3	2	0	1	0	0	0	0	0	0	0	0	0	2	1	3	0	1	0	0	6	6	5	4	4	5	5	4	4
2	34	7	2	2	3	3	1	1	1	1	6	2	4	6	3	3	2	2	2	1	1	2	0	0	1	0	0	0	0	0	0	0	0	1	0	3	1	1	0	0	6	6	6	#NULL!	5	3	#NULL!	4	4
2	18	4	1	2	1	4	1	2	2	2	6	2	2	6	4	4	4	4	4	4	4	4	0	0	0	0	0	0	0	0	0	0	0	2	0	2	0	1	1	0	5	5	5	#NULL!	5	5	#NULL!	5	5
1	21	8	1	2	1	4	1	1	1	1	1	1	3	3	3	4	4	4	3	3	4	4	1	0	0	0	0	0	0	0	0	0	0	2	1	3	0	1	1	0	6	6	6	6	6	4	4	4	5
1	24	7	1	2	1	3	1	1	1	1	2	1	2	6	3	2	3	4	2	2	3	2	1	0	0	0	0	0	0	0	0	0	0	2	1	3	0	1	1	0	6	6	6	5	6	5	#NULL!	4	2
1	31	4	1	4	1	1	1	6	1	2	2	5	4	6	4	4	4	2	2	2	3	3	0	0	0	0	0	0	0	0	0	0	0	2	1	2	0	0	1	1	#NULL!	6	5	5	2	3	#NULL!	5	5
2	22	8	1	2	2	3	1	2	1	1	3	4	2	2	3	4	4	3	2	2	3	2	1	0	0	0	0	0	0	0	0	0	1	2	0	3	0	1	0	0	5	6	6	4	3	5	5	4	5
2	23	8	2	2	1	2	1	2	1	1	2	2	3	6	1	4	4	4	3	3	3	3	0	0	0	0	0	0	0	0	0	0	0	2	0	3	1	1	1	1	5	6	6	5	5	4	#NULL!	1	5
2	20	8	1	4	3	4	1	3	2	1	6	6	2	3	3	4	3	3	3	3	3	3	0	0	0	0	0	0	0	0	1	0	0	2	0	3	0	0	0	0	4	5	6	#NULL!	#NULL!	5	4	4	5
2	23	8	1	2	2	1	1	3	1	1	1	3	2	2	4	4	3	3	2	2	3	3	1	0	0	0	0	0	0	0	0	0	0	2	0	3	0	1	0	1	4	6	6	6	4	5	5	5	5
2	23	8	1	2	1	4	1	1	1	1	6	6	1	6	4	4	3	3	3	3	3	2	0	0	0	0	0	0	0	0	0	0	0	2	0	3	0	1	1	0	6	6	6	#NULL!	#NULL!	6	#NULL!	5	5
2	26	3	2	4	1	3	1	6	1	1	6	6	4	6	3	3	3	4	3	2	4	3	0	0	0	0	0	0	0	0	0	0	0	2	0	1	1	0	1	0	#NULL!	6	6	#NULL!	#NULL!	3	#NULL!	4	4
1	19	4	1	4	1	4	1	2	1	1	6	2	1	6	3	3	3	3	3	3	3	3	1	0	0	0	0	0	0	0	0	0	0	2	1	2	0	0	1	0	5	6	6	#NULL!	5	6	#NULL!	4	4
2	32	3	2	4	1	1	1	3	1	3	6	4	4	6	-1	-1	-1	-1	2	-1	-1	2	0	0	0	0	0	0	0	0	0	0	0	2	0	1	1	0	1	1	4	6	4	#NULL!	3	3	#NULL!	3	3
1	31	5	1	4	3	1	1	2	2	2	2	2	2	6	4	4	4	4	4	4	4	4	0	0	0	0	0	0	0	0	0	0	0	1	1	2	0	0	0	1	5	5	5	5	5	5	#NULL!	5	5
2	29	3	2	4	3	3	1	6	1	1	6	6	3	6	3	3	3	3	3	3	3	3	0	0	0	0	0	0	0	0	0	0	0	2	0	1	1	0	0	0	#NULL!	6	6	#NULL!	#NULL!	4	#NULL!	4	4
2	33	3	2	4	1	2	1	1	3	1	2	4	3	6	2	3	4	3	4	3	4	2	0	0	0	0	0	0	0	0	0	0	0	2	0	1	1	0	1	1	6	4	6	5	3	4	#NULL!	2	4
2	23	4	2	4	3	2	1	1	4	2	6	6	2	6	4	4	4	4	3	4	4	3	0	0	0	0	0	0	0	0	0	1	0	2	0	2	1	0	0	1	6	3	5	#NULL!	#NULL!	5	#NULL!	5	5
1	30	9	1	4	1	4	1	2	3	1	1	1	5	6	4	3	4	3	2	2	2	1	1	0	0	0	0	0	0	0	0	0	0	2	1	3	0	0	1	0	5	4	6	6	6	2	#NULL!	5	4
1	33	8	2	1	3	1	1	1	2	1	1	2	3	5	3	3	3	3	3	2	3	2	0	0	0	0	1	0	0	0	1	0	0	1	1	3	1	1	0	1	6	5	6	6	5	4	2	4	4
2	24	5	2	4	1	3	1	2	2	2	6	6	2	6	3	3	3	4	3	3	3	2	0	0	0	0	0	0	0	0	0	0	0	1	0	2	1	0	1	0	5	5	5	#NULL!	#NULL!	5	#NULL!	4	4
1	32	3	2	4	1	1	1	2	1	1	1	1	3	6	4	3	3	3	3	3	3	3	0	0	0	0	0	0	0	0	0	0	0	1	1	1	1	0	1	1	5	6	6	6	6	4	#NULL!	5	4
2	35	8	2	4	2	2	1	1	1	1	1	1	1	6	3	3	3	3	3	3	3	3	0	0	0	0	0	0	0	0	0	0	0	2	0	3	1	0	0	1	6	6	6	6	6	6	#NULL!	4	4
1	18	4	1	4	1	4	1	2	1	1	6	2	3	6	4	4	3	3	-1	2	3	3	1	0	0	0	0	0	0	0	0	0	0	2	1	2	0	0	1	0	5	6	6	#NULL!	5	4	#NULL!	5	5
1	29	5	1	4	3	1	1	2	2	2	2	2	2	6	3	3	3	3	3	3	3	3	0	0	0	0	0	0	0	0	0	0	0	2	1	2	0	0	0	1	5	5	5	5	5	5	#NULL!	4	4
2	26	7	2	4	1	2	1	1	1	1	1	1	1	1	3	3	3	3	3	3	3	3	0	0	0	0	0	0	0	0	0	0	0	2	0	3	1	0	1	1	6	6	6	6	6	6	6	4	4
2	34	3	2	4	1	1	1	6	1	6	6	6	4	6	1	4	3	3	3	3	3	-1	0	0	0	0	0	0	0	0	0	0	0	2	0	1	1	0	1	1	#NULL!	6	#NULL!	#NULL!	#NULL!	3	#NULL!	1	5
2	30	3	2	4	1	1	1	6	1	1	6	1	3	6	3	3	3	3	3	2	2	2	0	0	0	0	0	0	0	0	0	0	0	2	0	1	1	0	1	1	#NULL!	6	6	#NULL!	6	4	#NULL!	4	4
2	22	8	1	1	2	1	1	4	1	1	1	3	1	6	4	4	3	3	3	2	3	3	1	0	0	0	0	0	0	0	0	0	0	1	0	3	0	1	0	1	3	6	6	6	4	6	#NULL!	5	5
2	31	7	2	4	1	1	1	2	1	2	1	1	2	4	4	4	4	4	3	3	4	4	0	0	0	0	0	0	0	0	0	0	0	2	0	3	1	0	1	1	5	6	5	6	6	5	3	5	5
2	32	8	2	4	2	1	1	3	1	3	1	5	2	6	3	3	3	3	2	2	2	2	0	0	0	0	0	0	0	0	0	0	0	1	0	3	1	0	0	1	4	6	4	6	2	5	#NULL!	4	4
2	29	2	2	4	2	3	1	6	1	1	6	6	2	6	-1	2	2	-1	2	2	3	2	0	0	0	0	0	0	0	0	0	0	0	1	0	1	1	0	0	0	#NULL!	6	6	#NULL!	#NULL!	5	#NULL!	3	2
1	22	8	1	1	2	4	1	1	1	1	1	1	1	6	4	4	4	4	2	2	4	2	1	0	0	0	0	0	0	1	1	0	0	1	1	3	0	1	0	0	6	6	6	6	6	6	#NULL!	5	5
1	33	8	2	4	3	1	1	1	3	1	1	3	3	2	3	2	3	3	3	1	2	1	1	0	0	0	0	0	0	0	1	0	0	2	1	3	1	0	0	1	6	4	6	6	4	4	5	4	2
2	31	9	2	1	2	2	1	1	1	1	1	1	1	1	4	3	3	3	3	3	3	3	1	0	0	0	0	0	0	0	0	0	1	2	0	3	1	1	0	1	6	6	6	6	6	6	6	5	4
1	33	7	2	4	1	1	1	1	4	1	1	1	2	2	4	3	3	2	3	3	2	1	1	0	0	0	0	0	0	0	0	0	0	2	1	3	1	0	1	1	6	3	6	6	6	5	5	5	4
1	24	8	1	2	1	4	1	2	1	1	6	3	3	6	4	4	4	4	3	3	3	3	1	0	0	0	0	0	0	0	1	0	0	1	1	3	0	1	1	0	5	6	6	#NULL!	4	4	#NULL!	5	5
1	33	7	1	3	2	1	1	6	4	1	1	4	3	5	4	1	1	3	1	4	3	2	0	0	1	0	0	0	0	0	1	0	1	2	1	3	0	1	0	1	#NULL!	3	6	6	3	4	2	5	1
2	20	7	1	2	1	4	1	2	2	1	5	1	2	5	4	4	4	4	4	4	4	4	1	0	0	0	0	0	0	0	0	0	0	2	0	3	0	1	1	0	5	5	6	2	6	5	2	5	5
2	27	2	2	4	1	3	1	1	2	2	6	2	3	6	3	3	3	3	3	4	4	3	0	0	0	0	0	0	0	0	0	0	0	2	0	1	1	0	1	0	6	5	5	#NULL!	5	4	#NULL!	4	4
2	23	8	1	1	1	1	1	2	1	4	1	2	4	5	4	4	4	3	3	2	3	2	0	0	0	0	0	0	0	0	1	0	0	1	0	3	0	1	1	1	5	6	3	6	5	3	2	5	5
1	29	3	1	4	1	1	1	2	2	1	1	1	4	6	3	3	3	3	2	2	3	3	0	0	0	0	0	0	0	0	0	0	0	2	1	1	0	0	1	1	5	5	6	6	6	3	#NULL!	4	4
2	31	4	2	4	1	3	1	6	1	4	6	6	2	6	3	3	3	3	3	3	3	3	0	0	0	0	0	0	0	0	0	0	0	2	0	2	1	0	1	0	#NULL!	6	3	#NULL!	#NULL!	5	#NULL!	4	4
2	24	5	2	4	1	3	1	2	1	1	6	5	2	6	4	4	4	3	3	3	3	3	0	0	0	0	0	0	0	0	0	0	0	1	0	2	1	0	1	0	5	6	6	#NULL!	2	5	#NULL!	5	5
2	30	3	2	4	1	1	1	5	5	1	6	6	3	6	3	3	3	3	3	2	2	2	0	0	0	0	0	0	0	0	0	0	0	2	0	1	1	0	1	1	2	2	6	#NULL!	#NULL!	4	#NULL!	4	4
2	29	5	2	4	1	3	1	1	1	3	6	3	4	6	4	3	3	3	2	3	3	3	0	0	0	0	0	0	0	0	0	0	0	2	0	2	1	0	1	0	6	6	4	#NULL!	4	3	#NULL!	5	4
2	30	8	2	4	1	3	1	2	2	2	6	3	2	6	3	3	3	3	3	3	3	2	1	0	0	0	0	0	0	0	1	0	1	2	0	3	1	0	1	0	5	5	5	#NULL!	4	5	#NULL!	4	4
1	35	3	2	4	2	1	1	3	1	3	6	6	2	5	4	3	3	3	3	2	2	2	0	0	0	0	0	0	0	0	0	0	0	2	1	1	1	0	0	1	4	6	4	#NULL!	#NULL!	5	2	5	4
2	31	5	2	4	1	3	1	1	1	1	6	2	1	6	3	3	3	4	3	3	3	3	0	0	0	0	0	0	0	0	0	0	0	2	0	2	1	0	1	0	6	6	6	#NULL!	5	6	#NULL!	4	4
2	28	8	1	4	1	1	1	2	1	1	1	1	1	1	4	4	4	4	3	2	3	3	1	0	0	0	0	0	0	0	0	0	0	1	0	3	0	0	1	1	5	6	6	6	6	6	6	5	5
2	21	8	1	2	2	4	1	1	1	1	6	3	2	3	4	3	4	4	2	2	2	2	0	1	0	0	0	0	0	0	0	0	0	2	0	3	0	1	0	0	6	6	6	#NULL!	4	5	4	5	4
2	32	8	2	4	3	1	1	1	1	3	1	2	4	5	4	2	3	3	3	3	3	3	1	0	0	0	0	0	0	0	0	0	0	2	0	3	1	0	0	1	6	6	4	6	5	3	2	5	2
2	26	3	2	1	1	3	1	1	2	1	6	3	3	6	4	3	3	3	2	1	3	2	1	0	0	0	0	0	0	1	0	0	0	2	0	1	1	1	1	0	6	5	6	#NULL!	4	4	#NULL!	5	4
2	23	8	1	1	3	1	1	1	1	1	1	2	2	6	4	3	4	4	3	3	3	3	0	0	0	0	0	0	0	0	1	0	0	2	0	3	0	1	0	1	6	6	6	6	5	5	#NULL!	5	4
2	25	4	2	4	1	3	1	1	1	1	6	6	3	6	3	3	3	3	4	3	3	3	0	0	0	0	0	0	0	0	0	0	0	1	0	2	1	0	1	0	6	6	6	#NULL!	#NULL!	4	#NULL!	4	4
2	28	8	2	4	2	1	1	1	1	1	1	2	1	1	3	3	3	3	3	2	2	2	1	0	1	0	0	0	0	0	0	0	0	2	0	3	1	0	0	1	6	6	6	6	5	6	6	4	4
2	19	8	1	2	1	4	1	1	1	1	6	3	2	1	4	4	3	3	3	3	3	3	0	0	0	0	0	0	0	0	0	0	0	1	0	3	0	1	1	0	6	6	6	#NULL!	4	5	6	5	5
2	34	3	2	4	3	3	1	2	1	2	3	1	5	6	3	2	3	2	3	2	4	3	0	0	1	0	1	0	0	1	0	0	0	1	0	1	1	0	0	0	5	6	5	4	6	2	#NULL!	4	2
2	26	8	1	2	1	1	1	2	1	1	3	5	2	6	3	3	3	3	3	3	3	2	0	0	0	0	0	0	0	0	0	0	0	2	0	3	0	1	1	1	5	6	6	4	2	5	#NULL!	4	4
2	21	8	1	2	1	4	1	3	1	1	6	4	3	6	4	3	3	3	2	2	3	2	0	0	0	0	0	0	0	0	0	0	0	2	0	3	0	1	1	0	4	6	6	#NULL!	3	4	#NULL!	5	4
2	26	9	1	2	2	4	1	1	1	2	6	1	2	6	4	3	3	3	3	3	3	3	0	0	0	0	0	0	0	0	0	0	0	2	0	3	0	1	0	0	6	6	5	#NULL!	6	5	#NULL!	5	4
2	28	3	2	4	1	1	1	6	1	1	1	1	3	6	4	3	3	3	3	3	3	3	0	0	0	0	0	0	0	0	0	0	0	2	0	1	1	0	1	1	#NULL!	6	6	6	6	4	#NULL!	5	4
1	25	8	1	4	3	1	1	2	2	1	2	6	4	6	4	4	4	4	3	3	4	3	0	0	0	0	0	0	0	0	0	0	0	2	1	3	0	0	0	1	5	5	6	5	#NULL!	3	#NULL!	5	5
2	24	7	2	4	2	3	1	1	1	1	6	3	1	2	4	4	4	3	3	3	2	2	1	0	0	0	0	0	0	0	0	0	0	2	0	3	1	0	0	0	6	6	6	#NULL!	4	6	5	5	5
1	19	8	1	2	1	4	1	2	2	1	6	4	3	6	3	4	4	3	3	3	3	3	0	0	0	0	0	0	0	0	0	0	0	2	1	3	0	1	1	0	5	5	6	#NULL!	3	4	#NULL!	4	5
2	18	8	1	2	1	4	1	1	1	1	6	1	2	6	4	4	4	4	3	3	3	3	1	0	0	0	0	0	0	0	0	0	0	2	0	3	0	1	1	0	6	6	6	#NULL!	6	5	#NULL!	5	5
1	24	9	1	2	2	4	1	3	2	1	1	1	4	6	2	3	3	3	3	1	3	1	0	0	0	0	0	0	0	0	0	0	0	1	1	3	0	1	0	0	4	5	6	6	6	3	#NULL!	2	4
1	24	9	1	2	1	4	1	2	1	1	1	1	3	5	4	3	4	4	2	2	3	2	0	0	0	0	0	0	0	1	0	0	0	2	1	3	0	1	1	0	5	6	6	6	6	4	2	5	4
2	25	3	2	4	4	3	1	1	1	1	1	2	1	6	3	4	3	3	3	2	3	2	0	0	0	0	0	0	0	0	0	0	0	1	0	1	1	0	0	0	6	6	6	6	5	6	#NULL!	4	5
2	29	4	2	4	1	1	1	5	1	2	1	6	4	4	3	3	3	3	3	3	3	2	0	0	0	0	0	0	0	0	0	0	0	2	0	2	1	0	1	1	2	6	5	6	#NULL!	3	3	4	4
2	23	7	1	4	1	1	1	3	1	1	1	2	3	3	3	2	3	3	2	2	2	2	1	0	0	0	0	0	0	0	0	0	0	2	0	3	0	0	1	1	4	6	6	6	5	4	4	4	2
2	28	3	2	4	1	3	1	1	1	1	6	6	2	6	3	3	3	4	4	4	4	4	0	0	0	0	0	0	0	0	0	0	0	2	0	1	1	0	1	0	6	6	6	#NULL!	#NULL!	5	#NULL!	4	4
2	30	3	2	4	1	3	1	2	2	2	6	6	4	6	3	3	3	3	3	3	3	3	0	0	0	0	0	0	0	0	0	0	0	2	0	1	1	0	1	0	5	5	5	#NULL!	#NULL!	3	#NULL!	4	4
1	24	8	1	1	1	3	1	1	1	2	6	1	3	6	4	4	4	4	4	4	4	4	0	0	0	0	0	0	0	0	0	0	0	2	1	3	0	1	1	0	6	6	5	#NULL!	6	4	#NULL!	5	5
2	34	7	2	4	1	3	1	3	1	2	6	4	3	6	3	3	3	3	3	3	3	3	0	0	0	0	0	0	0	0	0	0	0	2	0	3	1	0	1	0	4	6	5	#NULL!	3	4	#NULL!	4	4
2	23	5	1	1	3	1	1	3	2	2	1	1	3	4	3	3	3	3	3	2	3	2	0	0	0	0	0	0	0	0	0	0	0	2	0	2	0	1	0	1	4	5	5	6	6	4	3	4	4
1	21	7	1	1	2	1	1	1	1	2	1	2	1	5	4	4	4	3	3	2	4	3	0	0	0	0	0	1	0	0	1	0	1	1	1	3	0	1	0	1	6	6	5	6	5	6	2	5	5
1	31	2	2	4	1	3	1	4	2	1	6	6	3	6	4	3	4	3	3	2	3	2	0	0	0	0	0	0	0	0	0	0	0	1	1	1	1	0	1	0	3	5	6	#NULL!	#NULL!	4	#NULL!	5	4
2	33	3	2	4	1	1	1	1	1	4	6	4	3	6	2	3	4	3	3	3	3	2	0	0	0	0	0	0	0	1	0	0	0	2	0	1	1	0	1	1	6	6	3	#NULL!	3	4	#NULL!	2	4
1	26	8	1	2	2	2	1	1	1	1	6	1	4	6	4	3	3	2	2	2	3	3	1	0	0	0	0	0	0	0	0	0	0	2	1	3	0	1	0	1	6	6	6	#NULL!	6	3	#NULL!	5	4
2	34	5	2	4	1	3	1	2	1	1	6	6	2	6	3	3	3	3	3	2	3	3	0	0	0	0	0	0	0	0	0	0	0	2	0	2	1	0	1	0	5	6	6	#NULL!	#NULL!	5	#NULL!	4	4
1	21	8	1	4	2	4	1	1	1	1	1	1	1	1	4	3	4	3	2	2	4	3	1	1	0	0	0	0	0	0	0	0	0	2	1	3	0	0	0	0	6	6	6	6	6	6	6	5	4
2	27	3	2	4	4	3	1	1	1	1	6	6	4	6	3	3	3	3	2	2	3	3	0	0	0	0	0	0	0	0	0	0	0	2	0	1	1	0	0	0	6	6	6	#NULL!	#NULL!	3	#NULL!	4	4
2	35	3	2	4	3	3	1	5	4	1	6	1	4	6	3	3	3	3	2	2	3	3	0	0	0	0	0	0	0	0	0	0	0	2	0	1	1	0	0	0	2	3	6	#NULL!	6	3	#NULL!	4	4
2	33	8	2	1	3	1	1	2	1	1	3	2	2	2	4	4	4	3	3	3	3	3	1	0	1	0	0	0	0	0	0	0	0	2	0	3	1	1	0	1	5	6	6	4	5	5	5	5	5
2	35	3	4	4	1	3	1	5	1	1	6	1	4	6	2	3	4	3	2	2	3	2	1	0	0	0	0	0	0	1	0	0	0	1	0	1	0	0	1	0	2	6	6	#NULL!	6	3	#NULL!	2	4
2	33	7	2	4	3	1	1	5	1	1	6	6	3	6	4	4	4	3	2	2	3	3	1	0	0	0	0	0	0	0	0	0	0	2	0	3	1	0	0	1	2	6	6	#NULL!	#NULL!	4	#NULL!	5	5
2	32	2	3	4	1	3	1	6	1	1	6	6	6	6	4	3	1	1	1	1	1	1	0	0	0	0	0	0	0	0	0	0	0	2	0	1	1	0	1	0	#NULL!	6	6	#NULL!	#NULL!	#NULL!	#NULL!	5	4
1	33	3	2	4	1	1	1	1	3	2	1	5	1	5	3	1	3	3	4	3	3	3	0	0	0	1	0	0	0	0	0	1	0	1	1	1	1	0	1	1	6	4	5	6	2	6	2	4	1
2	29	3	2	4	3	3	1	1	1	1	6	1	1	6	3	2	3	3	3	3	3	3	0	0	0	0	0	0	0	0	0	0	0	1	0	1	1	0	0	0	6	6	6	#NULL!	6	6	#NULL!	4	2
1	25	5	2	4	1	1	1	1	1	1	3	3	4	6	3	2	2	3	3	2	3	3	0	0	0	0	0	0	0	0	0	0	0	1	1	2	1	0	1	1	6	6	6	4	4	3	#NULL!	4	2
2	22	8	1	1	3	3	1	1	1	1	6	1	2	6	3	3	3	3	2	2	3	2	1	0	0	0	1	0	0	0	0	0	0	2	0	3	0	1	0	0	6	6	6	#NULL!	6	5	#NULL!	4	4
2	25	5	2	4	1	3	1	5	3	3	6	5	3	6	3	3	3	3	3	3	3	3	1	0	0	0	0	0	0	0	0	0	0	2	0	2	1	0	1	0	2	4	4	#NULL!	2	4	#NULL!	4	4
1	19	8	1	2	1	4	1	2	2	1	6	4	3	4	3	2	2	3	3	3	3	2	0	0	0	0	0	0	0	1	0	0	0	2	1	3	0	1	1	0	5	5	6	#NULL!	3	4	3	4	2
1	22	8	1	4	1	3	1	1	1	1	6	2	3	6	4	4	4	3	3	3	3	3	0	0	0	0	0	0	0	0	0	0	0	2	1	3	0	0	1	0	6	6	6	#NULL!	5	4	#NULL!	5	5
2	32	7	2	1	1	3	1	3	3	1	6	1	1	6	4	4	4	3	3	3	4	3	0	0	0	0	0	0	0	1	0	0	0	1	0	3	1	1	1	0	4	4	6	#NULL!	6	6	#NULL!	5	5
2	20	8	1	2	1	4	1	3	2	1	6	1	4	6	1	3	4	3	2	1	3	2	1	0	0	1	0	0	0	0	0	0	0	1	0	3	0	1	1	0	4	5	6	#NULL!	6	3	#NULL!	1	4
1	18	5	1	4	3	4	1	2	1	1	5	2	2	6	4	4	4	4	3	3	4	3	1	0	0	0	0	0	0	0	0	0	0	2	1	2	0	0	0	0	5	6	6	2	5	5	#NULL!	5	5
2	32	3	2	4	3	3	1	3	2	2	6	2	3	6	2	3	3	3	3	3	3	3	0	0	0	0	0	0	0	0	0	1	0	1	0	1	1	0	0	0	4	5	5	#NULL!	5	4	#NULL!	2	4
1	18	4	1	4	1	4	1	2	1	1	6	1	4	6	4	3	3	3	2	2	2	3	1	0	1	0	0	0	0	0	0	0	0	1	1	2	0	0	1	0	5	6	6	#NULL!	6	3	#NULL!	5	4
1	23	8	1	1	3	2	1	1	1	1	1	2	1	2	4	4	4	4	3	2	3	3	1	0	0	0	0	0	0	0	0	0	0	2	1	3	0	1	0	1	6	6	6	6	5	6	5	5	5
2	19	7	1	4	3	1	1	6	2	1	3	6	3	6	4	3	-1	4	-1	-1	4	4	0	0	0	0	0	0	0	0	0	0	0	2	0	3	0	0	0	1	#NULL!	5	6	4	#NULL!	4	#NULL!	5	4
2	28	3	2	1	1	3	1	2	1	1	6	6	2	6	4	4	4	4	4	4	4	3	0	0	0	0	0	0	0	0	0	0	0	2	0	1	1	1	1	0	5	6	6	#NULL!	#NULL!	5	#NULL!	5	5
2	33	3	3	4	1	3	1	6	5	1	6	4	3	6	3	3	3	3	2	2	3	2	0	0	0	0	0	0	0	0	0	0	0	2	0	1	1	0	1	0	#NULL!	2	6	#NULL!	3	4	#NULL!	4	4
2	25	8	1	2	1	2	1	2	1	1	6	2	2	5	4	4	4	3	3	2	4	3	1	0	0	1	1	0	0	0	1	0	0	2	0	3	0	1	1	1	5	6	6	#NULL!	5	5	2	5	5
2	19	4	1	4	1	4	1	2	2	2	6	1	4	6	3	4	4	4	3	3	4	3	0	0	0	0	0	0	0	0	1	0	0	2	0	2	0	0	1	0	5	5	5	#NULL!	6	3	#NULL!	4	5
2	20	4	1	2	1	4	1	2	2	2	1	1	4	6	4	3	3	4	4	3	3	4	0	0	0	0	0	0	0	0	0	0	0	2	0	2	0	1	1	0	5	5	5	6	6	3	#NULL!	5	4
1	28	3	2	4	1	1	1	6	1	1	6	6	3	6	3	3	3	3	2	3	3	3	0	0	0	0	0	0	0	0	0	0	0	2	1	1	1	0	1	1	#NULL!	6	6	#NULL!	#NULL!	4	#NULL!	4	4
2	33	2	2	4	1	1	1	2	2	2	6	2	2	6	3	1	1	1	1	1	2	2	0	0	0	0	0	0	0	0	0	0	0	1	0	1	1	0	1	1	5	5	5	#NULL!	5	5	#NULL!	4	1
2	32	7	2	4	2	1	1	3	1	1	6	3	2	5	3	3	3	3	3	3	3	3	0	0	0	0	0	0	0	1	1	0	0	1	0	3	1	0	0	1	4	6	6	#NULL!	4	5	2	4	4
1	27	3	1	4	1	1	1	5	3	1	1	6	2	6	3	3	3	3	3	3	3	3	0	0	0	0	0	0	0	0	0	0	0	1	1	1	0	0	1	1	2	4	6	6	#NULL!	5	#NULL!	4	4
2	20	8	1	2	2	4	1	2	1	1	6	2	2	6	3	3	3	3	2	3	3	3	1	0	0	0	0	0	0	0	0	0	0	2	0	3	0	1	0	0	5	6	6	#NULL!	5	5	#NULL!	4	4
2	21	8	1	1	1	4	1	1	2	1	6	1	3	6	4	3	3	3	2	2	3	2	0	0	0	0	0	0	0	0	0	0	0	2	0	3	0	1	1	0	6	5	6	#NULL!	6	4	#NULL!	5	4
2	24	8	1	2	3	1	1	5	1	1	1	3	1	4	3	3	3	3	2	1	3	2	0	0	0	0	0	0	0	0	0	0	0	2	0	3	0	1	0	1	2	6	6	6	4	6	3	4	4
2	26	7	2	4	1	3	1	5	4	1	6	2	2	6	4	3	3	3	2	3	3	3	1	0	0	0	0	0	0	0	0	0	0	2	0	3	1	0	1	0	2	3	6	#NULL!	5	5	#NULL!	5	4
2	22	8	1	2	1	4	1	2	2	1	6	2	4	4	4	3	3	3	3	2	2	2	0	0	0	0	0	0	0	0	0	0	0	2	0	3	0	1	1	0	5	5	6	#NULL!	5	3	3	5	4
1	20	7	1	2	1	4	1	3	1	1	2	1	3	6	3	4	3	3	3	3	3	3	0	0	0	0	0	0	0	0	0	0	0	2	1	3	0	1	1	0	4	6	6	5	6	4	#NULL!	4	5
2	30	3	2	4	1	3	1	3	2	2	5	1	2	6	2	2	3	2	-1	3	2	2	0	0	0	0	0	0	0	0	0	0	0	2	0	1	1	0	1	0	4	5	5	2	6	5	#NULL!	2	2
1	20	6	1	4	1	4	1	5	3	2	6	6	4	6	3	3	3	3	2	1	3	3	1	0	0	0	0	0	0	1	0	0	0	2	1	2	0	0	1	0	2	4	5	#NULL!	#NULL!	3	#NULL!	4	4
2	24	5	2	4	1	3	1	3	1	1	6	1	3	6	4	4	4	4	4	4	4	4	0	0	0	0	0	0	0	0	0	0	0	1	0	2	1	0	1	0	4	6	6	#NULL!	6	4	#NULL!	5	5
2	18	4	1	4	1	4	1	5	1	1	6	1	3	6	3	4	4	4	3	3	3	3	0	0	0	0	0	0	0	0	1	0	0	2	0	2	0	0	1	0	2	6	6	#NULL!	6	4	#NULL!	4	5
2	35	4	2	4	3	3	1	4	3	1	1	1	3	6	3	3	3	3	3	3	3	3	1	0	0	0	1	0	0	1	1	0	0	1	0	2	1	0	0	0	3	4	6	6	6	4	#NULL!	4	4
2	25	3	2	4	1	3	1	6	1	1	6	6	4	6	4	4	4	4	3	4	4	3	0	0	0	0	0	0	0	0	0	0	0	2	0	1	1	0	1	0	#NULL!	6	6	#NULL!	#NULL!	3	#NULL!	5	5
2	19	8	1	2	3	4	1	1	1	1	6	1	1	6	3	3	3	3	3	3	3	3	0	0	0	0	0	0	0	0	0	0	0	2	0	3	0	1	0	0	6	6	6	#NULL!	6	6	#NULL!	4	4
2	35	3	2	1	1	1	1	1	3	1	2	3	3	6	2	3	4	3	4	3	3	2	0	0	0	0	0	0	0	1	0	0	0	1	0	1	1	1	1	1	6	4	6	5	4	4	#NULL!	2	4
2	34	8	2	1	2	1	1	2	2	2	2	5	2	2	4	4	3	1	3	1	2	2	1	0	1	0	0	0	0	1	1	0	0	1	0	3	1	1	0	1	5	5	5	5	2	5	5	5	5
1	33	3	2	4	1	1	1	1	6	6	6	5	6	6	3	4	4	3	3	3	3	3	0	0	0	0	0	0	0	0	0	0	0	2	1	1	1	0	1	1	6	#NULL!	#NULL!	#NULL!	2	#NULL!	#NULL!	4	5
2	33	2	2	4	1	2	1	1	1	1	6	2	6	6	3	4	3	4	4	4	3	3	0	0	0	0	0	0	0	0	0	0	0	2	0	1	1	0	1	1	6	6	6	#NULL!	5	#NULL!	#NULL!	4	5
1	20	4	1	2	2	4	1	2	1	1	6	2	4	6	4	4	4	4	3	2	3	3	1	0	0	0	0	0	0	0	0	0	0	2	1	2	0	1	0	0	5	6	6	#NULL!	5	3	#NULL!	5	5
2	19	4	1	2	1	4	1	2	4	1	6	2	4	6	3	3	3	3	3	3	3	2	0	0	0	0	0	0	0	0	0	0	0	2	0	2	0	1	1	0	5	3	6	#NULL!	5	3	#NULL!	4	4
1	19	4	1	4	4	4	1	4	2	1	6	3	2	6	4	4	4	4	3	3	4	4	0	0	0	0	0	0	0	0	0	0	0	2	1	2	0	0	0	0	3	5	6	#NULL!	4	5	#NULL!	5	5
2	31	3	2	4	1	3	1	6	3	3	6	6	4	6	4	3	4	3	2	2	2	1	0	0	0	0	0	0	0	0	0	0	0	2	0	1	1	0	1	0	#NULL!	4	4	#NULL!	#NULL!	3	#NULL!	5	4
2	31	3	2	4	3	3	1	2	1	1	6	2	2	6	2	2	3	3	2	2	1	1	0	0	0	0	0	0	0	0	0	0	0	2	0	1	1	0	0	0	5	6	6	#NULL!	5	5	#NULL!	2	2
2	21	8	1	1	3	4	1	1	1	1	6	1	6	6	3	3	4	4	4	4	4	4	0	0	0	0	0	0	0	0	0	0	0	2	0	3	0	1	0	0	6	6	6	#NULL!	6	#NULL!	#NULL!	4	4
1	18	4	1	4	1	4	1	2	1	2	6	2	4	6	4	3	3	3	3	3	3	3	0	0	0	0	0	0	0	0	0	0	0	2	1	2	0	0	1	0	5	6	5	#NULL!	5	3	#NULL!	5	4
2	34	3	2	4	1	1	1	2	3	2	6	2	3	6	3	4	3	3	3	3	4	3	0	0	0	0	0	0	0	0	0	0	0	1	0	1	1	0	1	1	5	4	5	#NULL!	5	4	#NULL!	4	5
2	33	4	4	4	2	1	1	2	2	2	2	6	3	6	3	3	3	3	3	3	3	3	0	0	0	0	0	0	0	0	0	0	0	2	0	2	0	0	0	1	5	5	5	5	#NULL!	4	#NULL!	4	4
2	34	7	4	4	2	3	1	3	1	1	6	3	3	6	3	3	3	3	3	3	3	3	0	0	0	0	0	0	0	0	0	0	0	2	0	3	0	0	0	0	4	6	6	#NULL!	4	4	#NULL!	4	4
2	29	2	2	4	1	2	1	1	6	2	6	6	4	6	3	3	-1	3	3	2	3	3	0	0	0	0	0	0	0	0	0	0	0	1	0	1	1	0	1	1	6	#NULL!	5	#NULL!	#NULL!	3	#NULL!	4	4
2	29	5	2	4	2	3	1	1	3	1	6	6	2	6	3	3	3	3	3	3	3	3	0	0	0	0	0	0	0	0	0	0	0	2	0	2	1	0	0	0	6	4	6	#NULL!	#NULL!	5	#NULL!	4	4
1	30	7	2	4	3	3	1	6	4	6	6	6	6	6	4	4	4	4	4	4	4	4	0	0	0	0	0	0	0	0	0	0	0	2	1	3	1	0	0	0	#NULL!	3	#NULL!	#NULL!	#NULL!	#NULL!	#NULL!	5	5
2	28	7	2	2	1	4	1	2	1	2	6	5	3	6	3	3	3	3	3	3	3	3	0	0	0	0	0	0	0	0	0	0	0	2	0	3	1	1	1	0	5	6	5	#NULL!	2	4	#NULL!	4	4
1	25	3	2	4	3	1	1	3	1	1	1	6	2	6	3	3	3	3	3	3	3	3	1	0	0	0	0	0	0	0	0	0	0	2	1	1	1	0	0	1	4	6	6	6	#NULL!	5	#NULL!	4	4
2	28	4	2	4	1	3	1	1	1	1	6	1	3	6	2	2	2	4	4	4	2	2	0	0	0	0	0	0	0	0	0	0	0	2	0	2	1	0	1	0	6	6	6	#NULL!	6	4	#NULL!	2	2
1	30	9	2	1	3	1	1	2	2	1	1	3	3	6	4	4	4	4	3	3	4	3	0	0	0	0	0	0	0	0	0	0	0	2	1	3	1	1	0	1	5	5	6	6	4	4	#NULL!	5	5
1	18	5	1	4	3	4	1	6	1	2	6	2	6	6	4	4	4	4	4	4	4	4	0	0	0	0	0	0	0	0	0	0	0	2	1	2	0	0	0	0	#NULL!	6	5	#NULL!	5	#NULL!	#NULL!	5	5
2	25	8	1	2	2	4	1	1	1	1	6	1	4	6	4	3	4	3	2	2	3	2	1	0	0	0	0	0	0	0	0	0	0	2	0	3	0	1	0	0	6	6	6	#NULL!	6	3	#NULL!	5	4
1	30	5	1	4	1	1	1	3	1	1	6	4	2	6	4	4	3	3	3	2	3	3	0	0	0	0	0	0	0	0	0	0	0	2	1	2	0	0	1	1	4	6	6	#NULL!	3	5	#NULL!	5	5
2	21	8	1	1	1	4	1	2	1	1	6	1	2	6	4	3	3	3	2	2	3	2	0	0	0	0	0	0	0	0	0	0	0	2	0	3	0	1	1	0	5	6	6	#NULL!	6	5	#NULL!	5	4
2	21	8	1	2	1	4	1	1	1	1	6	2	4	6	3	3	3	3	2	3	3	3	0	0	0	0	0	0	0	0	0	0	0	1	0	3	0	1	1	0	6	6	6	#NULL!	5	3	#NULL!	4	4
1	31	2	2	4	1	3	1	6	6	2	6	6	6	6	1	1	1	1	1	1	1	1	0	0	0	0	0	0	0	0	0	0	0	2	1	1	1	0	1	0	#NULL!	#NULL!	5	#NULL!	#NULL!	#NULL!	#NULL!	1	1
2	32	7	2	4	1	3	1	1	6	1	6	2	2	6	3	3	3	3	2	2	3	2	0	0	0	0	0	0	0	0	0	0	0	2	0	3	1	0	1	0	6	#NULL!	6	#NULL!	5	5	#NULL!	4	4
1	24	8	1	2	2	1	1	1	1	1	1	3	2	2	4	3	3	3	3	3	3	3	1	0	0	0	0	0	0	0	0	0	0	2	1	3	0	1	0	1	6	6	6	6	4	5	5	5	4
2	29	3	2	4	3	1	1	1	1	1	6	1	1	6	3	3	3	3	3	3	3	3	0	0	1	0	0	1	0	0	0	0	1	2	0	1	1	0	0	1	6	6	6	#NULL!	6	6	#NULL!	4	4
1	29	5	1	4	3	1	1	2	1	2	1	2	4	6	3	1	2	2	3	3	3	2	1	0	0	0	0	0	0	0	0	0	0	2	1	2	0	0	0	1	5	6	5	6	5	3	#NULL!	4	1
2	29	7	1	4	3	1	1	3	3	1	1	3	4	6	2	3	3	3	3	2	3	3	0	0	0	0	0	0	0	0	0	0	0	2	0	3	0	0	0	1	4	4	6	6	4	3	#NULL!	2	4
1	24	9	1	1	3	4	1	1	1	1	6	1	1	1	3	4	3	3	3	3	4	3	1	0	0	0	0	0	0	0	0	0	0	2	1	3	0	1	0	0	6	6	6	#NULL!	6	6	6	4	5
2	33	8	2	4	2	3	1	3	3	1	6	6	6	6	3	3	3	3	3	3	3	3	0	0	0	0	0	0	0	0	0	0	0	2	0	3	1	0	0	0	4	4	6	#NULL!	#NULL!	#NULL!	#NULL!	4	4
2	24	8	1	1	1	1	1	1	1	1	1	1	3	6	4	4	3	4	3	3	3	3	1	1	0	0	0	0	0	0	0	0	0	2	0	3	0	1	1	1	6	6	6	6	6	4	#NULL!	5	5
1	26	8	2	4	2	3	1	1	2	1	1	3	2	5	4	4	4	3	3	3	3	3	0	0	0	0	0	0	0	0	0	0	0	1	1	3	1	0	0	0	6	5	6	6	4	5	2	5	5
1	22	8	1	2	2	4	1	2	2	1	6	1	3	6	3	2	2	2	3	2	3	3	0	0	0	0	0	0	0	0	0	0	0	2	1	3	0	1	0	0	5	5	6	#NULL!	6	4	#NULL!	4	2
2	34	3	5	4	1	1	1	6	6	1	6	6	3	6	3	-1	-1	-1	1	2	-1	-1	0	0	0	0	0	0	0	0	1	0	0	2	0	1	0	0	1	1	#NULL!	#NULL!	6	#NULL!	#NULL!	4	#NULL!	4	3
2	23	8	1	1	3	1	1	1	1	1	1	1	2	6	4	3	3	3	3	3	3	3	0	0	0	0	0	0	0	0	0	0	0	1	0	3	0	1	0	1	6	6	6	6	6	5	#NULL!	5	4
2	22	7	2	2	1	1	1	1	1	1	6	1	1	3	4	4	3	3	3	3	3	3	0	0	0	0	0	0	0	0	0	0	0	1	0	3	1	1	1	1	6	6	6	#NULL!	6	6	4	5	5
2	31	4	2	4	1	3	1	5	2	1	3	4	3	6	4	4	4	4	4	4	4	4	0	0	0	0	0	0	0	0	0	0	0	2	0	2	1	0	1	0	2	5	6	4	3	4	#NULL!	5	5
2	31	8	2	1	3	2	1	5	3	1	1	1	2	3	3	3	3	3	3	2	3	2	0	0	0	0	0	0	0	0	0	0	0	1	0	3	1	1	0	1	2	4	6	6	6	5	4	4	4
2	31	5	2	4	2	3	1	5	5	1	6	1	4	6	3	3	2	2	2	1	3	3	1	1	0	0	0	0	0	0	1	0	0	2	0	2	1	0	0	0	2	2	6	#NULL!	6	3	#NULL!	4	4
2	20	8	1	2	1	4	1	3	1	1	3	2	2	6	4	3	3	3	3	3	3	3	0	1	0	0	0	0	0	0	0	0	0	2	0	3	0	1	1	0	4	6	6	4	5	5	#NULL!	5	4
1	26	8	1	4	2	1	1	2	2	2	2	2	2	6	3	3	3	3	3	3	3	3	0	0	0	0	0	0	0	0	0	0	0	2	1	3	0	0	0	1	5	5	5	5	5	5	#NULL!	4	4
2	22	3	2	4	3	3	1	2	1	5	6	6	4	6	3	3	3	3	2	2	3	3	1	0	0	0	0	0	0	0	0	0	0	2	0	1	1	0	0	0	5	6	2	#NULL!	#NULL!	3	#NULL!	4	4
2	32	8	4	4	1	1	1	3	1	1	4	1	4	6	3	4	4	4	4	4	4	3	0	0	0	0	0	0	0	0	0	0	0	2	0	3	0	0	1	1	4	6	6	3	6	3	#NULL!	4	5
2	30	8	1	4	2	1	1	1	2	3	1	3	1	6	3	3	3	3	3	2	3	3	0	0	0	0	0	0	0	0	0	0	0	1	0	3	0	0	0	1	6	5	4	6	4	6	#NULL!	4	4
1	33	5	1	4	3	1	1	1	1	1	1	4	4	6	4	4	4	4	3	3	3	3	1	0	0	0	0	0	0	0	0	0	0	2	1	2	0	0	0	1	6	6	6	6	3	3	#NULL!	5	5
2	34	3	3	4	2	3	1	1	1	1	6	1	1	6	4	3	3	3	3	3	3	3	0	0	0	0	0	0	0	0	0	0	0	1	0	1	1	0	0	0	6	6	6	#NULL!	6	6	#NULL!	5	4
2	34	6	3	4	3	1	1	2	3	2	1	1	3	6	4	4	4	4	3	2	4	2	1	0	0	0	0	0	0	1	0	0	0	1	0	2	1	0	0	1	5	4	5	6	6	4	#NULL!	5	5
1	19	8	1	2	1	4	1	1	1	1	6	1	3	6	3	3	3	3	3	2	2	2	1	1	0	0	0	0	0	0	0	0	0	2	1	3	0	1	1	0	6	6	6	#NULL!	6	4	#NULL!	4	4
1	24	8	1	1	1	4	1	1	2	3	2	2	3	6	4	4	4	3	3	3	3	3	1	0	0	0	0	0	0	0	0	0	0	1	1	3	0	1	1	0	6	5	4	5	5	4	#NULL!	5	5
1	20	8	1	2	2	4	1	2	1	1	6	1	3	6	3	3	3	3	2	2	3	2	0	0	0	0	0	0	0	0	0	0	0	2	1	3	0	1	0	0	5	6	6	#NULL!	6	4	#NULL!	4	4
1	18	4	1	2	2	4	1	1	1	1	6	1	4	6	3	3	3	3	2	2	3	2	1	0	1	0	0	0	0	0	1	0	0	2	1	2	0	1	0	0	6	6	6	#NULL!	6	3	#NULL!	4	4
1	33	3	2	4	2	1	1	1	1	1	6	2	2	6	3	2	2	3	3	3	3	3	0	0	0	0	0	0	0	0	0	0	0	2	1	1	1	0	0	1	6	6	6	#NULL!	5	5	#NULL!	4	2
2	28	3	2	4	3	3	1	3	1	2	6	6	2	6	3	3	3	3	3	2	3	3	0	0	0	0	0	0	0	0	0	0	0	2	0	1	1	0	0	0	4	6	5	#NULL!	#NULL!	5	#NULL!	4	4
1	23	8	1	2	1	1	1	3	1	2	1	3	4	6	3	3	4	2	3	1	3	2	0	0	1	0	0	0	0	0	0	0	0	2	1	3	0	1	1	1	4	6	5	6	4	3	#NULL!	4	4
2	29	4	3	2	1	1	1	2	1	1	2	1	3	6	3	3	4	3	3	3	3	2	1	0	0	0	0	0	0	0	1	0	0	2	0	2	1	1	1	1	5	6	6	5	6	4	#NULL!	4	4
2	28	4	2	4	3	1	1	1	1	1	1	1	3	6	3	3	3	3	3	3	3	3	0	0	0	0	0	0	0	0	0	0	0	2	0	2	1	0	0	1	6	6	6	6	6	4	#NULL!	4	4
1	35	7	2	4	2	1	1	1	1	1	1	2	2	4	4	3	3	3	2	2	3	2	1	0	0	0	0	0	0	0	1	0	0	1	1	3	1	0	0	1	6	6	6	6	5	5	3	5	4
1	21	8	1	2	2	4	1	1	3	1	6	1	2	6	4	3	3	3	2	3	3	3	0	0	0	0	0	0	0	0	0	0	0	1	1	3	0	1	0	0	6	4	6	#NULL!	6	5	#NULL!	5	4
2	21	7	1	2	3	4	1	1	1	1	6	1	2	6	3	3	4	3	3	3	3	2	1	0	0	0	0	0	0	0	0	0	0	2	0	3	0	1	0	0	6	6	6	#NULL!	6	5	#NULL!	4	4
1	21	6	1	4	1	4	1	1	1	1	6	2	3	6	3	3	4	3	2	3	3	3	0	0	0	0	0	0	0	0	0	0	0	2	1	2	0	0	1	0	6	6	6	#NULL!	5	4	#NULL!	4	4
2	28	4	2	2	1	2	1	1	2	1	3	1	3	1	4	4	4	4	2	2	2	2	1	0	0	0	0	0	0	0	0	0	0	1	0	2	1	1	1	1	6	5	6	4	6	4	6	5	5
1	30	8	2	4	1	1	1	1	2	2	1	2	3	1	2	2	3	2	2	2	2	2	1	1	1	0	0	0	0	0	1	0	1	2	1	3	1	0	1	1	6	5	5	6	5	4	6	2	2
2	32	7	6	4	1	2	1	1	1	1	2	3	3	6	3	3	3	3	3	3	3	3	0	0	0	0	0	0	0	0	0	0	0	2	0	3	1	0	1	1	6	6	6	5	4	4	#NULL!	4	4
2	19	5	6	2	1	3	1	1	1	2	3	2	4	6	4	3	3	3	3	3	3	3	1	0	0	0	0	0	0	0	0	0	0	2	0	2	1	1	1	0	6	6	5	4	5	3	#NULL!	5	4
2	29	9	1	4	1	4	1	2	2	2	4	2	1	6	3	2	3	2	2	2	2	2	1	0	0	0	0	0	0	0	0	0	0	2	0	3	0	0	1	0	5	5	5	3	5	6	#NULL!	4	2
2	22	9	1	2	1	4	1	1	1	1	1	1	1	6	4	3	3	3	3	3	3	3	0	0	0	0	0	0	0	0	0	0	0	2	0	3	0	1	1	0	6	6	6	6	6	6	#NULL!	5	4
1	19	8	1	2	3	4	1	1	1	1	1	1	2	6	4	3	3	3	3	2	2	2	0	0	0	0	0	0	0	0	0	0	0	2	1	3	0	1	0	0	6	6	6	6	6	5	#NULL!	5	4
1	24	8	1	2	1	1	1	1	1	1	1	4	4	4	4	4	4	4	3	2	3	3	0	0	0	0	0	1	0	1	0	0	0	2	1	3	0	1	1	1	6	6	6	6	3	3	3	5	5
2	32	3	2	1	1	3	1	1	3	1	2	6	3	6	4	3	3	3	3	3	3	3	0	0	0	0	0	0	0	0	0	0	0	1	0	1	1	1	1	0	6	4	6	5	#NULL!	4	#NULL!	5	4
1	21	8	1	2	1	4	1	1	2	1	6	5	4	3	4	3	3	3	3	3	3	3	0	0	0	0	0	0	0	0	0	0	0	2	1	3	0	1	1	0	6	5	6	#NULL!	2	3	4	5	4
1	24	5	1	1	2	2	1	2	3	3	2	2	2	3	4	4	4	3	3	3	3	3	0	0	0	0	0	0	0	0	0	0	0	2	1	2	0	1	0	1	5	4	4	5	5	5	4	5	5
2	18	8	1	2	1	4	1	2	2	1	6	6	4	6	3	3	3	3	2	3	3	2	0	0	0	0	0	0	0	0	0	0	0	2	0	3	0	1	1	0	5	5	6	#NULL!	#NULL!	3	#NULL!	4	4
1	28	6	1	4	1	2	1	2	2	2	2	2	2	2	4	4	4	4	4	4	4	4	0	0	0	0	0	0	0	0	0	0	0	1	1	2	0	0	1	1	5	5	5	5	5	5	5	5	5
2	34	3	2	4	1	1	1	1	1	1	1	1	1	5	2	1	2	2	2	1	2	1	0	1	0	0	0	0	0	0	0	0	0	1	0	1	1	0	1	1	6	6	6	6	6	6	2	2	1
2	34	5	2	4	1	3	1	2	6	1	6	2	2	6	3	3	4	-1	1	3	2	2	0	0	0	0	0	0	0	0	0	0	0	1	0	2	1	0	1	0	5	#NULL!	6	#NULL!	5	5	#NULL!	4	4
1	31	7	2	1	2	3	1	1	1	1	1	1	2	6	4	4	3	3	3	3	3	3	0	0	0	0	0	0	0	0	0	0	0	2	1	3	1	1	0	0	6	6	6	6	6	5	#NULL!	5	5
2	24	7	2	4	1	3	1	4	1	1	6	6	4	6	4	2	3	3	2	3	3	2	0	0	0	0	0	0	0	0	0	0	0	1	0	3	1	0	1	0	3	6	6	#NULL!	#NULL!	3	#NULL!	5	2
2	24	9	1	2	1	4	1	5	1	1	6	1	3	6	4	4	4	4	4	3	4	3	0	0	0	0	0	0	0	0	1	0	0	2	0	3	0	1	1	0	2	6	6	#NULL!	6	4	#NULL!	5	5
1	28	5	2	4	1	1	1	6	4	2	6	6	6	6	4	3	3	3	3	3	3	3	0	0	0	0	0	0	0	0	0	0	0	2	1	2	1	0	1	1	#NULL!	3	5	#NULL!	#NULL!	#NULL!	#NULL!	5	4
1	33	3	4	4	3	3	1	1	2	1	6	6	5	6	3	3	4	3	3	3	3	4	0	0	0	0	0	0	0	0	0	0	0	1	1	1	0	0	0	0	6	5	6	#NULL!	#NULL!	2	#NULL!	4	4
2	19	7	1	2	1	4	1	2	1	1	2	2	2	5	4	4	4	3	2	3	3	3	0	0	0	0	0	0	0	0	1	0	0	1	0	3	0	1	1	0	5	6	6	5	5	5	2	5	5
1	23	8	1	2	1	4	1	1	2	1	6	2	4	6	3	2	3	3	3	1	2	2	0	0	0	0	0	0	0	0	0	0	0	2	1	3	0	1	1	0	6	5	6	#NULL!	5	3	#NULL!	4	2
2	24	9	1	2	1	4	1	2	1	1	6	2	4	5	4	-1	3	2	2	2	2	3	1	0	0	0	0	0	0	0	1	0	0	2	0	3	0	1	1	0	5	6	6	#NULL!	5	3	2	5	3
2	35	3	2	4	1	3	1	6	1	3	6	6	4	5	-1	3	-1	3	3	-1	-1	-1	0	0	0	0	0	0	0	0	0	0	0	2	0	1	1	0	1	0	#NULL!	6	4	#NULL!	#NULL!	3	2	3	4
1	29	8	1	1	3	3	1	3	6	1	6	6	6	6	4	3	3	3	3	3	3	3	0	0	0	0	0	0	0	0	0	0	0	2	1	3	0	1	0	0	4	#NULL!	6	#NULL!	#NULL!	#NULL!	#NULL!	5	4
2	19	5	1	4	3	4	1	4	1	2	2	3	4	6	4	4	4	3	3	3	3	3	1	0	0	0	0	0	0	0	0	0	0	2	0	2	0	0	0	0	3	6	5	5	4	3	#NULL!	5	5
1	19	8	1	2	1	4	1	1	1	1	1	1	4	6	3	3	3	3	3	2	3	3	1	0	1	0	0	0	0	0	0	0	1	2	1	3	0	1	1	0	6	6	6	6	6	3	#NULL!	4	4
2	29	8	2	4	1	2	1	1	1	1	6	2	2	2	3	3	3	3	3	2	3	2	1	0	0	0	0	0	0	0	0	0	0	2	0	3	1	0	1	1	6	6	6	#NULL!	5	5	5	4	4
2	24	3	2	4	3	1	1	3	1	1	6	1	2	6	3	3	3	3	3	3	2	2	0	0	0	0	0	0	0	0	0	0	0	2	0	1	1	0	0	1	4	6	6	#NULL!	6	5	#NULL!	4	4
2	28	3	2	4	1	3	1	6	6	3	6	6	5	6	2	3	3	3	3	3	3	3	0	0	0	0	0	0	0	0	0	0	0	1	0	1	1	0	1	0	#NULL!	#NULL!	4	#NULL!	#NULL!	2	#NULL!	2	4
2	31	7	2	1	1	2	1	1	2	2	1	1	3	4	3	3	2	2	2	2	3	3	0	1	0	0	0	0	0	0	1	0	0	2	0	3	1	1	1	1	6	5	5	6	6	4	3	4	4
2	26	5	2	4	1	3	1	5	4	1	6	3	4	6	4	3	3	3	2	2	2	3	0	0	0	0	0	0	0	1	0	0	0	1	0	2	1	0	1	0	2	3	6	#NULL!	4	3	#NULL!	5	4
2	31	8	2	4	3	1	1	4	4	4	4	4	4	6	4	3	3	3	3	3	3	3	0	0	0	0	0	0	0	0	0	0	0	2	0	3	1	0	0	1	3	3	3	3	3	3	#NULL!	5	4
2	23	8	1	2	1	3	1	1	1	1	1	1	1	1	4	4	4	3	3	3	3	3	1	1	0	0	0	0	0	0	0	0	0	2	0	3	0	1	1	0	6	6	6	6	6	6	6	5	5
2	22	7	1	2	1	3	1	4	1	1	6	1	2	6	3	3	3	3	3	3	4	3	0	0	0	0	0	0	0	0	0	0	0	2	0	3	0	1	1	0	3	6	6	#NULL!	6	5	#NULL!	4	4
2	33	3	2	4	1	3	1	6	5	5	6	1	5	6	2	1	3	1	2	4	1	2	1	0	1	0	1	0	0	0	0	0	0	2	0	1	1	0	1	0	#NULL!	2	2	#NULL!	6	2	#NULL!	2	1
2	34	3	2	4	1	2	1	4	1	1	6	3	3	6	-1	-1	-1	2	-1	2	2	1	0	0	0	0	0	0	0	0	0	0	0	2	0	1	1	0	1	1	3	6	6	#NULL!	4	4	#NULL!	3	3
2	23	8	1	2	1	2	1	3	1	1	1	4	2	6	4	3	3	3	2	2	3	2	0	0	0	0	0	0	0	0	0	0	0	2	0	3	0	1	1	1	4	6	6	6	3	5	#NULL!	5	4
2	34	7	2	1	3	1	1	1	1	1	6	6	1	3	4	4	4	3	2	3	3	2	0	0	0	0	0	0	0	0	0	0	0	1	0	3	1	1	0	1	6	6	6	#NULL!	#NULL!	6	4	5	5
1	19	4	1	2	1	4	1	2	2	1	6	1	2	6	3	3	3	3	2	3	3	2	0	0	0	0	0	0	0	0	0	0	0	2	1	2	0	1	1	0	5	5	6	#NULL!	6	5	#NULL!	4	4
1	25	3	2	4	1	2	1	1	5	1	1	1	5	5	2	3	3	3	3	2	2	2	1	0	0	0	1	0	0	0	0	0	0	2	1	1	1	0	1	1	6	2	6	6	6	2	2	2	4
1	31	2	1	4	1	1	1	3	6	2	6	4	6	6	3	3	2	3	3	3	3	3	0	0	1	0	0	0	0	1	0	0	0	1	1	1	0	0	1	1	4	#NULL!	5	#NULL!	3	#NULL!	#NULL!	4	4
2	32	7	2	4	1	1	1	4	4	2	1	4	2	6	3	3	3	3	3	3	3	3	0	0	0	0	0	0	0	0	0	0	0	2	0	3	1	0	1	1	3	3	5	6	3	5	#NULL!	4	4
1	19	8	1	2	1	4	1	1	1	1	6	3	2	5	4	3	3	3	2	3	3	2	1	0	1	0	1	0	0	0	0	0	0	2	1	3	0	1	1	0	6	6	6	#NULL!	4	5	2	5	4
1	23	8	1	2	1	4	1	2	1	2	6	2	3	6	4	4	4	4	4	4	4	4	1	0	0	0	0	0	0	0	0	0	0	2	1	3	0	1	1	0	5	6	5	#NULL!	5	4	#NULL!	5	5
1	31	3	2	4	3	1	1	1	1	1	1	5	4	6	4	4	4	4	1	1	3	3	0	0	0	0	0	0	0	0	0	0	0	1	1	1	1	0	0	1	6	6	6	6	2	3	#NULL!	5	5
1	21	7	1	2	3	4	1	1	1	1	1	1	1	5	3	4	4	4	1	1	3	3	1	0	0	0	0	0	0	0	1	0	0	1	1	3	0	1	0	0	6	6	6	6	6	6	2	4	5
2	21	8	1	2	1	4	1	1	1	1	6	2	3	6	3	3	3	3	2	2	2	2	1	0	0	0	0	0	0	0	0	0	0	2	0	3	0	1	1	0	6	6	6	#NULL!	5	4	#NULL!	4	4
2	19	7	1	2	1	4	1	1	1	2	6	1	4	6	4	4	-1	4	3	-1	3	3	1	0	0	0	0	0	0	0	0	0	0	1	0	3	0	1	1	0	6	6	5	#NULL!	6	3	#NULL!	5	5
1	22	8	1	2	3	4	1	1	1	1	6	2	3	1	3	3	3	3	2	2	3	3	1	1	0	0	0	0	0	0	0	0	0	2	1	3	0	1	0	0	6	6	6	#NULL!	5	4	6	4	4
2	35	8	2	1	2	1	1	1	2	1	1	3	4	6	3	3	3	3	3	3	3	3	0	0	0	0	0	0	0	1	1	0	0	1	0	3	1	1	0	1	6	5	6	6	4	3	#NULL!	4	4
1	23	8	1	2	1	1	1	5	1	1	1	6	5	4	4	2	3	4	2	2	3	3	1	0	0	0	0	0	0	0	0	0	0	2	1	3	0	1	1	1	2	6	6	6	#NULL!	2	3	5	2
1	23	3	1	2	1	2	1	4	5	5	6	5	4	6	-1	-1	-1	3	3	3	3	3	0	0	1	0	0	0	0	0	1	0	1	2	1	1	0	1	1	1	3	2	2	#NULL!	2	3	#NULL!	3	3
2	35	7	2	4	3	3	1	4	2	2	1	4	2	6	3	3	3	3	2	2	3	2	0	0	0	0	0	0	0	0	0	0	0	2	0	3	1	0	0	0	3	5	5	6	3	5	#NULL!	4	4
1	35	8	2	1	2	1	1	1	1	1	1	1	3	4	4	3	3	3	3	2	3	3	0	0	0	0	0	0	0	1	1	0	0	2	1	3	1	1	0	1	6	6	6	6	6	4	3	5	4
1	24	8	1	2	3	4	1	2	2	2	2	2	2	5	4	3	4	3	3	3	3	4	0	0	0	0	0	0	0	0	0	0	0	2	1	3	0	1	0	0	5	5	5	5	5	5	2	5	4
1	29	7	2	1	1	1	1	1	2	2	1	2	3	3	4	4	4	4	4	4	4	4	0	0	0	0	0	0	0	1	1	0	0	1	1	3	1	1	1	1	6	5	5	6	5	4	4	5	5
1	19	7	1	4	3	4	1	3	1	1	3	1	4	3	3	3	3	3	3	3	3	3	0	0	0	0	0	0	0	0	0	0	0	1	1	3	0	0	0	0	4	6	6	4	6	3	4	4	4
1	32	8	1	4	2	1	1	1	5	1	1	2	1	6	4	3	3	3	3	3	3	3	0	0	0	0	0	0	0	0	1	0	0	2	1	3	0	0	0	1	6	2	6	6	5	6	#NULL!	5	4
1	28	8	1	1	3	1	1	1	1	1	1	1	2	3	4	3	3	4	3	3	3	3	1	0	0	1	1	0	0	0	0	0	0	2	1	3	0	1	0	1	6	6	6	6	6	5	4	5	4
2	20	7	1	3	1	4	1	2	1	1	6	2	2	6	4	2	3	3	3	3	3	3	0	0	0	0	0	0	0	0	0	0	0	2	0	3	0	1	1	0	5	6	6	#NULL!	5	5	#NULL!	5	2
2	21	8	1	2	1	4	1	5	1	1	6	1	2	6	3	3	4	3	2	3	2	3	1	0	0	0	0	0	0	0	0	0	0	2	0	3	0	1	1	0	2	6	6	#NULL!	6	5	#NULL!	4	4
2	30	3	2	4	1	3	1	6	1	1	6	2	3	6	3	3	3	3	3	3	3	3	0	0	0	0	0	0	0	0	0	0	0	2	0	1	1	0	1	0	#NULL!	6	6	#NULL!	5	4	#NULL!	4	4
2	25	9	1	2	1	4	1	4	1	1	4	2	2	6	4	3	4	4	3	3	3	3	0	0	0	0	0	0	0	0	0	0	0	2	0	3	0	1	1	0	3	6	6	3	5	5	#NULL!	5	4
2	25	8	1	2	1	3	1	3	1	1	1	1	4	6	4	3	3	3	2	3	3	3	1	0	0	0	0	0	0	0	0	0	0	2	0	3	0	1	1	0	4	6	6	6	6	3	#NULL!	5	4
1	23	8	1	2	1	4	1	2	1	1	6	2	4	6	3	3	3	3	3	3	3	3	1	0	0	0	0	0	0	0	0	0	0	2	1	3	0	1	1	0	5	6	6	#NULL!	5	3	#NULL!	4	4
2	28	5	2	4	1	3	1	1	1	1	1	2	2	6	3	-1	3	3	3	3	3	3	0	0	0	0	0	0	0	0	0	0	0	2	0	2	1	0	1	0	6	6	6	6	5	5	#NULL!	4	3
2	24	7	1	2	1	2	1	3	1	1	6	2	2	6	4	3	3	3	3	2	3	3	1	0	0	0	0	0	0	0	0	0	0	1	0	3	0	1	1	1	4	6	6	#NULL!	5	5	#NULL!	5	4
1	32	8	2	4	2	1	1	4	4	1	1	4	4	1	1	1	1	1	1	1	4	1	0	0	0	0	0	0	0	0	0	0	0	2	1	3	1	0	0	1	3	3	6	6	3	3	6	1	1
1	19	7	1	4	1	4	1	1	1	1	6	1	3	6	4	4	3	3	4	3	2	2	0	0	0	0	0	0	0	0	0	0	0	2	1	3	0	0	1	0	6	6	6	#NULL!	6	4	#NULL!	5	5
1	23	8	1	2	2	3	1	1	1	1	2	1	2	5	4	2	3	2	2	3	3	2	0	0	0	0	0	0	0	0	1	0	1	2	1	3	0	1	0	0	6	6	6	5	6	5	2	5	2
2	33	3	2	4	1	2	1	6	5	4	6	4	2	6	4	3	3	4	3	4	4	4	0	0	0	0	0	0	0	0	0	0	0	1	0	1	1	0	1	1	#NULL!	2	3	#NULL!	3	5	#NULL!	5	4
2	20	8	1	1	2	4	1	1	1	1	3	1	2	6	3	3	3	3	3	3	3	3	1	0	0	0	0	0	0	0	0	0	0	2	0	3	0	1	0	0	6	6	6	4	6	5	#NULL!	4	4
1	29	5	2	4	1	1	1	6	1	4	6	6	6	6	1	1	2	3	2	1	2	2	0	0	0	0	0	0	0	1	0	0	0	2	1	2	1	0	1	1	#NULL!	6	3	#NULL!	#NULL!	#NULL!	#NULL!	1	1
1	19	4	1	4	1	4	1	2	1	5	6	1	4	6	4	4	4	4	3	3	4	3	0	0	0	0	0	0	0	0	0	0	0	2	1	2	0	0	1	0	5	6	2	#NULL!	6	3	#NULL!	5	5
2	28	3	2	4	3	1	1	5	1	1	1	2	3	6	3	3	3	3	3	2	3	3	0	0	0	0	0	0	0	0	0	0	0	1	0	1	1	0	0	1	2	6	6	6	5	4	#NULL!	4	4
2	18	4	1	2	1	4	1	3	1	2	6	2	3	6	4	3	4	3	3	3	3	2	1	0	0	0	0	0	0	0	0	0	0	2	0	2	0	1	1	0	4	6	5	#NULL!	5	4	#NULL!	5	4
2	34	5	2	4	2	3	1	1	1	4	6	2	4	6	1	3	3	2	3	2	3	2	1	0	0	0	0	0	0	0	0	0	0	2	0	2	1	0	0	0	6	6	3	#NULL!	5	3	#NULL!	1	4
1	18	7	1	4	1	4	1	2	1	1	6	6	4	6	4	4	4	4	3	3	3	3	0	0	0	0	0	0	0	0	0	0	0	2	1	3	0	0	1	0	5	6	6	#NULL!	#NULL!	3	#NULL!	5	5
2	28	3	2	4	3	3	1	1	1	1	6	1	1	6	3	3	4	4	3	3	3	3	0	0	0	0	0	0	0	0	0	0	0	1	0	1	1	0	0	0	6	6	6	#NULL!	6	6	#NULL!	4	4
2	19	4	1	2	1	4	1	1	1	1	6	2	3	6	4	4	4	4	3	3	3	3	1	0	0	0	0	0	0	0	0	0	0	2	0	2	0	1	1	0	6	6	6	#NULL!	5	4	#NULL!	5	5
2	30	4	2	4	1	3	1	3	2	2	6	6	4	6	3	3	3	3	3	2	2	2	0	0	0	0	0	0	0	0	0	0	0	2	0	2	1	0	1	0	4	5	5	#NULL!	#NULL!	3	#NULL!	4	4
1	28	3	2	4	1	1	1	3	1	3	1	1	1	1	1	2	3	3	3	1	3	3	0	0	0	0	0	0	0	0	0	0	0	2	1	1	1	0	1	1	4	6	4	6	6	6	6	1	2
1	30	4	3	4	1	2	1	2	1	3	6	6	2	6	4	2	1	3	4	3	3	3	0	0	0	0	0	0	0	0	0	0	0	2	1	2	1	0	1	1	5	6	4	#NULL!	#NULL!	5	#NULL!	5	2
1	22	6	1	4	3	1	1	5	2	1	1	5	4	6	4	4	4	4	4	4	4	4	0	0	0	0	0	0	0	0	0	0	0	2	1	2	0	0	0	1	2	5	6	6	2	3	#NULL!	5	5
2	19	8	1	2	1	4	1	2	1	1	3	3	2	6	4	4	4	4	2	2	3	3	1	0	0	0	0	0	0	0	0	0	0	2	0	3	0	1	1	0	5	6	6	4	4	5	#NULL!	5	5
1	21	8	1	2	3	4	1	1	1	1	6	1	2	1	4	4	4	4	2	2	3	2	1	0	0	0	0	0	0	1	0	0	0	2	1	3	0	1	0	0	6	6	6	#NULL!	6	5	6	5	5
1	31	7	1	4	2	1	1	6	1	1	6	6	4	6	4	3	2	3	3	1	4	3	0	0	0	0	0	0	0	0	0	0	0	2	1	3	0	0	0	1	#NULL!	6	6	#NULL!	#NULL!	3	#NULL!	5	4
1	20	6	1	4	1	2	1	1	1	1	1	1	4	6	4	3	3	3	3	3	3	3	1	0	0	0	1	0	0	0	0	0	0	1	1	2	0	0	1	1	6	6	6	6	6	3	#NULL!	5	4
1	23	8	1	2	3	3	1	2	1	1	4	1	2	4	3	3	2	2	2	3	2	2	1	0	1	0	1	0	0	0	1	0	0	2	1	3	0	1	0	0	5	6	6	3	6	5	3	4	4
1	18	5	1	4	1	4	1	2	3	1	6	1	3	6	3	3	3	3	3	3	3	3	0	0	0	0	0	0	0	0	0	0	0	2	1	2	0	0	1	0	5	4	6	#NULL!	6	4	#NULL!	4	4
2	22	7	1	2	3	2	1	2	1	1	2	6	2	6	4	4	4	4	1	1	3	3	1	0	0	0	0	0	0	0	0	0	0	2	0	3	0	1	0	1	5	6	6	5	#NULL!	5	#NULL!	5	5
2	35	3	2	4	1	1	1	6	2	6	6	6	4	6	1	-1	3	4	-1	3	1	2	0	0	0	0	0	0	0	0	0	0	0	2	0	1	1	0	1	1	#NULL!	5	#NULL!	#NULL!	#NULL!	3	#NULL!	1	3
2	32	7	2	4	2	1	1	1	1	1	1	1	1	4	3	3	3	3	3	3	3	3	0	0	0	0	0	0	0	0	0	0	0	2	0	3	1	0	0	1	6	6	6	6	6	6	3	4	4
1	29	3	2	4	1	3	1	6	1	3	6	6	5	6	4	1	3	3	4	3	1	3	0	0	0	0	0	0	0	0	0	0	0	2	1	1	1	0	1	0	#NULL!	6	4	#NULL!	#NULL!	2	#NULL!	5	1
2	31	3	2	4	1	3	1	3	3	3	3	2	3	6	2	3	2	3	3	2	3	2	0	0	0	0	0	0	0	0	0	1	0	1	0	1	1	0	1	0	4	4	4	4	5	4	#NULL!	2	4
2	32	2	2	4	1	3	1	3	5	1	6	6	4	6	-1	-1	-1	3	3	3	-1	4	0	0	0	0	0	0	0	0	1	0	0	2	0	1	1	0	1	0	4	2	6	#NULL!	#NULL!	3	#NULL!	3	3
2	34	7	4	4	2	1	1	1	1	1	1	6	1	6	4	2	2	3	2	2	3	3	0	1	0	0	0	1	0	0	0	0	0	2	0	3	0	0	0	1	6	6	6	6	#NULL!	6	#NULL!	5	2
2	28	3	2	4	1	3	1	5	2	1	6	5	2	6	4	3	4	3	2	2	2	3	0	0	0	0	0	0	0	0	0	0	0	2	0	1	1	0	1	0	2	5	6	#NULL!	2	5	#NULL!	5	4
1	21	7	1	2	1	3	1	4	1	1	6	3	3	6	4	3	3	3	3	3	3	3	0	0	0	0	0	0	0	0	0	0	0	2	1	3	0	1	1	0	3	6	6	#NULL!	4	4	#NULL!	5	4
2	32	4	2	4	1	3	1	5	1	1	6	5	4	6	3	3	4	4	3	3	3	3	0	0	0	0	0	0	0	0	0	0	0	2	0	2	1	0	1	0	2	6	6	#NULL!	2	3	#NULL!	4	4
2	34	5	2	4	1	3	1	2	3	1	6	1	5	4	3	4	3	3	3	2	2	3	0	0	0	0	0	0	0	0	0	0	0	1	0	2	1	0	1	0	5	4	6	#NULL!	6	2	3	4	5
2	20	8	1	2	3	4	1	3	1	1	6	2	1	4	4	4	4	3	2	3	3	3	0	0	0	0	0	0	0	0	0	0	0	2	0	3	0	1	0	0	4	6	6	#NULL!	5	6	3	5	5
2	31	3	2	4	1	3	1	5	1	1	6	6	5	6	2	2	2	1	2	2	2	1	0	0	0	0	0	0	0	0	0	0	0	2	0	1	1	0	1	0	2	6	6	#NULL!	#NULL!	2	#NULL!	2	2
1	26	8	1	4	1	2	1	2	2	2	1	3	2	3	4	4	4	4	4	4	4	4	0	1	0	0	0	0	0	0	0	0	0	2	1	3	0	0	1	1	5	5	5	6	4	5	4	5	5
2	31	8	2	4	1	1	1	1	1	1	1	1	2	2	4	4	4	4	4	4	4	4	1	0	0	0	0	0	0	0	0	0	0	1	0	3	1	0	1	1	6	6	6	6	6	5	5	5	5
1	33	2	2	4	1	1	1	1	1	1	6	6	5	6	-1	2	1	3	3	2	-1	3	0	0	0	0	0	0	0	0	0	0	0	1	1	1	1	0	1	1	6	6	6	#NULL!	#NULL!	2	#NULL!	3	2
2	34	2	4	4	1	3	1	6	1	1	6	6	4	6	-1	1	3	3	-1	2	3	2	0	0	0	0	0	0	0	0	0	0	0	1	0	1	0	0	1	0	#NULL!	6	6	#NULL!	#NULL!	3	#NULL!	3	1
1	20	8	1	2	1	4	1	6	1	1	6	2	4	6	4	4	4	2	2	3	3	3	1	0	0	0	1	0	0	0	0	0	0	2	1	3	0	1	1	0	#NULL!	6	6	#NULL!	5	3	#NULL!	5	5
1	19	4	1	2	3	4	1	1	1	1	6	1	4	6	3	3	3	3	3	3	3	3	0	0	0	0	0	0	0	0	0	0	0	1	1	2	0	1	0	0	6	6	6	#NULL!	6	3	#NULL!	4	4
1	26	9	1	4	3	2	1	1	1	1	1	2	4	4	3	3	3	3	2	2	3	2	1	1	1	0	0	0	0	0	1	0	1	2	1	3	0	0	0	1	6	6	6	6	5	3	3	4	4
1	19	4	1	4	1	4	1	5	3	3	6	6	1	6	4	3	3	3	3	3	3	3	0	0	0	0	0	0	0	0	0	0	0	2	1	2	0	0	1	0	2	4	4	#NULL!	#NULL!	6	#NULL!	5	4
1	29	3	1	4	1	3	1	6	1	1	6	6	2	5	3	2	3	3	3	3	3	3	0	0	0	0	0	0	0	0	0	0	0	2	1	1	0	0	1	0	#NULL!	6	6	#NULL!	#NULL!	5	2	4	2
1	24	4	1	4	1	1	1	2	1	1	1	1	1	6	3	3	-1	3	2	1	3	3	0	0	0	0	0	0	0	0	0	0	0	2	1	2	0	0	1	1	5	6	6	6	6	6	#NULL!	4	4
2	24	2	2	4	1	3	1	2	1	1	6	6	4	6	3	3	3	3	3	3	3	3	0	0	0	0	0	0	0	0	0	0	0	2	0	1	1	0	1	0	5	6	6	#NULL!	#NULL!	3	#NULL!	4	4
2	18	4	1	2	2	4	1	2	1	1	5	2	3	6	4	4	4	3	2	2	4	4	1	0	0	0	0	0	0	0	0	0	0	2	0	2	0	1	0	0	5	6	6	2	5	4	#NULL!	5	5
2	31	7	1	2	1	1	1	4	4	2	3	4	2	6	4	3	3	3	3	3	3	3	0	0	0	0	0	0	0	0	0	0	0	2	0	3	0	1	1	1	3	3	5	4	3	5	#NULL!	5	4
2	31	5	2	4	3	3	1	5	3	1	6	6	5	6	3	3	3	3	2	2	3	3	0	0	0	0	0	0	0	0	0	0	0	2	0	2	1	0	0	0	2	4	6	#NULL!	#NULL!	2	#NULL!	4	4
2	24	7	2	2	1	2	1	1	1	1	6	2	4	6	3	3	3	3	3	3	3	3	0	0	0	0	0	0	0	0	0	0	0	2	0	3	1	1	1	1	6	6	6	#NULL!	5	3	#NULL!	4	4
2	30	3	2	4	1	3	1	5	1	1	6	3	4	6	3	3	3	3	2	3	2	3	1	0	0	0	0	0	0	0	0	0	0	2	0	1	1	0	1	0	2	6	6	#NULL!	4	3	#NULL!	4	4
1	28	7	2	4	1	1	1	1	1	1	6	3	2	5	4	3	3	3	3	2	2	2	1	0	0	0	0	0	0	0	0	0	0	2	1	3	1	0	1	1	6	6	6	#NULL!	4	5	2	5	4
1	24	8	1	4	2	1	1	1	1	1	1	4	3	6	3	3	3	3	2	2	3	3	0	0	0	0	0	0	0	0	0	0	0	2	1	3	0	0	0	1	6	6	6	6	3	4	#NULL!	4	4
1	19	7	1	2	2	4	1	2	1	1	3	2	4	6	4	4	4	4	2	2	4	3	1	0	0	1	0	0	0	0	0	0	0	2	1	3	0	1	0	0	5	6	6	4	5	3	#NULL!	5	5
1	30	8	1	2	2	1	1	5	4	1	5	6	5	6	3	2	3	3	2	2	3	2	1	0	0	0	0	0	0	0	0	0	0	2	1	3	0	1	0	1	2	3	6	2	#NULL!	2	#NULL!	4	2
1	29	7	1	4	3	1	1	2	1	2	4	5	1	6	3	3	3	3	3	2	3	3	1	0	0	0	0	0	0	0	0	0	0	2	1	3	0	0	0	1	5	6	5	3	2	6	#NULL!	4	4
1	20	5	1	4	2	1	1	1	2	1	1	2	3	6	3	3	3	3	3	3	3	3	0	0	0	0	0	0	0	0	0	0	0	2	1	2	0	0	0	1	6	5	6	6	5	4	#NULL!	4	4
1	25	8	1	2	2	1	1	2	1	1	1	4	3	6	3	2	3	3	2	3	3	3	1	0	0	0	0	0	0	0	0	0	0	2	1	3	0	1	0	1	5	6	6	6	3	4	#NULL!	4	2
2	28	7	2	4	2	1	1	1	1	1	6	2	1	3	4	3	3	3	2	2	3	2	0	0	0	0	0	0	0	0	0	0	0	2	0	3	1	0	0	1	6	6	6	#NULL!	5	6	4	5	4
1	20	8	1	2	3	4	1	6	3	1	6	2	3	6	3	3	3	3	3	3	3	3	0	0	0	0	0	0	0	0	0	0	0	2	1	3	0	1	0	0	#NULL!	4	6	#NULL!	5	4	#NULL!	4	4
2	31	3	2	4	1	3	1	3	1	3	3	3	1	3	4	1	1	3	1	3	2	2	0	0	0	0	0	0	0	0	0	0	0	2	0	1	1	0	1	0	4	6	4	4	4	6	4	5	1
1	28	5	2	4	1	1	1	1	3	1	1	3	2	3	3	3	3	3	3	3	3	3	1	0	0	0	0	0	0	0	0	0	0	2	1	2	1	0	1	1	6	4	6	6	4	5	4	4	4
1	27	5	1	4	1	1	1	3	2	1	1	3	4	6	3	3	3	3	2	3	2	2	0	0	0	0	0	0	0	0	0	0	0	1	1	2	0	0	1	1	4	5	6	6	4	3	#NULL!	4	4
1	19	8	1	2	2	4	1	1	1	1	3	2	3	6	3	3	3	2	1	2	2	3	1	1	0	0	0	0	0	0	0	0	0	2	1	3	0	1	0	0	6	6	6	4	5	4	#NULL!	4	4
1	32	7	2	1	1	1	1	3	3	1	1	4	4	6	3	3	3	3	3	3	3	3	0	0	0	0	0	0	0	0	0	0	0	2	1	3	1	1	1	1	4	4	6	6	3	3	#NULL!	4	4
2	19	8	1	2	1	4	1	2	2	2	2	2	2	2	3	3	3	3	3	3	3	3	0	0	0	0	0	0	0	0	0	0	0	2	0	3	0	1	1	0	5	5	5	5	5	5	5	4	4
1	32	8	2	1	1	1	1	1	1	1	1	2	3	4	4	4	3	3	3	2	3	3	1	0	0	0	0	0	0	1	0	0	0	2	1	3	1	1	1	1	6	6	6	6	5	4	3	5	5
2	31	8	2	1	1	2	1	1	1	1	1	2	4	6	3	3	3	3	2	2	3	2	0	0	0	0	0	0	0	0	0	0	0	1	0	3	1	1	1	1	6	6	6	6	5	3	#NULL!	4	4
1	33	5	3	4	1	1	1	1	1	1	1	5	5	6	3	3	3	3	3	3	3	3	0	0	0	0	0	0	0	0	0	0	0	1	1	2	1	0	1	1	6	6	6	6	2	2	#NULL!	4	4
2	26	8	1	4	1	1	1	2	1	1	1	3	1	5	3	3	3	3	2	2	3	2	0	0	0	0	0	0	0	0	0	0	0	2	0	3	0	0	1	1	5	6	6	6	4	6	2	4	4
1	21	8	1	1	1	4	1	3	1	1	6	4	4	6	4	3	3	3	3	3	3	3	0	0	0	0	0	0	0	0	0	0	0	2	1	3	0	1	1	0	4	6	6	#NULL!	3	3	#NULL!	5	4
2	34	8	2	4	1	1	1	2	1	1	1	2	2	6	4	3	3	3	3	3	3	3	0	0	0	0	0	0	0	1	0	0	0	2	0	3	1	0	1	1	5	6	6	6	5	5	#NULL!	5	4
2	29	7	2	4	3	3	1	4	2	2	6	6	3	6	3	3	3	3	3	3	3	3	1	0	0	0	0	0	0	0	0	0	0	2	0	3	1	0	0	0	3	5	5	#NULL!	#NULL!	4	#NULL!	4	4
1	19	4	1	4	1	4	1	2	2	2	6	3	3	6	3	3	3	3	3	3	3	3	1	0	0	0	0	0	0	0	0	0	0	2	1	2	0	0	1	0	5	5	5	#NULL!	4	4	#NULL!	4	4
2	34	5	2	4	1	3	1	3	1	1	6	3	2	6	3	3	3	3	2	2	-1	2	0	0	0	0	0	0	0	0	1	0	0	1	0	2	1	0	1	0	4	6	6	#NULL!	4	5	#NULL!	4	4
1	18	4	1	4	1	4	1	2	2	2	6	2	2	6	4	4	3	3	3	3	3	3	1	0	0	0	0	0	0	0	0	0	0	2	1	2	0	0	1	0	5	5	5	#NULL!	5	5	#NULL!	5	5
1	31	8	1	4	2	2	1	6	2	2	3	1	5	6	2	1	1	1	2	1	1	1	1	0	1	0	1	0	0	0	0	0	0	2	1	3	0	0	0	1	#NULL!	5	5	4	6	2	#NULL!	2	1
2	23	8	1	4	2	3	1	3	1	2	3	3	1	6	2	2	3	3	2	3	3	3	0	0	0	0	0	0	0	0	0	0	0	2	0	3	0	0	0	0	4	6	5	4	4	6	#NULL!	2	2
1	22	8	1	4	3	1	1	2	1	1	2	1	3	4	3	3	3	3	1	1	3	2	1	1	0	0	0	0	0	0	0	0	1	2	1	3	0	0	0	1	5	6	6	5	6	4	3	4	4
1	29	7	2	4	2	1	1	1	3	1	1	2	3	6	2	1	1	2	1	3	2	3	0	0	0	0	0	0	0	0	0	0	0	2	1	3	1	0	0	1	6	4	6	6	5	4	#NULL!	2	1
2	29	7	2	4	3	3	1	2	4	1	6	1	2	6	4	2	3	3	2	2	3	2	1	0	0	0	0	0	0	0	0	0	0	2	0	3	1	0	0	0	5	3	6	#NULL!	6	5	#NULL!	5	2
2	24	3	1	4	1	3	1	1	3	2	6	6	4	6	3	3	4	3	3	3	3	2	1	0	0	0	1	0	0	0	0	0	0	2	0	1	0	0	1	0	6	4	5	#NULL!	#NULL!	3	#NULL!	4	4
1	24	3	1	4	1	3	1	6	1	1	6	6	4	6	3	1	1	1	3	2	3	1	0	0	0	0	0	0	0	0	0	0	0	2	1	1	0	0	1	0	#NULL!	6	6	#NULL!	#NULL!	3	#NULL!	4	1
2	32	4	2	4	1	3	1	3	1	2	6	2	2	6	4	3	4	3	3	3	3	4	1	0	0	0	0	0	0	0	0	0	0	1	0	2	1	0	1	0	4	6	5	#NULL!	5	5	#NULL!	5	4
1	26	3	1	4	2	1	1	3	1	1	2	5	4	6	3	3	3	2	3	2	3	2	0	0	0	0	0	0	0	0	0	0	0	2	1	1	0	0	0	1	4	6	6	5	2	3	#NULL!	4	4
1	18	4	1	4	1	4	1	2	1	1	6	2	4	6	3	3	3	3	3	3	3	3	1	0	0	0	0	0	0	0	0	0	0	2	1	2	0	0	1	0	5	6	6	#NULL!	5	3	#NULL!	4	4
2	28	4	2	4	3	2	1	3	1	1	6	2	3	6	3	3	3	3	3	3	3	3	0	0	0	0	0	0	0	0	0	0	0	2	0	2	1	0	0	1	4	6	6	#NULL!	5	4	#NULL!	4	4
1	23	3	1	4	1	3	1	3	2	2	2	5	3	6	1	3	3	3	3	3	2	2	1	0	0	0	0	0	0	0	0	0	0	2	1	1	0	0	1	0	4	5	5	5	2	4	#NULL!	1	4
2	33	4	2	4	1	1	1	4	2	2	1	1	2	6	2	1	2	1	3	2	2	4	0	0	1	0	0	0	0	0	0	0	0	2	0	2	1	0	1	1	3	5	5	6	6	5	#NULL!	2	1
2	27	3	2	4	1	3	1	6	3	3	6	6	2	6	-1	2	2	-1	3	2	3	2	0	0	0	0	0	0	0	0	0	0	0	2	0	1	1	0	1	0	#NULL!	4	4	#NULL!	#NULL!	5	#NULL!	3	2
1	22	6	1	1	3	2	1	1	1	1	1	1	1	1	3	3	4	3	3	3	3	3	1	0	1	0	0	0	0	0	0	0	0	2	1	2	0	1	0	1	6	6	6	6	6	6	6	4	4
1	30	8	1	4	3	1	1	1	1	1	1	1	2	2	4	4	4	4	4	4	4	4	0	0	0	0	0	0	0	0	0	0	0	1	1	3	0	0	0	1	6	6	6	6	6	5	5	5	5
2	33	4	2	1	1	3	1	4	4	1	6	4	3	6	3	3	3	2	2	2	3	2	0	0	0	0	0	0	0	0	0	0	0	2	0	2	1	1	1	0	3	3	6	#NULL!	3	4	#NULL!	4	4
1	32	3	1	4	1	3	1	2	3	2	6	6	5	6	3	3	3	3	3	3	3	3	0	0	0	0	0	0	0	0	0	0	0	1	1	1	0	0	1	0	5	4	5	#NULL!	#NULL!	2	#NULL!	4	4
1	31	7	1	4	2	1	1	3	1	1	1	1	3	6	4	4	4	4	3	2	3	3	0	0	0	0	0	0	0	0	0	0	0	1	1	3	0	0	0	1	4	6	6	6	6	4	#NULL!	5	5
2	23	8	1	2	1	3	1	1	1	1	6	1	4	6	4	4	4	3	3	3	3	2	1	1	1	0	0	0	0	0	0	0	0	2	0	3	0	1	1	0	6	6	6	#NULL!	6	3	#NULL!	5	5
1	25	7	1	2	1	1	1	1	2	1	1	2	2	6	3	3	4	4	-1	3	-1	-1	0	0	0	0	0	0	0	0	0	0	0	2	1	3	0	1	1	1	6	5	6	6	5	5	#NULL!	4	4
2	20	8	1	2	1	4	1	2	1	1	6	2	4	6	3	3	3	3	3	3	3	3	1	0	0	0	0	0	0	0	0	0	0	2	0	3	0	1	1	0	5	6	6	#NULL!	5	3	#NULL!	4	4
2	24	8	1	2	2	4	1	2	1	1	6	1	2	6	3	3	3	3	3	3	3	2	0	0	0	0	0	0	0	0	0	0	0	2	0	3	0	1	0	0	5	6	6	#NULL!	6	5	#NULL!	4	4
1	19	4	1	2	1	4	1	3	2	2	6	2	4	6	4	3	4	4	3	3	3	3	0	0	0	0	0	0	0	1	1	0	0	1	1	2	0	1	1	0	4	5	5	#NULL!	5	3	#NULL!	5	4
2	34	3	2	4	1	3	1	1	1	1	2	3	2	6	4	3	4	4	2	2	2	2	0	0	0	0	0	0	0	0	0	0	0	1	0	1	1	0	1	0	6	6	6	5	4	5	#NULL!	5	4
1	28	4	1	4	1	2	1	2	2	2	6	2	3	2	4	4	4	4	4	4	4	4	0	0	0	0	0	0	0	0	0	0	0	1	1	2	0	0	1	1	5	5	5	#NULL!	5	4	5	5	5
2	33	8	2	1	2	1	1	1	1	1	1	1	2	1	3	3	3	3	3	3	3	3	0	0	0	0	0	0	0	0	0	0	0	1	0	3	1	1	0	1	6	6	6	6	6	5	6	4	4
1	32	4	1	4	1	3	1	5	3	1	6	6	3	6	2	2	2	2	2	2	2	2	0	0	0	0	0	0	0	0	0	0	0	1	1	2	0	0	1	0	2	4	6	#NULL!	#NULL!	4	#NULL!	2	2
2	20	8	1	2	1	4	1	1	1	1	6	2	4	5	4	3	3	2	2	2	3	3	1	0	0	0	0	0	0	0	0	0	0	2	0	3	0	1	1	0	6	6	6	#NULL!	5	3	2	5	4
1	28	4	2	4	2	1	1	1	1	1	5	3	2	6	3	2	3	3	3	2	3	2	0	0	0	0	0	0	0	0	0	0	0	2	1	2	1	0	0	1	6	6	6	2	4	5	#NULL!	4	2
1	32	3	2	4	1	1	1	1	1	1	1	5	1	6	2	1	2	1	2	1	1	1	1	0	1	0	0	0	0	0	0	0	0	1	1	1	1	0	1	1	6	6	6	6	2	6	#NULL!	2	1
1	21	7	1	2	1	4	1	4	1	1	5	2	1	6	4	3	3	3	2	2	4	2	0	0	0	0	0	0	0	0	0	0	0	1	1	3	0	1	1	0	3	6	6	2	5	6	#NULL!	5	4
2	27	8	1	2	1	3	1	1	2	1	6	1	2	6	3	3	3	3	3	3	3	3	1	0	0	0	0	0	0	0	0	0	0	2	0	3	0	1	1	0	6	5	6	#NULL!	6	5	#NULL!	4	4
1	21	3	1	4	1	1	1	3	1	1	3	6	3	6	4	3	4	3	3	3	3	3	0	0	1	0	0	0	0	0	0	0	0	2	1	1	0	0	1	1	4	6	6	4	#NULL!	4	#NULL!	5	4
2	32	7	2	1	1	1	1	2	2	1	2	2	2	5	4	4	3	3	3	3	3	3	0	0	0	0	0	0	0	0	1	0	0	1	0	3	1	1	1	1	5	5	6	5	5	5	2	5	5
1	27	7	2	2	2	1	1	1	2	1	6	5	2	6	4	3	3	3	3	3	3	3	0	0	0	0	0	0	0	0	0	0	0	1	1	3	1	1	0	1	6	5	6	#NULL!	2	5	#NULL!	5	4
2	29	6	1	4	2	1	1	5	1	1	6	6	2	6	2	2	3	3	3	2	3	1	0	0	0	0	0	0	0	0	0	0	0	2	0	2	0	0	0	1	2	6	6	#NULL!	#NULL!	5	#NULL!	2	2
2	26	3	2	4	1	2	1	4	1	1	6	6	2	6	3	3	3	3	2	2	3	2	0	0	0	0	0	0	0	0	0	0	0	2	0	1	1	0	1	1	3	6	6	#NULL!	#NULL!	5	#NULL!	4	4
2	25	9	1	2	1	2	1	1	1	1	6	1	1	1	3	3	3	3	2	2	3	2	1	0	1	0	0	0	0	0	0	0	0	2	0	3	0	1	1	1	6	6	6	#NULL!	6	6	6	4	4
2	28	3	2	4	1	3	1	2	1	2	6	1	3	6	2	-1	-1	3	2	2	4	2	0	0	0	0	0	0	0	1	0	0	0	1	0	1	1	0	1	0	5	6	5	#NULL!	6	4	#NULL!	2	3
1	34	3	2	4	2	2	1	4	2	1	6	4	4	6	3	2	3	3	2	3	3	3	1	0	0	0	0	0	0	0	0	0	0	1	1	1	1	0	0	1	3	5	6	#NULL!	3	3	#NULL!	4	2
2	27	7	2	4	1	2	1	2	1	1	1	2	4	6	3	3	3	3	3	3	3	3	0	0	0	0	0	0	0	0	0	0	0	2	0	3	1	0	1	1	5	6	6	6	5	3	#NULL!	4	4
2	25	4	2	4	1	2	1	6	1	1	1	6	1	6	3	3	3	3	3	3	3	3	0	0	0	0	0	0	0	0	0	0	0	2	0	2	1	0	1	1	#NULL!	6	6	6	#NULL!	6	#NULL!	4	4
2	28	3	2	4	1	3	1	2	2	2	6	2	3	4	3	3	3	3	3	3	3	3	0	0	0	0	0	0	0	1	1	0	0	1	0	1	1	0	1	0	5	5	5	#NULL!	5	4	3	4	4
2	31	4	1	4	3	3	1	1	1	3	6	5	5	6	3	2	2	2	2	2	3	2	1	0	0	0	0	0	0	0	0	0	0	2	0	2	0	0	0	0	6	6	4	#NULL!	2	2	#NULL!	4	2
2	29	4	2	4	2	3	1	1	1	1	1	1	1	1	2	2	2	2	2	2	2	2	0	0	0	0	0	0	0	0	0	0	0	2	0	2	1	0	0	0	6	6	6	6	6	6	6	2	2
2	27	9	1	2	3	2	1	4	1	1	1	1	1	6	4	3	3	3	3	3	3	3	1	0	0	0	0	0	0	0	0	0	0	1	0	3	0	1	0	1	3	6	6	6	6	6	#NULL!	5	4
2	26	8	1	2	1	1	1	3	1	1	6	3	3	6	3	3	3	3	3	3	3	3	1	0	0	0	0	0	0	0	0	0	0	2	0	3	0	1	1	1	4	6	6	#NULL!	4	4	#NULL!	4	4
2	35	3	2	4	1	3	1	2	1	6	6	1	2	6	3	3	3	3	2	3	3	3	0	0	0	0	0	0	0	0	0	0	0	1	0	1	1	0	1	0	5	6	#NULL!	#NULL!	6	5	#NULL!	4	4
2	28	2	2	4	4	3	1	6	1	2	6	6	4	6	3	2	2	2	1	2	1	1	0	0	0	0	0	0	0	0	0	0	0	2	0	1	1	0	0	0	#NULL!	6	5	#NULL!	#NULL!	3	#NULL!	4	2
2	22	8	1	2	1	4	1	3	2	1	6	1	3	5	3	3	3	3	2	2	3	2	1	0	0	0	0	0	0	0	1	0	0	2	0	3	0	1	1	0	4	5	6	#NULL!	6	4	2	4	4
2	34	6	2	4	2	3	1	4	1	1	6	6	3	6	1	3	2	2	3	1	1	2	0	0	0	0	0	0	0	0	0	0	0	2	0	2	1	0	0	0	3	6	6	#NULL!	#NULL!	4	#NULL!	1	4
2	29	5	1	4	1	1	1	3	3	1	6	6	4	6	4	3	3	3	3	3	3	3	1	0	0	0	0	0	0	0	0	0	0	2	0	2	0	0	1	1	4	4	6	#NULL!	#NULL!	3	#NULL!	5	4
2	19	4	1	2	1	4	1	3	1	1	6	5	4	6	3	4	4	4	3	2	3	2	0	0	0	0	0	0	0	0	0	0	0	2	0	2	0	1	1	0	4	6	6	#NULL!	2	3	#NULL!	4	5
2	19	8	1	2	2	4	1	1	1	1	2	1	4	6	3	3	3	3	2	2	3	3	0	0	0	0	0	0	0	0	0	0	0	2	0	3	0	1	0	0	6	6	6	5	6	3	#NULL!	4	4
1	20	8	1	2	2	4	1	2	1	1	6	3	4	6	3	2	3	3	2	2	3	3	1	0	0	0	1	0	0	0	0	0	0	2	1	3	0	1	0	0	5	6	6	#NULL!	4	3	#NULL!	4	2
2	25	4	2	4	3	2	1	5	3	1	1	4	3	5	4	4	4	3	2	1	3	2	0	0	0	0	0	0	0	0	0	0	0	1	0	2	1	0	0	1	2	4	6	6	3	4	2	5	5
2	35	3	2	4	2	1	1	1	1	1	2	1	4	6	4	3	3	3	3	3	3	3	0	0	0	0	0	0	0	0	1	0	0	1	0	1	1	0	0	1	6	6	6	5	6	3	#NULL!	5	4
2	23	7	1	2	2	1	1	3	1	1	1	1	3	6	3	4	4	2	3	3	3	3	0	0	0	0	0	0	0	0	0	0	0	2	0	3	0	1	0	1	4	6	6	6	6	4	#NULL!	4	5
1	35	4	2	4	1	1	1	1	2	1	6	2	3	4	2	2	3	3	2	2	3	2	0	0	0	0	0	0	0	0	0	0	0	2	1	2	1	0	1	1	6	5	6	#NULL!	5	4	3	2	2
2	20	7	1	1	3	1	1	1	1	1	1	1	1	1	4	4	3	3	4	4	4	2	1	0	0	0	0	0	0	1	1	0	0	1	0	3	0	1	0	1	6	6	6	6	6	6	6	5	5
2	31	7	2	4	2	2	1	4	1	3	1	5	4	5	3	3	4	2	3	2	2	3	1	0	0	0	0	0	0	0	1	0	0	1	0	3	1	0	0	1	3	6	4	6	2	3	2	4	4
1	25	7	2	4	3	3	1	1	5	1	1	6	3	6	4	3	3	3	3	2	3	3	0	0	0	0	0	1	0	1	0	0	0	2	1	3	1	0	0	0	6	2	6	6	#NULL!	4	#NULL!	5	4
2	34	8	2	4	2	2	1	2	1	1	1	1	1	4	4	3	4	3	3	3	3	3	0	0	0	1	0	0	0	0	0	0	0	2	0	3	1	0	0	1	5	6	6	6	6	6	3	5	4
2	31	8	2	4	1	1	1	1	1	2	6	4	1	6	4	3	4	4	3	2	3	3	0	0	1	0	0	0	0	0	0	0	0	2	0	3	1	0	1	1	6	6	5	#NULL!	3	6	#NULL!	5	4
2	19	8	1	2	1	4	1	1	1	1	6	1	1	6	3	3	3	3	3	3	3	3	0	0	0	0	0	0	0	0	0	0	0	2	0	3	0	1	1	0	6	6	6	#NULL!	6	6	#NULL!	4	4
2	30	8	1	4	3	1	1	1	1	1	1	6	4	6	3	3	3	3	3	3	3	3	1	1	1	0	1	0	0	0	0	1	0	2	0	3	0	0	0	1	6	6	6	6	#NULL!	3	#NULL!	4	4
2	27	3	2	4	3	3	1	3	1	1	6	4	1	6	3	3	3	3	3	3	3	3	0	0	0	0	0	0	0	0	0	0	0	2	0	1	1	0	0	0	4	6	6	#NULL!	3	6	#NULL!	4	4
1	18	4	1	2	1	4	1	6	3	5	5	5	4	6	2	3	3	3	2	3	3	2	0	0	0	0	0	0	0	0	0	0	0	2	1	2	0	1	1	0	#NULL!	4	2	2	2	3	#NULL!	2	4
1	19	8	1	2	1	4	1	2	2	1	6	2	2	6	3	3	4	3	2	2	3	2	1	0	0	0	0	0	0	0	1	0	0	2	1	3	0	1	1	0	5	5	6	#NULL!	5	5	#NULL!	4	4
1	20	7	1	2	2	4	1	1	2	1	1	3	3	5	4	4	4	4	3	3	3	3	0	0	1	0	1	0	0	0	0	0	0	1	1	3	0	1	0	0	6	5	6	6	4	4	2	5	5
2	26	7	2	4	1	1	1	4	1	1	1	1	1	6	2	3	3	3	3	3	3	3	0	0	0	0	0	0	0	0	0	0	0	2	0	3	1	0	1	1	3	6	6	6	6	6	#NULL!	2	4
2	24	8	1	1	1	1	1	1	1	1	1	1	2	1	3	2	3	3	3	1	2	1	1	0	0	0	0	0	0	0	0	0	0	2	0	3	0	1	1	1	6	6	6	6	6	5	6	4	2
1	33	7	2	4	1	1	1	1	1	1	1	1	1	4	3	2	3	3	2	1	1	1	1	1	1	0	0	0	0	0	0	0	0	2	1	3	1	0	1	1	6	6	6	6	6	6	3	4	2
1	30	7	2	2	2	1	1	1	1	1	1	3	2	5	4	4	4	3	3	2	3	3	0	0	0	0	0	0	0	0	0	0	0	1	1	3	1	1	0	1	6	6	6	6	4	5	2	5	5
2	31	8	2	4	3	1	1	2	2	1	1	2	3	4	3	4	3	3	3	3	3	3	0	0	0	0	0	0	0	0	0	0	0	2	0	3	1	0	0	1	5	5	6	6	5	4	3	4	5
2	25	8	1	2	2	1	1	2	2	2	2	2	2	6	3	3	3	3	2	2	3	2	0	0	0	0	0	0	0	0	0	0	0	1	0	3	0	1	0	1	5	5	5	5	5	5	#NULL!	4	4
2	34	4	2	4	1	1	1	4	2	1	1	1	2	6	3	3	4	4	3	3	3	3	0	0	0	0	0	0	0	0	0	0	0	1	0	2	1	0	1	1	3	5	6	6	6	5	#NULL!	4	4
2	35	8	2	1	2	1	1	3	1	1	1	2	2	6	3	3	3	3	3	3	3	3	1	0	0	0	0	0	0	0	0	0	0	2	0	3	1	1	0	1	4	6	6	6	5	5	#NULL!	4	4
2	31	7	1	4	1	1	1	3	2	1	1	1	3	6	3	3	3	3	3	3	3	3	0	1	1	1	1	1	0	0	0	0	1	2	0	3	0	0	1	1	4	5	6	6	6	4	#NULL!	4	4
1	29	8	2	1	3	1	1	1	1	4	6	1	3	6	4	3	3	4	4	3	3	3	1	0	0	0	0	0	0	0	0	0	0	1	1	3	1	1	0	1	6	6	3	#NULL!	6	4	#NULL!	5	4
1	26	7	1	2	1	3	1	3	2	2	2	3	2	4	3	3	3	3	3	3	3	3	0	0	0	0	0	0	0	0	1	0	0	2	1	3	0	1	1	0	4	5	5	5	4	5	3	4	4
2	21	8	1	2	1	4	1	1	1	1	6	1	4	6	4	4	4	4	3	-1	3	3	1	0	0	0	0	0	0	0	0	0	0	2	0	3	0	1	1	0	6	6	6	#NULL!	6	3	#NULL!	5	5
2	19	7	1	2	1	4	1	3	1	1	6	5	2	6	3	3	4	3	3	3	3	3	0	0	0	0	0	0	0	1	0	0	0	1	0	3	0	1	1	0	4	6	6	#NULL!	2	5	#NULL!	4	4
2	35	3	2	4	1	1	1	6	6	6	1	1	6	6	1	2	2	2	2	2	1	2	0	0	0	0	0	0	0	0	0	0	0	2	0	1	1	0	1	1	#NULL!	#NULL!	#NULL!	6	6	#NULL!	#NULL!	1	2
2	31	8	2	4	2	1	1	5	2	1	1	2	2	5	4	4	3	3	3	3	3	3	0	0	0	0	0	0	0	0	0	0	1	2	0	3	1	0	0	1	2	5	6	6	5	5	2	5	5
1	23	8	6	2	1	4	1	3	2	1	2	3	3	6	4	3	3	3	3	3	3	3	1	0	0	0	0	0	0	0	0	0	0	2	1	3	1	1	1	0	4	5	6	5	4	4	#NULL!	5	4
2	32	9	1	4	2	1	1	2	1	1	1	3	3	3	3	3	2	3	3	2	3	2	1	0	0	0	0	0	0	0	0	0	0	2	0	3	0	0	0	1	5	6	6	6	4	4	4	4	4
1	18	4	1	2	1	4	1	2	1	2	3	2	3	6	4	3	4	3	3	2	3	3	0	1	0	0	0	0	0	0	1	0	0	2	1	2	0	1	1	0	5	6	5	4	5	4	#NULL!	5	4
1	31	8	2	4	2	1	1	3	1	1	3	3	1	3	3	3	3	3	3	2	3	3	1	0	0	0	0	0	0	0	0	0	0	2	1	3	1	0	0	1	4	6	6	4	4	6	4	4	4
1	18	8	1	2	1	4	1	1	1	1	6	2	4	6	3	1	3	3	3	3	3	3	1	1	0	0	1	0	0	0	1	0	0	2	1	3	0	1	1	0	6	6	6	#NULL!	5	3	#NULL!	4	1
2	18	4	1	2	2	3	1	4	2	1	6	3	4	6	2	3	3	3	2	3	3	3	1	0	0	0	0	0	0	0	0	0	0	2	0	2	0	1	0	0	3	5	6	#NULL!	4	3	#NULL!	2	4
2	32	9	2	1	2	1	1	2	2	2	1	3	2	5	3	3	3	3	2	3	3	3	1	0	0	0	0	0	0	0	0	0	0	2	0	3	1	1	0	1	5	5	5	6	4	5	2	4	4
1	20	7	1	2	1	4	1	1	1	1	6	3	3	6	3	4	4	3	3	3	3	2	1	0	0	0	0	0	0	0	0	0	0	2	1	3	0	1	1	0	6	6	6	#NULL!	4	4	#NULL!	4	5
2	20	8	1	4	3	4	1	2	2	3	4	2	5	6	3	3	3	3	3	3	3	3	0	0	0	0	0	0	0	0	0	0	0	2	0	3	0	0	0	0	5	5	4	3	5	2	#NULL!	4	4
2	32	3	2	4	1	3	1	2	1	1	2	2	2	2	3	3	3	3	3	3	3	3	0	0	0	0	0	0	0	0	0	0	0	1	0	1	1	0	1	0	5	6	6	5	5	5	5	4	4
1	34	3	1	4	1	1	1	2	2	2	6	6	3	6	4	4	4	4	4	4	2	2	1	0	0	0	0	0	0	0	0	0	0	1	1	1	0	0	1	1	5	5	5	#NULL!	#NULL!	4	#NULL!	5	5
2	28	5	2	4	1	2	1	1	1	1	1	1	4	6	3	3	3	3	3	3	3	3	0	0	0	0	0	0	0	0	0	0	0	2	0	2	1	0	1	1	6	6	6	6	6	3	#NULL!	4	4
2	20	8	1	4	1	2	1	2	4	2	3	2	2	4	3	3	3	3	3	3	3	3	0	0	0	0	0	0	0	0	0	0	0	1	0	3	0	0	1	1	5	3	5	4	5	5	3	4	4
2	23	8	1	2	2	3	1	3	1	1	6	1	1	6	3	3	3	3	2	2	3	3	0	0	0	0	0	0	0	0	0	0	0	2	0	3	0	1	0	0	4	6	6	#NULL!	6	6	#NULL!	4	4
1	33	8	2	1	2	1	1	1	1	1	6	4	3	6	3	3	3	3	3	3	3	3	0	0	0	0	0	0	0	0	0	0	0	2	1	3	1	1	0	1	6	6	6	#NULL!	3	4	#NULL!	4	4
2	21	8	1	2	1	4	1	2	1	1	6	2	2	6	3	4	3	3	3	3	3	3	0	0	0	0	0	0	0	0	1	0	0	1	0	3	0	1	1	0	5	6	6	#NULL!	5	5	#NULL!	4	5
2	27	7	2	4	1	1	1	1	1	1	1	1	3	6	4	3	4	4	3	3	3	3	0	0	0	0	0	0	0	0	0	0	0	2	0	3	1	0	1	1	6	6	6	6	6	4	#NULL!	5	4
1	19	7	1	4	1	4	1	1	1	1	4	1	3	6	4	3	4	4	3	3	3	3	0	0	0	0	0	0	0	0	0	0	0	2	1	3	0	0	1	0	6	6	6	3	6	4	#NULL!	5	4
1	34	3	1	1	3	3	1	1	1	1	6	2	5	6	4	4	4	4	4	4	4	4	1	0	0	0	0	0	0	0	0	0	0	2	1	1	0	1	0	0	6	6	6	#NULL!	5	2	#NULL!	5	5
1	20	8	1	4	1	4	1	1	1	1	4	2	1	6	4	4	4	4	4	4	4	4	1	0	0	0	0	0	0	0	1	0	0	2	1	3	0	0	1	0	6	6	6	3	5	6	#NULL!	5	5
2	23	7	1	2	3	1	1	1	1	1	1	2	2	4	4	4	3	4	3	3	3	4	1	0	0	0	0	0	0	0	0	0	0	2	0	3	0	1	0	1	6	6	6	6	5	5	3	5	5
2	30	5	2	4	1	1	1	6	2	1	6	1	2	6	3	3	2	3	3	2	2	2	0	0	0	0	0	0	0	0	0	0	1	2	0	2	1	0	1	1	#NULL!	5	6	#NULL!	6	5	#NULL!	4	4
1	26	7	1	2	2	2	1	6	1	1	1	1	1	5	3	3	3	3	3	3	3	3	0	0	0	0	0	0	0	0	0	0	0	1	1	3	0	1	0	1	#NULL!	6	6	6	6	6	2	4	4
2	21	7	1	2	1	4	1	3	1	1	5	1	3	6	4	3	3	3	3	3	3	3	0	0	0	0	0	0	0	0	0	0	0	2	0	3	0	1	1	0	4	6	6	2	6	4	#NULL!	5	4
1	25	9	1	4	2	4	1	1	1	2	6	1	2	6	4	3	3	3	2	2	2	1	1	0	0	0	0	0	0	0	1	0	0	2	1	3	0	0	0	0	6	6	5	#NULL!	6	5	#NULL!	5	4
2	19	4	1	2	1	4	1	3	1	1	6	6	6	6	4	3	4	4	2	3	3	3	0	0	0	0	0	0	0	0	0	0	0	2	0	2	0	1	1	0	4	6	6	#NULL!	#NULL!	#NULL!	#NULL!	5	4
1	25	7	1	2	1	2	1	4	4	1	2	6	2	5	4	3	3	3	3	3	3	3	1	0	0	0	0	0	0	0	0	0	0	2	1	3	0	1	1	1	3	3	6	5	#NULL!	5	2	5	4
1	33	1	1	4	1	1	1	3	2	2	6	6	5	6	4	3	3	2	3	3	3	2	0	0	0	0	0	0	0	0	0	0	0	2	1	1	0	0	1	1	4	5	5	#NULL!	#NULL!	2	#NULL!	5	4
1	28	4	1	4	1	1	1	6	2	2	6	3	3	6	4	4	4	4	2	3	3	3	0	0	0	0	0	0	0	0	0	0	0	1	1	2	0	0	1	1	#NULL!	5	5	#NULL!	4	4	#NULL!	5	5
1	19	8	1	2	1	4	1	2	1	1	6	1	3	5	3	3	3	3	3	2	3	3	1	0	0	0	0	0	0	0	0	0	0	2	1	3	0	1	1	0	5	6	6	#NULL!	6	4	2	4	4
1	18	4	1	4	1	4	1	3	1	4	6	1	5	6	4	4	3	4	3	3	4	2	0	0	0	0	0	0	0	0	0	0	0	2	1	2	0	0	1	0	4	6	3	#NULL!	6	2	#NULL!	5	5
2	30	4	2	4	1	1	1	6	1	1	1	2	4	6	3	2	2	3	2	3	2	2	0	0	0	0	0	0	0	0	0	0	0	2	0	2	1	0	1	1	#NULL!	6	6	6	5	3	#NULL!	4	2
2	21	8	1	2	1	4	1	2	1	1	6	1	3	1	3	3	3	3	3	3	3	3	0	0	0	0	0	0	0	0	0	0	0	1	0	3	0	1	1	0	5	6	6	#NULL!	6	4	6	4	4
2	22	8	1	2	2	4	1	1	2	2	6	2	4	6	4	4	3	3	2	2	3	3	0	1	0	0	0	0	0	0	0	0	0	2	0	3	0	1	0	0	6	5	5	#NULL!	5	3	#NULL!	5	5
1	20	7	1	2	1	4	1	1	1	1	1	1	2	3	3	3	3	3	3	3	3	3	1	1	0	1	0	0	0	0	0	0	0	2	1	3	0	1	1	0	6	6	6	6	6	5	4	4	4
2	25	7	1	2	2	4	1	2	1	1	6	4	1	6	3	3	3	2	2	2	2	1	1	0	0	0	0	0	0	0	0	0	0	2	0	3	0	1	0	0	5	6	6	#NULL!	3	6	#NULL!	4	4
1	28	8	1	4	1	1	1	1	1	1	1	3	2	6	4	3	3	3	3	3	3	3	0	0	0	0	0	0	0	0	0	0	0	2	1	3	0	0	1	1	6	6	6	6	4	5	#NULL!	5	4
2	33	3	2	4	1	3	1	1	1	1	6	2	5	6	3	3	3	3	3	2	3	3	1	0	0	0	0	0	0	0	0	0	0	1	0	1	1	0	1	0	6	6	6	#NULL!	5	2	#NULL!	4	4
2	26	4	2	4	3	3	1	5	1	1	6	6	2	6	3	3	3	3	2	2	3	2	0	0	0	0	0	0	0	0	0	0	0	1	0	2	1	0	0	0	2	6	6	#NULL!	#NULL!	5	#NULL!	4	4
2	35	3	2	4	2	1	1	5	5	1	6	5	4	6	3	2	3	-1	3	2	-1	2	0	0	0	0	0	0	0	0	0	0	0	2	0	1	1	0	0	1	2	2	6	#NULL!	2	3	#NULL!	4	2
2	20	7	1	2	2	4	1	2	1	1	2	2	4	6	3	3	3	3	3	3	3	3	1	0	0	0	0	0	0	0	0	0	0	2	0	3	0	1	0	0	5	6	6	5	5	3	#NULL!	4	4
1	35	7	2	4	3	1	1	3	4	1	1	2	4	5	3	3	3	2	2	3	3	3	0	0	1	0	0	0	0	0	0	0	0	2	1	3	1	0	0	1	4	3	6	6	5	3	2	4	4
2	31	3	2	4	1	3	1	3	5	1	4	1	5	6	3	3	3	3	2	-1	4	3	0	0	0	0	0	0	0	0	0	0	0	1	0	1	1	0	1	0	4	2	6	3	6	2	#NULL!	4	4
1	18	4	1	2	2	4	1	1	1	1	6	3	2	6	3	2	2	3	3	1	3	1	1	0	0	0	0	0	0	0	0	0	0	2	1	2	0	1	0	0	6	6	6	#NULL!	4	5	#NULL!	4	2
2	21	5	1	2	2	1	1	1	1	1	1	3	2	6	3	3	3	3	3	3	3	3	1	0	0	0	0	0	0	0	0	0	0	2	0	2	0	1	0	1	6	6	6	6	4	5	#NULL!	4	4
1	19	8	1	4	1	4	1	3	2	4	6	2	6	6	3	3	4	3	3	3	3	4	0	0	0	0	0	0	0	0	0	0	0	2	1	3	0	0	1	0	4	5	3	#NULL!	5	#NULL!	#NULL!	4	4
2	20	8	1	2	3	4	1	5	1	1	6	2	2	6	3	2	3	3	3	3	3	3	1	0	0	0	0	0	0	0	1	0	0	2	0	3	0	1	0	0	2	6	6	#NULL!	5	5	#NULL!	4	2
2	28	2	2	4	1	3	1	4	1	1	6	1	5	6	3	3	3	3	3	3	3	3	0	0	0	0	0	0	0	0	0	0	0	2	0	1	1	0	1	0	3	6	6	#NULL!	6	2	#NULL!	4	4
2	35	4	2	4	3	1	1	1	3	1	6	3	2	6	3	3	3	3	3	3	3	3	1	0	1	0	1	0	0	1	1	0	0	1	0	2	1	0	0	1	6	4	6	#NULL!	4	5	#NULL!	4	4
1	22	8	1	2	3	4	1	1	1	1	3	3	5	6	4	3	4	4	4	4	4	4	1	0	0	0	0	0	0	0	0	0	0	2	1	3	0	1	0	0	6	6	6	4	4	2	#NULL!	5	4
2	35	2	2	4	1	3	1	6	2	2	6	6	2	6	3	3	4	3	3	3	3	3	1	0	0	0	0	0	0	0	0	0	0	2	0	1	1	0	1	0	#NULL!	5	5	#NULL!	#NULL!	5	#NULL!	4	4
2	29	3	2	4	3	3	1	5	5	2	5	4	4	6	4	4	4	4	4	4	4	3	0	0	0	0	0	0	0	0	0	0	0	2	0	1	1	0	0	0	2	2	5	2	3	3	#NULL!	5	5
1	21	8	1	2	1	4	1	3	1	1	3	2	4	6	4	4	4	3	3	3	3	2	1	1	0	0	0	0	0	0	1	0	1	1	1	3	0	1	1	0	4	6	6	4	5	3	#NULL!	5	5
1	23	3	1	4	1	2	1	6	2	1	6	6	4	6	4	3	3	3	3	3	3	3	1	0	0	0	0	0	0	0	0	0	0	1	1	1	0	0	1	1	#NULL!	5	6	#NULL!	#NULL!	3	#NULL!	5	4
1	25	4	1	4	3	1	1	1	2	1	6	1	2	1	4	3	3	4	-1	-1	4	2	0	0	0	0	0	0	0	0	0	0	0	1	1	2	0	0	0	1	6	5	6	#NULL!	6	5	6	5	4
1	32	4	2	4	3	1	1	1	1	1	1	3	2	6	3	2	3	3	2	1	3	3	0	0	0	0	0	0	0	0	0	0	0	1	1	2	1	0	0	1	6	6	6	6	4	5	#NULL!	4	2
1	23	3	2	4	3	1	1	4	1	1	1	4	4	6	2	3	3	2	4	4	4	3	1	0	0	0	0	0	0	0	0	0	0	1	1	1	1	0	0	1	3	6	6	6	3	3	#NULL!	2	4
1	27	3	2	4	1	1	1	6	1	1	6	6	6	6	3	3	3	3	3	3	3	3	0	0	0	0	0	0	0	0	0	0	0	2	1	1	1	0	1	1	#NULL!	6	6	#NULL!	#NULL!	#NULL!	#NULL!	4	4
1	28	3	2	4	1	1	1	3	2	1	6	6	5	6	3	3	-1	3	3	2	3	-1	0	0	0	0	0	0	0	0	0	0	0	1	1	1	1	0	1	1	4	5	6	#NULL!	#NULL!	2	#NULL!	4	4
2	20	8	1	2	1	4	1	1	1	2	6	2	4	4	3	3	3	3	3	3	3	3	1	0	0	0	0	0	0	0	0	0	0	2	0	3	0	1	1	0	6	6	5	#NULL!	5	3	3	4	4
1	27	7	1	4	1	2	1	1	1	1	1	1	1	1	2	3	2	3	3	3	3	3	0	0	0	0	0	0	0	0	0	0	0	2	1	3	0	0	1	1	6	6	6	6	6	6	6	2	4
2	25	5	2	4	3	2	1	6	3	1	6	2	2	6	3	2	3	3	2	2	2	1	0	0	0	0	0	0	0	0	0	0	0	2	0	2	1	0	0	1	#NULL!	4	6	#NULL!	5	5	#NULL!	4	2
1	29	7	2	4	1	1	1	4	1	1	4	6	4	6	4	4	4	4	4	4	4	4	0	0	0	0	0	0	0	0	0	0	0	1	1	3	1	0	1	1	3	6	6	3	#NULL!	3	#NULL!	5	5
2	22	3	2	4	1	1	1	5	1	1	6	6	4	6	3	-1	3	3	3	3	2	3	0	0	0	0	0	0	0	0	0	0	0	2	0	1	1	0	1	1	2	6	6	#NULL!	#NULL!	3	#NULL!	4	3
2	35	3	2	4	1	3	1	1	1	3	6	3	4	6	3	2	3	3	2	2	3	2	0	0	0	0	0	0	0	1	0	0	0	1	0	1	1	0	1	0	6	6	4	#NULL!	4	3	#NULL!	4	2
2	33	9	2	1	2	1	1	1	1	1	1	3	2	4	2	1	3	3	3	3	3	3	1	1	0	0	0	0	0	0	0	0	0	1	0	3	1	1	0	1	6	6	6	6	4	5	3	2	1
2	30	3	2	4	1	3	1	1	6	5	6	6	3	6	3	2	2	2	3	3	1	2	0	0	0	0	0	0	0	0	0	0	0	1	0	1	1	0	1	0	6	#NULL!	2	#NULL!	#NULL!	4	#NULL!	4	2
2	25	8	2	4	2	1	1	2	1	1	1	1	1	2	4	4	4	3	3	4	4	3	0	0	0	0	0	0	0	0	0	0	0	2	0	3	1	0	0	1	5	6	6	6	6	6	5	5	5
1	28	9	2	1	2	1	1	1	2	2	1	2	4	6	3	3	3	3	2	2	3	2	0	0	0	0	0	0	0	0	0	0	0	2	1	3	1	1	0	1	6	5	5	6	5	3	#NULL!	4	4
1	24	4	1	4	3	1	1	1	2	2	6	6	3	6	4	3	3	4	3	3	4	3	1	0	0	0	0	0	0	0	0	0	0	2	1	2	0	0	0	1	6	5	5	#NULL!	#NULL!	4	#NULL!	5	4
2	19	8	1	2	1	4	1	1	1	1	6	1	3	6	3	3	3	3	3	2	2	2	1	0	0	1	0	0	0	0	1	0	0	2	0	3	0	1	1	0	6	6	6	#NULL!	6	4	#NULL!	4	4
1	23	8	1	2	3	1	1	5	2	3	2	5	2	6	4	3	3	3	3	3	3	3	1	0	0	0	0	0	0	0	1	0	0	2	1	3	0	1	0	1	2	5	4	5	2	5	#NULL!	5	4
2	23	9	1	2	1	4	1	2	3	2	2	2	2	6	3	3	3	3	3	3	3	2	1	0	0	0	0	0	0	0	0	0	0	2	0	3	0	1	1	0	5	4	5	5	5	5	#NULL!	4	4
2	27	8	1	2	2	1	1	1	1	1	1	1	4	5	3	3	3	3	3	2	3	3	1	0	1	0	1	0	0	0	1	0	0	2	0	3	0	1	0	1	6	6	6	6	6	3	2	4	4
1	18	4	1	2	1	4	1	2	3	2	6	1	4	6	1	4	4	4	4	3	4	1	1	0	0	0	0	0	0	0	0	0	0	2	1	2	0	1	1	0	5	4	5	#NULL!	6	3	#NULL!	1	5
1	32	3	2	4	1	1	1	3	3	2	2	1	5	6	1	3	3	3	2	1	3	2	0	0	0	0	0	0	0	0	0	0	0	2	1	1	1	0	1	1	4	4	5	5	6	2	#NULL!	1	4
2	27	3	1	4	1	1	1	6	1	3	6	6	6	6	4	4	4	4	4	4	4	4	0	0	0	0	0	0	0	0	0	0	0	2	0	1	0	0	1	1	#NULL!	6	4	#NULL!	#NULL!	#NULL!	#NULL!	5	5
1	27	7	2	4	1	1	1	1	1	1	1	1	1	6	2	1	3	2	2	1	2	2	1	0	0	0	0	0	0	0	0	0	0	2	1	3	1	0	1	1	6	6	6	6	6	6	#NULL!	2	1
2	19	8	1	4	3	4	1	2	3	3	6	2	4	6	4	3	3	3	3	3	3	3	0	0	0	0	0	0	0	1	0	0	0	2	0	3	0	0	0	0	5	4	4	#NULL!	5	3	#NULL!	5	4
1	32	8	1	4	2	1	1	2	1	3	6	2	4	6	3	2	3	2	1	1	3	2	0	0	1	0	0	0	0	0	0	0	0	2	1	3	0	0	0	1	5	6	4	#NULL!	5	3	#NULL!	4	2
2	22	8	1	1	2	2	1	3	1	1	2	2	4	1	4	3	3	2	3	3	2	-1	1	1	1	0	0	0	0	0	0	0	0	2	0	3	0	1	0	1	4	6	6	5	5	3	6	5	4
1	25	8	1	1	3	1	1	1	1	1	1	1	1	1	4	4	4	4	3	2	3	3	0	0	0	0	0	0	0	0	0	0	0	2	1	3	0	1	0	1	6	6	6	6	6	6	6	5	5
2	25	8	1	1	3	1	1	1	1	1	1	2	2	6	4	3	4	3	2	2	3	2	1	0	0	1	0	0	0	0	0	0	0	2	0	3	0	1	0	1	6	6	6	6	5	5	#NULL!	5	4
1	30	3	2	4	1	3	1	1	1	1	2	2	2	2	4	2	2	3	2	3	2	2	1	0	0	0	0	0	0	0	0	0	0	2	1	1	1	0	1	0	6	6	6	5	5	5	5	5	2
2	19	3	1	4	1	4	1	2	1	2	6	1	2	4	4	4	4	4	4	4	4	4	1	0	0	0	0	0	0	0	0	0	0	2	0	1	0	0	1	0	5	6	5	#NULL!	6	5	3	5	5
2	29	7	2	2	3	1	1	1	1	1	1	2	1	6	3	3	3	3	3	3	3	3	0	0	1	0	1	0	0	0	1	0	0	2	0	3	1	1	0	1	6	6	6	6	5	6	#NULL!	4	4
2	21	4	1	4	1	2	1	3	2	2	3	5	4	6	2	3	3	3	3	3	3	3	1	0	0	0	0	0	0	0	1	0	0	2	0	2	0	0	1	1	4	5	5	4	2	3	#NULL!	2	4
1	20	8	1	2	1	4	1	3	1	1	6	1	6	6	4	4	4	3	2	2	3	2	0	0	0	0	0	0	0	0	0	0	0	2	1	3	0	1	1	0	4	6	6	#NULL!	6	#NULL!	#NULL!	5	5
1	23	8	1	2	2	3	1	3	2	2	6	1	2	6	4	4	4	3	3	3	3	3	0	0	0	0	0	0	0	0	0	0	0	2	1	3	0	1	0	0	4	5	5	#NULL!	6	5	#NULL!	5	5
2	18	4	1	4	1	4	1	3	1	1	6	2	1	6	3	3	3	2	3	3	2	3	0	0	0	0	0	0	0	0	0	0	0	2	0	2	0	0	1	0	4	6	6	#NULL!	5	6	#NULL!	4	4
1	26	8	2	2	3	1	1	6	2	1	6	4	2	5	3	3	4	3	3	3	4	3	1	0	0	0	0	0	0	0	0	0	0	2	1	3	1	1	0	1	#NULL!	5	6	#NULL!	3	5	2	4	4
2	21	8	1	2	1	4	1	1	1	1	6	2	2	6	3	3	3	2	2	1	2	2	0	0	0	0	0	0	0	0	0	0	0	2	0	3	0	1	1	0	6	6	6	#NULL!	5	5	#NULL!	4	4
2	34	3	2	4	2	3	1	5	2	1	6	1	3	6	2	3	3	3	2	3	3	2	0	0	0	0	0	0	0	0	0	0	0	2	0	1	1	0	0	0	2	5	6	#NULL!	6	4	#NULL!	2	4
2	35	2	3	4	1	3	1	5	5	3	4	2	3	3	2	2	2	2	2	2	2	3	0	0	0	0	0	0	0	0	0	0	0	2	0	1	1	0	1	0	2	2	4	3	5	4	4	2	2
2	18	4	1	2	1	4	1	1	2	2	2	1	2	6	4	3	3	3	2	2	3	2	1	1	0	0	1	0	0	0	0	0	0	2	0	2	0	1	1	0	6	5	5	5	6	5	#NULL!	5	4
2	33	6	2	4	1	3	1	6	6	6	6	3	6	6	3	3	3	3	3	3	3	3	0	0	0	0	0	0	0	0	0	0	0	1	0	2	1	0	1	0	#NULL!	#NULL!	#NULL!	#NULL!	4	#NULL!	#NULL!	4	4
2	23	3	2	2	1	3	1	3	1	1	6	5	2	6	3	3	3	3	2	3	3	2	0	0	0	0	0	0	0	0	0	0	0	2	0	1	1	1	1	0	4	6	6	#NULL!	2	5	#NULL!	4	4
1	28	8	1	4	1	1	1	2	3	1	1	2	2	1	4	3	3	3	3	2	3	2	0	0	0	0	0	0	0	1	1	0	1	1	1	3	0	0	1	1	5	4	6	6	5	5	6	5	4
2	29	9	1	4	2	1	1	1	2	1	2	4	3	3	3	2	3	3	3	2	2	2	1	0	0	0	0	0	0	0	0	0	0	2	0	3	0	0	0	1	6	5	6	5	3	4	4	4	2
2	25	9	1	2	1	2	1	2	1	1	6	1	2	1	4	4	4	3	3	3	3	3	1	0	0	0	0	0	0	0	1	0	0	2	0	3	0	1	1	1	5	6	6	#NULL!	6	5	6	5	5
1	23	8	1	2	2	3	1	1	3	1	6	1	4	6	3	4	3	3	2	2	2	2	0	0	0	0	0	0	0	0	0	0	0	1	1	3	0	1	0	0	6	4	6	#NULL!	6	3	#NULL!	4	5
2	35	5	2	4	1	3	1	3	1	1	6	6	1	6	3	2	3	3	3	3	2	1	0	0	0	0	0	0	0	0	0	0	0	2	0	2	1	0	1	0	4	6	6	#NULL!	#NULL!	6	#NULL!	4	2
1	25	8	1	2	1	2	1	2	2	2	2	4	4	4	3	3	3	3	3	2	3	2	0	0	0	0	0	0	0	0	0	0	0	2	1	3	0	1	1	1	5	5	5	5	3	3	3	4	4
2	21	8	1	2	3	4	1	3	1	1	4	2	2	5	4	3	3	3	2	3	3	3	0	0	0	0	0	0	0	0	0	0	0	2	0	3	0	1	0	0	4	6	6	3	5	5	2	5	4
2	32	8	2	1	3	1	1	1	1	1	6	2	1	5	4	4	3	3	2	3	3	3	0	0	0	0	0	0	0	0	0	0	0	1	0	3	1	1	0	1	6	6	6	#NULL!	5	6	2	5	5
2	20	7	1	2	1	4	1	2	2	2	6	2	2	6	3	3	3	3	3	3	3	3	0	0	0	0	0	0	0	0	0	0	0	2	0	3	0	1	1	0	5	5	5	#NULL!	5	5	#NULL!	4	4
1	30	3	2	4	1	1	1	5	1	4	1	6	5	6	1	2	2	2	2	2	2	2	0	0	0	0	0	0	0	0	0	0	0	2	1	1	1	0	1	1	2	6	3	6	#NULL!	2	#NULL!	1	2
2	18	4	1	2	3	4	1	6	1	1	6	3	2	6	3	3	3	2	3	3	3	3	0	0	0	0	0	0	0	0	0	0	0	2	0	2	0	1	0	0	#NULL!	6	6	#NULL!	4	5	#NULL!	4	4
2	35	5	2	4	1	1	1	1	1	1	3	1	2	6	4	-1	3	3	3	3	3	4	0	0	0	0	0	0	0	1	0	0	0	1	0	2	1	0	1	1	6	6	6	4	6	5	#NULL!	5	3
2	27	7	1	2	1	1	1	3	1	1	1	3	3	6	4	3	3	3	2	2	3	2	0	0	0	0	0	1	0	1	0	0	0	1	0	3	0	1	1	1	4	6	6	6	4	4	#NULL!	5	4
2	31	3	2	4	1	3	1	6	1	2	3	3	1	3	2	3	2	3	3	3	3	3	0	0	0	0	0	0	0	0	0	0	0	2	0	1	1	0	1	0	#NULL!	6	5	4	4	6	4	2	4
2	18	4	1	2	1	4	1	3	2	3	6	2	4	6	4	3	3	3	3	2	3	2	1	0	0	0	0	0	0	0	0	0	0	2	0	2	0	1	1	0	4	5	4	#NULL!	5	3	#NULL!	5	4
1	25	8	1	2	1	3	1	1	4	1	6	1	3	6	4	3	3	3	3	3	3	3	1	0	1	0	0	0	0	0	0	0	0	2	1	3	0	1	1	0	6	3	6	#NULL!	6	4	#NULL!	5	4
2	19	4	1	2	1	3	1	3	2	1	6	4	2	6	1	3	3	3	2	2	3	3	1	0	0	0	0	0	0	0	1	0	0	2	0	2	0	1	1	0	4	5	6	#NULL!	3	5	#NULL!	1	4
1	21	8	1	2	1	4	1	2	3	2	6	3	3	6	3	3	4	4	3	3	4	3	1	0	0	0	0	0	0	0	1	0	0	2	1	3	0	1	1	0	5	4	5	#NULL!	4	4	#NULL!	4	4
1	29	8	1	1	1	1	1	1	2	1	1	1	2	5	3	3	3	3	3	3	3	3	0	0	0	0	0	0	0	0	0	0	0	2	1	3	0	1	1	1	6	5	6	6	6	5	2	4	4
2	28	7	1	4	3	1	1	1	2	1	6	4	1	6	3	3	3	3	2	2	3	3	1	0	0	0	0	0	0	0	0	0	0	1	0	3	0	0	0	1	6	5	6	#NULL!	3	6	#NULL!	4	4
1	28	7	1	4	1	1	1	4	1	2	6	6	3	6	2	3	4	4	4	4	3	3	0	0	0	0	0	0	0	0	0	0	0	1	1	3	0	0	1	1	3	6	5	#NULL!	#NULL!	4	#NULL!	2	4
2	25	7	1	2	2	1	1	2	2	1	2	4	3	5	4	4	4	3	3	3	3	3	1	0	0	0	0	0	0	0	0	0	0	2	0	3	0	1	0	1	5	5	6	5	3	4	2	5	5
2	24	7	1	2	1	1	1	2	2	1	2	2	2	3	3	3	3	3	3	3	3	3	1	0	0	0	0	0	0	0	0	0	0	2	0	3	0	1	1	1	5	5	6	5	5	5	4	4	4
2	30	3	2	4	1	3	1	6	6	6	6	6	2	6	-1	-1	-1	-1	-1	-1	-1	-1	0	0	0	0	0	0	0	0	0	0	0	1	0	1	1	0	1	0	#NULL!	#NULL!	#NULL!	#NULL!	#NULL!	5	#NULL!	3	3
2	29	3	2	4	3	3	1	3	2	1	6	5	2	5	3	3	3	3	3	2	3	2	0	1	0	0	0	0	0	0	0	0	0	2	0	1	1	0	0	0	4	5	6	#NULL!	2	5	2	4	4
1	29	8	2	4	3	1	1	1	3	2	6	3	2	5	4	3	3	3	2	2	3	3	1	0	0	0	0	0	0	0	0	0	0	1	1	3	1	0	0	1	6	4	5	#NULL!	4	5	2	5	4
2	27	4	2	4	1	1	1	3	1	1	1	6	2	6	3	3	3	3	3	3	3	3	0	0	0	0	0	0	0	0	0	0	0	2	0	2	1	0	1	1	4	6	6	6	#NULL!	5	#NULL!	4	4
1	27	8	1	4	2	4	1	4	2	2	1	1	4	5	4	2	3	3	-1	-1	3	-1	1	0	1	0	0	0	0	0	0	0	0	2	1	3	0	0	0	0	3	5	5	6	6	3	2	5	2
2	20	8	1	2	3	4	1	1	1	1	2	2	2	6	3	3	3	3	3	2	3	2	1	0	0	0	0	0	0	0	0	0	0	2	0	3	0	1	0	0	6	6	6	5	5	5	#NULL!	4	4
1	19	8	1	2	3	4	1	2	1	1	6	3	2	4	2	3	3	3	3	3	3	3	1	0	1	0	1	1	1	0	1	0	0	2	1	3	0	1	0	0	5	6	6	#NULL!	4	5	3	2	4
2	35	5	2	4	1	3	1	5	2	1	6	1	2	6	3	3	-1	3	3	-1	3	-1	0	0	0	0	0	0	0	0	0	0	0	2	0	2	1	0	1	0	2	5	6	#NULL!	6	5	#NULL!	4	4
2	33	7	2	1	1	1	1	1	1	5	1	1	2	6	3	3	3	3	3	3	3	3	0	0	0	0	0	0	0	0	0	0	0	1	0	3	1	1	1	1	6	6	2	6	6	5	#NULL!	4	4
2	30	3	2	4	3	1	1	4	6	1	6	6	6	6	-1	2	3	3	3	-1	2	2	0	0	0	0	0	0	0	0	0	0	0	2	0	1	1	0	0	1	3	#NULL!	6	#NULL!	#NULL!	#NULL!	#NULL!	3	2
1	20	7	1	2	1	4	1	3	2	4	6	3	4	6	4	4	4	4	4	4	4	4	0	0	0	0	0	0	0	0	0	0	0	2	1	3	0	1	1	0	4	5	3	#NULL!	4	3	#NULL!	5	5
2	21	7	1	2	1	4	1	1	1	1	6	3	3	6	3	3	4	3	3	3	3	3	0	0	0	0	0	0	0	0	1	0	0	2	0	3	0	1	1	0	6	6	6	#NULL!	4	4	#NULL!	4	4
2	29	4	1	4	1	1	1	3	1	1	1	1	1	6	2	2	3	3	2	2	3	3	1	1	0	0	0	0	0	0	1	0	0	1	0	2	0	0	1	1	4	6	6	6	6	6	#NULL!	2	2
1	22	7	1	2	1	4	1	2	2	1	6	1	4	6	4	3	3	3	3	3	3	3	0	0	0	0	0	0	0	0	1	0	0	1	1	3	0	1	1	0	5	5	6	#NULL!	6	3	#NULL!	5	4
2	27	8	2	1	1	1	1	1	1	1	1	1	1	1	3	3	3	3	3	3	3	3	0	0	0	0	0	0	0	0	0	0	0	2	0	3	1	1	1	1	6	6	6	6	6	6	6	4	4
2	35	3	2	4	1	2	1	5	1	3	2	2	2	5	1	3	4	3	2	3	3	3	0	0	0	0	0	0	0	1	1	0	0	1	0	1	1	0	1	1	2	6	4	5	5	5	2	1	4
2	30	5	2	4	3	3	1	5	1	1	5	1	1	5	3	3	3	3	3	3	3	3	1	0	0	0	0	0	0	0	0	0	0	2	0	2	1	0	0	0	2	6	6	2	6	6	2	4	4
2	21	7	1	2	1	4	1	1	2	1	6	1	4	6	4	3	4	3	2	2	3	3	1	0	0	0	0	0	0	0	0	0	1	2	0	3	0	1	1	0	6	5	6	#NULL!	6	3	#NULL!	5	4
1	21	6	1	2	1	3	1	3	1	2	6	6	5	6	3	3	3	3	3	3	3	3	1	0	0	0	0	0	0	0	0	0	0	2	1	2	0	1	1	0	4	6	5	#NULL!	#NULL!	2	#NULL!	4	4
2	25	7	1	2	1	1	1	2	2	2	2	2	2	2	4	4	4	4	3	3	3	3	0	0	0	0	0	0	0	0	0	0	0	2	0	3	0	1	1	1	5	5	5	5	5	5	5	5	5
2	20	7	1	2	1	4	1	3	1	2	6	3	3	6	3	3	3	3	2	2	2	2	1	0	0	0	0	0	0	1	0	0	0	2	0	3	0	1	1	0	4	6	5	#NULL!	4	4	#NULL!	4	4
2	21	3	1	4	1	3	1	3	1	1	4	3	1	6	4	4	4	4	3	3	3	3	0	0	0	0	0	0	0	0	0	0	0	2	0	1	0	0	1	0	4	6	6	3	4	6	#NULL!	5	5
2	28	3	2	4	1	1	1	6	1	6	1	6	2	6	3	3	3	3	3	3	3	3	0	0	0	0	0	0	0	0	0	0	0	1	0	1	1	0	1	1	#NULL!	6	#NULL!	6	#NULL!	5	#NULL!	4	4
2	19	8	1	2	1	4	1	1	1	1	2	1	3	6	4	3	3	3	2	2	3	3	1	0	0	0	0	0	0	0	0	0	0	1	0	3	0	1	1	0	6	6	6	5	6	4	#NULL!	5	4
2	31	2	2	4	1	1	1	2	2	1	6	1	2	6	3	3	3	3	3	3	3	3	0	0	0	0	0	0	0	1	0	0	0	1	0	1	1	0	1	1	5	5	6	#NULL!	6	5	#NULL!	4	4
1	24	3	2	4	1	1	1	1	2	1	5	1	3	6	4	4	4	4	4	4	4	4	1	1	1	1	1	0	1	0	1	0	0	1	1	1	1	0	1	1	6	5	6	2	6	4	#NULL!	5	5
2	21	8	1	2	2	4	1	1	1	1	6	2	2	6	4	3	3	3	3	2	4	3	1	0	0	1	1	1	0	0	0	0	0	1	0	3	0	1	0	0	6	6	6	#NULL!	5	5	#NULL!	5	4
2	23	8	2	2	2	1	1	1	1	1	2	1	1	4	3	3	3	3	3	3	3	3	1	0	0	0	0	0	0	0	1	0	0	2	0	3	1	1	0	1	6	6	6	5	6	6	3	4	4
2	31	3	2	4	1	3	1	1	1	6	6	6	4	6	-1	-1	2	3	2	-1	3	2	0	0	0	0	0	0	0	1	0	0	0	1	0	1	1	0	1	0	6	6	#NULL!	#NULL!	#NULL!	3	#NULL!	3	3
2	31	3	2	4	3	3	1	1	1	1	6	1	2	6	3	3	2	3	3	3	3	3	1	0	0	0	0	0	0	0	0	0	1	1	0	1	1	0	0	0	6	6	6	#NULL!	6	5	#NULL!	4	4
2	33	7	4	1	2	1	1	3	1	1	1	4	2	1	3	2	2	3	3	3	3	3	1	0	0	0	0	0	0	0	0	0	0	1	0	3	0	1	0	1	4	6	6	6	3	5	6	4	2
1	35	2	2	4	1	1	1	2	6	6	2	2	2	6	2	2	3	2	3	3	2	1	0	0	0	0	0	0	0	0	0	0	0	1	1	1	1	0	1	1	5	#NULL!	#NULL!	5	5	5	#NULL!	2	2
1	35	3	2	4	1	1	1	1	2	3	6	6	5	6	2	2	2	3	2	2	2	2	0	0	0	0	0	0	0	0	0	0	0	1	1	1	1	0	1	1	6	5	4	#NULL!	#NULL!	2	#NULL!	2	2
2	32	3	2	4	3	3	1	5	2	1	6	2	2	2	3	3	3	3	3	2	3	3	0	0	0	0	0	0	0	0	0	0	0	2	0	1	1	0	0	0	2	5	6	#NULL!	5	5	5	4	4
1	18	5	1	2	1	4	1	6	1	1	6	4	3	6	3	3	3	3	2	2	3	1	0	0	0	0	0	0	0	0	0	0	0	2	1	2	0	1	1	0	#NULL!	6	6	#NULL!	3	4	#NULL!	4	4
2	22	3	2	4	3	3	1	5	3	1	6	6	3	6	3	3	3	3	3	3	3	3	0	0	0	0	0	0	0	0	1	0	0	2	0	1	1	0	0	0	2	4	6	#NULL!	#NULL!	4	#NULL!	4	4
2	27	7	2	2	1	3	1	6	6	6	6	6	6	6	3	3	4	3	3	3	3	3	0	0	0	0	0	0	0	0	1	0	0	2	0	3	1	1	1	0	#NULL!	#NULL!	#NULL!	#NULL!	#NULL!	#NULL!	#NULL!	4	4
2	31	7	2	4	1	2	1	6	1	1	2	2	2	6	4	3	3	3	3	3	3	3	1	0	0	0	0	0	0	0	0	0	0	2	0	3	1	0	1	1	#NULL!	6	6	5	5	5	#NULL!	5	4
2	22	7	1	1	1	3	1	4	4	1	6	6	2	5	4	3	3	3	3	2	3	2	0	0	0	0	0	0	0	0	1	0	0	2	0	3	0	1	1	0	3	3	6	#NULL!	#NULL!	5	2	5	4
1	35	3	1	4	1	3	1	3	1	4	6	6	5	6	3	4	4	4	4	4	4	4	0	0	0	0	0	0	0	1	0	0	0	2	1	1	0	0	1	0	4	6	3	#NULL!	#NULL!	2	#NULL!	4	5
1	25	8	1	2	1	1	1	2	2	1	6	3	1	6	4	3	2	3	3	2	3	2	1	0	0	0	0	0	0	0	0	0	0	2	1	3	0	1	1	1	5	5	6	#NULL!	4	6	#NULL!	5	4
2	30	3	2	4	1	3	1	2	1	1	6	6	6	6	3	2	2	-1	2	3	2	1	1	0	0	0	0	0	0	0	0	0	0	1	0	1	1	0	1	0	5	6	6	#NULL!	#NULL!	#NULL!	#NULL!	4	2
2	35	8	2	4	2	1	1	1	1	1	1	1	1	5	4	4	4	3	3	3	3	3	1	0	0	1	0	0	0	0	1	0	0	2	0	3	1	0	0	1	6	6	6	6	6	6	2	5	5
1	30	4	2	4	1	1	1	3	6	2	1	4	6	6	3	3	3	3	3	2	3	3	0	0	0	0	0	0	0	0	0	0	0	1	1	2	1	0	1	1	4	#NULL!	5	6	3	#NULL!	#NULL!	4	4
2	32	3	2	4	1	3	1	1	3	1	6	1	2	6	2	-1	-1	3	2	2	3	2	0	0	0	0	0	0	0	0	0	0	0	2	0	1	1	0	1	0	6	4	6	#NULL!	6	5	#NULL!	2	3
2	31	8	2	4	1	1	1	1	1	1	6	6	2	5	3	3	3	2	2	2	2	2	0	0	0	0	0	0	0	1	1	0	0	1	0	3	1	0	1	1	6	6	6	#NULL!	#NULL!	5	2	4	4
1	27	5	2	4	1	1	1	6	2	2	6	6	4	6	2	2	3	3	2	2	2	2	0	0	0	0	0	0	0	0	0	0	0	1	1	2	1	0	1	1	#NULL!	5	5	#NULL!	#NULL!	3	#NULL!	2	2
2	31	4	2	4	3	1	1	6	1	1	6	6	3	6	4	3	3	3	2	2	2	2	0	0	1	0	0	0	0	1	0	0	0	1	0	2	1	0	0	1	#NULL!	6	6	#NULL!	#NULL!	4	#NULL!	5	4
2	29	3	2	4	3	3	1	5	3	1	6	2	3	6	3	3	4	4	3	3	3	3	0	0	0	0	0	0	0	1	1	0	0	2	0	1	1	0	0	0	2	4	6	#NULL!	5	4	#NULL!	4	4
1	34	3	2	4	1	1	1	2	2	2	6	6	6	6	4	4	4	4	4	3	3	3	0	0	0	0	0	0	0	0	0	0	0	2	1	1	1	0	1	1	5	5	5	#NULL!	#NULL!	#NULL!	#NULL!	5	5
2	32	8	2	4	3	1	1	2	1	1	6	1	2	6	4	3	4	3	3	2	3	3	0	0	0	0	0	0	0	0	0	0	0	2	0	3	1	0	0	1	5	6	6	#NULL!	6	5	#NULL!	5	4
2	30	3	2	4	1	3	1	4	1	1	6	3	4	6	3	-1	-1	3	2	2	-1	2	0	0	0	0	0	0	0	0	0	0	0	2	0	1	1	0	1	0	3	6	6	#NULL!	4	3	#NULL!	4	3
2	33	3	2	4	3	3	1	3	2	2	3	2	2	6	2	2	3	2	2	2	2	2	0	1	0	0	0	0	0	0	0	0	0	2	0	1	1	0	0	0	4	5	5	4	5	5	#NULL!	2	2
1	19	8	1	2	3	4	1	1	1	1	6	1	4	6	3	3	3	4	3	2	4	3	0	0	0	0	0	0	0	0	0	0	0	2	1	3	0	1	0	0	6	6	6	#NULL!	6	3	#NULL!	4	4
1	21	8	1	4	1	4	1	5	1	1	5	5	5	5	4	4	4	4	3	3	4	3	0	0	0	0	0	0	0	0	0	0	0	2	1	3	0	0	1	0	2	6	6	2	2	2	2	5	5
2	30	8	1	4	3	3	1	2	2	1	6	5	2	6	3	3	3	3	3	3	3	3	0	0	0	0	0	0	0	0	0	0	0	2	0	3	0	0	0	0	5	5	6	#NULL!	2	5	#NULL!	4	4
2	30	3	2	4	1	3	1	2	2	1	6	2	3	6	1	2	2	2	2	2	2	2	0	0	0	0	0	0	0	0	0	0	0	2	0	1	1	0	1	0	5	5	6	#NULL!	5	4	#NULL!	1	2
1	35	4	2	4	1	1	1	1	2	2	6	4	1	6	3	3	3	3	3	3	3	3	0	0	0	0	0	0	0	0	0	0	0	1	1	2	1	0	1	1	6	5	5	#NULL!	3	6	#NULL!	4	4
2	33	3	2	4	3	3	1	5	3	2	6	4	3	6	3	2	2	3	3	3	3	3	1	0	0	0	0	0	0	0	0	0	0	2	0	1	1	0	0	0	2	4	5	#NULL!	3	4	#NULL!	4	2
2	26	5	2	4	1	1	1	2	5	1	6	6	3	6	4	3	-1	-1	-1	4	3	4	0	0	0	0	0	0	0	0	0	0	0	2	0	2	1	0	1	1	5	2	6	#NULL!	#NULL!	4	#NULL!	5	4
1	35	7	2	1	1	1	1	2	3	6	2	2	4	6	3	3	3	3	3	3	3	3	0	0	0	0	0	0	0	1	1	0	0	1	1	3	1	1	1	1	5	4	#NULL!	5	5	3	#NULL!	4	4
2	34	3	2	4	1	3	1	4	3	1	6	6	4	6	4	4	4	4	4	4	4	2	0	0	0	0	0	0	0	0	0	0	0	2	0	1	1	0	1	0	3	4	6	#NULL!	#NULL!	3	#NULL!	5	5
2	35	4	2	4	1	1	1	1	1	1	1	2	1	5	4	3	2	3	3	3	3	2	0	0	0	0	0	0	0	0	0	0	0	2	0	2	1	0	1	1	6	6	6	6	5	6	2	5	4
1	24	9	1	1	3	2	1	2	2	1	2	2	3	3	2	3	3	2	2	2	3	3	0	1	0	0	0	0	0	0	0	0	0	2	1	3	0	1	0	1	5	5	6	5	5	4	4	2	4
1	31	6	1	4	1	1	1	2	2	1	3	5	3	6	2	3	3	3	2	2	2	2	1	1	0	0	0	0	0	1	0	0	0	2	1	2	0	0	1	1	5	5	6	4	2	4	#NULL!	2	4
2	29	8	2	4	3	3	1	1	1	1	2	1	1	3	3	2	3	3	3	3	3	4	1	0	0	0	0	0	0	0	0	0	0	2	0	3	1	0	0	0	6	6	6	5	6	6	4	4	2
1	29	3	2	4	1	1	1	1	1	1	1	6	4	6	4	4	4	1	4	1	4	1	0	0	0	0	0	0	0	0	0	0	0	2	1	1	1	0	1	1	6	6	6	6	#NULL!	3	#NULL!	5	5
1	20	8	1	2	1	4	1	2	1	1	1	1	3	5	4	3	3	3	2	2	2	2	1	0	0	0	0	0	0	0	0	0	0	1	1	3	0	1	1	0	5	6	6	6	6	4	2	5	4
2	35	5	2	2	2	3	1	1	1	1	6	2	4	6	3	3	3	3	3	3	3	3	0	0	0	0	0	0	0	0	0	0	0	1	0	2	1	1	0	0	6	6	6	#NULL!	5	3	#NULL!	4	4
2	31	3	3	4	1	3	1	5	1	1	6	6	4	6	2	3	3	3	3	3	3	2	0	0	0	0	0	0	0	0	0	0	0	2	0	1	1	0	1	0	2	6	6	#NULL!	#NULL!	3	#NULL!	2	4
2	25	3	2	4	1	3	1	5	3	4	6	5	5	6	4	3	2	4	4	2	4	2	0	0	0	0	0	0	0	0	0	0	0	2	0	1	1	0	1	0	2	4	3	#NULL!	2	2	#NULL!	5	4
2	35	3	2	4	1	2	1	3	3	2	6	6	4	6	2	3	3	3	3	3	3	3	0	0	0	0	0	0	0	0	0	0	0	2	0	1	1	0	1	1	4	4	5	#NULL!	#NULL!	3	#NULL!	2	4
2	30	3	2	4	1	1	1	3	1	1	6	3	2	6	3	3	3	2	3	3	3	2	0	0	0	0	0	0	0	0	0	0	0	1	0	1	1	0	1	1	4	6	6	#NULL!	4	5	#NULL!	4	4
2	34	5	2	4	3	3	1	2	1	3	6	6	4	6	3	3	3	3	3	-1	-1	2	0	0	0	0	0	0	0	0	0	0	0	2	0	2	1	0	0	0	5	6	4	#NULL!	#NULL!	3	#NULL!	4	4
2	31	3	2	4	3	1	1	6	1	1	6	2	3	6	2	2	2	2	2	2	2	2	0	0	0	0	0	0	0	0	0	0	0	2	0	1	1	0	0	1	#NULL!	6	6	#NULL!	5	4	#NULL!	2	2
2	28	7	2	4	1	1	1	2	2	1	1	6	3	6	3	3	2	3	2	2	2	2	0	0	0	0	0	0	0	0	0	0	0	1	0	3	1	0	1	1	5	5	6	6	#NULL!	4	#NULL!	4	4
1	35	3	2	1	1	2	1	1	6	1	6	2	5	6	3	4	4	4	4	4	4	4	0	0	0	1	0	1	0	0	1	0	0	1	1	1	1	1	1	1	6	#NULL!	6	#NULL!	5	2	#NULL!	4	5
1	27	7	2	2	1	1	1	2	2	1	6	2	4	6	4	4	4	4	4	4	4	4	0	0	0	0	0	0	0	0	0	0	0	1	1	3	1	1	1	1	5	5	6	#NULL!	5	3	#NULL!	5	5
2	33	3	2	4	1	3	1	2	3	2	6	3	2	6	3	3	3	3	3	3	3	3	0	0	0	0	0	0	0	0	0	0	0	2	0	1	1	0	1	0	5	4	5	#NULL!	4	5	#NULL!	4	4
1	21	7	1	2	1	4	1	1	1	1	5	2	2	5	4	4	4	4	4	4	4	3	1	0	1	0	1	0	0	0	0	0	0	1	1	3	0	1	1	0	6	6	6	2	5	5	2	5	5
1	32	5	2	4	1	1	1	1	2	2	2	4	2	5	2	2	2	2	3	2	2	2	1	0	0	0	0	0	0	0	0	0	0	2	1	2	1	0	1	1	6	5	5	5	3	5	2	2	2
2	34	2	2	4	1	3	1	2	1	1	6	6	2	6	3	3	3	-1	3	3	3	3	0	0	0	0	0	0	0	0	0	0	0	2	0	1	1	0	1	0	5	6	6	#NULL!	#NULL!	5	#NULL!	4	4
1	23	8	1	2	1	3	1	2	3	1	1	1	4	6	3	3	3	3	3	3	3	3	0	0	0	0	0	0	0	0	0	0	0	2	1	3	0	1	1	0	5	4	6	6	6	3	#NULL!	4	4
1	33	7	2	1	3	1	1	1	3	2	1	1	6	6	4	3	3	3	2	3	1	4	0	0	1	0	0	0	1	1	1	0	0	1	1	3	1	1	0	1	6	4	5	6	6	#NULL!	#NULL!	5	4
2	28	3	2	4	3	1	1	2	1	2	6	1	1	6	4	-1	-1	-1	2	-1	-1	1	0	0	0	0	0	0	0	0	1	0	0	1	0	1	1	0	0	1	5	6	5	#NULL!	6	6	#NULL!	5	3
1	34	3	2	4	1	2	1	3	1	1	6	3	2	6	2	2	3	3	3	3	3	2	0	0	0	0	0	0	0	0	0	0	0	1	1	1	1	0	1	1	4	6	6	#NULL!	4	5	#NULL!	2	2
1	26	7	2	4	2	1	1	2	1	1	6	6	1	4	3	3	3	3	3	2	3	2	1	0	0	0	0	0	0	0	0	0	0	2	1	3	1	0	0	1	5	6	6	#NULL!	#NULL!	6	3	4	4
1	19	4	1	2	2	3	1	3	2	1	6	1	4	6	2	3	4	4	3	2	1	1	1	0	0	0	0	0	0	1	1	0	0	2	1	2	0	1	0	0	4	5	6	#NULL!	6	3	#NULL!	2	4
2	35	8	2	4	3	1	1	3	1	2	6	6	3	6	1	3	3	2	2	3	3	3	0	0	0	0	0	0	0	0	0	0	0	2	0	3	1	0	0	1	4	6	5	#NULL!	#NULL!	4	#NULL!	1	4
2	33	4	4	4	1	1	1	2	2	1	1	1	1	6	4	3	3	3	3	3	3	2	0	0	0	0	0	0	0	0	0	0	0	1	0	2	0	0	1	1	5	5	6	6	6	6	#NULL!	5	4
2	30	3	2	4	2	3	1	2	1	1	6	1	2	6	3	3	3	3	3	2	2	2	0	0	0	0	0	0	0	0	0	0	0	2	0	1	1	0	0	0	5	6	6	#NULL!	6	5	#NULL!	4	4
2	26	8	2	4	3	2	1	1	1	1	5	2	2	1	4	4	4	4	4	3	3	3	0	0	0	0	0	0	0	0	0	0	0	2	0	3	1	0	0	1	6	6	6	2	5	5	6	5	5
2	18	7	1	2	1	4	1	1	1	1	6	2	3	6	3	3	3	4	3	3	3	3	0	1	0	0	0	0	0	0	0	0	1	2	0	3	0	1	1	0	6	6	6	#NULL!	5	4	#NULL!	4	4
2	32	7	2	4	1	3	1	1	1	1	6	1	1	6	3	3	3	3	3	3	3	3	0	0	0	0	0	0	0	0	0	0	0	2	0	3	1	0	1	0	6	6	6	#NULL!	6	6	#NULL!	4	4
2	34	3	2	4	1	1	1	3	2	2	3	4	2	6	3	3	3	3	2	2	3	2	0	0	0	0	0	0	0	0	0	0	0	1	0	1	1	0	1	1	4	5	5	4	3	5	#NULL!	4	4
2	33	8	2	4	1	1	1	2	1	1	1	4	3	6	4	4	3	3	3	3	3	3	0	0	0	0	0	0	0	0	0	0	0	2	0	3	1	0	1	1	5	6	6	6	3	4	#NULL!	5	5
2	20	8	1	4	1	4	1	1	1	1	4	1	2	6	3	4	4	3	2	3	4	4	0	0	0	0	0	0	0	0	0	0	0	2	0	3	0	0	1	0	6	6	6	3	6	5	#NULL!	4	5
2	24	8	1	2	1	1	1	1	1	1	1	1	3	1	3	1	2	3	3	1	1	1	1	1	0	0	1	0	0	0	1	0	0	2	0	3	0	1	1	1	6	6	6	6	6	4	6	4	1
2	31	5	2	4	1	3	1	3	3	2	4	2	2	6	3	2	3	3	3	2	2	2	0	0	0	0	0	0	0	0	0	0	0	2	0	2	1	0	1	0	4	4	5	3	5	5	#NULL!	4	2
1	29	3	2	4	3	1	1	1	1	6	6	6	3	6	2	2	3	3	2	2	3	2	0	0	0	0	0	0	0	1	0	0	0	2	1	1	1	0	0	1	6	6	#NULL!	#NULL!	#NULL!	4	#NULL!	2	2
2	22	7	6	4	1	2	1	3	3	1	1	6	1	6	4	4	4	4	4	4	4	4	0	0	0	0	0	0	0	0	0	0	0	2	0	3	1	0	1	1	4	4	6	6	#NULL!	6	#NULL!	5	5
2	31	7	2	4	3	1	1	5	3	1	5	5	3	5	3	3	3	3	3	2	3	3	0	0	0	0	0	0	0	0	0	0	0	2	0	3	1	0	0	1	2	4	6	2	2	4	2	4	4
1	35	7	2	4	2	1	1	3	1	1	6	6	4	6	3	3	3	2	2	2	2	2	0	0	1	0	0	0	0	0	0	0	0	2	1	3	1	0	0	1	4	6	6	#NULL!	#NULL!	3	#NULL!	4	4
1	21	8	1	1	3	4	1	3	1	1	3	1	3	6	4	3	4	3	3	3	3	2	1	0	0	1	0	0	0	0	1	0	0	2	1	3	0	1	0	0	4	6	6	4	6	4	#NULL!	5	4
2	26	5	2	4	1	3	1	3	1	1	6	6	4	6	4	3	3	2	3	3	2	2	0	0	0	0	0	0	0	0	0	0	0	2	0	2	1	0	1	0	4	6	6	#NULL!	#NULL!	3	#NULL!	5	4
2	20	8	1	2	3	4	1	3	1	1	6	1	1	6	3	3	3	3	3	3	3	2	0	0	0	0	0	0	0	0	0	0	0	2	0	3	0	1	0	0	4	6	6	#NULL!	6	6	#NULL!	4	4
1	30	5	1	4	1	1	1	4	3	1	3	5	2	6	3	2	1	3	3	2	2	2	0	0	0	0	0	0	0	0	0	0	0	2	1	2	0	0	1	1	3	4	6	4	2	5	#NULL!	4	2
2	21	8	1	2	3	4	1	3	1	1	4	3	4	5	3	4	4	4	3	3	3	3	0	0	0	0	0	0	0	0	0	0	0	2	0	3	0	1	0	0	4	6	6	3	4	3	2	4	5
1	27	7	1	4	1	1	1	1	3	1	6	1	1	6	4	4	4	4	4	4	4	4	1	0	0	0	0	0	0	0	0	0	0	1	1	3	0	0	1	1	6	4	6	#NULL!	6	6	#NULL!	5	5
2	30	7	2	4	1	1	1	1	1	1	1	1	1	6	3	3	3	3	3	3	3	3	0	0	0	0	0	0	0	0	0	0	0	2	0	3	1	0	1	1	6	6	6	6	6	6	#NULL!	4	4
2	29	3	2	4	1	3	1	2	1	1	6	1	2	6	4	4	4	4	4	4	4	4	0	0	0	0	0	0	0	0	0	0	0	2	0	1	1	0	1	0	5	6	6	#NULL!	6	5	#NULL!	5	5
1	19	4	1	2	3	4	1	1	1	1	6	1	3	6	3	3	4	3	2	2	3	2	0	0	0	0	0	0	0	0	0	0	0	2	1	2	0	1	0	0	6	6	6	#NULL!	6	4	#NULL!	4	4
2	29	4	1	4	1	3	1	2	2	2	2	2	2	6	3	3	3	3	3	3	3	3	0	0	0	0	0	0	0	0	0	0	0	2	0	2	0	0	1	0	5	5	5	5	5	5	#NULL!	4	4
2	33	3	3	4	1	3	1	2	1	1	6	1	1	6	3	3	3	3	3	3	3	3	0	0	0	0	0	0	0	0	0	0	0	1	0	1	1	0	1	0	5	6	6	#NULL!	6	6	#NULL!	4	4
1	33	3	2	4	1	1	1	2	1	1	1	4	2	6	3	2	3	1	3	1	2	1	0	0	1	0	0	0	0	0	0	0	0	2	1	1	1	0	1	1	5	6	6	6	3	5	#NULL!	4	2
2	34	3	2	4	1	3	1	1	1	5	6	5	3	6	2	2	3	3	2	2	3	3	0	1	1	0	0	0	0	0	1	0	0	1	0	1	1	0	1	0	6	6	2	#NULL!	2	4	#NULL!	2	2
1	30	4	2	4	1	1	1	3	3	6	2	4	5	6	4	4	4	4	4	3	4	4	0	0	0	0	0	0	0	0	0	0	0	1	1	2	1	0	1	1	4	4	#NULL!	5	3	2	#NULL!	5	5
2	26	8	2	4	2	1	1	2	1	1	1	3	2	4	4	4	4	4	4	4	4	4	0	0	0	0	0	0	0	0	0	0	0	2	0	3	1	0	0	1	5	6	6	6	4	5	3	5	5
2	27	7	2	2	1	1	1	6	1	1	2	3	3	6	3	3	3	3	3	4	3	3	0	0	0	0	0	0	0	0	0	0	1	2	0	3	1	1	1	1	#NULL!	6	6	5	4	4	#NULL!	4	4
2	31	5	2	4	1	1	1	4	2	1	1	6	3	6	3	2	2	3	3	2	3	2	0	0	0	0	0	0	0	0	0	0	0	2	0	2	1	0	1	1	3	5	6	6	#NULL!	4	#NULL!	4	2
1	33	7	2	4	3	1	1	5	1	1	6	6	1	6	4	3	4	3	3	3	3	3	0	0	0	0	0	0	0	0	0	0	0	2	1	3	1	0	0	1	2	6	6	#NULL!	#NULL!	6	#NULL!	5	4
2	34	3	2	4	1	1	1	3	1	1	6	6	5	6	3	4	3	3	3	3	3	2	0	0	0	0	0	0	0	0	0	0	0	1	0	1	1	0	1	1	4	6	6	#NULL!	#NULL!	2	#NULL!	4	5
2	30	8	2	4	2	2	1	2	1	1	1	2	2	4	3	3	3	3	3	3	3	3	0	0	0	0	0	0	0	0	1	0	0	2	0	3	1	0	0	1	5	6	6	6	5	5	3	4	4
1	31	8	1	4	2	1	1	3	2	1	6	6	4	4	4	3	4	3	3	3	3	3	0	0	0	0	0	0	0	0	0	0	0	2	1	3	0	0	0	1	4	5	6	#NULL!	#NULL!	3	3	5	4
1	25	3	1	4	1	2	1	3	5	1	6	6	2	6	3	4	4	2	1	3	3	3	0	0	0	0	0	0	0	0	0	0	0	2	1	1	0	0	1	1	4	2	6	#NULL!	#NULL!	5	#NULL!	4	5
1	18	4	1	2	2	4	1	1	1	2	6	1	1	6	4	3	3	3	2	3	3	3	1	0	0	0	0	0	0	0	1	0	0	2	1	2	0	1	0	0	6	6	5	#NULL!	6	6	#NULL!	5	4
1	20	5	1	2	1	3	1	1	1	1	1	1	1	1	3	3	3	3	3	3	3	3	0	0	0	0	0	0	0	0	0	0	0	2	1	2	0	1	1	0	6	6	6	6	6	6	6	4	4
1	19	8	1	2	2	4	1	2	1	1	6	2	3	6	3	3	3	3	2	2	3	2	1	0	0	0	0	0	0	0	0	0	0	2	1	3	0	1	0	0	5	6	6	#NULL!	5	4	#NULL!	4	4
1	31	7	2	1	1	1	1	1	3	1	1	1	3	5	4	3	3	3	3	2	2	2	1	0	1	0	0	1	0	1	0	0	0	1	1	3	1	1	1	1	6	4	6	6	6	4	2	5	4
2	32	3	2	4	1	3	1	3	1	1	6	6	4	6	2	-1	-1	-1	-1	-1	3	2	0	0	0	0	0	0	0	0	0	0	0	1	0	1	1	0	1	0	4	6	6	#NULL!	#NULL!	3	#NULL!	2	3
1	20	8	1	2	1	4	1	2	1	1	4	2	3	5	3	3	3	3	3	2	3	3	1	0	0	0	0	0	0	0	0	0	0	2	1	3	0	1	1	0	5	6	6	3	5	4	2	4	4
2	32	3	2	4	1	3	1	6	1	1	6	6	3	6	3	3	3	3	3	3	3	3	0	0	0	0	0	0	0	0	0	0	0	1	0	1	1	0	1	0	#NULL!	6	6	#NULL!	#NULL!	4	#NULL!	4	4
2	32	3	2	4	1	3	1	6	2	2	6	6	6	6	3	3	3	3	3	3	3	3	0	0	0	0	0	0	0	0	0	0	0	1	0	1	1	0	1	0	#NULL!	5	5	#NULL!	#NULL!	#NULL!	#NULL!	4	4
1	26	3	4	4	1	1	1	1	1	1	1	6	4	6	-1	-1	3	3	1	1	3	-1	0	0	0	0	0	0	0	0	0	0	0	2	1	1	0	0	1	1	6	6	6	6	#NULL!	3	#NULL!	3	3
2	27	4	2	2	1	3	1	1	1	1	6	1	3	6	3	1	3	3	3	3	3	4	0	0	0	0	0	0	0	0	0	0	0	1	0	2	1	1	1	0	6	6	6	#NULL!	6	4	#NULL!	4	1
2	28	3	2	4	1	3	1	3	2	1	6	2	3	2	3	3	3	3	3	3	3	3	0	0	0	0	0	0	0	0	0	0	0	2	0	1	1	0	1	0	4	5	6	#NULL!	5	4	5	4	4
2	29	8	2	4	2	1	1	3	1	1	1	3	3	5	3	3	3	3	3	2	3	3	0	0	0	0	0	0	0	0	0	0	0	2	0	3	1	0	0	1	4	6	6	6	4	4	2	4	4
1	21	8	1	2	2	4	1	2	2	1	6	3	2	6	3	3	3	3	2	3	3	3	0	0	0	0	0	0	0	0	0	0	0	2	1	3	0	1	0	0	5	5	6	#NULL!	4	5	#NULL!	4	4
1	34	7	2	4	1	3	1	4	1	1	4	6	2	6	3	2	2	2	2	3	2	3	0	0	0	0	0	0	0	0	0	0	0	2	1	3	1	0	1	0	3	6	6	3	#NULL!	5	#NULL!	4	2
2	29	8	2	1	1	1	1	1	1	1	1	5	4	5	3	3	3	3	3	3	2	3	0	0	0	0	1	0	0	0	1	0	0	1	0	3	1	1	1	1	6	6	6	6	2	3	2	4	4
2	23	8	1	2	2	3	1	1	1	1	6	6	1	6	3	3	3	3	3	3	3	3	0	0	0	0	0	0	0	0	0	0	0	2	0	3	0	1	0	0	6	6	6	#NULL!	#NULL!	6	#NULL!	4	4
1	21	8	1	2	2	4	1	1	1	1	6	2	2	6	3	3	3	3	2	2	3	2	1	0	0	0	0	0	0	0	1	0	0	2	1	3	0	1	0	0	6	6	6	#NULL!	5	5	#NULL!	4	4
1	30	8	2	4	1	1	1	1	2	1	1	5	4	6	4	4	4	4	3	3	4	4	0	0	0	0	0	0	0	0	0	0	0	2	1	3	1	0	1	1	6	5	6	6	2	3	#NULL!	5	5
2	25	8	1	2	3	1	1	1	1	1	1	2	2	4	3	3	3	3	2	3	3	2	1	1	1	0	0	0	0	0	0	0	1	2	0	3	0	1	0	1	6	6	6	6	5	5	3	4	4
2	33	9	2	1	1	2	1	1	1	1	1	1	1	6	3	3	3	3	2	2	3	2	1	0	0	0	0	0	0	0	0	0	0	2	0	3	1	1	1	1	6	6	6	6	6	6	#NULL!	4	4
1	18	4	1	4	1	4	1	5	2	1	6	3	3	6	4	3	3	3	3	2	3	3	1	0	0	0	0	0	0	0	0	0	0	2	1	2	0	0	1	0	2	5	6	#NULL!	4	4	#NULL!	5	4
2	30	5	2	4	1	1	1	2	1	2	6	2	3	6	2	3	3	3	3	3	3	3	0	0	0	0	0	1	0	0	0	0	0	1	0	2	1	0	1	1	5	6	5	#NULL!	5	4	#NULL!	2	4
2	23	7	1	2	1	1	1	6	1	1	1	1	1	6	3	3	3	3	3	3	3	3	0	0	0	0	0	0	0	0	0	0	0	2	0	3	0	1	1	1	#NULL!	6	6	6	6	6	#NULL!	4	4
1	32	6	2	4	1	2	1	1	1	1	6	6	5	6	4	4	3	3	2	2	3	3	0	0	0	0	0	0	0	1	0	0	0	1	1	2	1	0	1	1	6	6	6	#NULL!	#NULL!	2	#NULL!	5	5
1	30	3	1	4	3	2	1	3	1	1	1	6	4	4	1	2	2	-1	3	3	3	4	0	0	0	0	0	0	0	0	0	0	0	2	1	1	0	0	0	1	4	6	6	6	#NULL!	3	3	1	2
1	30	3	1	4	1	1	1	1	1	6	6	1	6	6	3	3	3	3	3	3	3	3	0	0	1	0	1	0	0	0	0	0	0	1	1	1	0	0	1	1	6	6	#NULL!	#NULL!	6	#NULL!	#NULL!	4	4
1	29	3	5	4	3	2	1	1	1	2	6	2	1	6	4	3	4	3	3	3	3	3	1	0	0	0	0	0	0	0	0	0	0	2	1	1	0	0	0	1	6	6	5	#NULL!	5	6	#NULL!	5	4
1	33	3	2	4	1	3	1	1	1	1	6	6	1	6	4	3	3	3	1	1	3	1	0	0	0	0	0	0	0	0	0	0	0	2	1	1	1	0	1	0	6	6	6	#NULL!	#NULL!	6	#NULL!	5	4
1	24	3	2	4	1	1	1	5	5	1	1	6	6	6	3	2	2	3	3	3	2	2	0	0	0	0	0	0	0	0	0	0	0	2	1	1	1	0	1	1	2	2	6	6	#NULL!	#NULL!	#NULL!	4	2
2	19	6	1	4	3	1	1	3	1	2	2	1	2	6	3	3	3	3	4	3	3	2	0	0	0	0	0	0	0	0	0	0	0	2	0	2	0	0	0	1	4	6	5	5	6	5	#NULL!	4	4
1	35	2	2	4	1	2	1	1	1	2	6	1	2	6	4	4	4	3	3	2	3	2	0	0	1	0	0	0	1	0	0	0	0	2	1	1	1	0	1	1	6	6	5	#NULL!	6	5	#NULL!	5	5
1	28	4	2	4	1	1	1	2	2	2	2	2	2	2	2	2	2	2	2	2	2	2	0	0	0	0	0	0	0	0	0	0	0	2	1	2	1	0	1	1	5	5	5	5	5	5	5	2	2
2	20	7	1	4	1	4	1	2	1	1	1	2	2	4	3	3	3	3	2	2	3	3	0	0	0	0	0	0	0	0	0	0	0	2	0	3	0	0	1	0	5	6	6	6	5	5	3	4	4
1	34	4	2	1	1	1	1	1	6	3	6	6	6	6	3	3	3	3	3	3	3	3	0	0	0	0	0	0	0	0	0	0	0	2	1	2	1	1	1	1	6	#NULL!	4	#NULL!	#NULL!	#NULL!	#NULL!	4	4
1	27	7	2	2	2	1	1	1	1	1	1	1	1	1	4	4	4	4	4	4	4	4	0	0	0	0	0	0	0	0	0	0	0	1	1	3	1	1	0	1	6	6	6	6	6	6	6	5	5
2	22	8	1	2	1	1	1	3	1	1	1	4	3	4	3	3	3	3	3	3	3	3	1	0	0	0	0	0	0	0	0	0	0	2	0	3	0	1	1	1	4	6	6	6	3	4	3	4	4
2	34	3	2	4	1	1	1	6	1	6	6	6	6	6	3	3	3	2	3	2	2	3	0	0	0	0	0	0	0	0	0	0	0	2	0	1	1	0	1	1	#NULL!	6	#NULL!	#NULL!	#NULL!	#NULL!	#NULL!	4	4
1	31	7	2	1	1	3	1	1	1	1	6	4	2	2	4	4	4	3	3	3	4	4	0	0	0	0	0	0	0	1	1	0	0	1	1	3	1	1	1	0	6	6	6	#NULL!	3	5	5	5	5
1	33	4	2	4	1	1	1	2	1	1	6	6	3	6	3	3	3	3	3	3	3	2	0	0	0	0	0	0	0	0	0	0	0	1	1	2	1	0	1	1	5	6	6	#NULL!	#NULL!	4	#NULL!	4	4
1	31	3	2	4	1	1	1	3	2	1	6	2	5	6	4	4	4	4	4	4	4	4	0	0	0	0	0	0	0	0	0	0	0	1	1	1	1	0	1	1	4	5	6	#NULL!	5	2	#NULL!	5	5
2	26	9	1	1	1	1	1	1	1	1	6	1	1	6	4	4	4	4	4	4	4	4	0	0	0	0	0	0	0	0	0	0	0	2	0	3	0	1	1	1	6	6	6	#NULL!	6	6	#NULL!	5	5
2	28	3	2	4	4	3	1	3	1	2	6	6	1	6	2	2	3	2	2	2	2	2	0	0	0	0	0	0	0	0	0	0	0	2	0	1	1	0	0	0	4	6	5	#NULL!	#NULL!	6	#NULL!	2	2
2	21	8	1	1	1	3	1	1	1	1	6	1	2	6	3	3	3	2	3	3	3	3	1	1	0	0	0	0	0	0	1	0	0	1	0	3	0	1	1	0	6	6	6	#NULL!	6	5	#NULL!	4	4
1	34	5	1	4	1	2	1	5	2	2	6	6	2	6	-1	3	3	3	2	3	3	3	0	0	0	0	0	0	0	0	0	0	0	1	1	2	0	0	1	1	2	5	5	#NULL!	#NULL!	5	#NULL!	3	4
2	19	7	1	2	1	4	1	1	1	1	6	2	2	6	4	4	4	3	2	2	3	3	1	0	0	0	0	0	0	0	0	0	0	2	0	3	0	1	1	0	6	6	6	#NULL!	5	5	#NULL!	5	5
1	21	5	1	4	3	3	1	3	2	2	5	5	5	6	3	3	3	3	3	3	3	3	0	0	0	0	1	0	0	0	0	0	0	2	1	2	0	0	0	0	4	5	5	2	2	2	#NULL!	4	4
2	31	3	2	4	1	3	1	4	3	2	6	6	3	6	3	3	3	3	2	2	1	1	0	0	0	0	0	0	0	0	0	0	0	1	0	1	1	0	1	0	3	4	5	#NULL!	#NULL!	4	#NULL!	4	4
2	35	2	2	4	1	3	1	1	6	5	6	6	5	6	-1	3	-1	-1	-1	-1	-1	2	0	0	0	0	0	0	0	0	0	0	0	2	0	1	1	0	1	0	6	#NULL!	2	#NULL!	#NULL!	2	#NULL!	3	4
2	23	4	2	4	3	3	1	2	2	2	2	6	3	6	1	3	3	2	2	3	3	2	0	0	0	0	0	0	0	0	0	0	0	2	0	2	1	0	0	0	5	5	5	5	#NULL!	4	#NULL!	1	4
2	34	4	4	4	1	1	1	4	1	2	6	5	3	6	3	2	-1	3	3	2	3	2	0	0	0	0	0	0	0	0	0	0	0	2	0	2	0	0	1	1	3	6	5	#NULL!	2	4	#NULL!	4	2
1	23	8	1	2	2	3	1	2	3	1	6	2	3	3	3	2	2	2	2	3	3	2	0	0	0	0	0	0	0	0	0	0	0	2	1	3	0	1	0	0	5	4	6	#NULL!	5	4	4	4	2
2	18	4	1	2	2	4	1	3	1	1	6	2	2	6	3	3	3	3	3	3	3	3	1	0	0	0	0	0	0	0	0	0	0	2	0	2	0	1	0	0	4	6	6	#NULL!	5	5	#NULL!	4	4
2	31	7	2	1	1	3	1	1	1	2	6	6	1	2	3	3	3	3	2	2	2	2	1	1	0	0	0	0	0	0	0	0	0	2	0	3	1	1	1	0	6	6	5	#NULL!	#NULL!	6	5	4	4
1	21	8	1	1	2	4	1	1	1	1	6	1	2	6	4	4	4	4	4	4	4	4	0	0	0	0	0	0	0	0	0	0	0	2	1	3	0	1	0	0	6	6	6	#NULL!	6	5	#NULL!	5	5
2	26	5	2	4	1	3	1	6	1	1	6	6	2	6	3	3	3	3	3	3	3	3	0	0	0	0	0	0	0	0	1	0	0	2	0	2	1	0	1	0	#NULL!	6	6	#NULL!	#NULL!	5	#NULL!	4	4
1	27	7	2	4	2	1	1	6	3	1	1	6	4	6	3	2	2	3	1	1	1	2	0	0	1	0	0	0	0	0	0	0	0	2	1	3	1	0	0	1	#NULL!	4	6	6	#NULL!	3	#NULL!	4	2
1	25	3	1	1	1	1	1	1	1	1	4	1	2	6	4	4	4	4	4	4	4	4	0	0	0	0	0	0	0	0	0	0	0	1	1	1	0	1	1	1	6	6	6	3	6	5	#NULL!	5	5
2	19	7	1	2	1	4	1	1	1	1	6	1	1	6	4	4	4	3	3	3	3	3	0	0	0	0	1	0	0	1	0	0	0	2	0	3	0	1	1	0	6	6	6	#NULL!	6	6	#NULL!	5	5
2	33	7	2	4	1	3	1	3	2	1	5	1	1	6	3	3	3	4	3	3	3	2	0	0	0	0	0	0	0	0	0	0	0	2	0	3	1	0	1	0	4	5	6	2	6	6	#NULL!	4	4
2	35	3	4	4	1	1	1	3	2	2	6	6	1	6	3	3	3	3	-1	-1	-1	-1	0	0	0	0	0	0	0	0	0	0	0	2	0	1	0	0	1	1	4	5	5	#NULL!	#NULL!	6	#NULL!	4	4
2	29	5	2	4	1	3	1	3	3	3	3	3	3	3	3	3	3	3	3	3	3	3	0	0	0	0	0	0	0	0	0	0	0	1	0	2	1	0	1	0	4	4	4	4	4	4	4	4	4
2	25	8	1	2	1	4	1	3	2	2	6	1	4	6	4	3	3	3	3	3	3	3	0	0	0	0	0	0	0	0	0	0	0	2	0	3	0	1	1	0	4	5	5	#NULL!	6	3	#NULL!	5	4
1	29	4	2	4	3	2	1	3	1	6	6	6	5	6	3	2	2	2	2	2	3	3	0	0	0	0	0	0	0	0	0	0	0	2	1	2	1	0	0	1	4	6	#NULL!	#NULL!	#NULL!	2	#NULL!	4	2
2	33	8	2	4	2	1	1	4	2	1	6	2	1	6	3	3	3	3	3	2	3	3	0	0	0	0	0	0	0	0	1	0	0	2	0	3	1	0	0	1	3	5	6	#NULL!	5	6	#NULL!	4	4
2	24	5	6	4	1	1	1	1	1	1	1	1	1	6	3	3	3	3	3	3	3	3	1	0	0	0	0	0	0	0	0	0	0	2	0	2	1	0	1	1	6	6	6	6	6	6	#NULL!	4	4
2	25	3	2	4	2	3	1	2	3	1	6	6	3	6	4	4	4	4	4	4	3	3	0	0	0	0	0	0	0	0	0	0	0	2	0	1	1	0	0	0	5	4	6	#NULL!	#NULL!	4	#NULL!	5	5
2	32	3	2	4	1	1	1	6	5	1	6	2	3	6	3	3	2	2	3	2	2	1	0	0	0	0	0	0	0	0	0	0	0	2	0	1	1	0	1	1	#NULL!	2	6	#NULL!	5	4	#NULL!	4	4
2	22	8	1	2	1	4	1	2	1	1	6	1	1	6	3	4	4	4	2	2	3	2	0	0	0	0	0	0	0	0	0	0	0	2	0	3	0	1	1	0	5	6	6	#NULL!	6	6	#NULL!	4	5
2	35	5	3	4	3	3	1	4	1	1	1	6	1	6	3	3	3	3	2	2	3	3	0	0	0	0	1	0	0	0	0	0	0	2	0	2	1	0	0	0	3	6	6	6	#NULL!	6	#NULL!	4	4
2	27	3	2	4	1	3	1	1	1	2	6	6	6	6	-1	-1	-1	-1	2	2	2	-1	0	0	0	0	0	0	0	0	0	0	0	1	0	1	1	0	1	0	6	6	5	#NULL!	#NULL!	#NULL!	#NULL!	3	3
1	25	6	1	2	1	1	1	1	1	1	6	1	1	6	3	3	3	3	3	3	3	3	1	0	0	0	0	0	0	0	0	0	0	1	1	2	0	1	1	1	6	6	6	#NULL!	6	6	#NULL!	4	4
1	21	8	1	2	1	4	1	1	1	1	2	1	3	6	4	4	3	3	3	3	3	3	0	1	0	0	0	0	0	0	0	0	0	1	1	3	0	1	1	0	6	6	6	5	6	4	#NULL!	5	5
2	19	8	1	4	4	4	1	1	1	1	6	3	2	6	2	3	3	3	-1	3	3	-1	1	0	0	0	0	0	0	0	0	0	0	2	0	3	0	0	0	0	6	6	6	#NULL!	4	5	#NULL!	2	4
2	27	2	2	4	1	3	1	5	2	2	6	6	2	6	-1	3	3	3	3	1	1	1	0	0	0	0	0	0	0	0	0	0	0	2	0	1	1	0	1	0	2	5	5	#NULL!	#NULL!	5	#NULL!	3	4
2	25	8	1	2	1	3	1	4	1	3	2	3	2	6	4	3	3	3	3	3	3	3	1	1	0	0	0	0	0	0	0	0	0	2	0	3	0	1	1	0	3	6	4	5	4	5	#NULL!	5	4
1	35	8	2	1	1	1	1	1	6	1	6	1	4	6	1	1	1	1	1	1	3	1	0	0	0	0	0	1	0	1	1	0	0	1	1	3	1	1	1	1	6	#NULL!	6	#NULL!	6	3	#NULL!	1	1
1	25	7	2	4	1	1	1	2	1	1	1	3	5	6	4	3	3	3	2	2	2	2	1	0	0	0	0	0	0	0	0	0	0	2	1	3	1	0	1	1	5	6	6	6	4	2	#NULL!	5	4
2	33	7	2	1	1	1	1	2	3	1	6	2	2	6	3	3	3	3	-1	2	2	2	1	0	0	0	0	0	0	0	1	0	0	1	0	3	1	1	1	1	5	4	6	#NULL!	5	5	#NULL!	4	4
2	28	3	2	4	3	3	1	5	2	1	5	3	3	5	3	3	3	3	3	3	3	3	0	0	0	0	0	0	0	0	0	0	0	2	0	1	1	0	0	0	2	5	6	2	4	4	2	4	4
1	33	5	1	4	1	2	1	5	1	1	6	6	5	6	-1	2	3	2	2	1	2	2	1	0	0	0	0	0	0	0	0	0	0	1	1	2	0	0	1	1	2	6	6	#NULL!	#NULL!	2	#NULL!	3	2
2	23	8	1	2	1	1	1	2	2	1	1	3	2	5	4	3	3	3	3	3	4	3	1	0	0	0	0	0	0	0	1	0	0	1	0	3	0	1	1	1	5	5	6	6	4	5	2	5	4
2	27	5	2	4	1	3	1	2	2	1	5	4	4	6	1	2	3	3	2	2	2	2	0	0	0	0	0	0	0	0	0	0	0	1	0	2	1	0	1	0	5	5	6	2	3	3	#NULL!	1	2
1	35	8	1	1	3	1	1	2	6	2	6	2	3	6	3	3	3	3	3	2	3	3	0	0	0	0	0	0	0	0	0	0	0	1	1	3	0	1	0	1	5	#NULL!	5	#NULL!	5	4	#NULL!	4	4
2	19	7	1	2	1	1	1	2	1	1	1	1	2	6	3	3	3	3	3	3	3	3	1	0	0	0	0	0	0	0	0	0	0	2	0	3	0	1	1	1	5	6	6	6	6	5	#NULL!	4	4
2	35	3	2	4	3	3	1	1	1	5	6	2	2	5	3	3	3	3	3	3	3	3	0	0	0	0	0	0	0	0	0	0	0	2	0	1	1	0	0	0	6	6	2	#NULL!	5	5	2	4	4
1	22	8	1	2	1	4	1	1	1	1	6	1	3	6	4	2	2	3	2	3	2	2	1	0	0	0	1	0	0	0	0	0	0	2	1	3	0	1	1	0	6	6	6	#NULL!	6	4	#NULL!	5	2
2	27	8	1	4	1	1	1	3	1	1	1	4	4	6	4	2	2	3	3	3	3	3	0	0	0	0	0	0	0	0	0	0	0	1	0	3	0	0	1	1	4	6	6	6	3	3	#NULL!	5	2
2	34	4	3	4	1	3	1	1	1	1	6	1	1	4	4	2	3	2	-1	-1	-1	2	1	0	1	0	0	0	0	0	1	1	0	2	0	2	1	0	1	0	6	6	6	#NULL!	6	6	3	5	2
2	25	8	1	2	1	1	1	2	1	1	1	2	2	2	3	3	3	2	3	3	3	3	1	0	0	0	0	0	0	0	1	0	0	2	0	3	0	1	1	1	5	6	6	6	5	5	5	4	4
2	23	7	1	2	1	1	1	2	1	1	1	2	4	6	3	3	3	3	3	3	3	3	0	0	0	0	0	0	0	0	0	0	0	1	0	3	0	1	1	1	5	6	6	6	5	3	#NULL!	4	4
1	22	8	1	2	3	4	1	2	2	2	3	2	2	3	3	3	3	3	2	1	3	2	0	0	0	0	0	0	0	0	0	0	0	2	1	3	0	1	0	0	5	5	5	4	5	5	4	4	4
2	21	9	1	1	1	4	1	1	1	1	6	1	4	6	4	2	2	4	3	2	3	3	1	0	0	0	0	0	0	0	1	0	0	2	0	3	0	1	1	0	6	6	6	#NULL!	6	3	#NULL!	5	2
1	19	7	1	2	1	4	1	1	1	2	6	1	3	5	1	3	3	4	3	2	4	2	1	0	0	0	0	0	0	0	0	0	0	1	1	3	0	1	1	0	6	6	5	#NULL!	6	4	2	1	4
1	28	7	2	2	1	1	1	3	1	1	1	3	3	6	2	2	3	3	3	2	2	-1	0	0	0	0	0	0	0	0	0	0	0	1	1	3	1	1	1	1	4	6	6	6	4	4	#NULL!	2	2
2	32	2	2	4	1	3	1	1	1	1	6	4	4	6	3	3	4	3	2	3	3	3	0	0	0	0	0	0	0	0	0	0	0	2	0	1	1	0	1	0	6	6	6	#NULL!	3	3	#NULL!	4	4
2	35	3	2	4	1	3	1	1	1	3	6	6	3	6	4	4	4	4	3	3	3	3	0	0	0	0	0	0	0	0	0	0	0	2	0	1	1	0	1	0	6	6	4	#NULL!	#NULL!	4	#NULL!	5	5
2	23	3	1	1	1	1	1	6	2	2	3	4	4	6	3	3	4	3	4	3	4	4	0	0	0	0	0	0	0	0	0	0	0	2	0	1	0	1	1	1	#NULL!	5	5	4	3	3	#NULL!	4	4
1	19	7	1	4	2	2	1	1	1	1	1	2	2	6	4	4	4	4	4	4	4	4	0	0	0	0	0	0	0	0	0	0	0	2	1	3	0	0	0	1	6	6	6	6	5	5	#NULL!	5	5
1	31	7	4	4	1	3	1	1	1	1	1	1	1	1	4	4	4	4	4	4	4	4	0	0	0	0	0	0	0	0	0	0	0	1	1	3	0	0	1	0	6	6	6	6	6	6	6	5	5
2	22	8	1	2	3	4	1	4	1	1	6	2	2	6	4	4	4	3	2	2	3	2	0	0	0	0	0	0	0	0	0	0	0	2	0	3	0	1	0	0	3	6	6	#NULL!	5	5	#NULL!	5	5
1	35	3	2	4	1	2	1	2	2	6	6	6	4	6	4	3	4	3	3	2	1	2	1	0	0	0	0	0	0	0	0	0	0	2	1	1	1	0	1	1	5	5	#NULL!	#NULL!	#NULL!	3	#NULL!	5	4
1	33	5	2	4	1	1	1	1	1	1	1	1	1	1	4	4	3	3	3	3	3	3	0	0	0	0	0	0	0	0	0	0	0	1	1	2	1	0	1	1	6	6	6	6	6	6	6	5	5
2	32	3	2	4	2	3	1	2	2	3	6	6	1	6	3	3	3	3	3	2	2	2	0	1	1	0	0	0	0	0	0	0	1	2	0	1	1	0	0	0	5	5	4	#NULL!	#NULL!	6	#NULL!	4	4
2	30	4	2	4	1	3	1	1	2	1	6	2	4	5	2	2	2	3	3	2	3	3	0	0	0	0	0	0	0	0	0	0	0	1	0	2	1	0	1	0	6	5	6	#NULL!	5	3	2	2	2
2	29	8	2	4	3	1	1	1	5	5	1	1	4	3	2	3	3	3	3	3	3	3	0	0	0	0	0	0	0	0	0	0	0	2	0	3	1	0	0	1	6	2	2	6	6	3	4	2	4
2	18	8	1	2	2	4	1	3	1	1	6	1	2	6	3	4	4	4	3	3	4	4	1	0	0	0	0	0	0	0	1	0	0	2	0	3	0	1	0	0	4	6	6	#NULL!	6	5	#NULL!	4	5
2	32	8	2	4	1	1	1	1	1	1	1	2	4	4	4	2	4	3	3	3	-1	3	0	0	0	0	0	0	0	0	1	0	0	1	0	3	1	0	1	1	6	6	6	6	5	3	3	5	2
2	34	7	2	4	3	3	1	3	1	1	1	1	2	6	3	3	3	2	3	3	3	3	0	0	0	0	0	0	0	0	0	0	0	1	0	3	1	0	0	0	4	6	6	6	6	5	#NULL!	4	4
1	35	3	2	4	1	1	1	1	6	5	6	6	6	5	3	3	3	3	3	3	3	3	1	0	0	0	0	0	0	0	0	0	0	2	1	1	1	0	1	1	6	#NULL!	2	#NULL!	#NULL!	#NULL!	2	4	4
1	34	9	2	4	3	1	1	2	2	2	2	2	2	2	3	2	3	3	3	2	3	2	1	0	1	0	0	0	0	0	0	0	1	2	1	3	1	0	0	1	5	5	5	5	5	5	5	4	2
2	27	8	2	4	1	3	1	1	1	1	6	5	4	6	4	4	3	4	3	2	4	2	0	0	0	0	0	0	0	0	0	0	0	1	0	3	1	0	1	0	6	6	6	#NULL!	2	3	#NULL!	5	5
2	28	3	2	4	1	1	1	1	5	4	6	5	4	6	-1	2	2	2	2	2	2	2	0	0	0	0	0	0	0	0	0	0	0	2	0	1	1	0	1	1	6	2	3	#NULL!	2	3	#NULL!	3	2
2	22	8	1	2	1	4	1	3	1	1	5	3	1	6	3	3	3	4	3	2	4	3	0	0	0	0	0	1	0	0	0	0	0	2	0	3	0	1	1	0	4	6	6	2	4	6	#NULL!	4	4
2	22	7	1	2	1	2	1	1	1	1	1	1	4	6	4	3	3	3	4	3	3	2	0	0	0	0	0	0	0	1	1	0	0	1	0	3	0	1	1	1	6	6	6	6	6	3	#NULL!	5	4
2	21	8	1	2	3	4	1	1	1	1	6	1	2	1	3	3	3	3	2	1	3	3	1	0	0	0	0	0	0	0	0	0	0	2	0	3	0	1	0	0	6	6	6	#NULL!	6	5	6	4	4
2	31	8	2	4	2	1	1	1	1	1	1	1	1	6	3	3	3	3	3	3	3	3	1	0	0	0	0	0	0	0	1	0	0	1	0	3	1	0	0	1	6	6	6	6	6	6	#NULL!	4	4
1	23	8	1	1	3	4	1	1	1	1	6	1	2	6	4	4	4	4	4	4	4	4	1	0	0	0	0	0	0	0	0	0	0	2	1	3	0	1	0	0	6	6	6	#NULL!	6	5	#NULL!	5	5
2	27	7	1	4	2	1	1	2	2	1	6	6	2	5	3	3	3	3	3	2	3	3	1	1	0	0	0	0	0	0	0	0	0	2	0	3	0	0	0	1	5	5	6	#NULL!	#NULL!	5	2	4	4
1	28	8	1	1	2	1	1	2	4	1	6	2	4	6	4	3	3	4	2	3	2	2	0	0	0	0	0	0	0	0	1	0	0	2	1	3	0	1	0	1	5	3	6	#NULL!	5	3	#NULL!	5	4
2	35	3	2	4	1	1	1	3	1	1	3	2	2	6	3	3	3	3	3	3	3	3	0	0	0	0	0	0	0	0	0	0	0	2	0	1	1	0	1	1	4	6	6	4	5	5	#NULL!	4	4
1	20	8	1	2	3	4	1	2	2	2	6	2	2	3	4	4	4	3	3	3	4	3	0	0	0	0	1	0	0	0	0	0	0	2	1	3	0	1	0	0	5	5	5	#NULL!	5	5	4	5	5
2	33	8	2	4	3	1	1	1	1	1	1	1	4	6	3	3	3	3	3	3	3	3	0	0	0	0	0	1	0	1	0	0	1	1	0	3	1	0	0	1	6	6	6	6	6	3	#NULL!	4	4
2	24	3	2	4	1	3	1	6	1	4	3	4	4	6	3	3	3	2	3	2	3	2	0	0	0	0	0	0	0	0	0	0	0	2	0	1	1	0	1	0	#NULL!	6	3	4	3	3	#NULL!	4	4
2	30	7	2	4	1	2	1	2	1	1	1	1	1	5	4	3	3	3	3	3	3	3	0	0	1	0	0	0	0	0	0	0	0	1	0	3	1	0	1	1	5	6	6	6	6	6	2	5	4
2	32	3	2	4	1	2	1	2	3	1	5	6	4	6	3	3	3	3	3	3	3	2	0	0	0	0	0	0	0	0	0	0	0	2	0	1	1	0	1	1	5	4	6	2	#NULL!	3	#NULL!	4	4
1	18	4	1	2	2	4	1	3	2	2	6	4	4	6	2	4	3	3	2	1	3	3	1	0	0	0	0	0	0	0	1	0	0	2	1	2	0	1	0	0	4	5	5	#NULL!	3	3	#NULL!	2	5
2	29	8	2	4	3	1	1	5	2	1	6	1	4	6	3	3	3	2	3	3	3	2	1	0	1	0	0	0	0	0	0	0	0	1	0	3	1	0	0	1	2	5	6	#NULL!	6	3	#NULL!	4	4
1	19	8	1	2	1	4	1	4	1	1	6	2	2	6	1	2	3	3	2	2	3	2	0	0	0	0	0	0	0	0	0	0	0	2	1	3	0	1	1	0	3	6	6	#NULL!	5	5	#NULL!	1	2
1	19	8	1	2	3	4	1	3	1	1	6	2	3	6	4	3	3	3	3	3	3	2	0	0	0	0	0	0	0	0	1	0	0	2	1	3	0	1	0	0	4	6	6	#NULL!	5	4	#NULL!	5	4
2	35	7	2	2	1	1	1	4	3	1	2	3	3	5	3	3	3	3	3	3	3	3	0	0	0	0	0	0	0	0	0	0	0	1	0	3	1	1	1	1	3	4	6	5	4	4	2	4	4
2	26	8	1	4	1	1	1	4	1	1	1	5	1	6	3	3	-1	3	3	-1	4	3	0	0	0	0	0	0	0	1	1	0	0	1	0	3	0	0	1	1	3	6	6	6	2	6	#NULL!	4	4
2	32	3	2	4	1	2	1	3	2	1	6	6	3	6	3	2	3	3	2	2	2	2	1	0	0	0	0	0	0	0	0	0	0	1	0	1	1	0	1	1	4	5	6	#NULL!	#NULL!	4	#NULL!	4	2
1	19	7	1	4	3	4	1	4	2	2	6	6	2	6	4	4	4	4	3	4	4	4	0	0	0	0	0	0	0	0	0	0	0	2	1	3	0	0	0	0	3	5	5	#NULL!	#NULL!	5	#NULL!	5	5
2	33	7	2	3	2	3	1	2	2	1	2	2	3	4	3	2	3	3	2	3	3	3	0	0	0	0	0	0	0	0	0	0	0	1	0	3	1	1	0	0	5	5	6	5	5	4	3	4	2
2	29	7	2	4	1	1	1	3	1	1	1	3	2	1	3	-1	2	-1	-1	4	2	-1	0	0	0	0	0	0	0	0	0	0	0	2	0	3	1	0	1	1	4	6	6	6	4	5	6	4	3
2	34	3	2	4	1	1	1	1	1	2	6	6	2	6	3	3	3	3	3	3	3	3	0	0	0	0	0	0	0	0	0	0	0	1	0	1	1	0	1	1	6	6	5	#NULL!	#NULL!	5	#NULL!	4	4
1	19	2	1	4	1	3	1	1	1	1	6	1	2	6	3	3	3	3	3	3	3	3	0	0	0	0	0	0	0	0	0	0	0	2	1	1	0	0	1	0	6	6	6	#NULL!	6	5	#NULL!	4	4
1	26	8	2	4	2	1	1	2	1	1	1	6	3	6	4	4	4	4	3	3	3	3	0	0	0	0	0	0	0	0	0	0	0	1	1	3	1	0	0	1	5	6	6	6	#NULL!	4	#NULL!	5	5
2	31	3	2	4	3	3	1	1	2	1	6	3	5	6	2	3	3	3	2	3	3	3	0	0	1	0	0	0	1	1	0	0	0	1	0	1	1	0	0	0	6	5	6	#NULL!	4	2	#NULL!	2	4
2	19	8	1	4	4	4	1	2	1	1	6	2	3	6	4	3	3	2	2	3	3	3	1	0	0	0	0	0	0	0	0	0	0	2	0	3	0	0	0	0	5	6	6	#NULL!	5	4	#NULL!	5	4
2	31	5	2	4	1	3	1	3	1	1	6	6	4	6	3	3	-1	3	2	-1	3	-1	0	0	0	0	0	0	0	0	0	0	0	1	0	2	1	0	1	0	4	6	6	#NULL!	#NULL!	3	#NULL!	4	4
2	35	3	2	4	1	3	1	5	2	1	6	1	3	6	-1	3	3	3	2	3	3	2	0	0	0	0	0	0	0	0	0	0	0	2	0	1	1	0	1	0	2	5	6	#NULL!	6	4	#NULL!	3	4
2	18	4	1	4	2	4	1	1	4	3	6	1	4	6	3	2	2	2	2	2	2	2	1	0	0	1	0	0	0	0	0	0	1	2	0	2	0	0	0	0	6	3	4	#NULL!	6	3	#NULL!	4	2
2	20	7	1	2	1	4	1	2	2	1	6	1	4	6	3	3	3	3	3	3	3	3	0	0	0	0	0	0	0	0	1	0	0	2	0	3	0	1	1	0	5	5	6	#NULL!	6	3	#NULL!	4	4
1	35	3	4	4	1	1	1	1	3	1	2	2	4	5	4	3	3	3	3	3	4	3	0	0	0	0	0	0	0	0	0	0	0	2	1	1	0	0	1	1	6	4	6	5	5	3	2	5	4
1	34	7	2	4	2	1	1	1	1	1	1	2	3	3	2	2	2	2	1	1	1	1	0	0	1	0	0	1	0	1	1	0	0	1	1	3	1	0	0	1	6	6	6	6	5	4	4	2	2
2	20	7	1	2	1	2	1	2	1	1	2	2	3	6	4	4	4	3	3	3	4	3	0	0	0	0	0	0	0	0	0	0	0	2	0	3	0	1	1	1	5	6	6	5	5	4	#NULL!	5	5
1	19	7	1	2	3	4	1	2	2	1	2	2	2	3	3	3	3	3	3	3	3	3	1	0	0	0	0	0	0	0	0	0	0	2	1	3	0	1	0	0	5	5	6	5	5	5	4	4	4
2	31	8	2	4	2	2	1	5	2	2	6	2	5	6	3	2	3	2	2	1	3	1	0	0	0	0	0	0	0	0	0	0	0	1	0	3	1	0	0	1	2	5	5	#NULL!	5	2	#NULL!	4	2
2	25	6	1	2	3	3	1	3	1	1	6	6	3	6	3	3	3	3	3	3	3	3	0	0	0	0	0	0	0	0	0	0	0	2	0	2	0	1	0	0	4	6	6	#NULL!	#NULL!	4	#NULL!	4	4
2	18	4	1	2	1	4	1	3	1	1	6	2	2	6	4	3	3	3	3	2	3	3	1	0	0	0	0	0	0	0	0	0	0	2	0	2	0	1	1	0	4	6	6	#NULL!	5	5	#NULL!	5	4
2	29	4	2	4	3	3	1	2	1	1	6	6	3	6	4	2	3	3	3	1	3	3	0	1	1	0	0	0	0	0	0	0	0	2	0	2	1	0	0	0	5	6	6	#NULL!	#NULL!	4	#NULL!	5	2
2	33	7	2	4	1	1	1	3	2	2	1	2	2	2	4	3	3	2	3	3	3	3	0	0	0	0	0	0	0	0	0	0	0	1	0	3	1	0	1	1	4	5	5	6	5	5	5	5	4
1	34	7	2	4	3	1	1	1	6	1	1	1	3	6	3	3	3	3	3	3	3	3	1	0	0	0	0	1	0	1	1	0	0	1	1	3	1	0	0	1	6	#NULL!	6	6	6	4	#NULL!	4	4
1	32	7	2	1	1	3	1	1	1	1	1	1	1	6	4	4	4	4	4	4	4	4	0	0	0	0	0	0	0	0	0	0	0	1	1	3	1	1	1	0	6	6	6	6	6	6	#NULL!	5	5
2	27	3	2	4	3	1	1	6	2	6	6	6	4	6	3	-1	-1	-1	3	-1	-1	-1	0	0	0	0	0	0	0	0	0	0	0	2	0	1	1	0	0	1	#NULL!	5	#NULL!	#NULL!	#NULL!	3	#NULL!	4	3
2	32	2	2	4	1	1	1	6	1	6	6	6	4	6	2	3	2	2	2	2	2	2	0	0	0	0	0	0	0	0	0	0	0	1	0	1	1	0	1	1	#NULL!	6	#NULL!	#NULL!	#NULL!	3	#NULL!	2	4
2	35	3	2	4	1	3	1	6	1	2	6	6	2	6	3	3	-1	3	3	-1	2	2	0	0	0	0	0	0	0	0	0	0	0	2	0	1	1	0	1	0	#NULL!	6	5	#NULL!	#NULL!	5	#NULL!	4	4
2	19	4	1	4	3	4	1	3	1	2	6	2	5	6	4	3	4	4	3	3	3	3	0	0	0	0	0	0	0	0	0	0	0	1	0	2	0	0	0	0	4	6	5	#NULL!	5	2	#NULL!	5	4
2	32	8	2	4	2	3	1	3	1	1	6	6	2	6	2	2	2	2	2	2	2	3	0	0	0	0	0	0	0	0	0	0	0	2	0	3	1	0	0	0	4	6	6	#NULL!	#NULL!	5	#NULL!	2	2
1	32	5	2	4	1	1	1	2	3	1	3	2	3	3	3	4	4	4	3	3	3	3	1	0	0	0	0	0	0	0	1	0	0	1	1	2	1	0	1	1	5	4	6	4	5	4	4	4	5
2	27	5	2	4	3	3	1	3	1	1	6	6	2	6	3	3	3	3	3	3	3	3	0	0	0	0	0	0	0	0	0	0	0	2	0	2	1	0	0	0	4	6	6	#NULL!	#NULL!	5	#NULL!	4	4
1	29	3	2	4	1	1	1	2	3	1	1	2	4	6	4	4	4	4	4	3	4	4	0	0	0	0	0	0	0	0	0	0	0	1	1	1	1	0	1	1	5	4	6	6	5	3	#NULL!	5	5
1	21	8	1	2	1	4	1	1	1	2	6	3	3	6	3	2	3	3	3	3	2	2	1	1	0	0	0	0	0	0	0	0	1	2	1	3	0	1	1	0	6	6	5	#NULL!	4	4	#NULL!	4	2
2	31	7	2	4	1	1	1	4	1	1	1	2	1	5	3	3	3	3	3	3	3	3	0	0	0	0	0	0	0	0	0	0	0	1	0	3	1	0	1	1	3	6	6	6	5	6	2	4	4
2	18	4	1	4	3	4	1	2	1	1	1	2	1	2	4	4	3	4	2	1	4	3	1	1	0	0	0	0	0	0	1	0	1	2	0	2	0	0	0	0	5	6	6	6	5	6	5	5	5
1	31	3	2	4	3	1	1	4	3	1	6	3	2	6	4	4	3	4	3	3	3	2	0	0	0	0	0	0	0	0	1	0	0	2	1	1	1	0	0	1	3	4	6	#NULL!	4	5	#NULL!	5	5
2	30	7	2	4	1	2	1	2	1	1	1	1	1	5	4	3	3	3	3	3	3	3	0	0	1	0	0	0	0	0	0	0	0	1	0	3	1	0	1	1	5	6	6	6	6	6	2	5	4
2	29	7	2	4	3	3	1	1	1	1	3	2	1	2	3	3	3	3	3	3	3	3	0	0	0	0	0	0	0	0	0	0	0	2	0	3	1	0	0	0	6	6	6	4	5	6	5	4	4
1	18	5	1	4	1	4	1	2	1	1	6	2	4	6	4	3	3	3	3	2	4	4	1	0	0	0	0	0	0	0	0	0	0	2	1	2	0	0	1	0	5	6	6	#NULL!	5	3	#NULL!	5	4
2	25	7	1	2	3	1	1	2	2	1	1	2	2	6	4	3	4	4	3	3	3	3	0	0	0	0	0	0	0	0	1	0	0	2	0	3	0	1	0	1	5	5	6	6	5	5	#NULL!	5	4
2	32	7	4	1	1	1	1	2	1	6	6	5	2	6	2	4	3	3	3	3	3	3	0	0	0	0	0	0	0	0	0	0	0	1	0	3	0	1	1	1	5	6	#NULL!	#NULL!	2	5	#NULL!	2	5
1	28	3	1	4	1	2	1	4	4	5	6	5	2	6	3	3	3	3	3	3	3	3	0	0	0	0	0	0	0	0	0	0	0	2	1	1	0	0	1	1	3	3	2	#NULL!	2	5	#NULL!	4	4
2	35	3	3	4	3	1	1	1	6	1	6	6	1	6	-1	2	2	3	3	2	2	2	0	0	0	0	0	0	0	0	0	0	0	1	0	1	1	0	0	1	6	#NULL!	6	#NULL!	#NULL!	6	#NULL!	3	2
1	25	5	1	4	3	1	1	2	1	1	1	3	2	5	3	3	3	3	3	3	3	3	0	0	0	0	0	0	0	0	0	0	0	1	1	2	0	0	0	1	5	6	6	6	4	5	2	4	4
1	26	4	2	4	1	1	1	1	1	1	1	1	1	1	4	4	4	4	4	4	4	4	0	0	0	0	0	0	0	1	0	0	0	2	1	2	1	0	1	1	6	6	6	6	6	6	6	5	5
2	32	7	2	4	1	1	1	1	6	6	6	5	2	6	3	3	-1	3	3	2	2	2	0	0	0	0	0	0	0	0	0	0	0	2	0	3	1	0	1	1	6	#NULL!	#NULL!	#NULL!	2	5	#NULL!	4	4
2	26	3	2	4	1	3	1	6	1	1	6	6	6	6	-1	3	-1	3	3	3	3	2	0	0	0	0	0	0	0	0	0	0	0	2	0	1	1	0	1	0	#NULL!	6	6	#NULL!	#NULL!	#NULL!	#NULL!	3	4
2	26	5	2	4	3	3	1	2	1	1	6	6	1	6	3	3	3	3	2	2	3	2	0	0	0	0	0	0	0	0	0	0	0	2	0	2	1	0	0	0	5	6	6	#NULL!	#NULL!	6	#NULL!	4	4
2	20	8	1	2	1	4	1	3	1	1	6	1	4	6	3	3	4	3	2	3	3	2	1	0	0	0	0	0	0	0	1	0	0	2	0	3	0	1	1	0	4	6	6	#NULL!	6	3	#NULL!	4	4
2	34	8	2	4	2	1	1	1	1	2	6	3	2	6	3	4	3	3	3	3	3	3	0	0	0	0	0	0	0	0	1	0	0	2	0	3	1	0	0	1	6	6	5	#NULL!	4	5	#NULL!	4	5
1	35	3	2	4	1	1	1	5	1	1	6	6	5	6	2	3	4	3	3	2	2	2	0	0	0	0	0	0	0	0	0	0	0	2	1	1	1	0	1	1	2	6	6	#NULL!	#NULL!	2	#NULL!	2	4
2	33	8	2	4	2	2	1	1	2	1	3	4	1	5	4	3	3	3	3	2	3	3	1	0	0	0	1	0	0	0	0	0	0	2	0	3	1	0	0	1	6	5	6	4	3	6	2	5	4
2	28	7	2	2	1	1	1	1	1	1	1	1	2	6	4	4	4	4	3	3	4	3	0	0	0	0	0	0	0	0	1	0	0	2	0	3	1	1	1	1	6	6	6	6	6	5	#NULL!	5	5
2	27	4	2	4	1	1	1	2	1	1	6	2	2	3	4	4	4	4	3	3	3	4	0	0	0	0	0	0	0	0	0	0	0	2	0	2	1	0	1	1	5	6	6	#NULL!	5	5	4	5	5
2	24	7	2	2	1	1	1	3	2	1	1	5	3	6	4	3	2	3	3	2	3	2	0	0	1	0	0	0	0	0	0	0	0	2	0	3	1	1	1	1	4	5	6	6	2	4	#NULL!	5	4
2	26	8	1	4	1	2	1	2	2	2	5	2	2	5	3	3	3	3	3	3	3	3	1	0	0	0	0	0	0	0	1	0	0	2	0	3	0	0	1	1	5	5	5	2	5	5	2	4	4
2	28	3	2	4	1	1	1	6	1	3	6	6	2	6	2	3	3	3	3	3	3	3	0	0	0	0	0	0	0	0	0	0	0	2	0	1	1	0	1	1	#NULL!	6	4	#NULL!	#NULL!	5	#NULL!	2	4
1	32	7	2	4	3	3	1	2	3	2	6	5	5	6	1	3	3	2	2	2	2	2	0	0	0	0	0	0	0	0	0	0	0	2	1	3	1	0	0	0	5	4	5	#NULL!	2	2	#NULL!	1	4
1	32	8	2	1	2	1	1	2	2	6	2	4	2	5	3	4	3	3	2	3	3	2	1	0	0	0	0	0	0	0	1	0	0	2	1	3	1	1	0	1	5	5	#NULL!	5	3	5	2	4	5
1	19	8	1	2	1	4	1	2	2	1	6	2	2	3	2	3	3	3	2	3	3	3	1	0	0	0	0	0	0	0	0	0	0	1	1	3	0	1	1	0	5	5	6	#NULL!	5	5	4	2	4
2	27	3	1	4	3	3	1	2	1	1	6	6	4	6	3	2	2	3	2	2	3	3	0	0	0	0	0	0	0	0	0	0	0	1	0	1	0	0	0	0	5	6	6	#NULL!	#NULL!	3	#NULL!	4	2
2	29	3	4	4	3	3	1	3	2	4	6	6	3	6	3	3	2	3	3	3	4	3	0	0	0	0	0	0	0	0	0	0	0	1	0	1	0	0	0	0	4	5	3	#NULL!	#NULL!	4	#NULL!	4	4
1	21	8	1	2	1	2	1	2	2	2	2	2	2	2	3	3	3	3	2	2	4	3	1	1	0	1	0	0	0	0	0	0	0	2	1	3	0	1	1	1	5	5	5	5	5	5	5	4	4
2	32	3	2	4	4	3	1	1	1	1	6	1	2	6	4	3	3	3	3	3	3	3	0	0	0	0	0	0	0	0	0	0	0	2	0	1	1	0	0	0	6	6	6	#NULL!	6	5	#NULL!	5	4
1	33	3	2	4	1	1	1	1	6	1	1	1	3	6	3	3	2	2	2	2	3	2	1	1	0	0	0	0	0	0	0	0	0	2	1	1	1	0	1	1	6	#NULL!	6	6	6	4	#NULL!	4	4
2	30	7	2	4	3	1	1	3	2	2	2	5	3	6	4	3	3	3	2	2	3	3	1	0	0	0	0	0	0	0	0	0	0	2	0	3	1	0	0	1	4	5	5	5	2	4	#NULL!	5	4
1	21	7	1	2	1	4	1	1	2	1	2	1	3	6	3	3	4	3	3	3	3	3	0	0	0	0	0	0	0	0	0	0	0	1	1	3	0	1	1	0	6	5	6	5	6	4	#NULL!	4	4
2	35	3	2	4	3	3	1	6	1	6	6	6	3	6	3	2	2	3	2	2	3	-1	0	0	0	0	0	0	0	0	0	0	0	2	0	1	1	0	0	0	#NULL!	6	#NULL!	#NULL!	#NULL!	4	#NULL!	4	2
1	34	6	2	4	3	1	1	2	2	1	3	3	3	6	2	2	2	2	2	2	2	2	0	0	0	0	0	0	0	0	0	0	0	2	1	2	1	0	0	1	5	5	6	4	4	4	#NULL!	2	2
2	30	7	2	4	1	1	1	4	6	3	6	6	6	6	4	4	4	4	4	4	4	4	0	0	0	0	0	0	0	0	0	0	0	1	0	3	1	0	1	1	3	#NULL!	4	#NULL!	#NULL!	#NULL!	#NULL!	5	5
2	34	7	2	4	1	3	1	3	2	2	6	2	2	6	2	3	3	2	3	2	1	1	0	0	1	0	0	0	0	0	0	0	1	2	0	3	1	0	1	0	4	5	5	#NULL!	5	5	#NULL!	2	4
1	22	8	1	1	1	3	1	1	1	1	2	3	3	6	4	4	2	3	3	1	3	3	0	0	0	0	0	0	0	0	0	0	0	2	1	3	0	1	1	0	6	6	6	5	4	4	#NULL!	5	5
2	29	6	2	2	1	3	1	3	1	3	6	3	3	6	3	3	3	2	3	2	2	2	1	0	0	0	0	0	0	0	0	0	0	2	0	2	1	1	1	0	4	6	4	#NULL!	4	4	#NULL!	4	4
2	19	4	1	4	3	4	1	1	1	1	6	2	2	6	2	3	3	3	2	3	3	3	0	0	0	0	0	0	0	0	0	0	0	2	0	2	0	0	0	0	6	6	6	#NULL!	5	5	#NULL!	2	4
2	34	7	2	1	1	3	1	4	2	1	6	3	2	6	4	4	4	3	3	3	3	3	0	0	1	0	0	0	0	0	1	0	0	1	0	3	1	1	1	0	3	5	6	#NULL!	4	5	#NULL!	5	5
1	32	7	2	4	2	1	1	1	1	1	1	1	6	6	4	4	4	4	3	3	4	3	0	0	0	0	0	0	0	0	0	0	0	2	1	3	1	0	0	1	6	6	6	6	6	#NULL!	#NULL!	5	5
1	18	4	1	4	3	4	1	3	3	2	6	1	6	6	4	4	4	4	2	3	3	4	0	0	0	0	1	0	1	0	0	0	0	2	1	2	0	0	0	0	4	4	5	#NULL!	6	#NULL!	#NULL!	5	5
2	19	7	1	2	3	1	1	3	1	2	2	2	4	6	3	3	3	3	3	3	3	3	0	0	0	0	0	0	0	0	0	0	0	2	0	3	0	1	0	1	4	6	5	5	5	3	#NULL!	4	4
1	30	2	2	4	3	3	1	4	1	1	6	6	4	6	4	3	4	4	3	3	3	3	0	0	0	0	0	0	0	0	0	0	0	1	1	1	1	0	0	0	3	6	6	#NULL!	#NULL!	3	#NULL!	5	4
1	32	8	2	1	1	1	1	1	1	1	1	4	3	6	3	1	3	3	1	1	1	3	1	0	0	0	0	0	0	0	0	0	0	2	1	3	1	1	1	1	6	6	6	6	3	4	#NULL!	4	1
2	26	3	2	4	4	3	1	1	1	1	6	1	1	6	3	3	3	3	3	3	3	2	0	0	0	0	0	0	0	0	0	0	0	2	0	1	1	0	0	0	6	6	6	#NULL!	6	6	#NULL!	4	4
1	25	9	1	1	1	4	1	1	1	1	1	1	4	6	3	3	2	3	3	3	3	3	1	0	0	0	1	0	0	0	1	0	0	2	1	3	0	1	1	0	6	6	6	6	6	3	#NULL!	4	4
1	24	5	2	4	1	3	1	5	1	1	6	6	5	6	4	4	4	4	3	3	4	3	0	0	0	0	0	0	0	0	0	0	0	2	1	2	1	0	1	0	2	6	6	#NULL!	#NULL!	2	#NULL!	5	5
2	19	8	1	2	3	4	1	3	1	2	6	2	4	5	2	3	3	3	2	3	3	3	1	0	0	0	0	0	0	0	1	0	0	2	0	3	0	1	0	0	4	6	5	#NULL!	5	3	2	2	4
1	35	4	2	1	3	3	1	1	2	3	2	1	5	6	3	4	4	3	3	2	3	2	0	0	0	0	0	0	0	0	0	0	0	1	1	2	1	1	0	0	6	5	4	5	6	2	#NULL!	4	5
1	26	7	1	2	1	1	1	6	1	1	1	4	1	6	3	2	3	3	3	3	3	3	0	0	0	0	0	0	0	0	0	0	0	2	1	3	0	1	1	1	#NULL!	6	6	6	3	6	#NULL!	4	2
2	23	8	1	2	3	3	1	2	1	2	6	2	4	5	3	3	3	3	2	2	3	3	1	0	0	0	0	0	0	0	0	0	0	2	0	3	0	1	0	0	5	6	5	#NULL!	5	3	2	4	4
2	28	4	2	4	1	1	1	1	1	1	2	3	4	6	3	3	3	3	3	3	3	3	1	0	1	0	1	1	0	1	0	0	0	1	0	2	1	0	1	1	6	6	6	5	4	3	#NULL!	4	4
1	31	5	2	4	1	1	1	5	1	1	1	3	2	6	3	2	3	3	2	2	3	3	0	0	0	0	0	0	0	0	0	0	0	1	1	2	1	0	1	1	2	6	6	6	4	5	#NULL!	4	2
2	35	7	2	4	2	1	1	1	2	1	1	2	1	1	2	3	3	3	2	2	3	2	0	0	1	0	0	0	0	0	0	0	0	2	0	3	1	0	0	1	6	5	6	6	5	6	6	2	4
1	28	3	2	4	1	1	1	4	3	2	6	2	4	6	3	2	3	3	2	2	3	1	0	0	0	0	0	0	0	0	0	0	0	1	1	1	1	0	1	1	3	4	5	#NULL!	5	3	#NULL!	4	2
1	25	5	1	4	1	3	1	1	1	1	6	5	2	5	4	4	4	4	3	4	3	3	1	0	0	0	0	0	0	0	0	0	0	2	1	2	0	0	1	0	6	6	6	#NULL!	2	5	2	5	5
2	31	8	2	2	1	3	1	1	1	1	5	6	1	1	3	3	3	3	3	2	3	3	0	0	0	0	0	0	0	0	0	0	0	2	0	3	1	1	1	0	6	6	6	2	#NULL!	6	6	4	4
1	26	3	2	4	1	1	1	3	2	2	6	6	2	6	3	3	3	3	3	3	3	2	1	0	0	0	0	0	0	0	0	0	0	1	1	1	1	0	1	1	4	5	5	#NULL!	#NULL!	5	#NULL!	4	4
2	23	8	1	1	1	1	1	1	2	1	1	1	2	2	4	3	3	3	2	2	3	3	1	0	0	0	0	0	0	0	0	0	0	2	0	3	0	1	1	1	6	5	6	6	6	5	5	5	4
1	32	3	2	4	1	3	1	1	4	3	6	6	5	6	3	3	3	3	3	-1	-1	-1	0	0	0	0	0	0	0	0	0	0	0	2	1	1	1	0	1	0	6	3	4	#NULL!	#NULL!	2	#NULL!	4	4
2	27	4	2	4	1	3	1	2	2	1	6	6	4	6	2	3	3	3	3	3	3	3	1	0	1	0	0	0	1	0	0	0	0	1	0	2	1	0	1	0	5	5	6	#NULL!	#NULL!	3	#NULL!	2	4
2	27	3	2	4	1	3	1	5	1	6	6	6	3	6	2	3	3	3	2	3	3	3	0	0	0	0	0	0	0	1	0	0	0	1	0	1	1	0	1	0	2	6	#NULL!	#NULL!	#NULL!	4	#NULL!	2	4
2	31	3	2	4	1	3	1	1	1	1	6	6	4	6	3	3	3	2	3	3	3	3	0	0	0	0	0	0	0	0	0	0	0	1	0	1	1	0	1	0	6	6	6	#NULL!	#NULL!	3	#NULL!	4	4
1	18	4	1	4	1	4	1	3	1	2	6	1	4	6	3	3	3	3	3	3	3	3	0	0	0	0	0	0	0	0	0	0	0	2	1	2	0	0	1	0	4	6	5	#NULL!	6	3	#NULL!	4	4
2	29	3	3	4	3	3	1	1	2	2	1	4	2	6	3	1	1	2	2	2	2	1	1	0	0	0	0	0	0	0	0	0	0	1	0	1	1	0	0	0	6	5	5	6	3	5	#NULL!	4	1
1	28	7	1	4	3	1	1	1	3	1	6	6	6	6	4	4	4	4	3	2	4	3	0	0	0	0	0	0	0	0	0	0	0	1	1	3	0	0	0	1	6	4	6	#NULL!	#NULL!	#NULL!	#NULL!	5	5
2	29	4	2	4	1	3	1	2	2	6	5	1	2	6	2	1	3	3	1	1	1	1	0	0	0	0	0	0	0	0	0	0	0	2	0	2	1	0	1	0	5	5	#NULL!	2	6	5	#NULL!	2	1
2	29	4	2	4	1	3	1	2	2	2	6	6	4	6	3	3	3	3	3	3	3	3	0	0	0	0	0	0	0	0	0	0	0	2	0	2	1	0	1	0	5	5	5	#NULL!	#NULL!	3	#NULL!	4	4
1	26	7	1	4	1	1	1	1	1	3	3	6	2	2	4	3	3	2	3	2	3	2	1	0	0	0	0	0	0	0	0	0	0	2	1	3	0	0	1	1	6	6	4	4	#NULL!	5	5	5	4
2	33	3	2	4	1	1	1	3	1	1	6	3	4	5	3	3	2	2	3	2	3	3	1	0	0	0	0	1	0	1	1	0	0	1	0	1	1	0	1	1	4	6	6	#NULL!	4	3	2	4	4
1	22	3	2	4	1	1	1	1	1	1	6	1	6	6	4	1	3	4	1	1	-1	1	0	1	0	1	0	1	0	0	1	0	0	2	1	1	1	0	1	1	6	6	6	#NULL!	6	#NULL!	#NULL!	5	1
2	32	3	2	4	1	1	1	1	1	1	1	1	1	6	4	4	3	3	3	2	3	2	0	0	0	0	0	0	0	0	1	0	0	2	0	1	1	0	1	1	6	6	6	6	6	6	#NULL!	5	5
1	22	4	2	4	1	1	1	1	1	1	6	6	4	6	3	3	3	3	3	3	2	2	1	0	0	0	0	0	0	0	0	0	0	1	1	2	1	0	1	1	6	6	6	#NULL!	#NULL!	3	#NULL!	4	4
2	20	4	1	2	1	4	1	3	1	3	6	2	3	6	3	3	3	3	3	3	3	3	1	0	0	0	0	0	0	0	0	0	0	2	0	2	0	1	1	0	4	6	4	#NULL!	5	4	#NULL!	4	4
1	29	3	1	4	1	3	1	4	1	3	6	6	6	6	4	3	3	3	3	3	3	3	0	0	0	0	0	0	0	0	0	0	0	2	1	1	0	0	1	0	3	6	4	#NULL!	#NULL!	#NULL!	#NULL!	5	4
2	31	3	2	4	1	3	1	3	1	1	6	1	4	6	4	4	4	4	4	4	4	4	0	0	0	0	0	0	0	0	0	0	0	2	0	1	1	0	1	0	4	6	6	#NULL!	6	3	#NULL!	5	5
2	35	8	2	1	3	1	1	2	4	2	1	1	3	3	4	4	4	3	3	2	3	2	0	0	0	0	0	0	0	0	0	0	0	1	0	3	1	1	0	1	5	3	5	6	6	4	4	5	5
1	29	7	2	4	1	1	1	1	2	1	1	3	1	2	4	3	3	3	3	3	3	3	1	1	1	0	0	0	1	0	0	0	1	2	1	3	1	0	1	1	6	5	6	6	4	6	5	5	4
1	29	3	2	4	1	1	1	5	2	1	6	6	2	6	-1	2	3	3	3	2	2	2	0	0	0	0	0	0	0	0	0	0	0	2	1	1	1	0	1	1	2	5	6	#NULL!	#NULL!	5	#NULL!	3	2
2	28	4	2	4	1	1	1	5	1	3	1	6	3	6	3	3	3	2	3	2	2	2	0	0	0	0	0	0	0	0	0	0	0	2	0	2	1	0	1	1	2	6	4	6	#NULL!	4	#NULL!	4	4
1	33	3	2	4	2	1	1	1	1	1	6	5	2	6	4	4	4	4	4	4	4	4	0	0	0	0	0	0	0	0	0	0	0	1	1	1	1	0	0	1	6	6	6	#NULL!	2	5	#NULL!	5	5
1	19	4	1	2	1	4	1	3	1	1	6	2	4	6	3	4	3	3	-1	3	3	-1	1	0	0	0	0	0	0	1	0	0	0	1	1	2	0	1	1	0	4	6	6	#NULL!	5	3	#NULL!	4	5
2	34	3	3	4	4	3	1	4	4	4	6	3	4	6	4	3	3	3	2	2	3	3	0	0	0	0	0	0	0	0	0	0	0	2	0	1	1	0	0	0	3	3	3	#NULL!	4	3	#NULL!	5	4
2	27	3	2	4	1	3	1	3	1	1	6	6	6	6	3	3	3	3	3	3	3	3	0	0	0	0	0	0	0	0	0	0	0	2	0	1	1	0	1	0	4	6	6	#NULL!	#NULL!	#NULL!	#NULL!	4	4
2	28	8	2	4	1	3	1	1	1	1	6	1	1	6	4	2	3	2	1	2	3	2	1	0	0	0	0	0	0	0	1	0	0	2	0	3	1	0	1	0	6	6	6	#NULL!	6	6	#NULL!	5	2
2	21	7	1	2	1	3	1	3	2	1	6	4	4	6	3	3	3	3	2	2	3	3	1	0	0	0	0	0	0	0	0	0	0	2	0	3	0	1	1	0	4	5	6	#NULL!	3	3	#NULL!	4	4
1	19	4	1	4	1	4	1	3	2	1	4	1	4	6	4	4	4	4	3	3	4	3	0	0	0	0	0	0	0	0	0	0	0	1	1	2	0	0	1	0	4	5	6	3	6	3	#NULL!	5	5
2	21	7	1	2	1	4	1	4	1	2	6	2	3	6	3	3	3	4	3	3	3	3	0	0	0	0	0	0	0	0	0	0	0	2	0	3	0	1	1	0	3	6	5	#NULL!	5	4	#NULL!	4	4
2	33	3	2	4	1	1	1	6	1	3	3	6	3	6	3	2	3	3	-1	2	1	1	0	0	0	0	0	0	0	0	0	0	0	2	0	1	1	0	1	1	#NULL!	6	4	4	#NULL!	4	#NULL!	4	2
2	34	6	3	4	1	1	1	6	6	5	1	2	3	6	2	2	3	3	3	2	3	3	0	0	0	0	0	0	0	0	0	0	0	2	0	2	1	0	1	1	#NULL!	#NULL!	2	6	5	4	#NULL!	2	2
1	35	3	2	4	1	1	1	1	1	4	6	2	2	6	4	4	4	4	3	3	3	3	0	0	0	0	0	0	0	0	0	0	0	1	1	1	1	0	1	1	6	6	3	#NULL!	5	5	#NULL!	5	5
1	35	7	2	4	2	1	1	1	1	1	1	4	2	6	4	3	4	4	4	4	4	4	1	0	0	0	0	1	0	0	1	0	0	2	1	3	1	0	0	1	6	6	6	6	3	5	#NULL!	5	4
2	22	8	1	4	1	4	1	2	3	1	6	4	4	6	3	3	3	3	3	2	3	2	1	0	0	0	0	0	0	0	0	0	0	2	0	3	0	0	1	0	5	4	6	#NULL!	3	3	#NULL!	4	4
1	25	3	1	2	3	3	1	5	2	1	2	6	3	6	4	3	3	3	3	3	3	3	0	0	0	0	0	0	0	0	0	0	0	2	1	1	0	1	0	0	2	5	6	5	#NULL!	4	#NULL!	5	4
1	35	4	2	4	2	2	1	1	6	6	6	6	2	6	4	4	4	3	3	3	4	4	1	0	0	0	0	0	0	0	0	0	0	1	1	2	1	0	0	1	6	#NULL!	#NULL!	#NULL!	#NULL!	5	#NULL!	5	5
1	21	9	1	2	2	4	1	1	1	1	2	2	4	6	3	3	3	3	3	3	3	3	0	0	0	0	0	0	0	0	1	0	0	2	1	3	0	1	0	0	6	6	6	5	5	3	#NULL!	4	4
1	35	7	2	1	2	1	1	1	1	1	1	1	5	6	4	4	4	4	4	3	4	4	0	0	0	0	0	0	0	0	0	0	0	2	1	3	1	1	0	1	6	6	6	6	6	2	#NULL!	5	5
2	21	3	1	4	1	1	1	6	1	1	6	6	4	6	4	4	4	4	4	4	4	4	0	0	0	0	0	0	0	0	0	0	0	2	0	1	0	0	1	1	#NULL!	6	6	#NULL!	#NULL!	3	#NULL!	5	5
1	19	6	1	4	1	4	1	3	2	2	6	4	2	6	3	3	3	3	3	3	3	3	0	0	0	0	0	0	0	0	0	0	0	2	1	2	0	0	1	0	4	5	5	#NULL!	3	5	#NULL!	4	4
2	30	7	2	4	1	3	1	1	1	1	3	2	1	6	1	1	3	3	1	1	1	2	0	0	0	0	0	0	0	0	0	0	0	2	0	3	1	0	1	0	6	6	6	4	5	6	#NULL!	1	1
1	35	3	2	4	1	1	1	6	1	6	6	6	5	6	1	-1	-1	3	3	3	-1	1	0	0	0	0	0	0	0	0	0	0	0	1	1	1	1	0	1	1	#NULL!	6	#NULL!	#NULL!	#NULL!	2	#NULL!	1	3
2	29	2	2	4	1	3	1	1	1	1	6	5	4	6	3	3	-1	3	3	3	-1	3	0	0	0	0	0	0	0	0	0	0	0	2	0	1	1	0	1	0	6	6	6	#NULL!	2	3	#NULL!	4	4
2	19	3	2	4	3	3	1	6	2	1	6	2	3	6	4	2	3	3	3	3	3	3	0	0	0	0	0	0	0	0	0	0	0	2	0	1	1	0	0	0	#NULL!	5	6	#NULL!	5	4	#NULL!	5	2
2	19	3	1	2	1	1	1	6	1	1	6	6	2	6	2	3	3	3	3	2	3	3	0	0	0	0	0	0	0	0	0	0	0	2	0	1	0	1	1	1	#NULL!	6	6	#NULL!	#NULL!	5	#NULL!	2	4
2	26	8	1	2	1	1	1	5	2	1	6	2	2	6	4	3	3	3	3	3	3	3	0	0	0	0	0	0	0	0	0	0	0	2	0	3	0	1	1	1	2	5	6	#NULL!	5	5	#NULL!	5	4
2	30	3	2	4	1	1	1	1	1	1	1	1	1	6	4	4	4	4	4	3	4	4	0	0	0	0	0	0	0	0	0	0	0	2	0	1	1	0	1	1	6	6	6	6	6	6	#NULL!	5	5
2	23	9	1	2	2	4	1	1	1	1	2	1	3	6	4	4	4	3	3	3	3	3	0	0	0	0	1	0	0	0	0	0	0	2	0	3	0	1	0	0	6	6	6	5	6	4	#NULL!	5	5
2	29	4	2	4	1	1	1	4	1	1	1	2	2	4	4	4	4	4	4	4	4	4	0	0	0	0	0	0	0	0	0	0	0	2	0	2	1	0	1	1	3	6	6	6	5	5	3	5	5
1	22	8	1	1	2	4	1	1	2	1	1	1	2	6	4	4	3	2	3	3	3	3	0	0	0	1	0	0	0	0	0	0	0	2	1	3	0	1	0	0	6	5	6	6	6	5	#NULL!	5	5
2	23	8	1	2	3	4	1	1	1	2	2	2	2	5	4	4	4	4	3	3	4	3	0	0	0	0	0	0	0	0	0	0	0	1	0	3	0	1	0	0	6	6	5	5	5	5	2	5	5
1	18	4	1	4	3	3	1	3	3	2	6	1	4	6	3	4	4	3	3	3	3	2	0	0	0	0	0	0	0	0	1	0	0	2	1	2	0	0	0	0	4	4	5	#NULL!	6	3	#NULL!	4	5
2	25	3	2	4	1	3	1	4	1	1	6	1	3	6	4	4	4	4	3	4	3	4	0	0	0	0	0	0	0	0	0	0	0	1	0	1	1	0	1	0	3	6	6	#NULL!	6	4	#NULL!	5	5
2	32	3	3	4	1	1	1	4	1	1	6	1	1	6	1	4	2	3	4	4	2	3	0	0	0	0	0	0	0	0	0	0	0	2	0	1	1	0	1	1	3	6	6	#NULL!	6	6	#NULL!	1	5
2	35	3	2	4	1	3	1	6	2	2	6	3	2	6	3	3	2	3	3	3	2	3	0	0	0	0	0	0	0	0	0	0	0	1	0	1	1	0	1	0	#NULL!	5	5	#NULL!	4	5	#NULL!	4	4
1	26	4	1	4	3	3	1	1	2	6	2	2	5	5	2	2	2	3	2	2	3	2	1	0	0	0	0	0	1	0	0	0	1	2	1	2	0	0	0	0	6	5	#NULL!	5	5	2	2	2	2
1	31	5	2	4	1	1	1	3	2	2	2	3	3	6	3	2	3	3	2	2	2	1	0	0	0	0	0	0	0	0	0	0	0	1	1	2	1	0	1	1	4	5	5	5	4	4	#NULL!	4	2
2	35	3	2	4	1	1	1	5	1	1	6	2	4	6	3	3	4	3	3	3	3	3	0	0	0	0	0	0	0	0	0	0	0	1	0	1	1	0	1	1	2	6	6	#NULL!	5	3	#NULL!	4	4
2	19	7	1	2	1	4	1	1	1	1	6	1	3	6	4	4	4	4	3	3	3	3	1	0	0	0	0	0	0	0	0	0	0	2	0	3	0	1	1	0	6	6	6	#NULL!	6	4	#NULL!	5	5
1	34	8	2	4	3	1	1	1	2	1	1	2	2	6	4	4	3	3	3	3	3	3	0	0	0	0	0	0	0	0	0	0	0	2	1	3	1	0	0	1	6	5	6	6	5	5	#NULL!	5	5
2	32	3	2	4	3	2	1	6	5	2	2	2	4	6	4	3	4	4	4	2	4	1	0	0	0	0	0	0	0	0	0	0	0	2	0	1	1	0	0	1	#NULL!	2	5	5	5	3	#NULL!	5	4
2	33	8	1	4	1	1	1	5	1	4	4	4	3	5	4	2	2	3	1	1	2	2	1	1	1	0	1	0	0	0	0	0	1	2	0	3	0	0	1	1	2	6	3	3	3	4	2	5	2
1	33	8	3	1	3	1	1	1	5	5	1	1	5	6	3	4	4	3	2	2	3	3	0	0	0	0	0	0	0	0	1	0	0	2	1	3	1	1	0	1	6	2	2	6	6	2	#NULL!	4	5
1	28	3	2	1	3	1	1	2	1	2	6	6	2	6	4	4	4	4	4	4	4	4	1	0	0	0	0	0	0	0	0	0	0	2	1	1	1	1	0	1	5	6	5	#NULL!	#NULL!	5	#NULL!	5	5
1	31	7	1	4	3	3	1	1	1	1	1	5	4	5	3	3	3	3	3	3	3	3	1	0	0	0	0	0	0	0	1	0	0	2	1	3	0	0	0	0	6	6	6	6	2	3	2	4	4
1	32	7	2	4	1	3	1	1	1	1	2	2	3	6	3	3	3	3	3	2	3	3	1	0	0	0	0	0	0	0	1	0	1	2	1	3	1	0	1	0	6	6	6	5	5	4	#NULL!	4	4
2	33	4	2	4	1	1	1	5	5	1	6	5	3	5	3	3	3	3	3	3	3	3	0	0	0	0	0	0	0	0	0	0	0	1	0	2	1	0	1	1	2	2	6	#NULL!	2	4	2	4	4
1	35	7	2	4	1	1	1	1	2	2	6	6	1	6	4	2	2	3	2	2	3	3	0	0	0	0	0	0	0	0	0	0	0	1	1	3	1	0	1	1	6	5	5	#NULL!	#NULL!	6	#NULL!	5	2
2	29	7	2	4	2	3	1	1	1	1	1	1	2	6	3	3	3	3	1	1	1	1	0	0	1	0	0	0	0	0	0	0	0	2	0	3	1	0	0	0	6	6	6	6	6	5	#NULL!	4	4
2	35	4	2	4	1	3	1	6	2	2	6	2	3	6	3	4	4	3	3	3	2	2	0	0	0	0	0	0	0	0	0	0	0	1	0	2	1	0	1	0	#NULL!	5	5	#NULL!	5	4	#NULL!	4	5
2	31	5	2	4	1	3	1	2	1	1	6	2	1	6	3	3	3	3	3	3	3	2	0	0	0	0	0	0	0	0	0	0	0	1	0	2	1	0	1	0	5	6	6	#NULL!	5	6	#NULL!	4	4
1	35	3	2	4	1	3	1	3	2	2	6	1	3	6	3	3	2	3	2	2	3	1	0	0	0	0	0	0	0	0	0	0	0	1	1	1	1	0	1	0	4	5	5	#NULL!	6	4	#NULL!	4	4
2	32	8	2	4	1	1	1	1	1	1	1	1	1	6	4	4	4	4	3	4	4	4	0	0	0	0	0	0	0	1	0	0	0	1	0	3	1	0	1	1	6	6	6	6	6	6	#NULL!	5	5
2	33	4	2	4	1	1	1	1	2	1	1	1	2	6	4	4	4	4	4	4	4	4	0	0	0	0	0	0	0	0	1	0	0	1	0	2	1	0	1	1	6	5	6	6	6	5	#NULL!	5	5
2	25	3	2	4	1	3	1	1	1	1	6	1	2	6	3	2	3	3	3	3	3	2	0	0	0	0	0	0	0	0	0	0	0	1	0	1	1	0	1	0	6	6	6	#NULL!	6	5	#NULL!	4	2
1	23	8	1	2	2	3	1	3	1	1	3	1	4	6	4	4	4	4	2	2	4	3	1	0	0	1	0	0	0	0	0	0	0	2	1	3	0	1	0	0	4	6	6	4	6	3	#NULL!	5	5
2	32	3	2	4	3	1	1	1	1	3	6	6	4	6	2	3	3	3	3	2	3	3	0	0	0	0	0	0	0	0	0	0	0	2	0	1	1	0	0	1	6	6	4	#NULL!	#NULL!	3	#NULL!	2	4
1	32	3	2	4	2	1	1	1	2	1	1	1	2	6	3	3	3	3	3	3	3	-1	0	0	0	0	1	0	0	0	0	1	0	2	1	1	1	0	0	1	6	5	6	6	6	5	#NULL!	4	4
2	31	4	2	2	1	3	1	4	1	1	6	6	2	6	3	3	3	3	3	3	3	2	0	0	0	0	0	0	0	0	0	0	0	1	0	2	1	1	1	0	3	6	6	#NULL!	#NULL!	5	#NULL!	4	4
1	29	3	2	4	3	1	1	2	1	2	2	3	2	6	3	3	3	3	3	3	3	3	0	0	0	0	0	0	0	0	0	0	0	1	1	1	1	0	0	1	5	6	5	5	4	5	#NULL!	4	4
2	26	3	2	4	1	3	1	5	2	1	6	6	4	6	4	4	4	4	4	4	3	3	1	0	0	0	0	0	0	0	0	0	0	1	0	1	1	0	1	0	2	5	6	#NULL!	#NULL!	3	#NULL!	5	5
2	33	3	2	4	1	3	1	6	3	1	6	6	2	6	1	1	2	2	1	2	2	1	1	0	0	1	0	0	0	0	0	0	0	2	0	1	1	0	1	0	#NULL!	4	6	#NULL!	#NULL!	5	#NULL!	1	1
1	25	8	1	2	1	1	1	2	1	1	2	3	3	1	4	4	4	4	3	3	4	3	1	0	1	0	1	0	0	0	0	0	0	1	1	3	0	1	1	1	5	6	6	5	4	4	6	5	5
2	20	8	1	2	1	4	1	4	1	1	6	1	3	6	4	3	4	3	2	3	3	3	0	0	0	0	0	0	0	0	0	0	0	1	0	3	0	1	1	0	3	6	6	#NULL!	6	4	#NULL!	5	4
1	35	7	2	1	1	1	1	1	3	4	4	1	3	4	2	2	3	3	3	3	3	2	1	0	0	0	0	0	0	1	1	0	0	1	1	3	1	1	1	1	6	4	3	3	6	4	3	2	2
1	27	2	2	4	3	3	1	6	6	6	6	6	6	1	3	3	3	3	3	3	3	3	0	0	0	0	0	0	0	0	0	0	0	2	1	1	1	0	0	0	#NULL!	#NULL!	#NULL!	#NULL!	#NULL!	#NULL!	6	4	4
2	27	3	2	4	3	3	1	3	2	1	6	2	2	6	3	2	3	3	3	3	3	2	0	0	0	0	0	0	0	0	0	0	0	2	0	1	1	0	0	0	4	5	6	#NULL!	5	5	#NULL!	4	2
2	29	3	2	4	3	3	1	2	1	1	6	6	2	6	3	3	3	3	3	2	3	3	0	0	0	0	0	0	0	0	0	0	0	1	0	1	1	0	0	0	5	6	6	#NULL!	#NULL!	5	#NULL!	4	4
2	34	3	2	4	1	1	1	2	2	1	1	2	2	6	3	3	3	3	3	3	3	3	0	0	0	0	0	0	0	1	1	0	0	2	0	1	1	0	1	1	5	5	6	6	5	5	#NULL!	4	4
1	27	3	2	1	1	1	1	1	1	1	1	6	5	6	3	1	1	3	3	3	3	1	1	1	1	0	0	0	1	0	0	0	0	1	1	1	1	1	1	1	6	6	6	6	#NULL!	2	#NULL!	4	1
2	23	7	1	2	1	1	1	1	1	2	1	1	3	6	3	3	2	3	1	2	3	3	0	0	0	0	0	1	0	1	0	0	0	2	0	3	0	1	1	1	6	6	5	6	6	4	#NULL!	4	4
1	34	3	2	4	3	1	1	5	2	6	6	3	5	6	1	1	-1	-1	1	2	1	1	0	0	0	0	0	0	0	0	0	0	0	1	1	1	1	0	0	1	2	5	#NULL!	#NULL!	4	2	#NULL!	1	1
2	28	2	4	4	2	3	1	6	1	1	6	5	5	6	3	3	3	3	3	3	4	3	0	0	0	0	0	0	0	1	0	0	0	1	0	1	0	0	0	0	#NULL!	6	6	#NULL!	2	2	#NULL!	4	4
2	24	8	1	4	2	3	1	1	1	1	1	4	1	5	3	3	3	3	3	3	3	3	1	0	0	0	0	0	0	0	0	0	0	2	0	3	0	0	0	0	6	6	6	6	3	6	2	4	4
2	32	3	2	4	2	1	1	6	1	1	1	6	1	6	4	4	4	4	4	4	4	4	0	0	0	0	0	0	0	0	0	0	0	1	0	1	1	0	0	1	#NULL!	6	6	6	#NULL!	6	#NULL!	5	5
1	27	3	1	4	1	1	1	2	1	1	6	5	2	6	4	3	3	3	2	4	3	4	0	0	0	0	0	0	0	0	0	0	0	2	1	1	0	0	1	1	5	6	6	#NULL!	2	5	#NULL!	5	4
1	34	7	2	4	1	1	1	1	1	1	6	6	3	6	1	2	2	3	3	3	2	2	1	1	0	0	0	0	0	0	0	0	0	1	1	3	1	0	1	1	6	6	6	#NULL!	#NULL!	4	#NULL!	1	2
2	35	3	3	4	3	2	1	6	3	6	6	3	4	6	3	3	3	3	3	3	3	3	1	0	0	0	0	0	0	0	0	0	0	1	0	1	1	0	0	1	#NULL!	4	#NULL!	#NULL!	4	3	#NULL!	4	4
1	31	2	4	4	1	3	1	3	1	1	6	5	3	6	4	4	4	3	3	3	4	3	0	0	0	0	0	0	0	0	0	0	0	1	1	1	0	0	1	0	4	6	6	#NULL!	2	4	#NULL!	5	5
2	21	7	1	2	1	4	1	1	2	1	6	1	2	6	4	4	4	3	3	3	3	3	0	0	0	0	0	0	0	0	1	0	0	2	0	3	0	1	1	0	6	5	6	#NULL!	6	5	#NULL!	5	5
1	30	7	1	4	1	3	1	1	1	1	1	1	3	6	4	4	4	4	4	4	4	4	0	0	0	0	0	0	0	0	0	0	0	1	1	3	0	0	1	0	6	6	6	6	6	4	#NULL!	5	5
2	29	3	2	4	3	3	1	6	4	3	6	6	3	6	-1	-1	-1	-1	-1	-1	-1	-1	0	0	0	0	0	0	0	0	0	0	0	1	0	1	1	0	0	0	#NULL!	3	4	#NULL!	#NULL!	4	#NULL!	3	3
2	35	3	2	4	1	1	1	3	3	4	1	2	4	6	3	3	3	3	3	3	3	3	1	0	1	0	1	0	0	0	0	0	0	1	0	1	1	0	1	1	4	4	3	6	5	3	#NULL!	4	4
1	26	4	1	4	1	1	1	6	1	1	6	6	5	5	2	3	3	3	2	3	3	3	1	0	0	0	0	0	0	0	0	0	0	1	1	2	0	0	1	1	#NULL!	6	6	#NULL!	#NULL!	2	2	2	4
2	31	8	2	4	1	1	1	1	1	1	2	2	1	5	3	2	3	2	2	3	3	1	1	0	0	0	0	0	0	0	0	0	0	1	0	3	1	0	1	1	6	6	6	5	5	6	2	4	2
2	35	5	2	4	1	1	1	3	1	1	1	1	1	5	3	1	2	2	3	2	3	1	1	0	0	0	0	0	0	0	0	0	0	2	0	2	1	0	1	1	4	6	6	6	6	6	2	4	1
2	32	7	2	4	2	1	1	6	1	1	1	1	1	3	3	2	3	3	3	3	3	3	0	0	0	0	0	0	0	0	0	0	0	1	0	3	1	0	0	1	#NULL!	6	6	6	6	6	4	4	2
2	29	7	1	4	1	1	1	1	1	1	1	4	1	1	3	3	3	3	3	2	3	3	1	1	0	0	0	0	0	0	0	0	1	2	0	3	0	0	1	1	6	6	6	6	3	6	6	4	4
2	30	5	2	4	1	3	1	1	1	1	1	6	2	6	3	3	3	3	3	3	2	2	0	0	0	0	0	0	0	0	0	0	0	2	0	2	1	0	1	0	6	6	6	6	#NULL!	5	#NULL!	4	4
2	31	8	2	1	2	2	1	1	1	1	1	1	1	1	3	3	3	3	3	3	3	3	0	0	0	0	0	0	0	0	0	0	0	2	0	3	1	1	0	1	6	6	6	6	6	6	6	4	4
2	35	4	2	4	3	1	1	1	1	1	1	1	1	6	2	3	3	3	3	3	3	3	0	0	0	0	0	0	0	0	0	0	0	2	0	2	1	0	0	1	6	6	6	6	6	6	#NULL!	2	4
2	33	7	2	4	1	3	1	1	1	1	6	1	1	6	3	2	3	3	2	2	3	3	0	0	0	0	0	0	0	0	0	0	1	2	0	3	1	0	1	0	6	6	6	#NULL!	6	6	#NULL!	4	2
1	19	7	1	2	1	4	1	5	1	1	1	1	1	6	4	4	4	4	4	4	4	4	1	0	0	0	0	0	0	0	0	0	0	2	1	3	0	1	1	0	2	6	6	6	6	6	#NULL!	5	5
1	30	3	2	4	1	2	1	3	1	1	6	6	4	6	3	2	2	2	2	2	3	2	0	0	0	0	0	0	0	0	0	0	0	2	1	1	1	0	1	1	4	6	6	#NULL!	#NULL!	3	#NULL!	4	2
1	34	7	2	1	1	1	1	3	2	1	1	4	4	1	4	4	4	4	4	4	4	4	0	0	0	0	0	0	0	0	0	0	0	1	1	3	1	1	1	1	4	5	6	6	3	3	6	5	5
2	21	8	1	2	2	4	1	1	1	1	6	1	1	6	4	4	2	3	3	3	3	3	1	0	0	0	0	0	0	0	1	0	0	1	0	3	0	1	0	0	6	6	6	#NULL!	6	6	#NULL!	5	5
1	24	9	1	2	1	4	1	1	1	1	2	2	3	6	4	4	4	4	4	2	3	2	1	0	0	0	1	0	0	1	1	0	0	1	1	3	0	1	1	0	6	6	6	5	5	4	#NULL!	5	5
1	26	8	1	2	2	1	1	2	2	2	2	2	2	5	4	3	3	3	3	3	3	3	0	0	0	0	0	0	0	0	0	0	0	2	1	3	0	1	0	1	5	5	5	5	5	5	2	5	4
1	21	8	1	2	2	4	1	1	1	1	6	2	2	6	4	3	2	4	3	1	4	3	0	0	0	0	0	0	0	0	1	0	0	2	1	3	0	1	0	0	6	6	6	#NULL!	5	5	#NULL!	5	4
1	27	7	1	2	2	1	1	1	1	1	1	1	1	1	4	4	4	4	4	3	4	4	1	0	0	0	0	0	0	0	0	0	0	1	1	3	0	1	0	1	6	6	6	6	6	6	6	5	5
[truncated: 20 more rows]
[truncated: 34 more columns]
